# Supplementary material for: Adverse health effects associated with household air pollution: a systematic review, meta-analysis, and burden estimation study
Source: PubMed Central journal article supplement (PMC7564377; doi:10.1016/s2214-109x(20)30343-0), 2020-10-15
Supplement: mmc1.pdf [file mmc1.pdf]

# THE LANCET

## Global Health

### Supplementary appendix

This appendix formed part of the original submission and has been peer reviewed. We post it as supplied by the authors.

Supplement to: Lee KK, Bing R, Kiang J, et al. Adverse health effects associated with household air pollution: a systematic review, meta-analysis, and burden estimation study. *Lancet Glob Health* 2020; **8**: e1427–34.

# **Adverse health effects associated with household air pollution: a systematic review, meta-analysis, and burden estimation study**

Kuan Ken Lee MD<sup>1</sup>, Rong Bing MD<sup>1</sup>, Joanne Kiang BSc<sup>1</sup>, Sophia Bashir BSc<sup>1</sup>, Nicholas Spath MD<sup>1</sup>, Dominik Stelzle MD<sup>2,3</sup>, Kevin Mortimer PhD<sup>4</sup>, Anda Bularga MD<sup>1</sup>, Dimitrios Doudesis MSc<sup>1,5</sup>, Shruti S Joshi MD<sup>1</sup>, Fiona Strachan PhD<sup>1</sup>, Sophie Gummy PhD<sup>6</sup>, Heather Adair-Rohani MPH<sup>6</sup>, Engi F Attia MD<sup>7</sup>, Michael H Chung MD<sup>8</sup>, Mark R Miller PhD<sup>1</sup>, David E Newby MD<sup>1</sup>, Nicholas L Mills MD<sup>1,5</sup>, David A McAllister MD\*<sup>9</sup> and Anoop SV Shah MD\*<sup>10</sup>

<sup>1</sup>*BHF Centre for Cardiovascular Science, University of Edinburgh, United Kingdom*

<sup>2</sup>*Center for Global Health, Department of Neurology, Technical University, Munich, Germany*

<sup>3</sup>*Chair of Epidemiology, Department of Sport and Health Sciences, Technical University of Munich, Germany*

<sup>4</sup>*Liverpool School of Tropical Medicine, Liverpool*

<sup>5</sup>*Usher Institute of Population Health Sciences and Informatics, University of Edinburgh, United Kingdom*

<sup>6</sup>*Department of Public Health and Environment, World Health Organization, Geneva, Switzerland*

<sup>7</sup>*Department of Medicine, University of Washington, Seattle, USA*

<sup>8</sup>*Department of Medicine, Aga Khan University, Nairobi, Kenya*

<sup>9</sup>*Institute of Health and Wellbeing, University of Glasgow, United Kingdom*

<sup>10</sup>*Department of non-communicable disease, London School of Hygiene and Tropical Medicine, United Kingdom*

*\*Contributed equally*

## **Correspondence and requests for reprints:**

Dr Anoop SV Shah  
Department of non communicable disease  
Keppel St,  
Bloomsbury,  
London  
WC1E 7HT

Mobile: +44 7766 544156

E-mail: [anoopsshah@gmail.com](mailto:anoopsshah@gmail.com)

## Table of contents

|                                                                                                                                                                          |    |
|--------------------------------------------------------------------------------------------------------------------------------------------------------------------------|----|
| Supplementary text 1. Literature search strategy.....                                                                                                                    | 4  |
| Supplementary text 2. Risk of bias assessment criteria.....                                                                                                              | 9  |
| Supplementary text 3. Method for calculating burden and mortality attributable to household air pollution.....                                                           | 10 |
| Figure S1: Normal probability plots of the risk ratios for cardiorespiratory and adverse pregnancy outcomes associated with use of polluting fuels and technologies..... | 14 |
| Figure S2: Normal probability plots of the risk ratios for mortality associated with use of polluting fuels and technologies.....                                        | 15 |
| Figure S3: Meta-regression for COPD by mean age.....                                                                                                                     | 16 |
| Figure S4: Meta-regression for Asthma by mean age.....                                                                                                                   | 17 |
| Figure S5: Meta-regression for Tuberculosis by mean age.....                                                                                                             | 18 |
| Figure S6: Meta-regression for lung cancer by mean age.....                                                                                                              | 19 |
| Figure S7: Meta-regression for cardiovascular disease by mean age.....                                                                                                   | 20 |
| Figure S8: Pooled risk ratios for cardiorespiratory conditions associated with use of polluting fuels and technologies stratified by gender.....                         | 21 |
| Figure S9: Flow diagram of study selection.....                                                                                                                          | 22 |
| Figure S10: Pooled risk ratio for asthma associated with use of polluting fuels and technologies.....                                                                    | 23 |
| Figure S11: Pooled risk ratio for chronic obstructive pulmonary disease associated with use of polluting fuels and technologies.....                                     | 24 |
| Figure S12: Pooled risk ratio for acute respiratory infection in children associated with use of polluting fuels and technologies.....                                   | 25 |
| Figure S13: Pooled risk ratio for acute respiratory infection in adults associated with use of polluting fuels and technologies.....                                     | 26 |
| Figure S14: Pooled risk ratio for lung cancer associated with use of polluting fuels and technologies.....                                                               | 27 |
| Figure S15: Pooled risk ratio for tuberculosis associated with use of polluting fuels and technologies.....                                                              | 28 |
| Figure S16: Pooled risk ratio for cardiovascular disease associated with use of polluting fuels and technologies.....                                                    | 29 |
| Figure S17: Pooled risk ratio for low birthweight associated with use of polluting fuels and technologies.....                                                           | 30 |
| Figure S18: Pooled risk ratio for under-five mortality associated with use of polluting fuels and technologies.....                                                      | 31 |
| Figure S19: Pooled risk ratio for cardiovascular mortality associated with use of polluting fuels and technologies.....                                                  | 32 |
| Figure S21: Pooled risk ratio for all-cause mortality associated with use of polluting fuels and technologies.....                                                       | 34 |
| Figure S22: Pooled risk ratio for respiratory disease associated with use of gas for cooking or heating.....                                                             | 35 |
| Figure S23: Pooled risk ratios for respiratory conditions and symptoms in studies comparing use of improved cook stoves and traditional cook stoves.....                 | 36 |
| Figure S24: Pooled risk ratio for symptoms of wheeze associated with use of polluting fuels and technologies.....                                                        | 37 |
| Figure S25: Pooled risk ratio for symptoms of cough associated with use of polluting fuels and technologies.....                                                         | 38 |
| Figure S26: Pooled risk ratio for symptoms of shortness of breath associated with use of polluting fuels and technologies.....                                           | 39 |

|                                                                                                                                                                                                                 |    |
|-----------------------------------------------------------------------------------------------------------------------------------------------------------------------------------------------------------------|----|
| Figure S27: Pooled mean difference in birth weight associated with use of polluting fuels and technologies. ....                                                                                                | 40 |
| Figure S28: Pooled risk ratio for asthma and respiratory symptoms per 10 ppb increase in indoor nitrogen dioxide. ....                                                                                          | 41 |
| Figure S29: Pooled risk ratio for asthma and respiratory symptoms per 10 µg/m <sup>3</sup> increase in indoor PM <sub>2.5</sub> . ....                                                                          | 42 |
| Figure S30: Pooled risk ratios for cardiorespiratory and adverse pregnancy outcomes associated with use of polluting fuels and technologies across studies assessed to be at low or moderate risk of bias. .... | 43 |
| Figure S31: Pooled risk ratios for mortality associated with use of polluting fuels and technologies across studies assessed to be at low or moderate risk of bias. ....                                        | 44 |
| Figure S32: Sensitivity analysis of risk ratios for cardiorespiratory and adverse pregnancy outcomes associated with use of polluting fuels and technologies across longitudinal studies. ....                  | 45 |
| Figure S33: Pooled risk ratios for cardiorespiratory and paediatric conditions in studies comparing use of polluting fuels or technologies and clean fuels. ....                                                | 46 |
| Figure S34: Trends in burden of disease (disability adjusted life years) attributable to household air pollution stratified by 2018 World Bank income groups from 2000-2017. ....                               | 47 |
| Figure S35: Cartogram of global burden of disease attributable to household air pollution in 2017... ..                                                                                                         | 48 |
| Figure S36: Trends in deaths attributable to household air pollution stratified by income. ....                                                                                                                 | 49 |
| Figure S37: Trends in deaths attributable to household air pollution stratified by WHO regions. ....                                                                                                            | 50 |
| Figure S38: Trends in cardiovascular, respiratory and under five mortality attributable to household air pollution. ....                                                                                        | 51 |
| Figure S39: Trends in burden attributable to household air pollution using pooled risk ratios from studies where the comparator was clean fuel use stratified by WHO regions. ....                              | 52 |
| Figure S40: Trends in burden attributable to household air pollution using pooled risk ratios from studies that were assessed to be at low or moderate risk of bias stratified by WHO regions. ....             | 53 |
| Table S1: PRISMA Checklist. ....                                                                                                                                                                                | 54 |
| Table S2: List of countries and World Bank income group stratified by WHO regions. ....                                                                                                                         | 56 |
| Table S3: Baseline details of included studies. ....                                                                                                                                                            | 61 |
| Table S4: Trends in cause-specific burden of disease attributable to household air pollution from 2000-2017. ....                                                                                               | 83 |
| Table S5: Trends in burden of disease attributable to household air pollution stratified by 2018 World Bank income groups from 2000-2017. ....                                                                  | 84 |
| Table S6: Trends in burden of disease attributable to household air pollution stratified by WHO regions from 2000-2017. ....                                                                                    | 85 |
| Table S7: Country-level estimates of burden of disease and deaths attributable to household air pollution in 2017. ....                                                                                         | 86 |
| References. ....                                                                                                                                                                                                | 93 |

## Supplementary text 1. Literature search strategy

MEDLINE (up to 2<sup>nd</sup> Apr 2020: 18,807 search results)

1. Air Pollution, Indoor/
2. ((household or indoor\*) adj2 air adj2 (pollut\* or quality)).tw.
3. ((indoor or household or domestic or home) adj3 (fire or fires or smok\* or woodsmok\*)).tw.
4. (time\* adj5 (stove or cook\*)).tw.
5. ((combust\* or burn\*) adj3 (stove\* or wood or kerosene or biomass or coal or charcoal or dung or crop waste\* or agricultur\* residu\*)).tw.
6. (stove\* or cookstove\* or kitchen ventilat\* or combustion or house construction or solar).tw.
7. (vent\* adj5 (home\* or living space\* or household\* or kitchen\* or cook\* or stove\* or window\* or hood\* or grate\*)).tw.
8. ((improv\* or replac\* or chang\* or reduc\*) adj5 (fuel\* or biogas\* or burn\* or ethanol\* or gas or electric\* or energy or lamp\* or kerosene or fire\* or smok\* or dung or cook\* or chula or chulla or coal or paraffin or charcoal or crop waste\* or agricultural residue\* or combustion)).tw.
9. or/1-8
10. exp Myocardial Infarction/
11. exp Coronary Thrombosis/
12. Cardiovascular Disease.mp.
13. acute coronary.mp.
14. Myocardial infarct\$.mp.
15. heart infarct.mp.
16. acs.mp.
17. ami.mp.
18. (coronary adj3 syndrome\$.mp.
19. cerebrovascular disorders/ or basal ganglia cerebrovascular disease/ or brain ischemia/ or exp brain infarction/ or hypoxia-ischemia, brain/ or carotid artery diseases/ or carotid artery thrombosis/ or carotid artery, internal, dissection/ or intracranial arterial diseases/ or cerebral arterial diseases/ or infarction, anterior cerebral artery/ or infarction, middle cerebral artery/ or infarction, posterior cerebral artery/ or exp "intracranial embolism and thrombosis"/ or exp stroke/ or vertebral artery dissection/
20. (isch?emi\$ adj5 (stroke\$ or apoplex\$ or cerebral vasc\$ or cerebrovasc\$ or cva)).tw.
21. ((brain or cerebr\$ or cerebell\$ or vertebrobasil\$ or hemispher\$ or intracran\$ or intracerebral or infratentorial or supratentorial or middle cerebr\$ or mca\$ or anterior circulation or basilar artery or vertebral artery) adj5 (isch?emi\$ or infarct\$ or thrombo\$ or emboli\$ or occlus\$ or hypoxi\$)).tw.
22. exp Pulmonary Disease, Chronic Obstructive/
23. (obstruct\$ adj3 (lung\$ or respirat\$ or pulmonar\$) adj3 disease\$.mp.
24. Bronchiti\$.mp.
25. emphysema\$.mp.
26. (chronic adj5 obstruct\$.mp.
27. (pulmonar\$ or lung\$ or airway\$ or airflow\$ or bronch\$ or respirat\$.mp.
28. 26 and 27
29. (COPD or COAD).mp.
30. AECB.mp.
31. exp asthma/
32. asthma?.ti,ab,kw.
33. exp tuberculosis/
34. (tuberculosis or TB).mp.
35. exp pneumonia/
36. exp respiratory tract infection\$/
37. (pneumonia\$ or lung inflammation\$ or respiratory tract infection\$ or respiratory infection\$.mp.
38. (acute respiratory infection\* or acute respiratory tract infection\* or lower respiratory infection\* or lower respiratory tract infection\*).tw.
39. (ari or lrti or alri).tw.
40. bronchitis/ or exp bronchiolitis/
41. (bronchiolit\* or acute bronchit\* or wheez\*).tw.
42. Respiratory Syncytial Virus Infections/
43. respiratory syncytial viruses/ or respiratory syncytial virus, human/
44. (respiratory syncytial virus\* or rsv).tw.
45. exp Haemophilus influenzae/
46. Streptococcus pneumoniae/
47. Staphylococcus aureus/
48. (streptococ\* or staphylococ\* or haemophilus influenzae).tw.
49. ((lung or pulmonary) adj2 (inflamm\* or infect\*)).tw.

50. (low adj3 (birthweight\$ or birth weight\$)).ti,ab.
51. (lbw or vlbw or elbw).ti,ab.
52. Stillbirth/
53. Fetal death/
54. Foetal death/
55. fetal death\$.tw.
56. foetal death\$.tw.
57. perinatal death\$.tw.
58. intrauterine death\$.tw.
59. intrauterine fetal death\$.tw.
60. intrauterine foetal death\$.tw.
61. perinatal fetal death\$.tw.
62. perinatal foetal death\$.tw.
63. fetal mortality.tw.
64. foetal mortality.tw.
65. intrauterine fetal mortality.tw.
66. intrauterine foetal mortality.tw.
67. perinatal fetal mortality.tw.
68. perinatal foetal mortality.tw.
69. pregnancy loss.tw.
70. exp Mortality/
71. mortality.tw,ot.
72. mortaliti\$.tw,ot.
73. exp lung cancer/
74. (pulmonar\$ or lung\$ or airway\$ or airflow\$ or bronch\$ or respirat\$).mp.
75. (cancer\$ or neoplasm\$ or tumour\$ or tumour\$).mp.
76. 74 and 75
77. 10 or 11 or 12 or 13 or 14 or 15 or 16 or 17 or 18 or 19 or 20 or 21 or 22 or 23 or 24 or 27 or 28 or 29 or 30 or 31 or 32 or 33 or 34 or 35 or 36 or 37 or 38 or 39 or 40 or 41 or 42 or 43 or 44 or 45 or 46 or 47 or 48 or 49 or 50 or 51 or 52 or 53 or 54 or 55 or 56 or 57 or 58 or 59 or 60 or 61 or 62 or 63 or 64 or 65 or 66 or 67 or 68 or 69 or 72 or 73 or 76
78. 9 and 77
79. limit 78 to humans

**EMBASE** (up to 2<sup>nd</sup> Apr 2020: 23,519 search results)

1. Air Pollution, Indoor/
2. ((household or indoor\*) adj2 air adj2 (pollut\* or quality)).tw.
3. ((indoor or household or domestic or home) adj3 (fire or fires or smok\* or woodsmok\*)).tw.
4. (time\* adj5 (stove or cook\*)).tw.
5. ((combust\* or burn\*) adj3 (stove\* or wood or kerosene or biomass or coal or charcoal or dung or crop waste\* or agricultur\* residu\*)).tw.
6. (stove\* or cookstove\* or kitchen ventilat\* or combustion or house construction or solar).tw.
7. (vent\* adj5 (home\* or living space\* or household\* or kitchen\* or cook\* or stove\* or window\* or hood\* or grate\*)).tw.
8. ((improv\* or replac\* or chang\* or reduc\*) adj5 (fuel\* or biogas\* or burn\* or ethanol\* or gas or electric\* or energy or lamp\* or kerosene or fire\* or smok\* or dung or cook\* or chula or chulla or coal or paraffin or charcoal or crop waste\* or agricultural residue\* or combustion)).tw.
9. or/1-8
10. exp Heart Infarction/
11. coronary thrombosis.mp. or exp Coronary Artery Thrombosis/
12. cardiovascular disease.mp.
13. acute coronary.mp.
14. Myocardial infarct\$.mp.
15. heart infarct:.mp.
16. acs.mp.
17. ami.mp.
18. (coronary adj3 syndrome\$.mp.
19. brain infarction/ or brain stem infarction/ or cerebellum infarction/ or exp brain ischemia/ or carotid artery disease/ or exp carotid artery obstruction/ or cerebral artery disease/ or exp cerebrovascular accident/ or exp occlusive cerebrovascular disease/ or stroke patient/
20. (isch?emi\$ adj5 (stroke\$ or apoplex\$ or cerebral vasc\$ or cerebrovasc\$ or cva)).tw.
21. ((brain or cerebr\$ or cerebell\$ or vertebrobasil\$ or hemispher\$ or intracran\$ or intracerebral or infratentorial or supratentorial or middle cerebr\$ or mca\$ or anterior circulation or basilar artery or vertebral artery) adj5 (isch?emi\$ or infarct\$ or thrombo\$ or emboli\$ or occlus\$ or hypoxi\$)).tw.

22. Chronic Obstructive Lung Disease/
23. Emphysema/
24. exp Lung Emphysema/
25. Chronic Bronchitis/
26. (obstruct\$ adj3 (lung\$ or respirat\$ or pulmonar\$) adj3 disease\$).mp.
27. Bronchiti\$.mp.
28. emphysema\$.mp.
29. (chronic adj5 obstruct\$).mp.
30. (pulmonar\$ or lung\$ or airway\$ or airflow\$ or bronch\$ or respirat\$).mp.
31. 29 and 30
32. (COPD or COAD).mp.
33. AECB.mp.
34. exp \*asthma/
35. asthma?.ti,ab,kw.
36. exp lung tuberculosis/
37. (tuberculosis or TB).mp.
38. exp Pneumonia/
39. (pneumon\* or bronchopneumon\* or pleuropneumon\*).tw.
40. bronchitis/ or exp bronchiolitis/
41. (bronchiolit\* or acute bronchit\* or wheez\*).tw.
42. Respiratory Syncytial Virus Infections/
43. respiratory syncytial viruses/ or respiratory syncytial virus, human/
44. (respiratory syncytial virus\* or rsv).tw.
45. exp Haemophilus influenzae/
46. Streptococcus pneumoniae/
47. Staphylococcus aureus/
48. (streptococc\* or staphylococc\* or haemophilus influenzae).tw.
49. ((lung or pulmonary) adj2 (inflamm\* or infect\*)).tw.
50. (low adj3 (birthweight\$ or birth weight\$)).ti,ab.
51. (lbw or vlbw or elbw).ti,ab.
52. Stillbirth/
53. Fetal death/
54. Foetal death/
55. fetal death\$.tw.
56. foetal death\$.tw.
57. perinatal death\$.tw.
58. intrauterine death\$.tw.
59. intrauterine fetal death\$.tw.
60. intrauterine foetal death\$.tw.
61. perinatal fetal death\$.tw.
62. perinatal foetal death\$.tw.
63. pregnancy loss.tw.
64. exp mortality/
65. (mortality or mortaliti\*).tw,ot.
66. exp lung cancer/
67. (pulmonar\$ or lung\$ or airway\$ or airflow\$ or bronch\$ or respirat\$).mp.
68. (cancer\$ or neoplasm\$ or tumour\$ or tumour\$).mp.
69. 67 and 68
70. 10 or 11 or 12 or 13 or 14 or 15 or 16 or 17 or 18 or 19 or 20 or 21 or 22 or 23 or 24 or 25 or 26 or 27 or 28 or 31 or 32 or 33 or 34 or 35 or 36 or 37 or 38 or 39 or 40 or 41 or 42 or 43 or 44 or 45 or 46 or 47 or 48 or 49 or 50 or 51 or 52 or 53 or 54 or 55 or 56 or 57 or 58 or 59 or 60 or 61 or 62 or 63 or 64 or 65 or 66 or 69
71. 9 and 70
72. limit 71 to human

**Web of Science** (up to 2<sup>nd</sup> Apr 2020: 13,670 search results)

1. TS=(air pollution)
2. TS=(stove\* or cookstove\* or biomass or fuel\* or biogas\* or burn\* or ethanol\* or gas or electric\* or energy or lamp\* or kerosene or fire\* or smok\* or dung or cook\* or chula or chulla or coal or paraffin or charcoal or crop waste\* or agricultural residue\* or combustion or wood or fire\* or solar)
3. 1 OR 2
4. TS=(indoor or household or domestic or home)
5. 3 AND 4

6. TS=(Myocardial Infarction or Coronary Thrombosis or acute coronary syndrome or ACS or cerebrovascular disease or stroke or brain infarction or brain ischaemia or brain ischemia or chronic obstructive pulmonary disease or bronchitis or emphysema or COPD or COAD or asthma or tuberculosis or TB or pneumonia or respiratory tract infection or ari or lrti or alri or bronchitis or bronchiolitis or respiratory syncytial virus\* or rsv or haemophilus influenzae or streptococcus pneumoniae or staphylococcus aureus or lung cancer\* or lung neoplasm\* or lung tumor\* or lung tumour\* or low birth weight or still birth or foetal death or foetal death or perinatal death or intrauterine death or pregnancy loss or mortality or mortalit\*)
7. 5 AND 6

**Global Health** (up to 2<sup>nd</sup> Apr 2020: 4,599 search results)

1. exp indoor air pollution/
2. ((household or indoor\*) adj2 air adj2 (pollut\* or quality)).tw.
3. ((indoor or household or domestic or home) adj3 (fire or fires or smok\* or woodsmok\*)).tw.
4. (time\* adj5 (stove or cook\*)).tw.
5. ((combust\* or burn\*) adj3 (stove\* or wood or kerosene or biomass or coal or charcoal or dung or crop waste\* or agricultur\* residu\*)).tw.
6. (stove\* or cookstove\* or kitchen ventilat\* or combustion or house construction or solar).tw.
7. (vent\* adj5 (home\* or living space\* or household\* or kitchen\* or cook\* or stove\* or window\* or hood\* or grate\*)).tw.
8. ((improv\* or replac\* or chang\* or reduc\*) adj5 (fuel\* or biogas\* or burn\* or ethanol\* or gas or electric\* or energy or lamp\* or kerosene or fire\* or smok\* or dung or cook\* or chula or chulla or coal or paraffin or charcoal or crop waste\* or agricultural residue\* or combustion)).tw.
9. or/1-8
10. exp Myocardial Infarction/
11. Cardiovascular Disease.mp.
12. acute coronary.mp.
13. Myocardial infarct\$.mp.
14. heart infarct.mp.
15. acs.mp.
16. ami.mp.
17. (coronary adj3 syndrome\$.mp).
18. cerebrovascular disorders/ or basal ganglia cerebrovascular disease/ or brain ischemia/ or exp brain infarction/ or hypoxia-ischemia, brain/ or carotid artery diseases/ or carotid artery thrombosis/ or carotid artery, internal, dissection/ or intracranial arterial diseases/ or cerebral arterial diseases/ or infarction, anterior cerebral artery/ or infarction, middle cerebral artery/ or infarction, posterior cerebral artery/ or exp "intracranial embolism and thrombosis"/ or exp stroke/ or vertebral artery dissection/
19. (isch?emi\$ adj5 (stroke\$ or apoplex\$ or cerebral vasc\$ or cerebrovasc\$ or cva)).tw.
20. ((brain or cerebr\$ or cerebell\$ or vertebrobasil\$ or hemispher\$ or intracran\$ or intracerebral or infratentorial or supratentorial or middle cerebr\$ or mca\$ or anterior circulation or basilar artery or vertebral artery) adj5 (isch?emi\$ or infarct\$ or thrombo\$ or emboli\$ or occlus\$ or hypoxi\$)).tw.
21. exp Chronic Obstructive Pulmonary Disease/
22. (obstruct\$ adj3 (lung\$ or respirat\$ or pulmonar\$) adj3 disease\$.mp).
23. Bronchiti\$.mp.
24. emphysema\$.mp.
25. (chronic adj5 obstruct\$.mp).
26. (pulmonar\$ or lung\$ or airway\$ or airflow\$ or bronch\$ or respirat\$.mp).
27. 25 and 26
28. (COPD or COAD).mp.
29. AECB.mp.
30. exp asthma/
31. asthma?.mp.
32. exp tuberculosis/
33. (tuberculosis or TB).mp.
34. exp pneumonia/
35. (pneumonia\$ or lung inflammation\$ or respiratory tract infection\$ or respiratory infection\$.mp).
36. (acute respiratory infection\* or acute respiratory tract infection\* or lower respiratory infection\* or lower respiratory tract infection\*).tw.
37. (ari or lrti or alri).tw.
38. bronchitis/ or exp bronchiolitis/
39. (bronchiolit\* or acute bronchit\* or wheez\*).tw.
40. (respiratory syncytial virus\* or rsv).tw.
41. exp Haemophilus influenzae/
42. Streptococcus pneumoniae/



43. Staphylococcus aureus/
44. (streptococc\* or staphylococc\* or haemophilus influenzae).tw.
45. ((lung or pulmonary) adj2 (inflamm\* or infect\*)).tw.
46. (low adj3 (birthweight\$ or birth weight\$)).ti,ab.
47. (lbw or vlbw or elbw).ti,ab.
48. Stillbirth/
49. Fetal death/
50. Foetal death/
51. fetal death\$.tw.
52. foetal death\$.tw.
53. perinatal death\$.tw.
54. intrauterine death\$.tw.
55. intrauterine fetal death\$.tw.
56. intrauterine foetal death\$.tw.
57. perinatal fetal death\$.tw.
58. perinatal foetal death\$.tw.
59. fetal mortality.tw.
60. foetal mortality.tw.
61. intrauterine fetal mortality.tw.
62. intrauterine foetal mortality.tw.
63. perinatal fetal mortality.tw.
64. perinatal foetal mortality.tw.
65. pregnancy loss.tw.
66. exp Mortality/
67. mortality.tw,ot.
68. mortaliti\$.tw,ot.
69. exp lung cancer/
70. (pulmonar\$ or lung\$ or airway\$ or airflow\$ or bronch\$ or respirat\$).mp.
71. (cancer\$ or neoplasm\$ or tumour\$ or tumour\$).mp.
72. 70 and 71
73. 10 or 11 or 12 or 13 or 14 or 15 or 16 or 17 or 18 or 19 or 20 or 21 or 22 or 23 or 24 or 27 or 28 or 29 or 30 or 31 or 32 or 33 or 34 or 35 or 36 or 37 or 38 or 39 or 40 or 41 or 42 or 43 or 44 or 45 or 46 or 47 or 48 or 49 or 50 or 51 or 52 or 53 or 54 or 55 or 56 or 57 or 58 or 59 or 60 or 61 or 62 or 63 or 64 or 65 or 66 or 67 or 68 or 69 or 72
74. 9 and 73

## **Supplementary text 2. Risk of bias assessment criteria**

Each individual study was assessed for risk of bias in the assessment of endpoints and adjustment for confounders. Studies that used International Classification of Disease (ICD) codes, physician diagnosis or that used all clinical information to define endpoints were deemed at low risk of bias. Studies that used less robust definitions such as those reliant on participant questionnaires alone were considered as high risk of bias. For confounder adjustment, studies that have adjusted for age, sex and two other relevant covariates were deemed to be at low risk of bias. Studies that have only adjusted for age or sex were considered at moderate risk of bias. Studies that have not adjusted for age, sex or smoking were classified as high risk of bias.

### Supplementary text 3. Method for calculating burden and mortality attributable to household air pollution

**Step 1** We performed a systematic literature review and meta-analysis to calculate the pooled risk ratio for each individual cardiorespiratory, pediatric and maternal outcome associated with household air pollution (HAP). Where the risk estimates and confidence intervals were reported within the articles, we have not calculated confidence intervals but have instead used those reported within the article. However, where risk ratios were not reported but a 2X2 table was reported, the risk ratios and confidence intervals were calculated as follows:

|             | Event | No event |
|-------------|-------|----------|
| Exposed     | A     | B        |
| Not exposed | C     | D        |

$$\text{Risk ratio (RR)} = \frac{AD}{BC}$$

The meta-analyses were performed using log units.

$$\ln RR = \ln(RR)$$

with the approximate variance (V) and standard error (SE) calculated as follows

$$V_{\ln RR} = \frac{1}{A} + \frac{1}{B} + \frac{1}{C} + \frac{1}{D}$$

and

$$SE_{\ln RR} = \sqrt{V_{\ln RR}}$$

We anticipated heterogeneity between studies when estimating the risk ratio due to different study designs, methods of analysis and varying adjustment, and geographical and population differences. We therefore used a random effects model to account for both within and between study heterogeneity.

**Step 2** At a study level, we explored interaction between age and cause-specific risk of household air pollution in adults (*Supplementary figures 1-5*).

We further evaluated sex interaction in studies that provided risk ratios stratified by sex (11 studies for cardiovascular disease and 27 studies for respiratory disease). For cardiovascular disease, no significant interaction was observed (1.00, 95%CI 0.92-1.09). For respiratory disease, we observed a weak interaction (1.16, 95% CI 1.01-1.33).

Given the absence / weak interaction of age/sex and risk of adult cardiorespiratory disease associated with indoor air pollution we did not compute age- and sex- stratified cause specific risk ratios.

**Step 3** We obtained annual prevalence estimates of polluting fuel use in 183 countries from 2000 to 2017 from the World Health Organization (WHO). This was derived by WHO through multilevel modelling based on national survey data on primary cooking fuel. For each country, we obtained WHO derived unpublished prevalence estimates with uncertainty intervals stratified by year.

Similarly, we obtained annual cause and year specific burden (DALYs) and mortality estimates from the Institute of Health Metrics and Evaluation (IHME) from 2000 to 2017 across these countries.<sup>1</sup>

**Step 4** Assumptions

- We assume that the pooled risk ratios obtained from a range of case-control/cohort/cross-sectional studies were applicable across both developed and developing countries.
- The prevalence data derived from WHO at national levels were not stratified by age but applicable to the entire population. As such when calculating the population attributable fraction (see below) we applied these prevalence estimates to the entire population.
- We were limited to those confounders included in the primary studies, and while most studies adjusted for patient demographics and some risk factors / mediators including social deprivation there is the potential for residual confounding.

**Step 5** We used a simulation based approach to estimate the cause specific population attributable fraction for household air pollution.

The cause-specific risk estimates from random effects meta-analysis were represented as log normal distributions, from which 10,000 samples were obtained using R. Likewise, we represented the prevalence of HAP as a beta distribution and obtained 10,000 samples for each country. We subsequently performed the following calculation for each of the 10,000 samples to derive the cause specific population attributable fraction:

$$\text{Population Attributable Fraction (PAF)} = \frac{\text{Prevalence} * (RR - 1)}{1 + \text{Prevalence} * (RR - 1)}$$

We report these uncertainty estimates as uncertainty range (UR). The uncertainty ranges can be viewed as approximate Bayesian posterior probability limits with very diffuse priors for the prevalence estimates and risk-ratios.

**Step 6** In a similar manner as Step 5, we represented the cause specific disability-adjusted life years (DALYs) and mortality for each country as log normal distributions and obtained 10,000 samples. For each of the 10,000 samples, we applied the cause specific population attributable fraction calculated in Step 5 to the cause specific DALYs and mortality for each country to estimate the burden and mortality attributable to HAP using the following formula:

$$\text{DALYs or mortality attributable to HAP} = \text{PAF} \times \text{DALYs or mortality}$$

**Step 7** Steps 5-6 were repeated for each exposure-outcome pair to calculate the burden of disease and mortality for each country. Burden estimates were calculated using outcome-specific risk ratios whilst mortality estimates were calculated using cause-specific mortality risk ratios. We classified each country into WHO regions and 2018 World Bank income groups. Burden and mortality estimate for each WHO region and income group were calculated by summing the country level estimates within each group.

### Deriving the population attributable fraction of COPD attributable to household air pollution in India in 2017

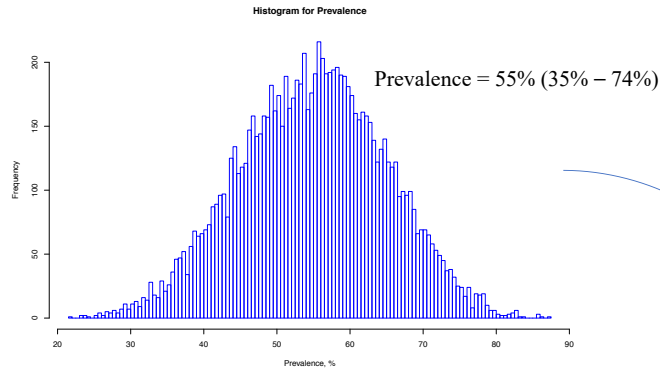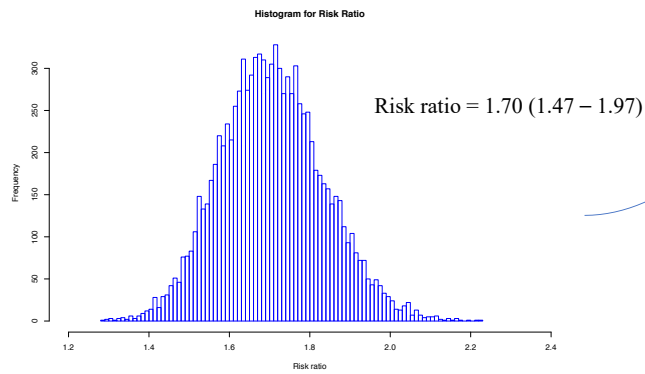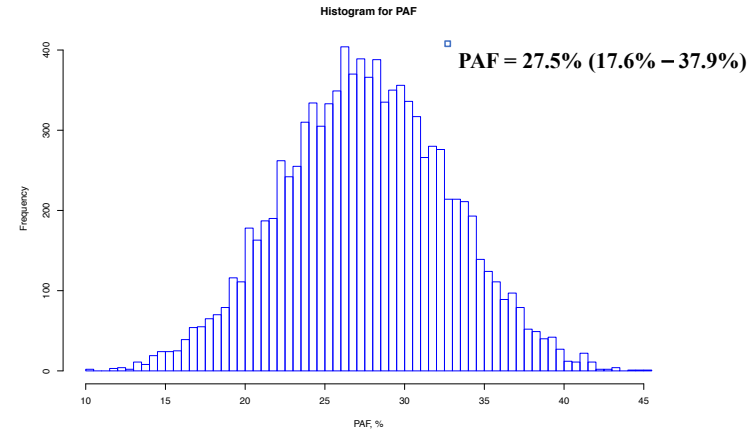

$$\text{Population Attributable Fraction (PAF)} = \frac{\text{Prevalence} * (RR - 1)}{1 + \text{Prevalence} * (RR - 1)}$$

Illustration for deriving country-specific burden:

### Deriving the burden of COPD attributable to household air pollution in India in 2017

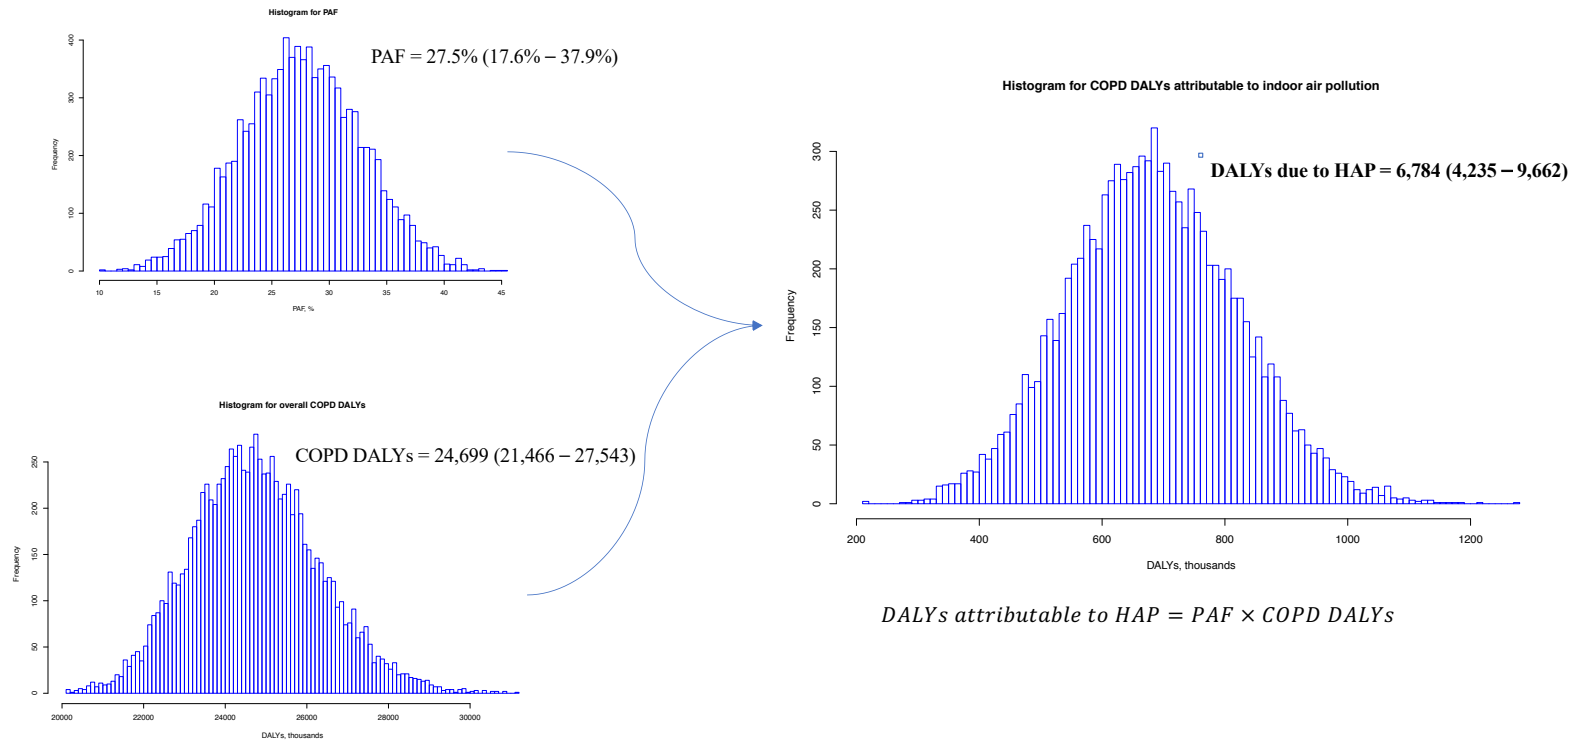

**Figure S1: Normal probability plots of the risk ratios for cardiorespiratory and adverse pregnancy outcomes associated with use of polluting fuels and technologies**

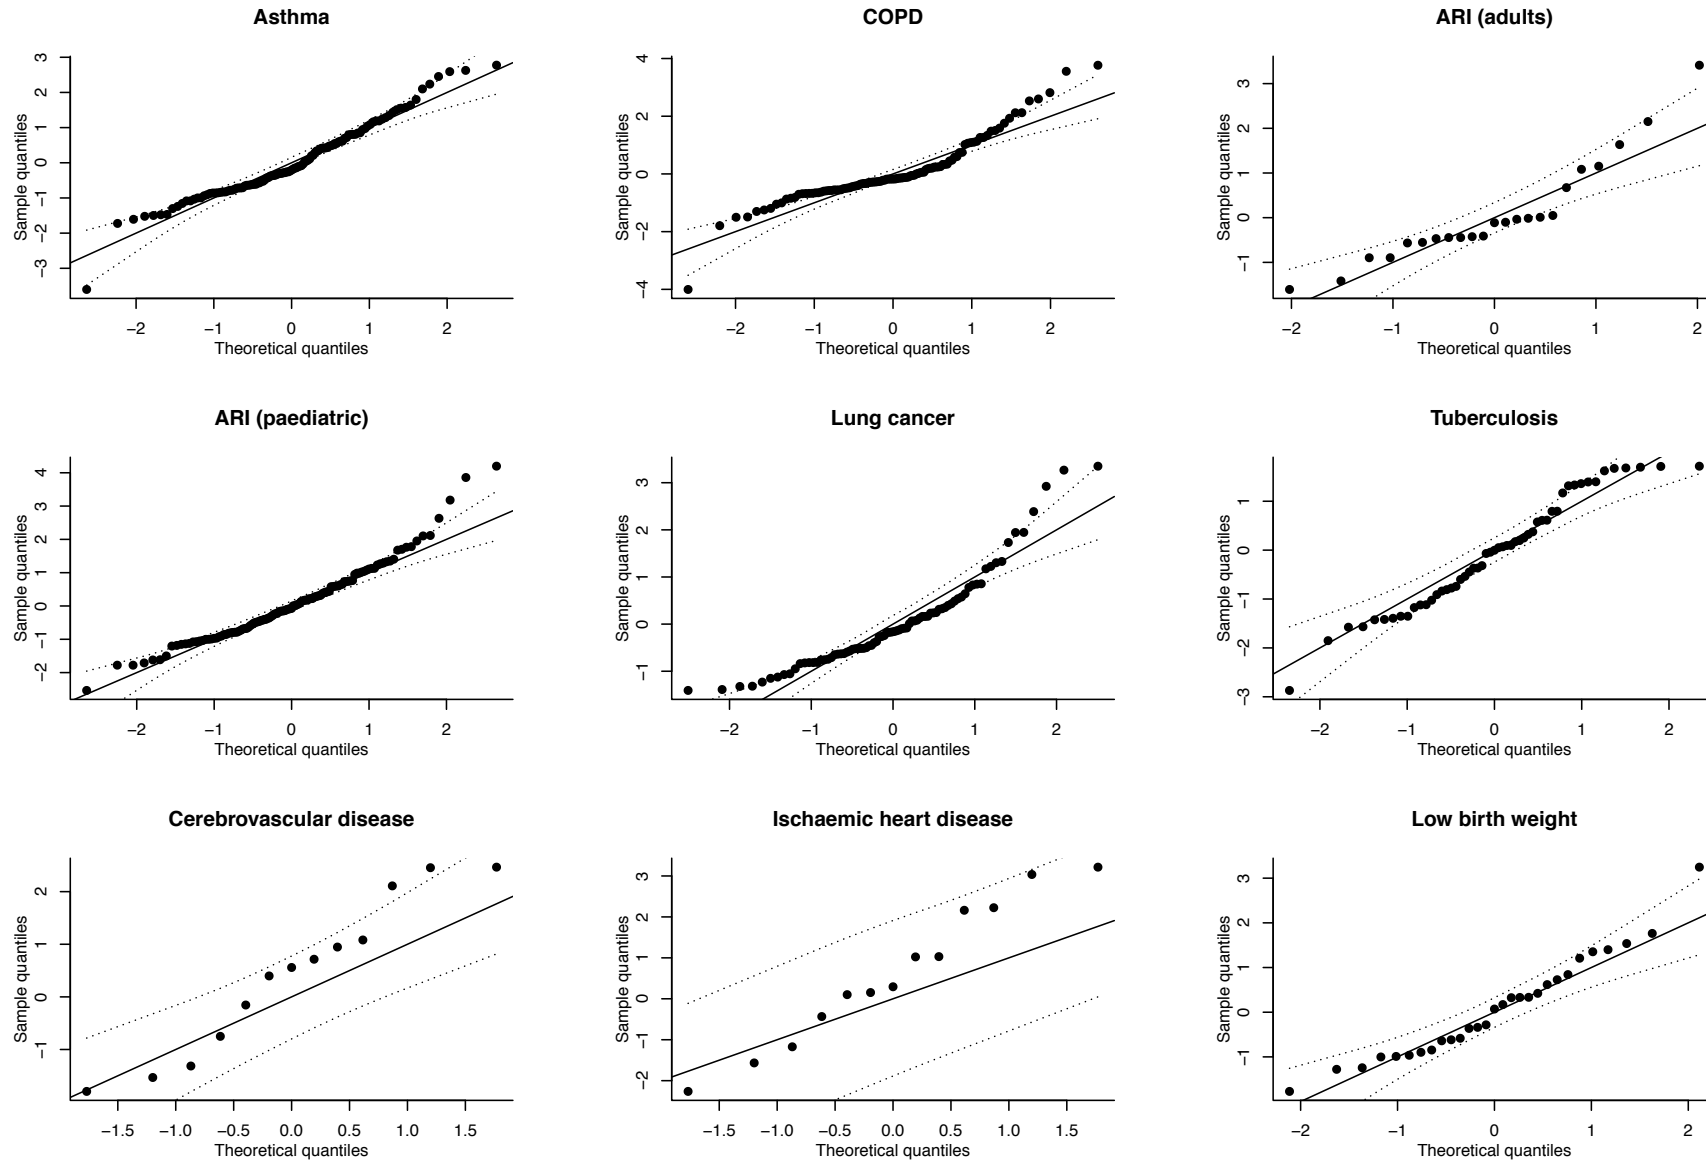

**Figure S2: Normal probability plots of the risk ratios for mortality associated with use of polluting fuels and technologies**

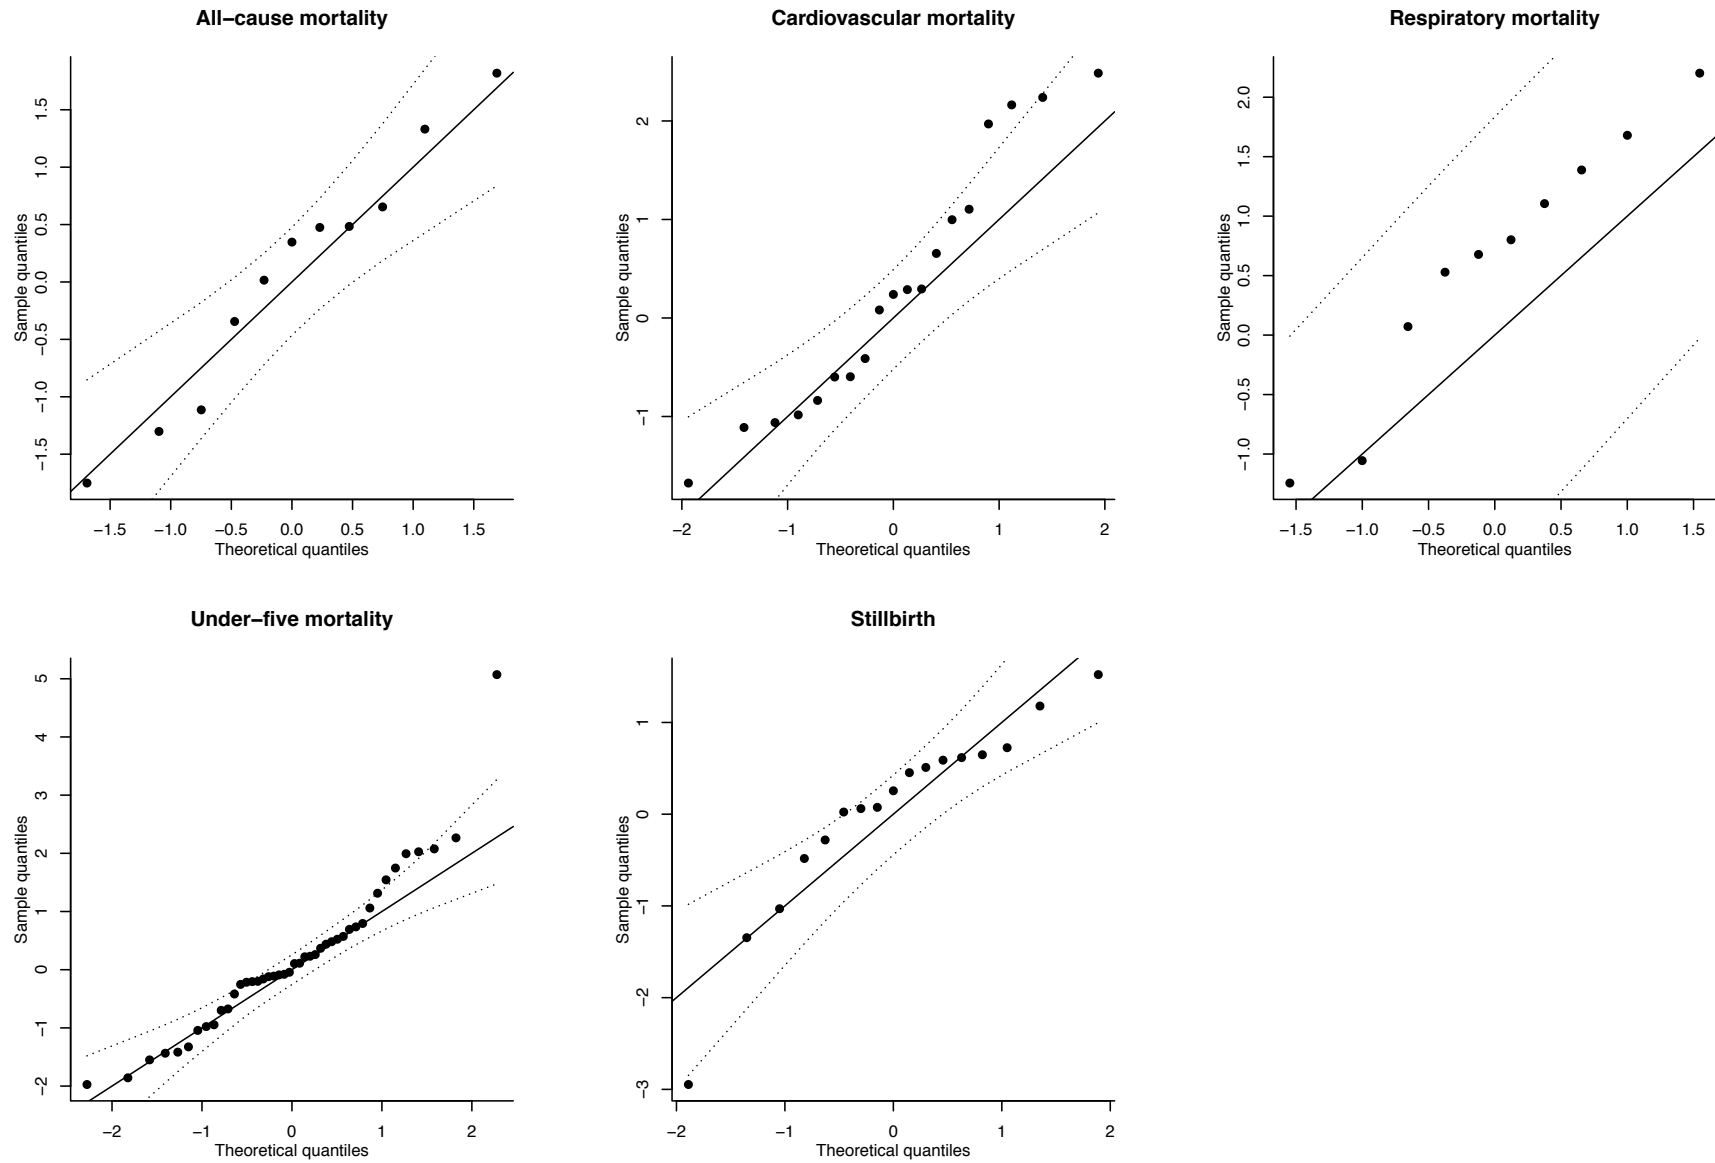



**Figure S3: Meta-regression for COPD by mean age**

(P value for interaction = 0.910)

\*size of each dot represents the weight of each risk estimate using the inverse-variance method.

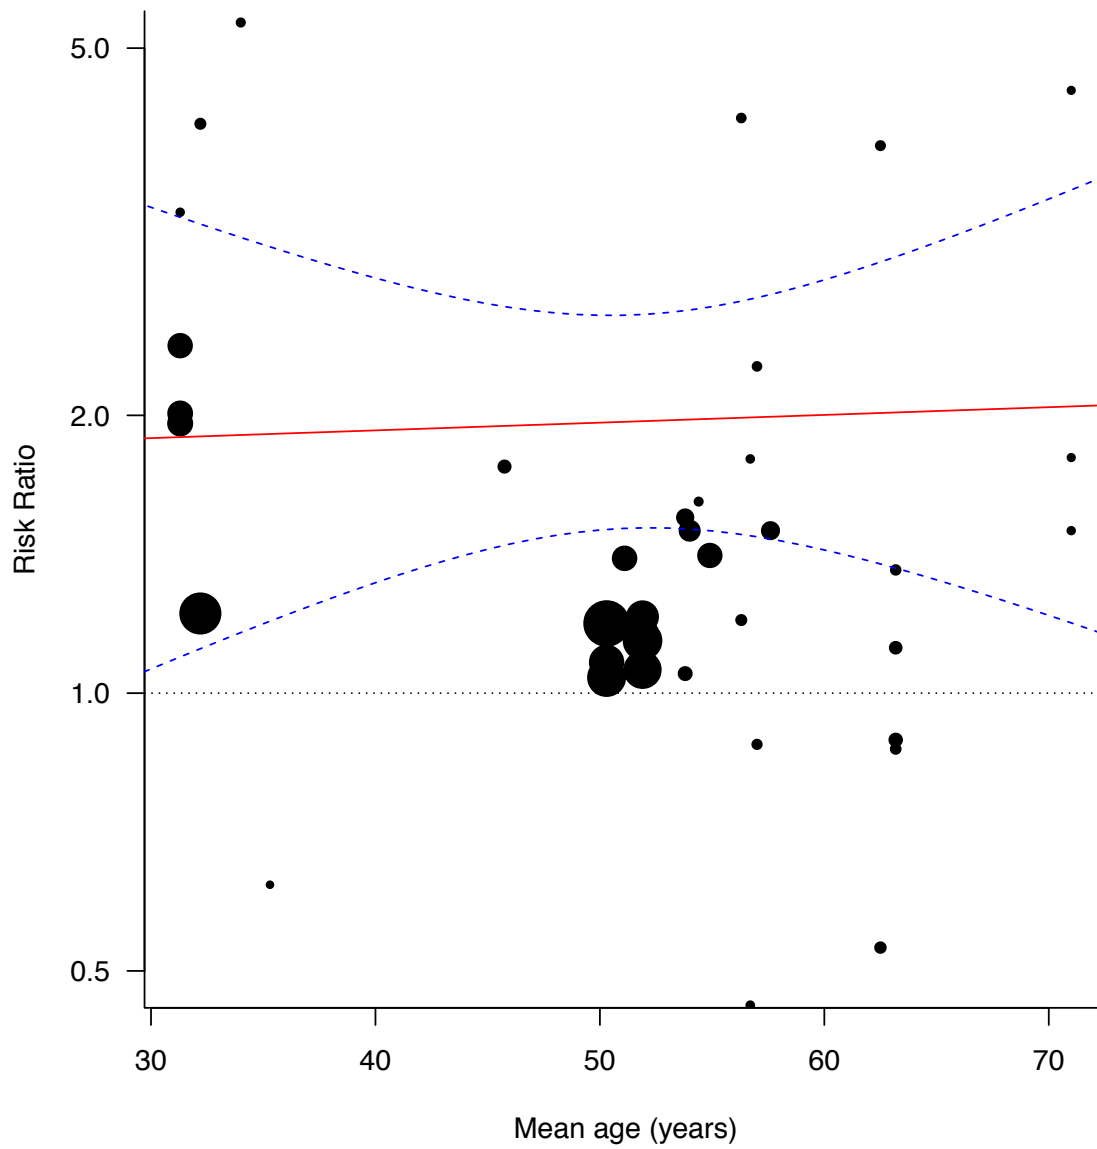

**Figure S4: Meta-regression for Asthma by mean age**

(P value for interaction = 0.537)

\*size of each dot represents the weight of each risk estimate using the inverse-variance method.

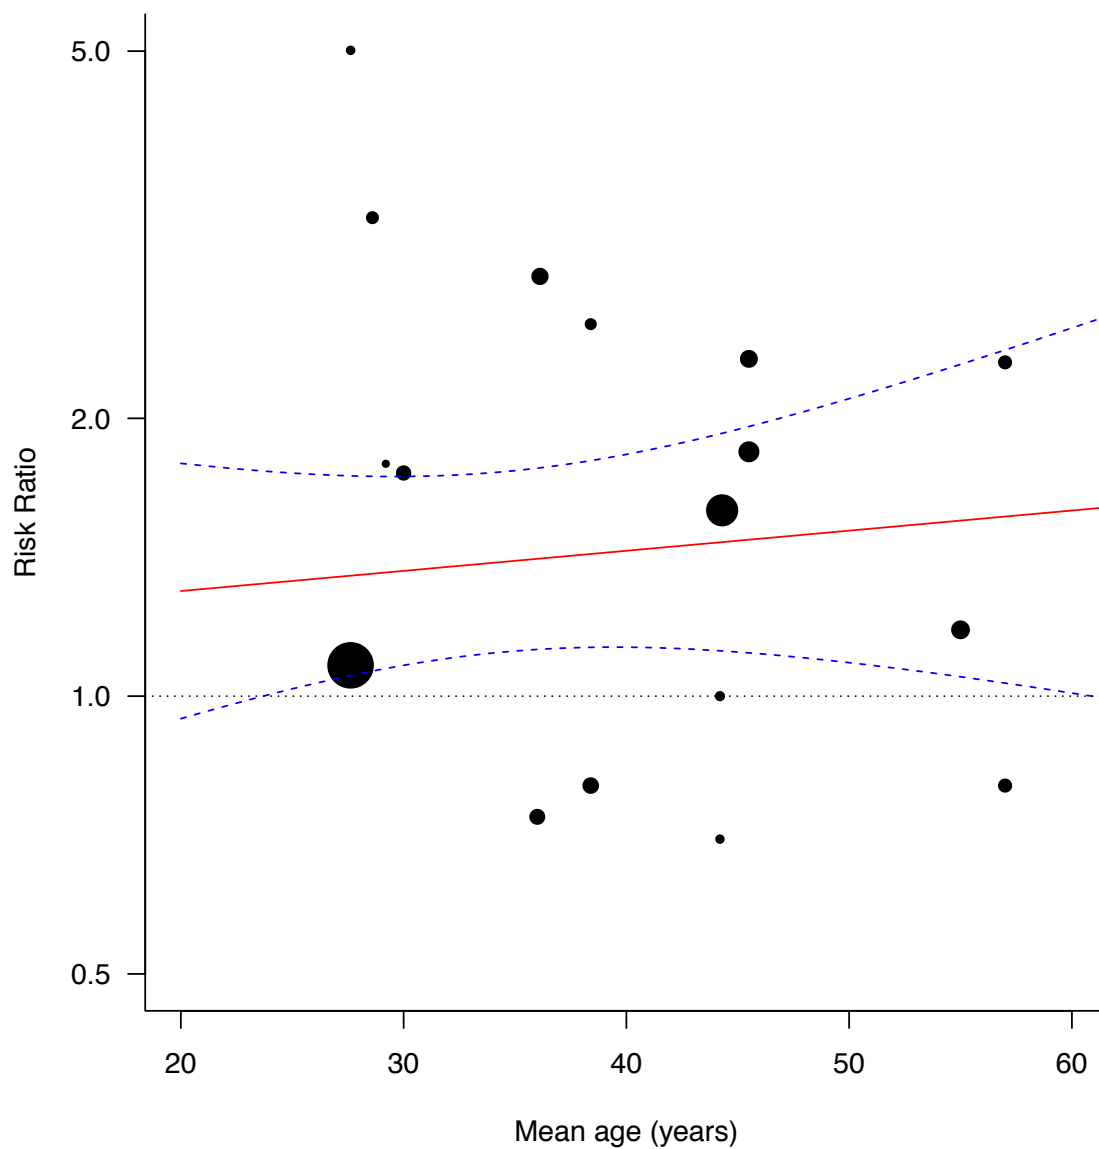

**Figure S5: Meta-regression for Tuberculosis by mean age**

(P value for interaction = 0.289)

\*size of each dot represents the weight of each risk estimate using the inverse-variance method.

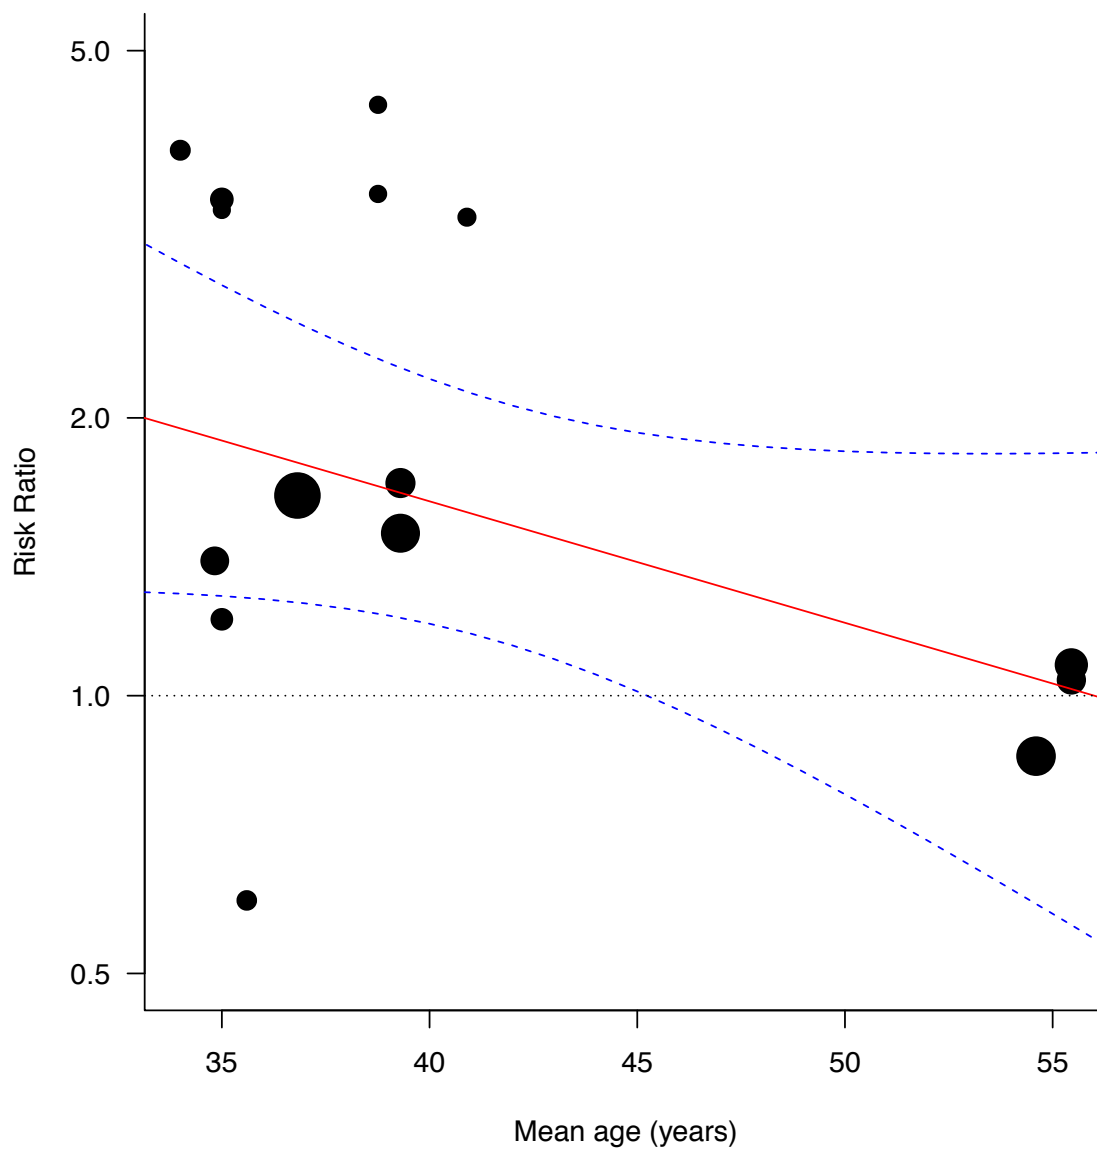

**Figure S6: Meta-regression for lung cancer by mean age**

(P value for interaction = 0.666)

\*size of each dot represents the weight of each risk estimate using the inverse-variance method.

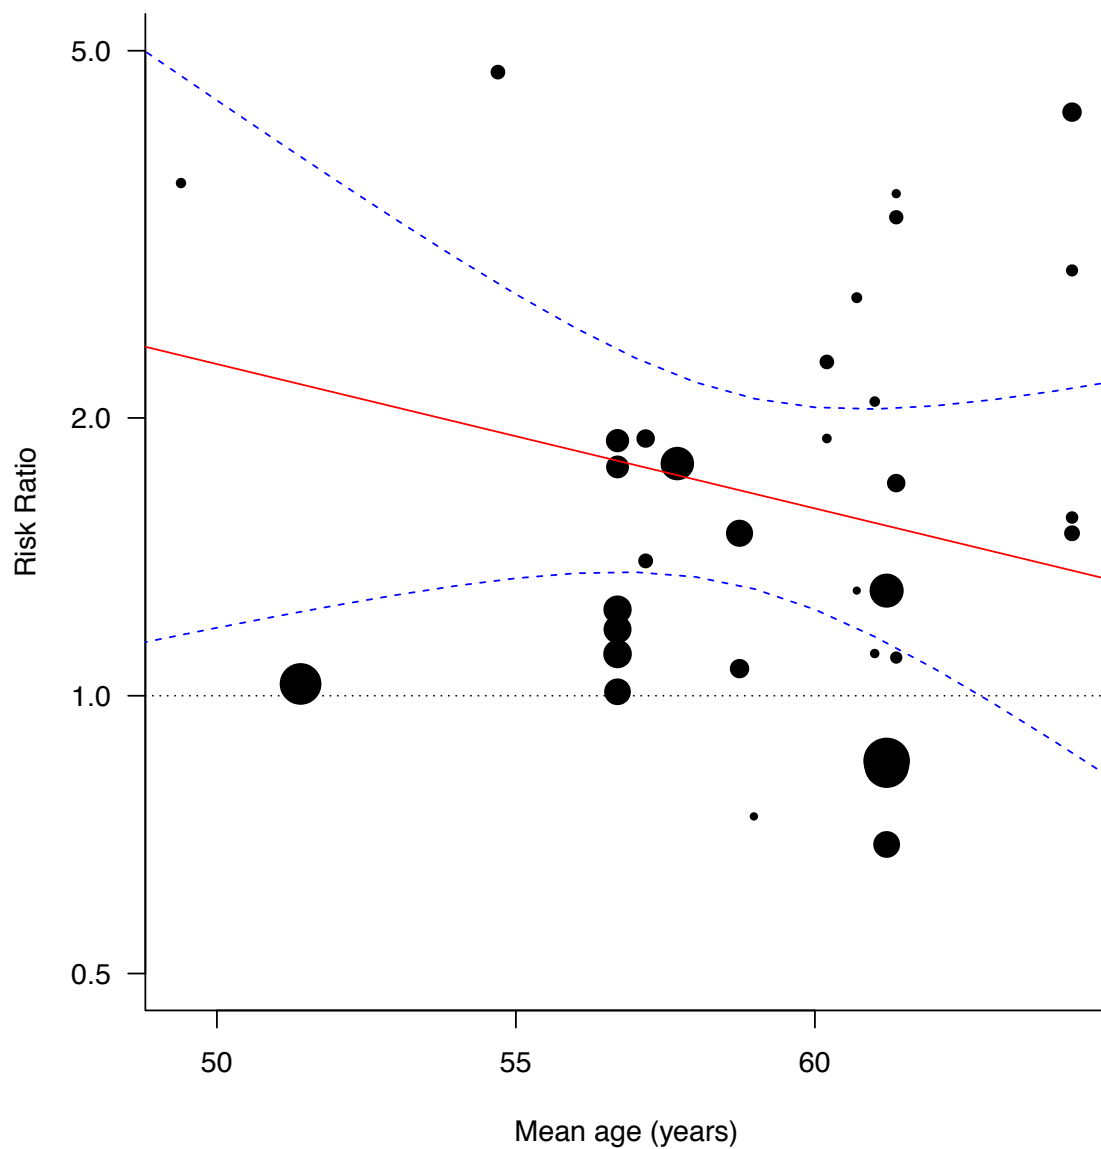

**Figure S7: Meta-regression for cardiovascular disease by mean age**

(P value for interaction = 0.844)

\*size of each dot represents the weight of each risk estimate using the inverse-variance method.

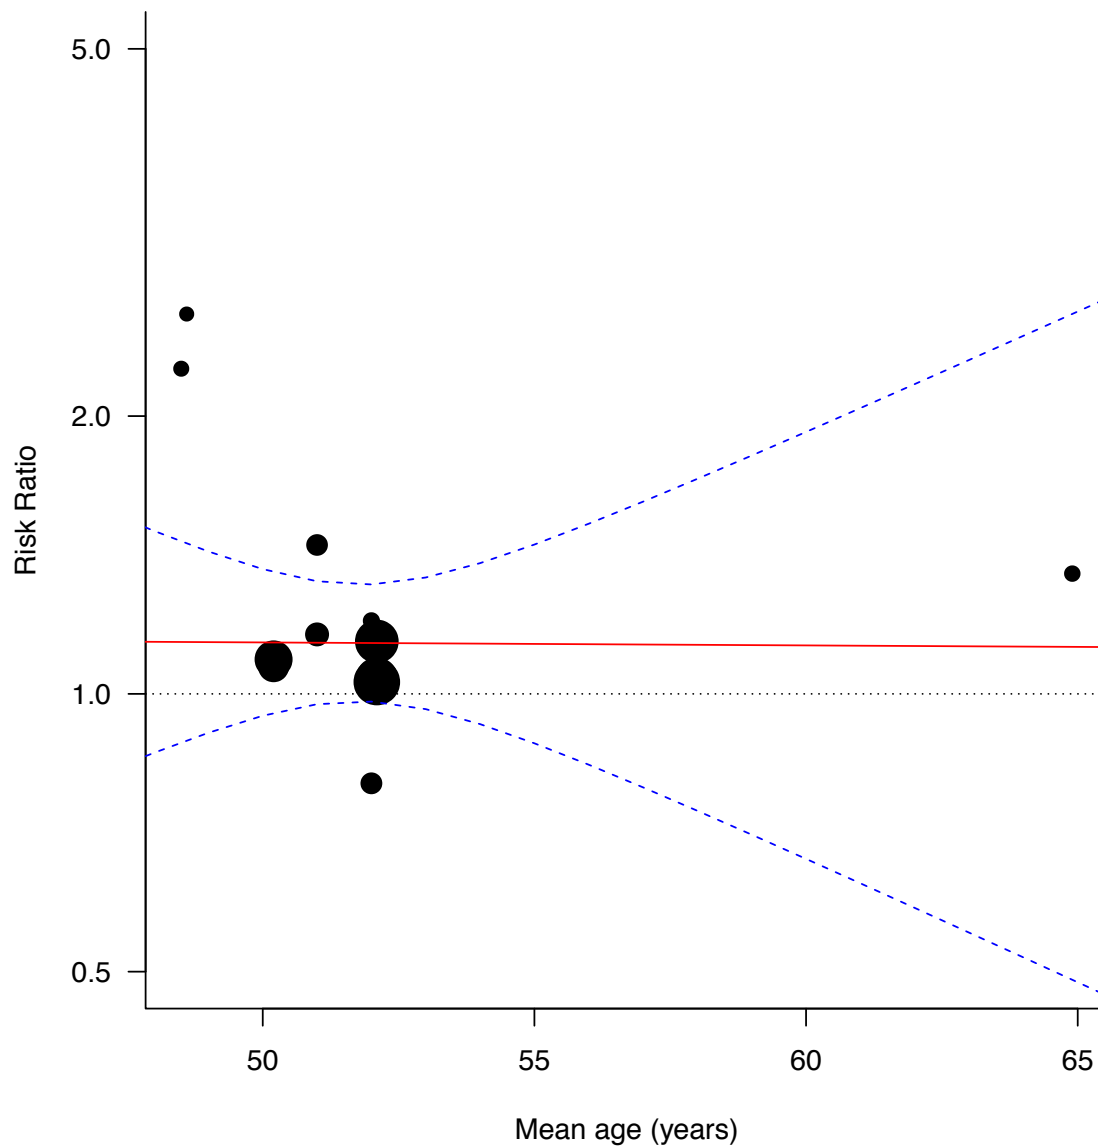

**Figure S8: Pooled risk ratios for cardiorespiratory conditions associated with use of polluting fuels and technologies stratified by gender**

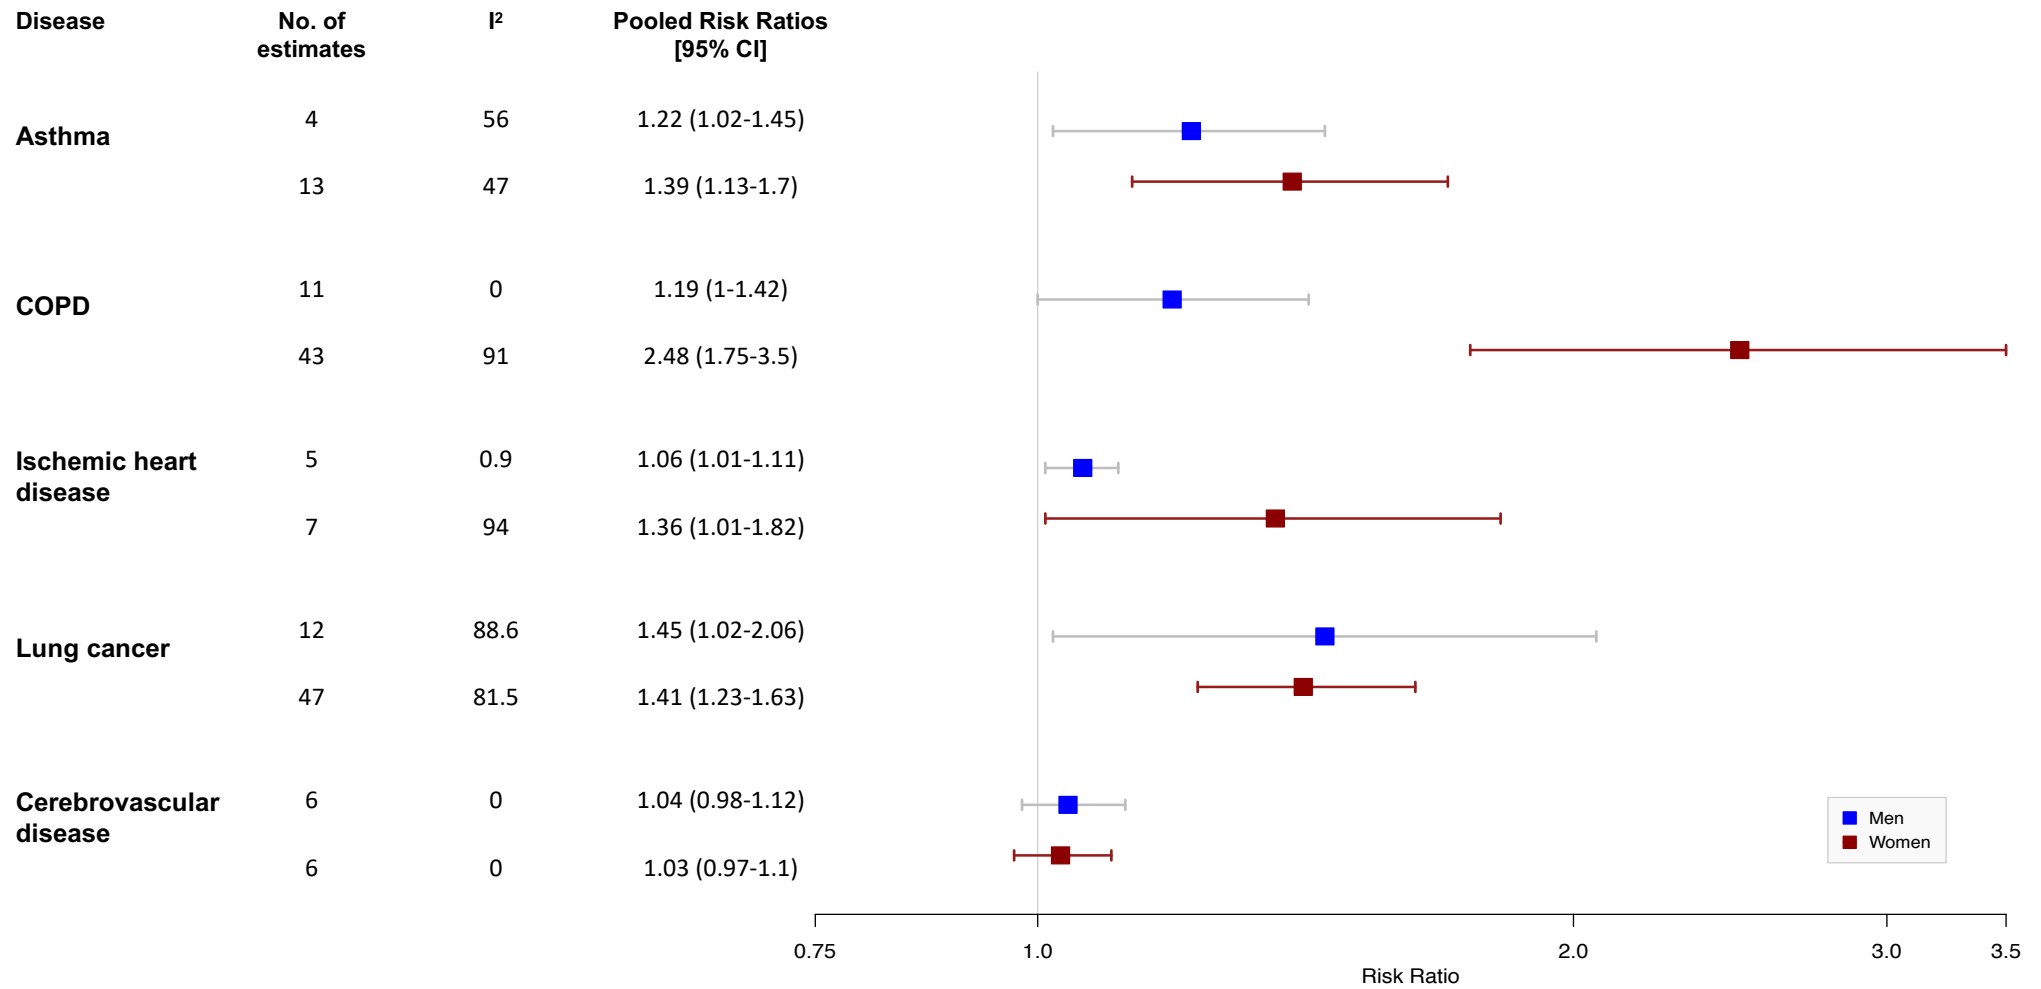

**Figure S9: Flow diagram of study selection**

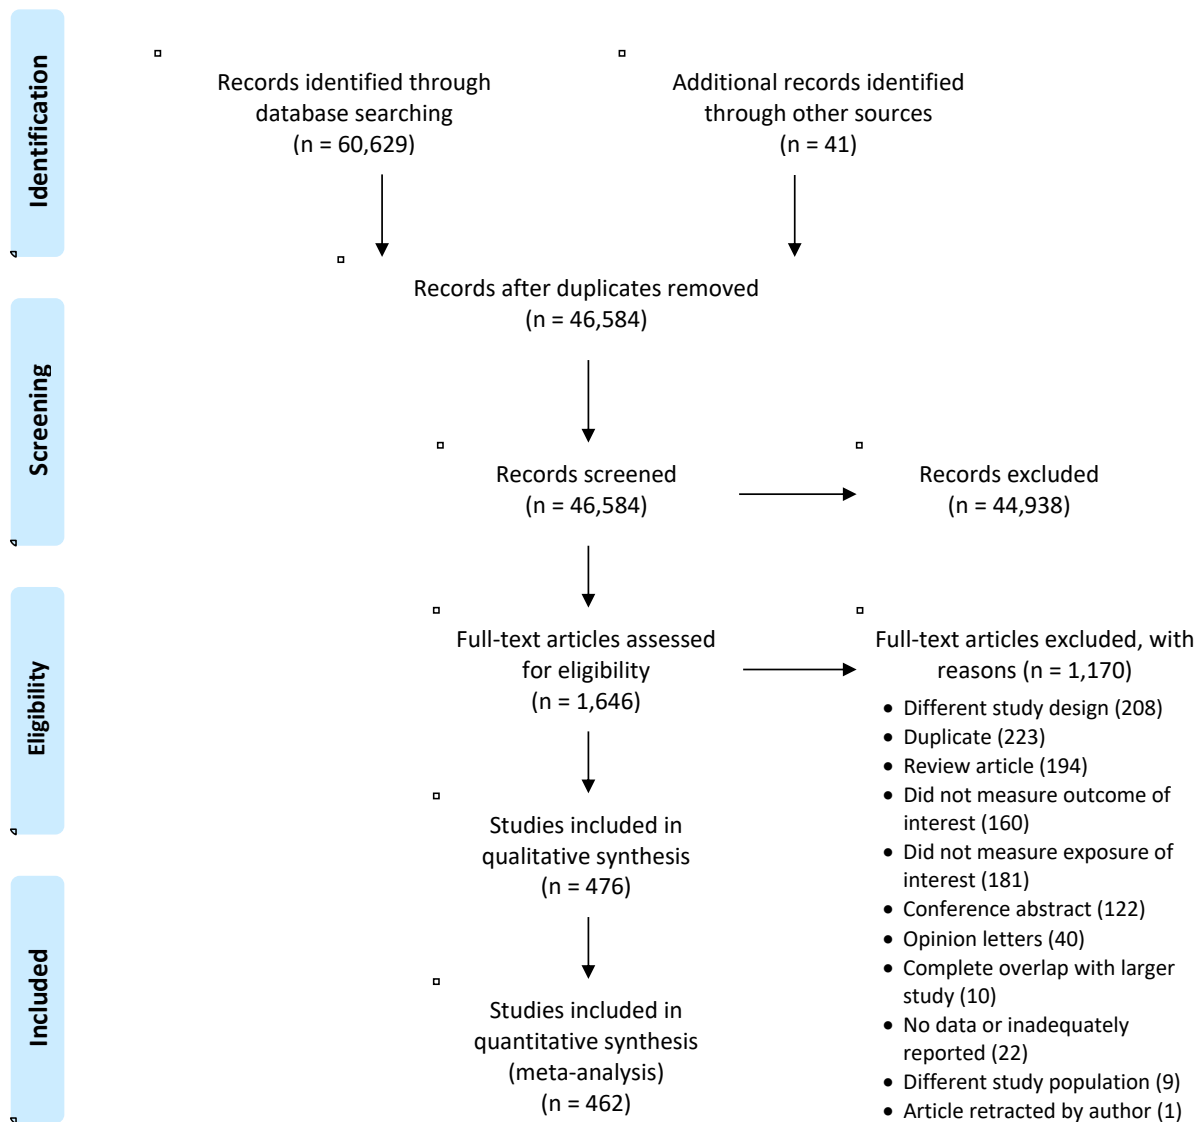

**Figure S10: Pooled risk ratio for asthma associated with use of polluting fuels and technologies**

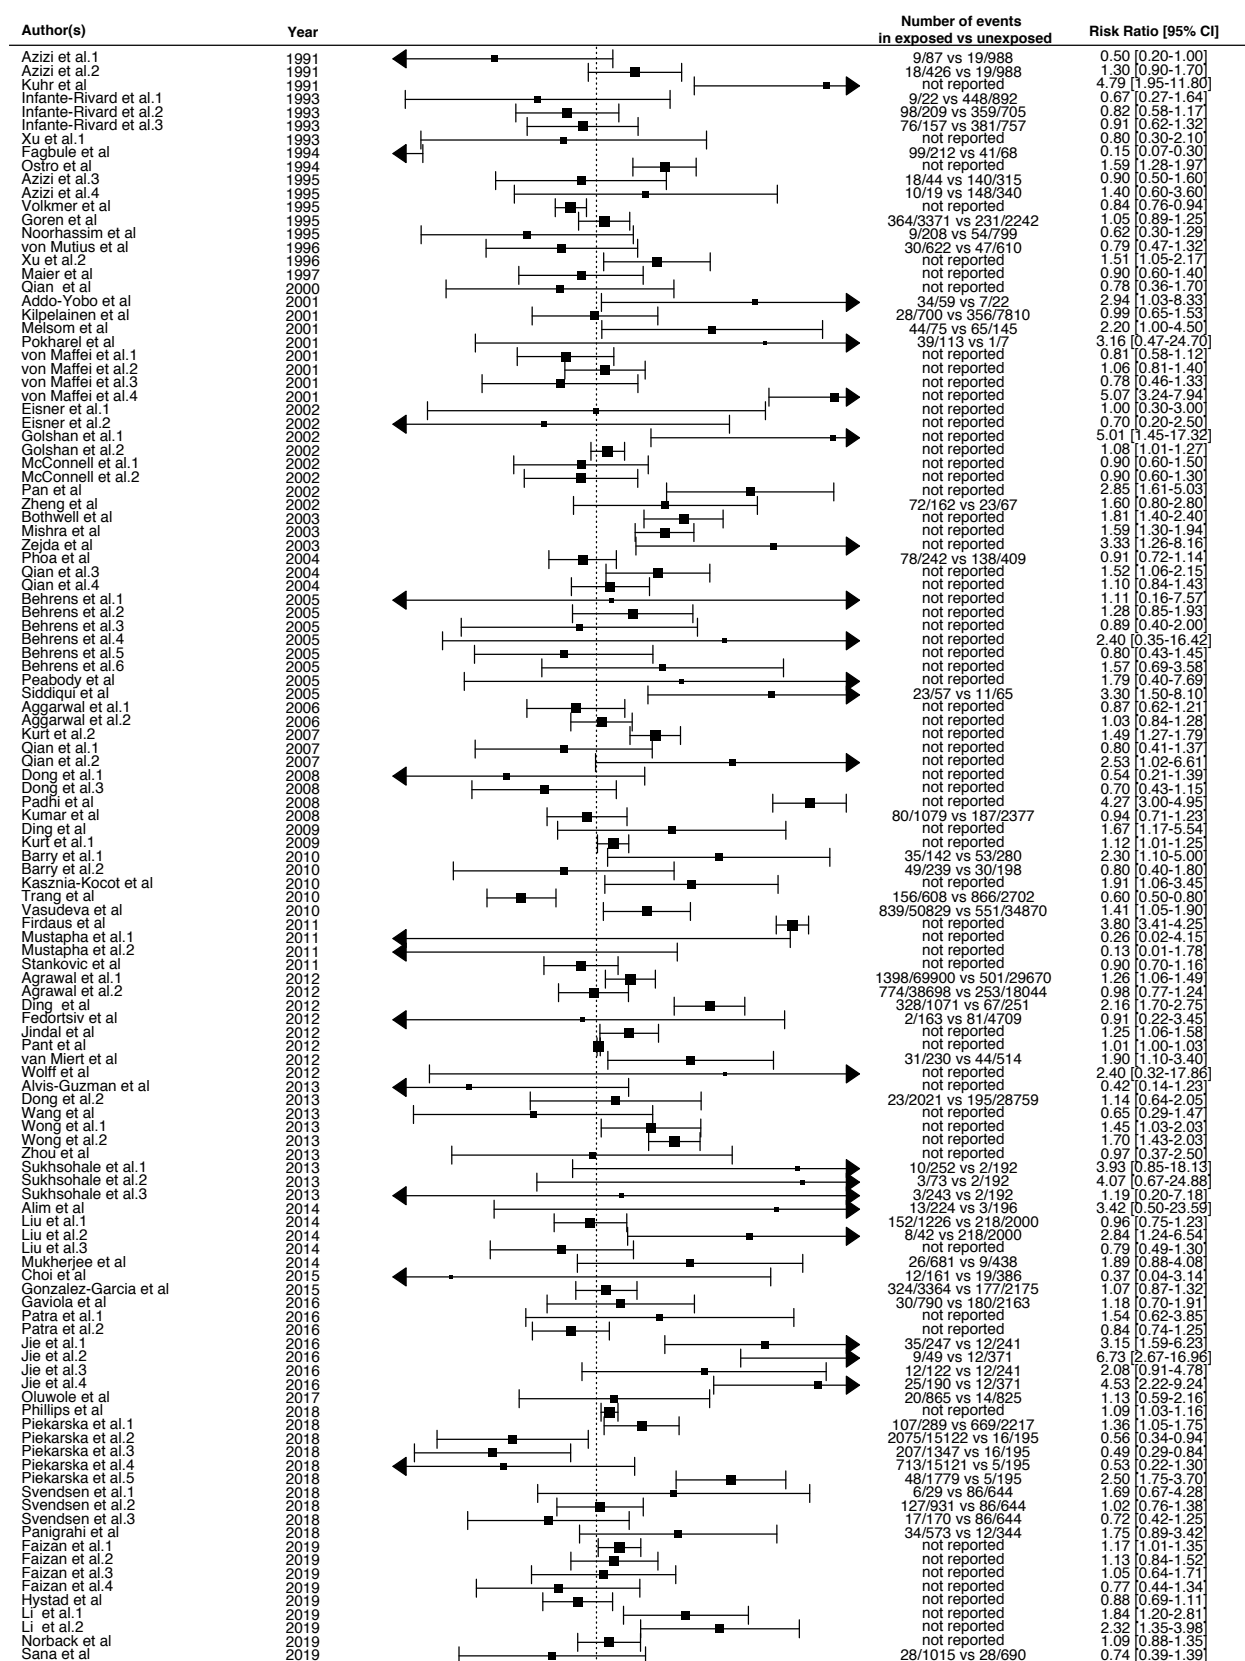

RE Model (df = 118; I<sup>2</sup> = 94.8%), Pooled risk ratio = 1.23 [95% CI 1.11 - 1.36]

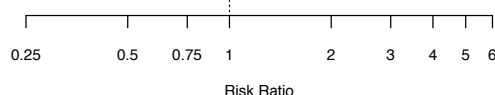



**Figure S11: Pooled risk ratio for chronic obstructive pulmonary disease associated with use of polluting fuels and technologies**

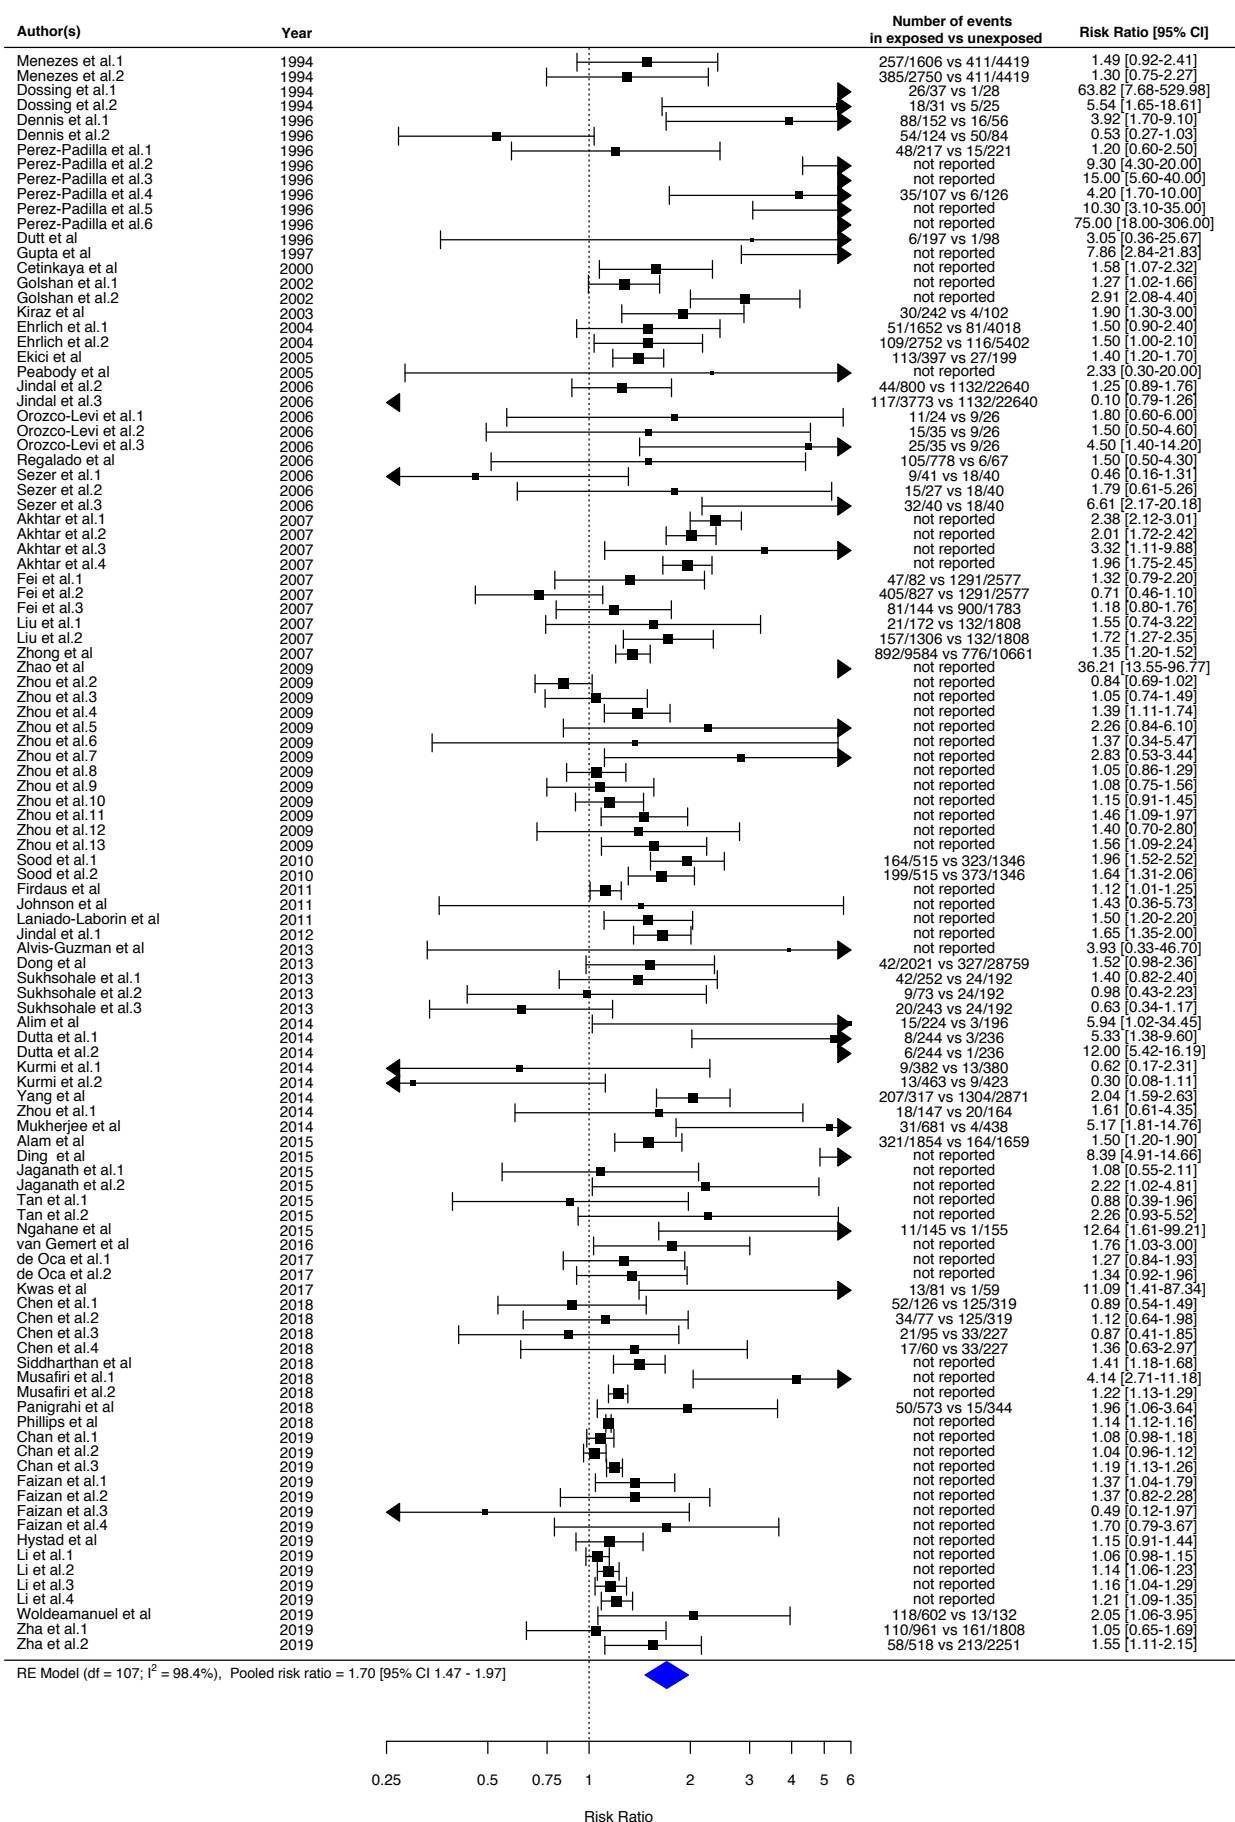

**Figure S12: Pooled risk ratio for acute respiratory infection in children associated with use of polluting fuels and technologies**

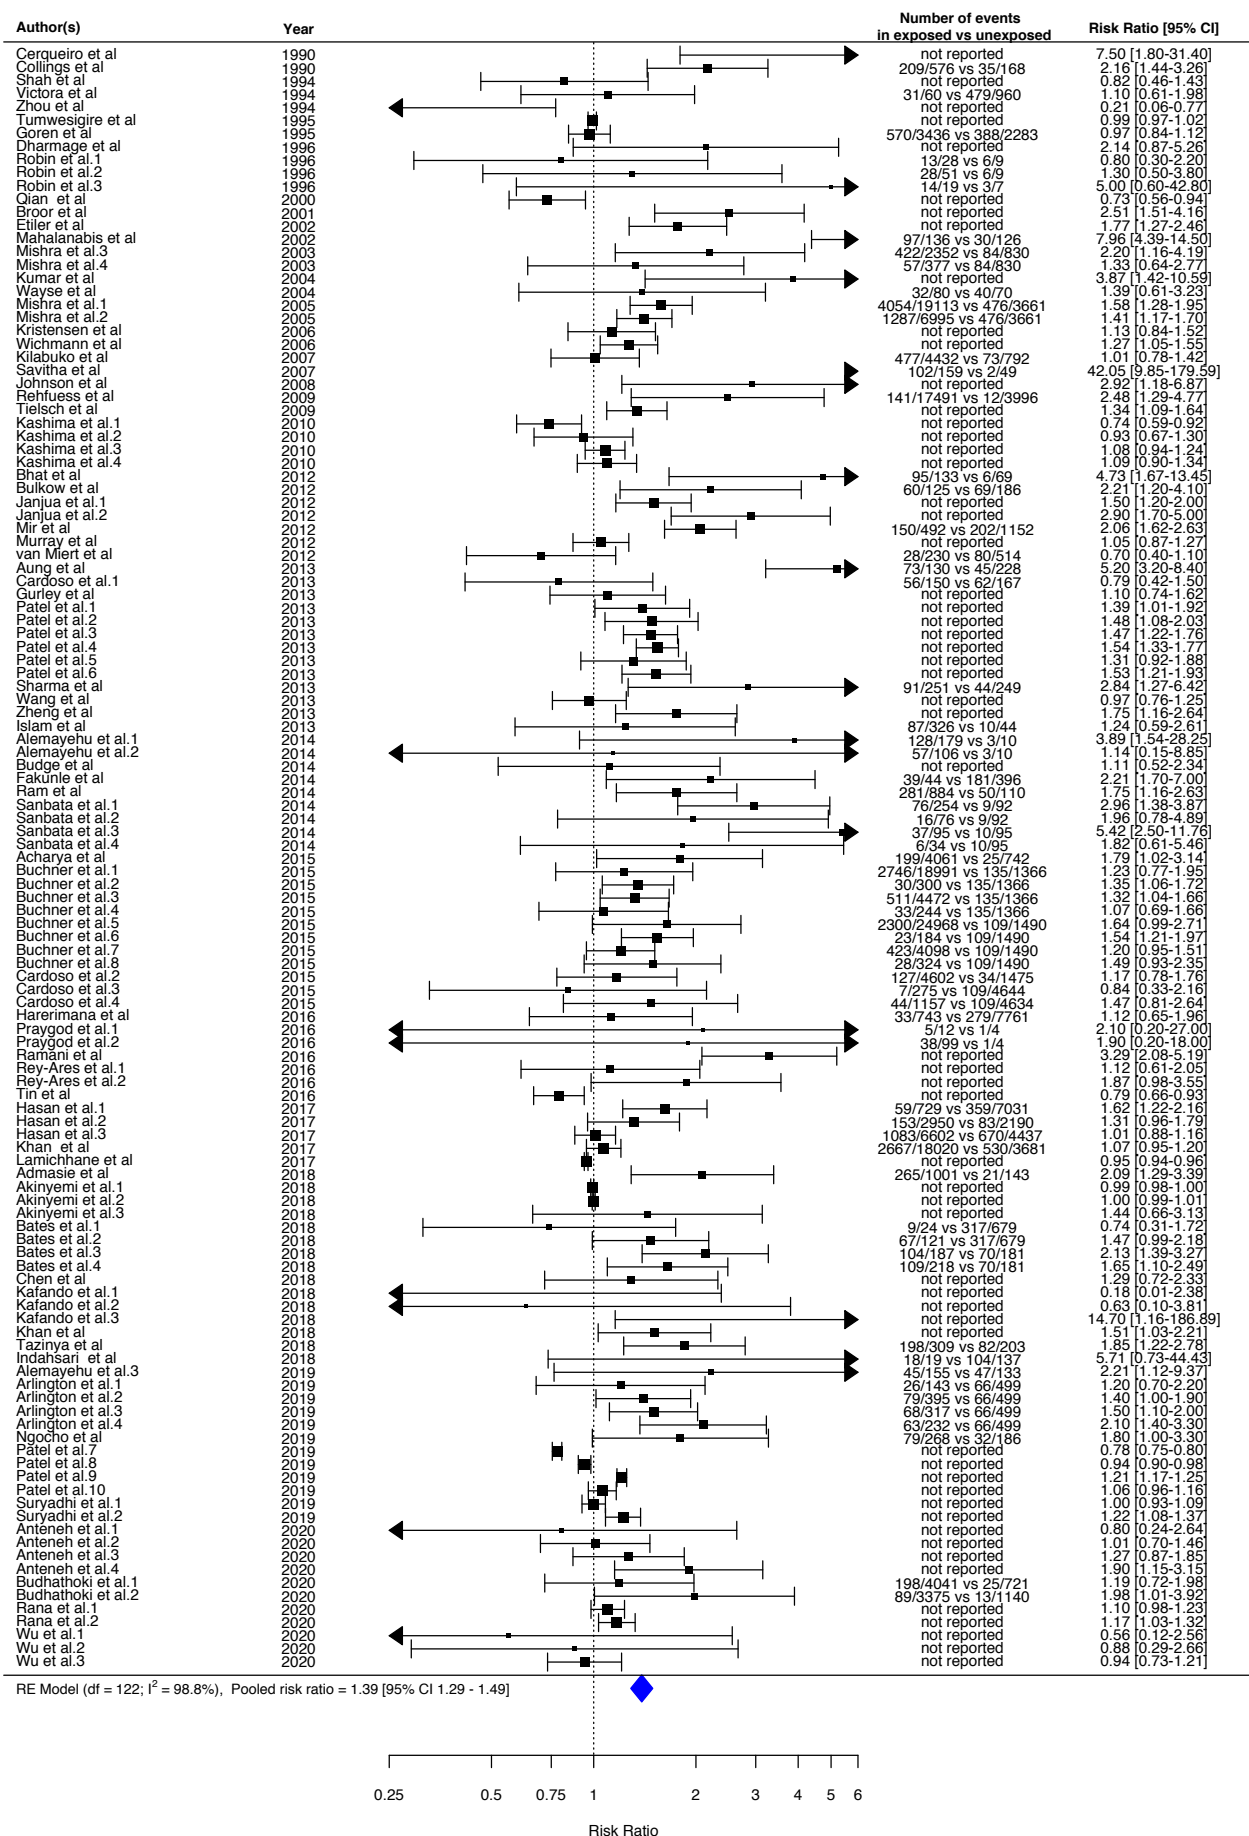

**Figure S13: Pooled risk ratio for acute respiratory infection in adults associated with use of polluting fuels and technologies**

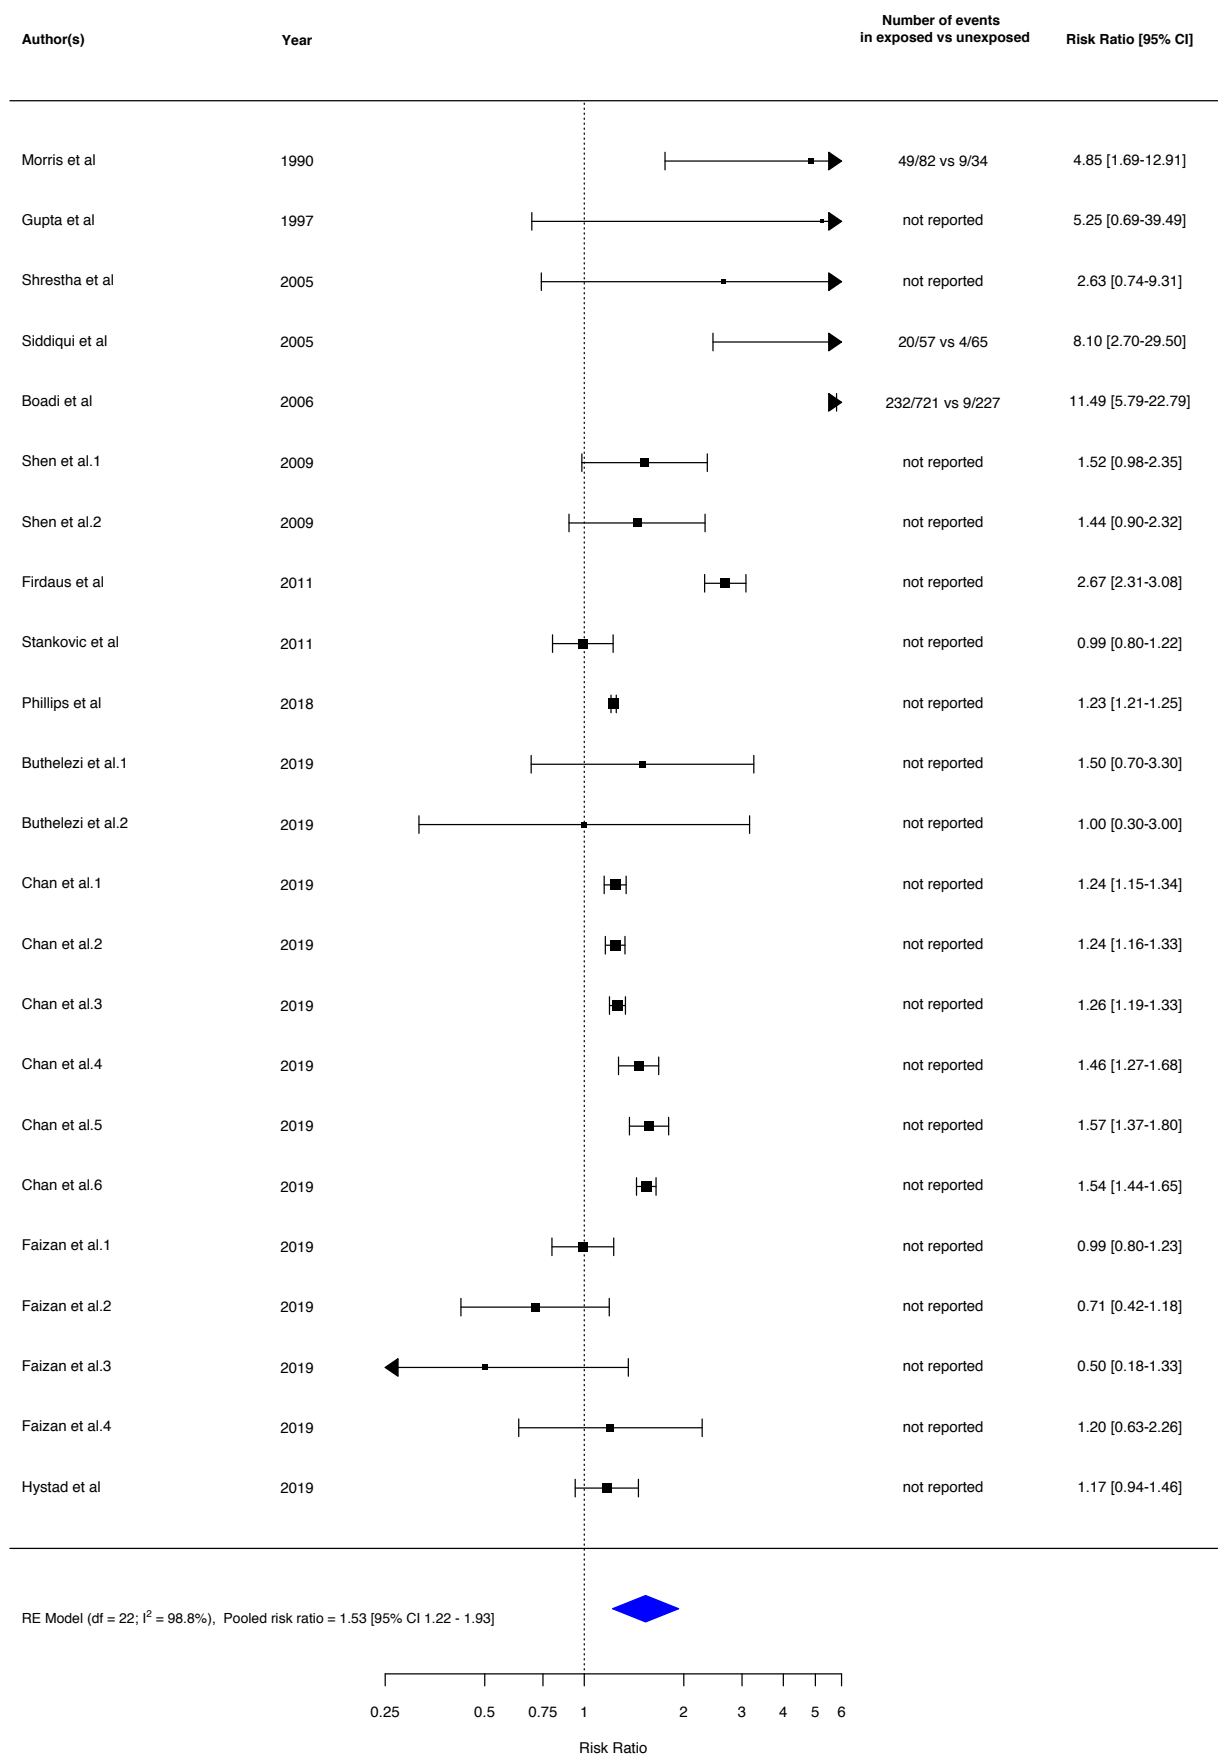

### Figure S14: Pooled risk ratio for lung cancer associated with use of polluting fuels and technologies

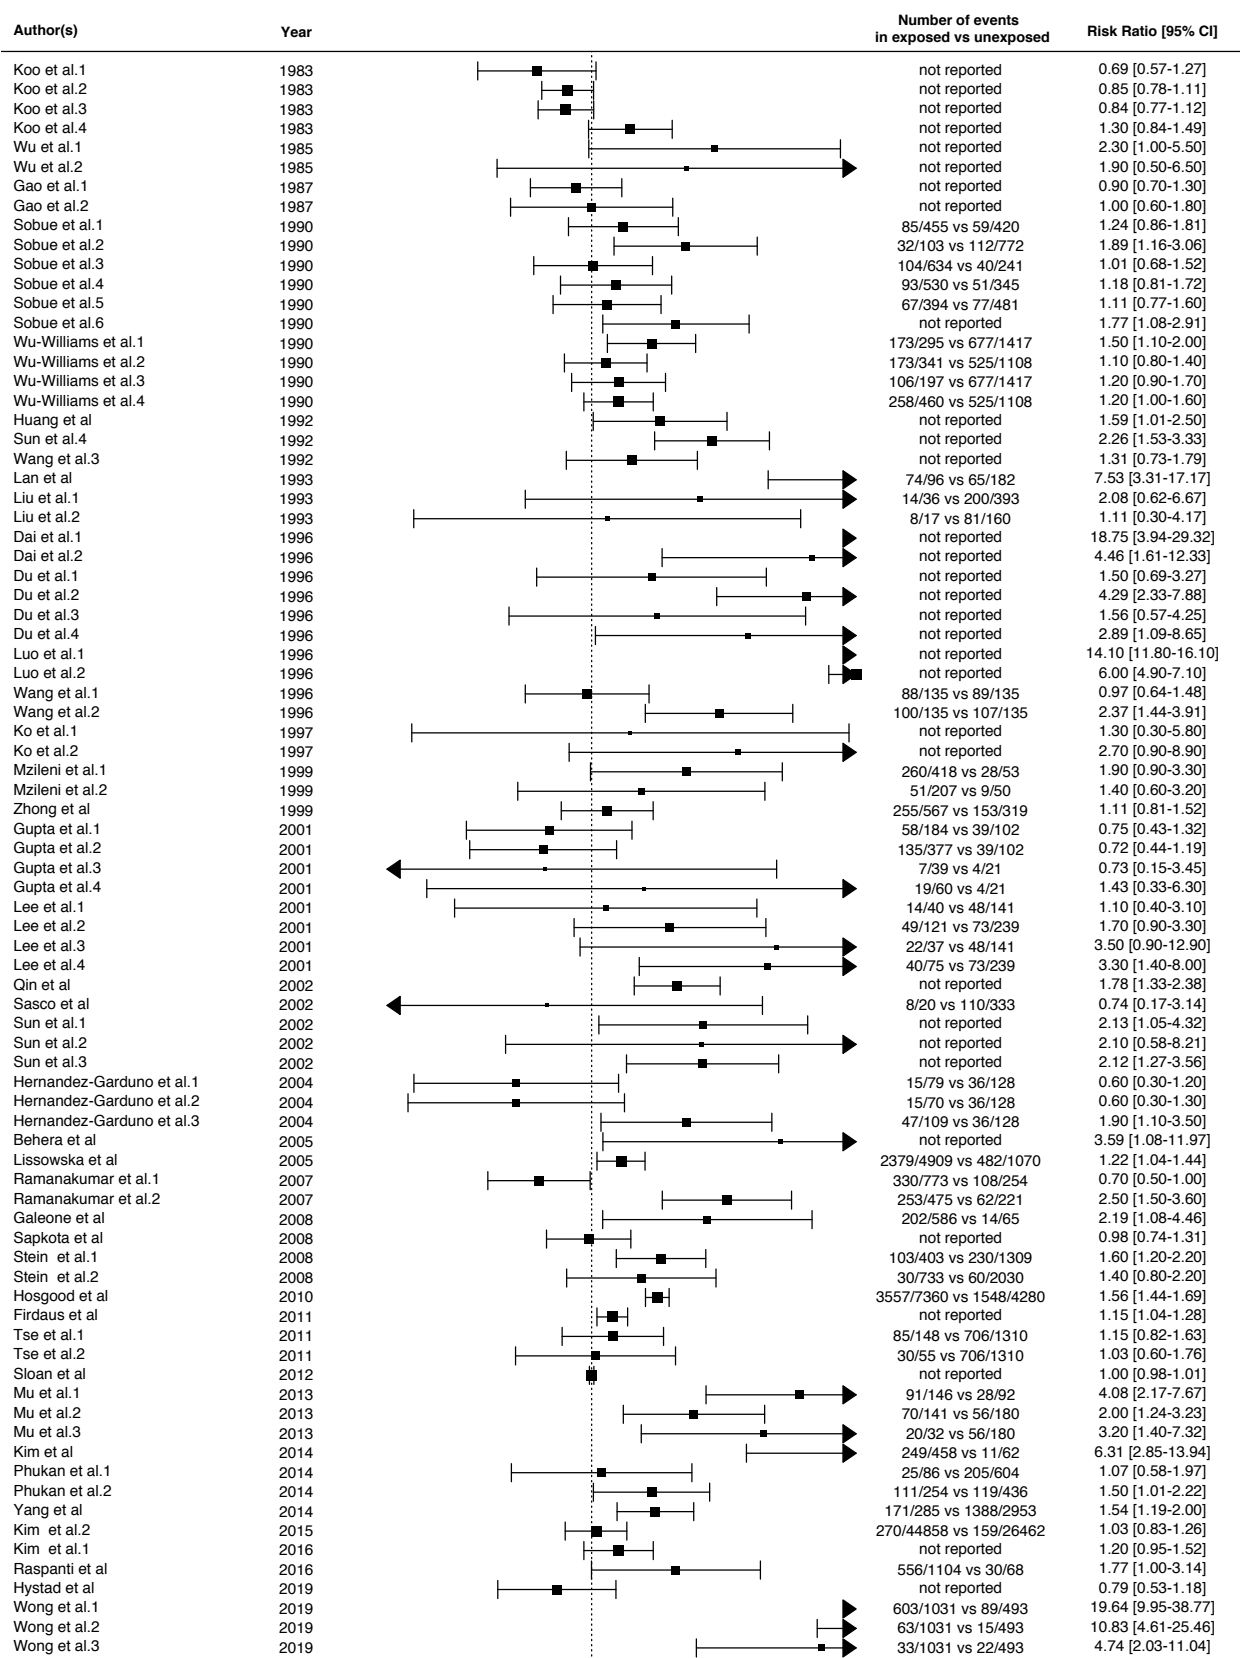

RE Model (df = 81; I<sup>2</sup> = 96.6%), Pooled risk ratio = 1.69 [95% CI 1.44 - 1.98]

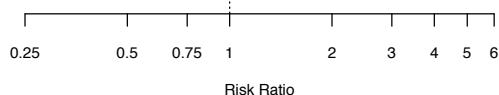

**Figure S15: Pooled risk ratio for tuberculosis associated with use of polluting fuels and technologies**

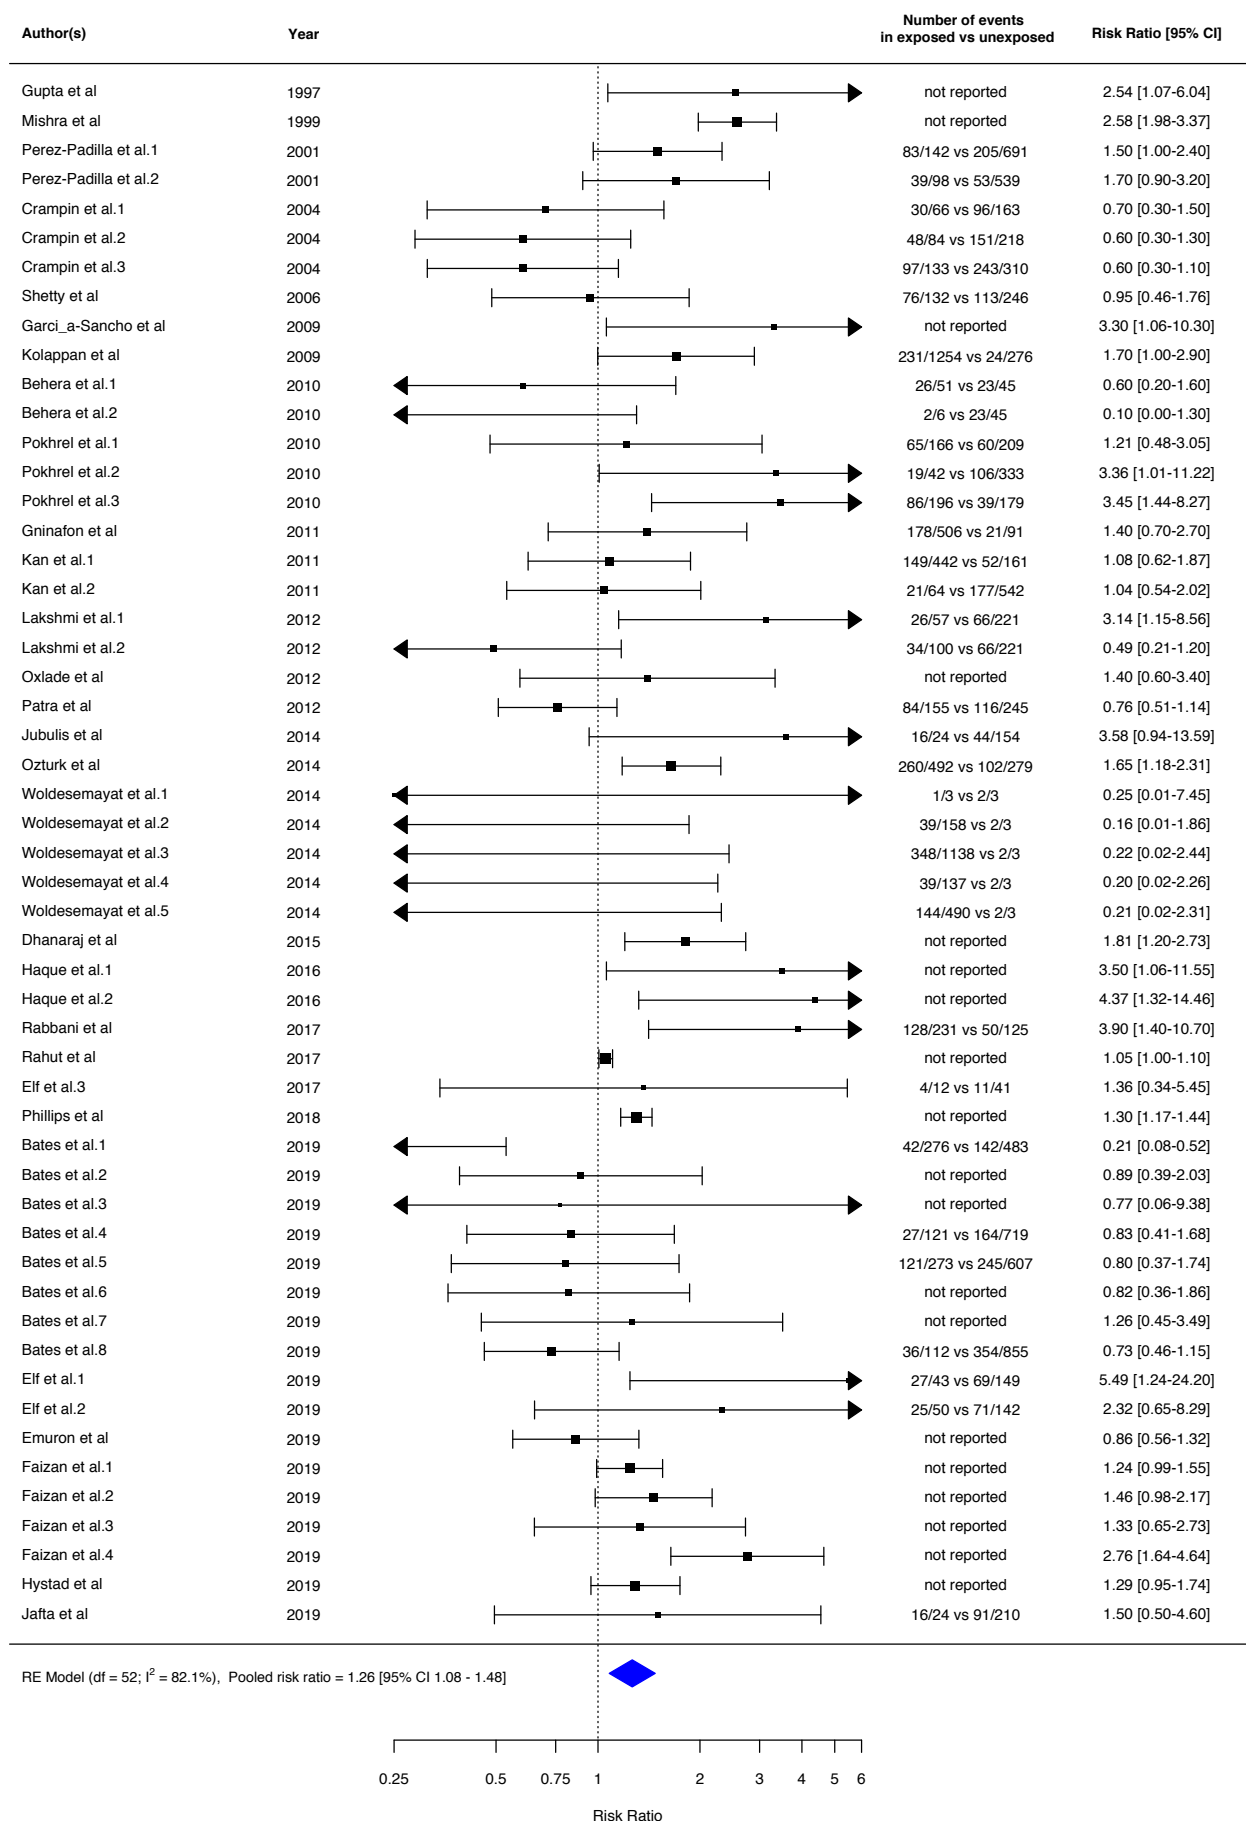

**Figure S16: Pooled risk ratio for cardiovascular disease associated with use of polluting fuels and technologies**

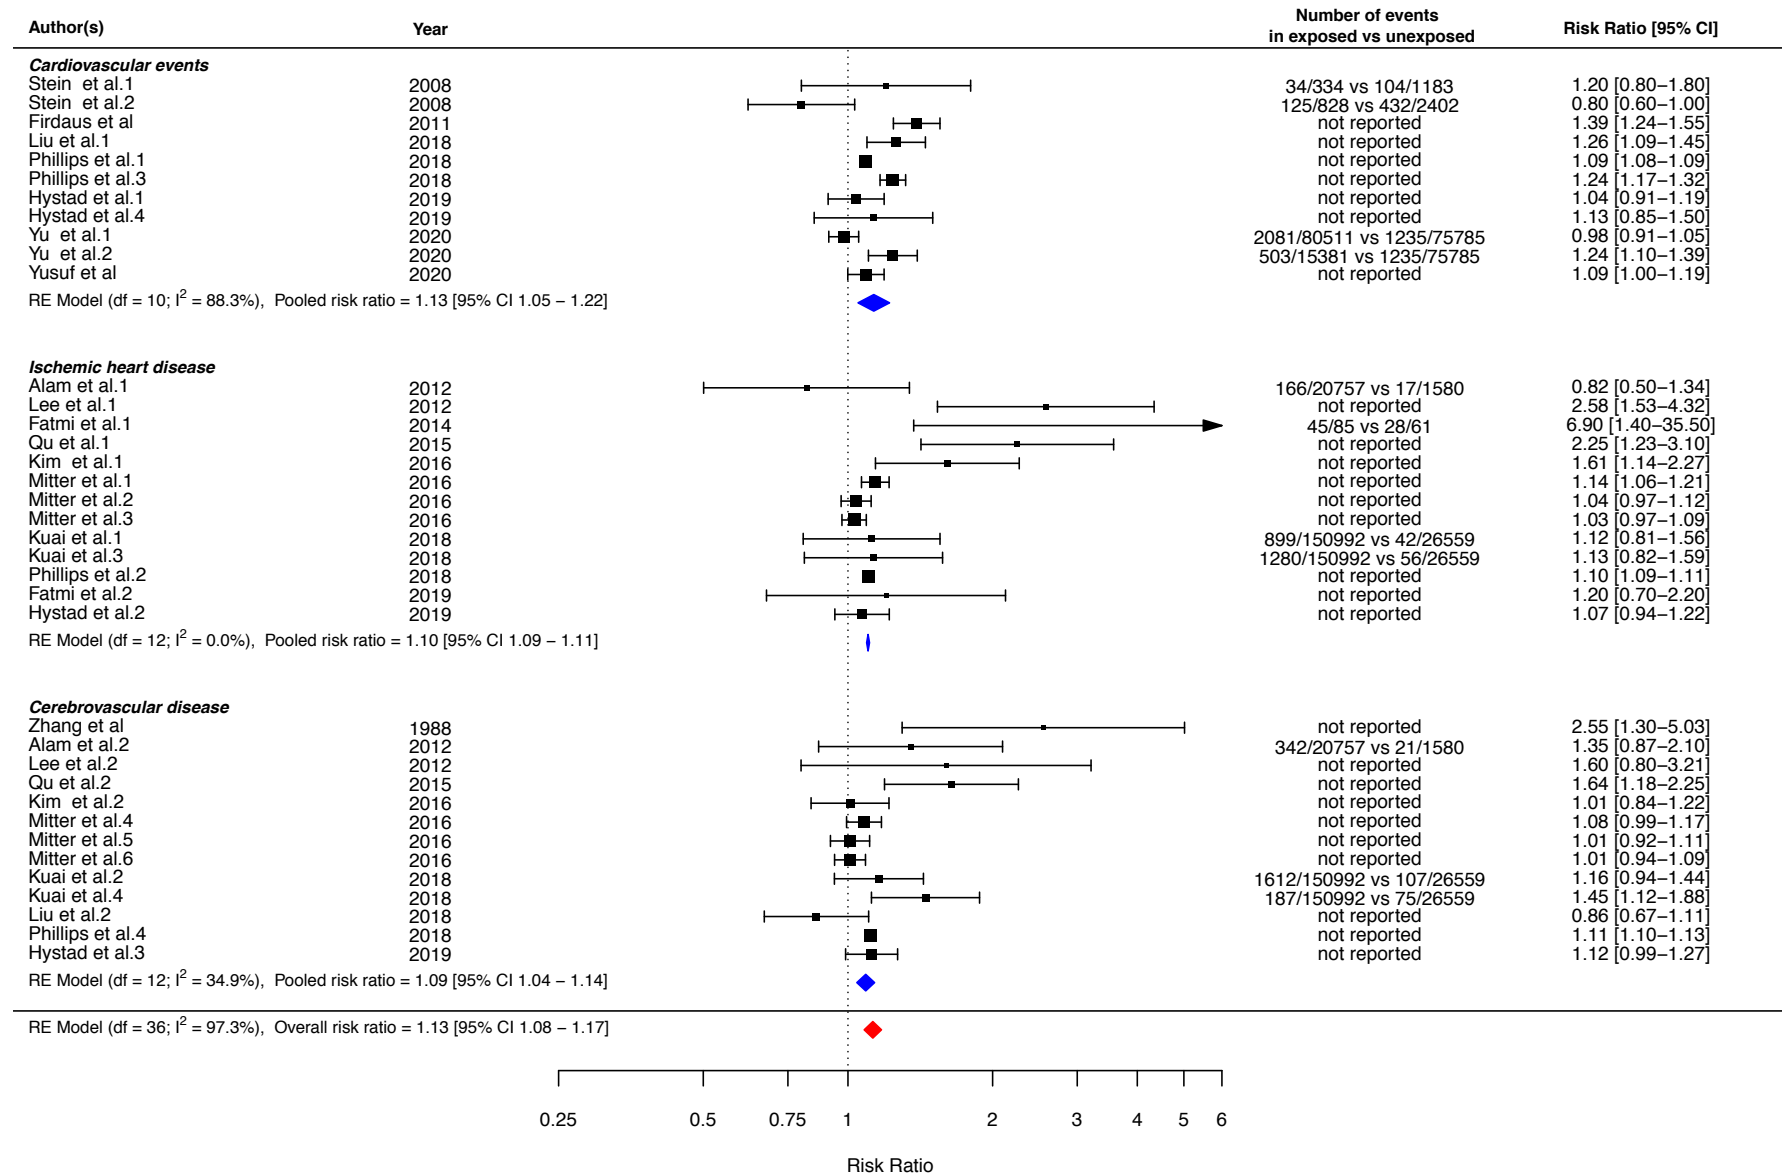

**Figure S17: Pooled risk ratio for low birthweight associated with use of polluting fuels and technologies**

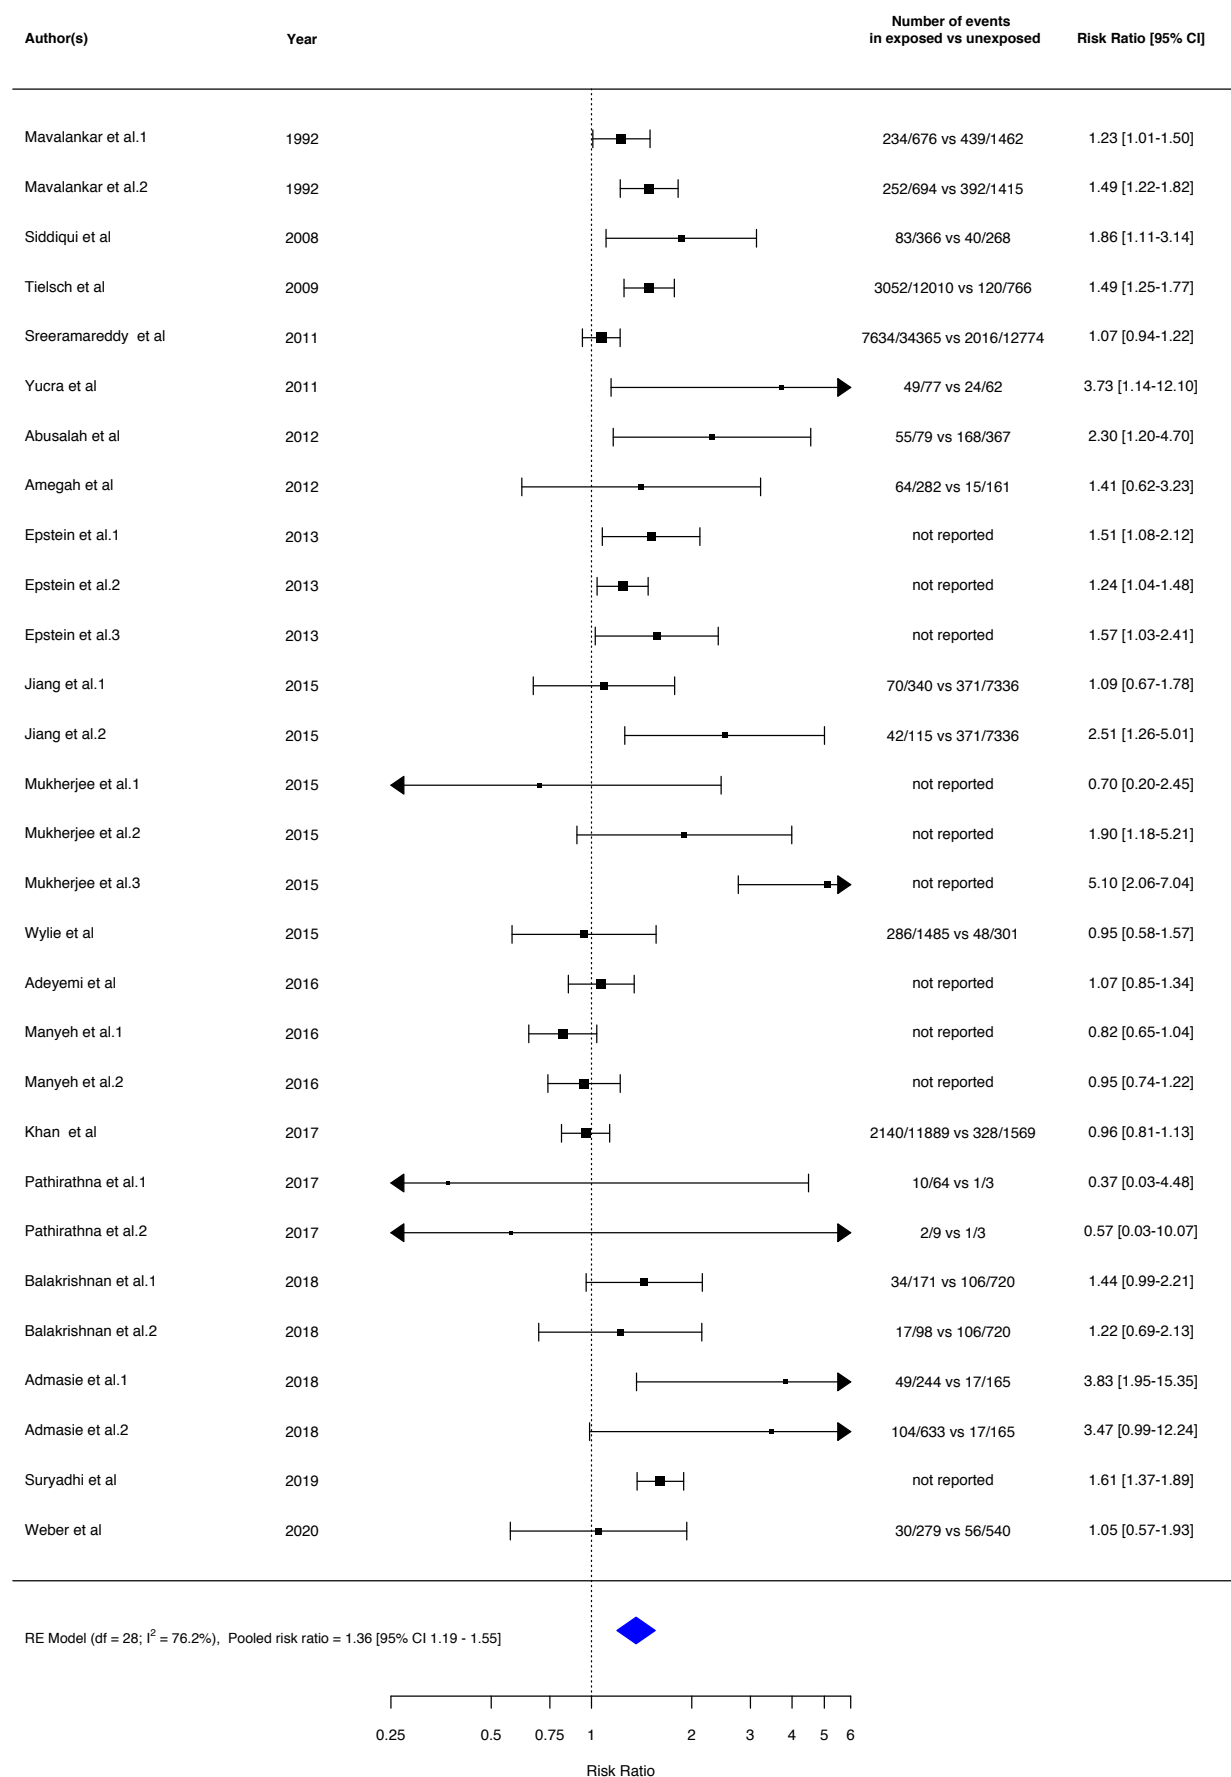

**Figure S18: Pooled risk ratio for under-five mortality associated with use of polluting fuels and technologies**

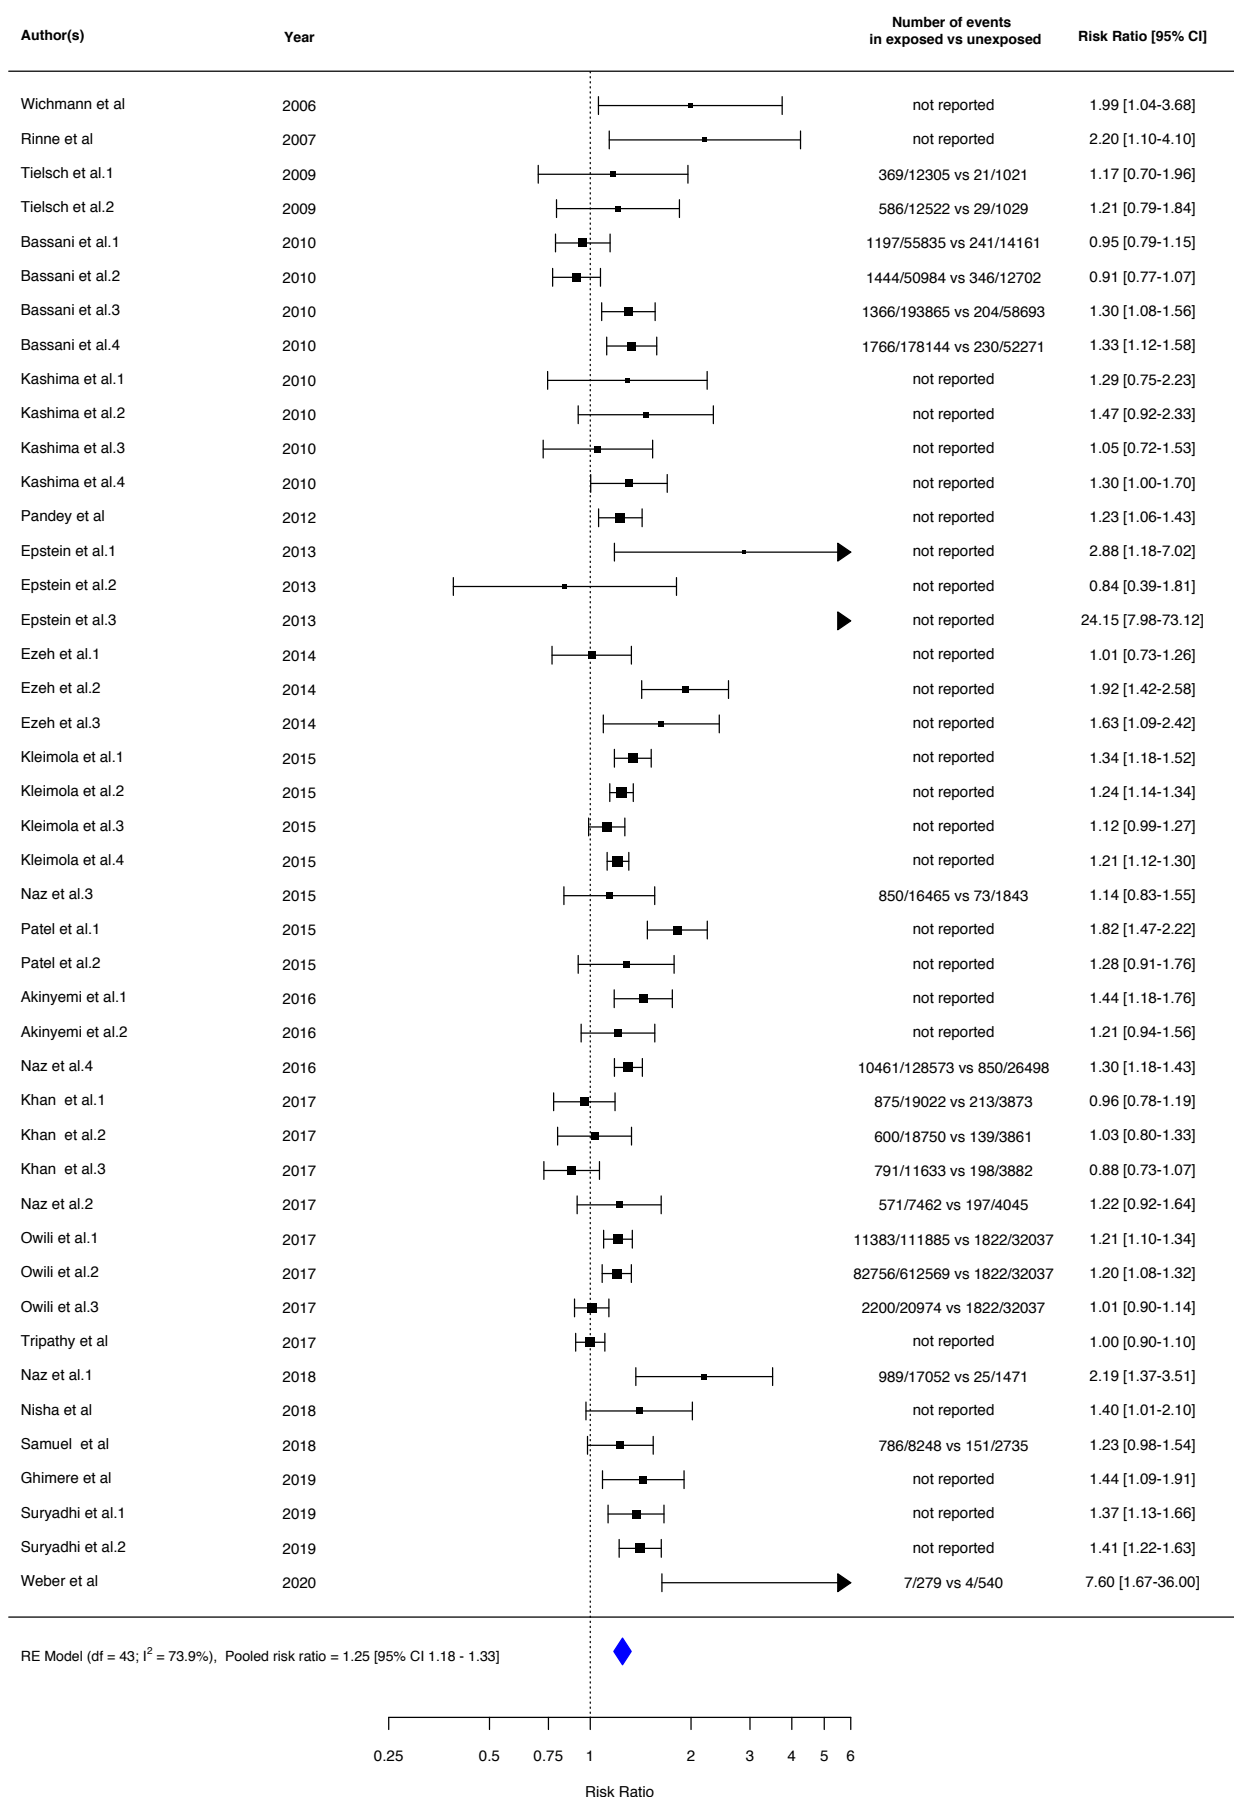



**Figure S19: Pooled risk ratio for cardiovascular mortality associated with use of polluting fuels and technologies**

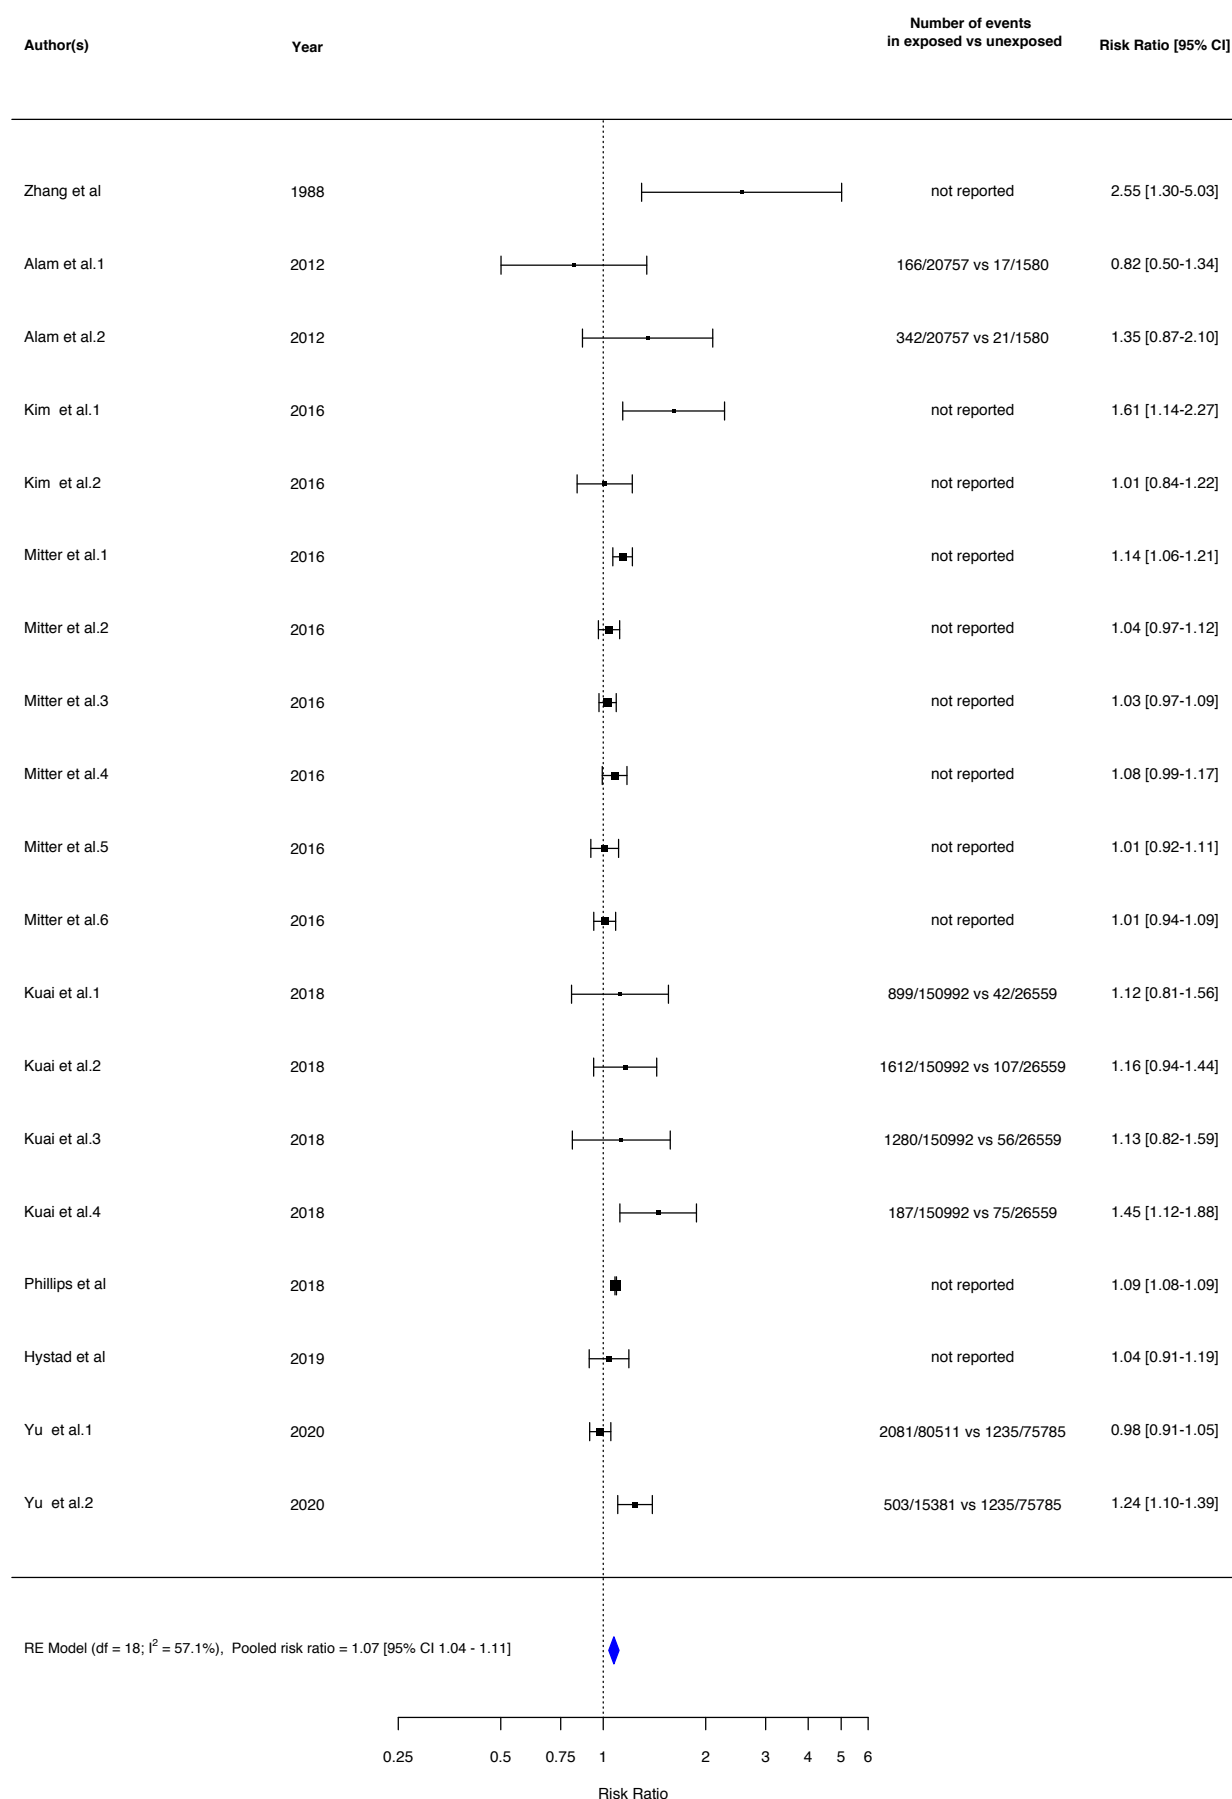

**Figure S20: Pooled risk ratio for respiratory mortality associated with use of polluting fuels and technologies**

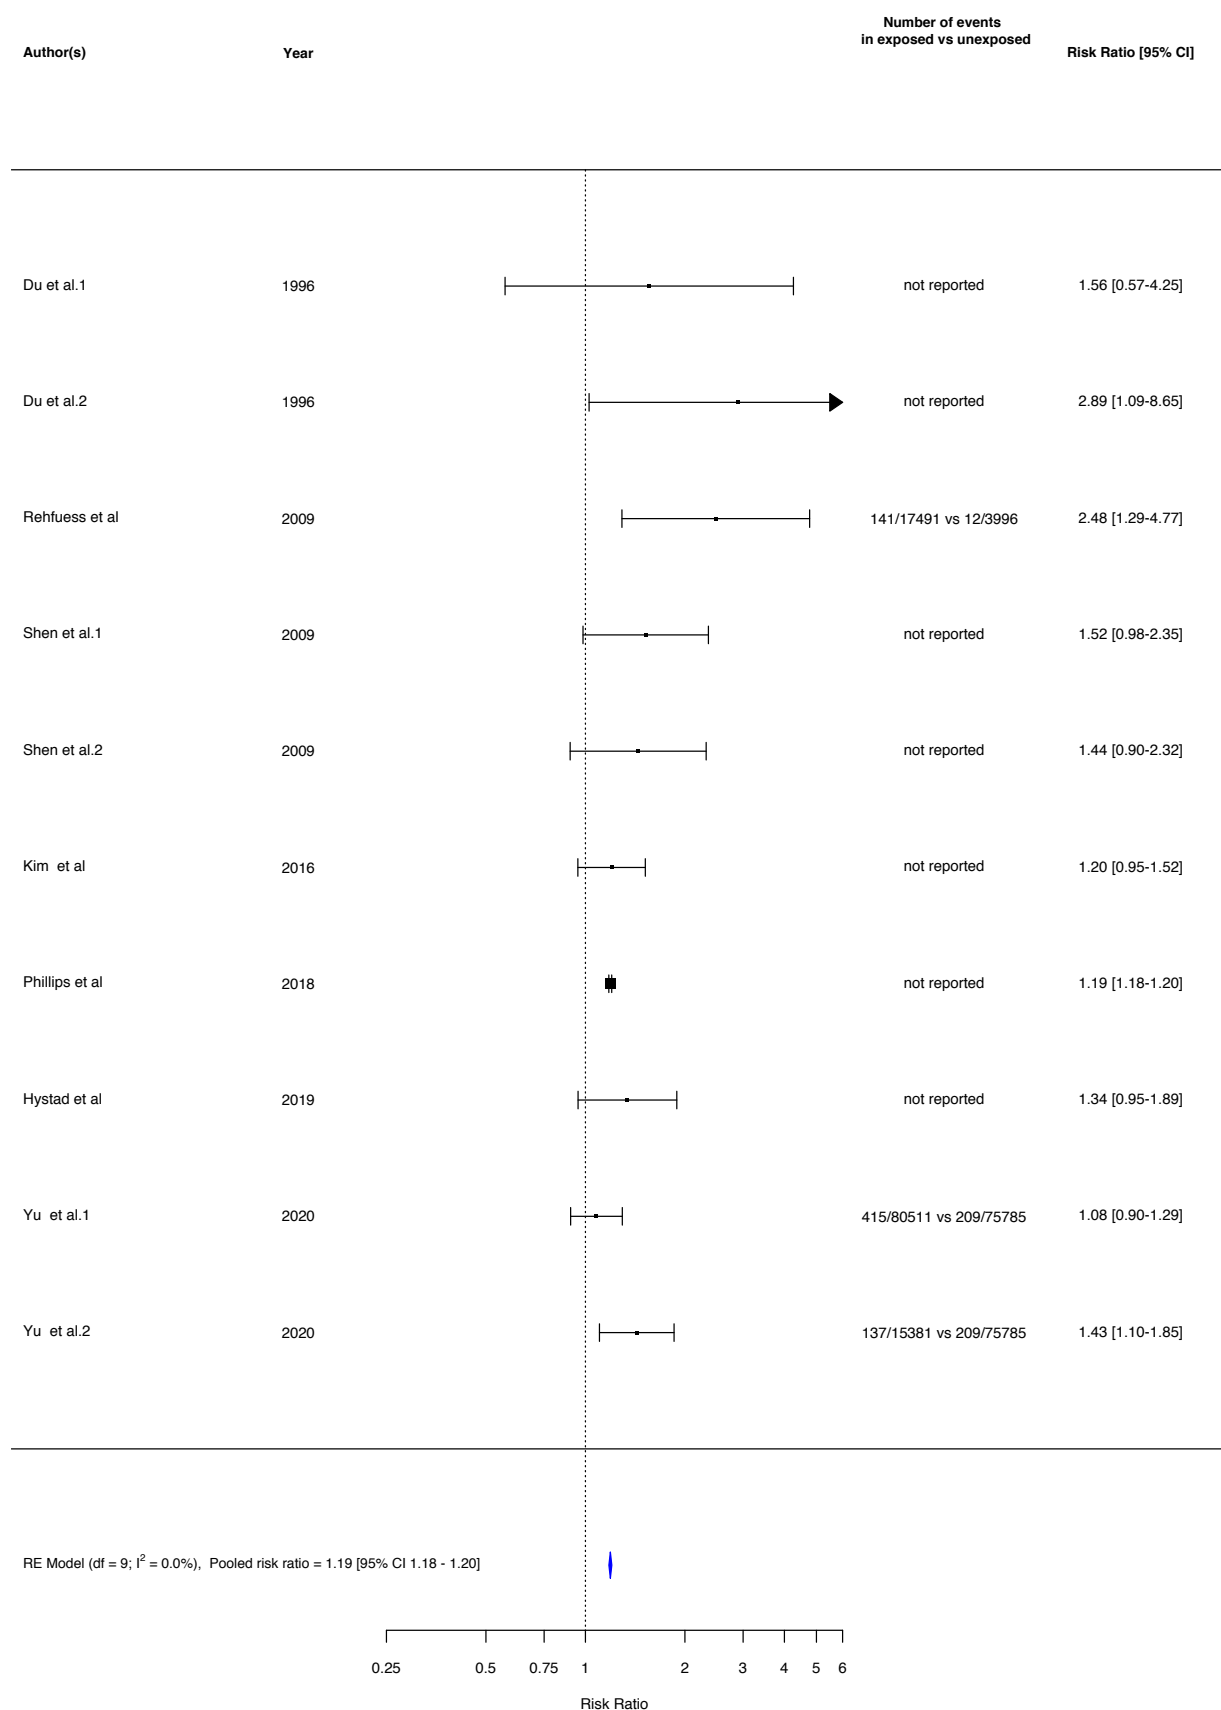

**Figure S21: Pooled risk ratio for all-cause mortality associated with use of polluting fuels and technologies**

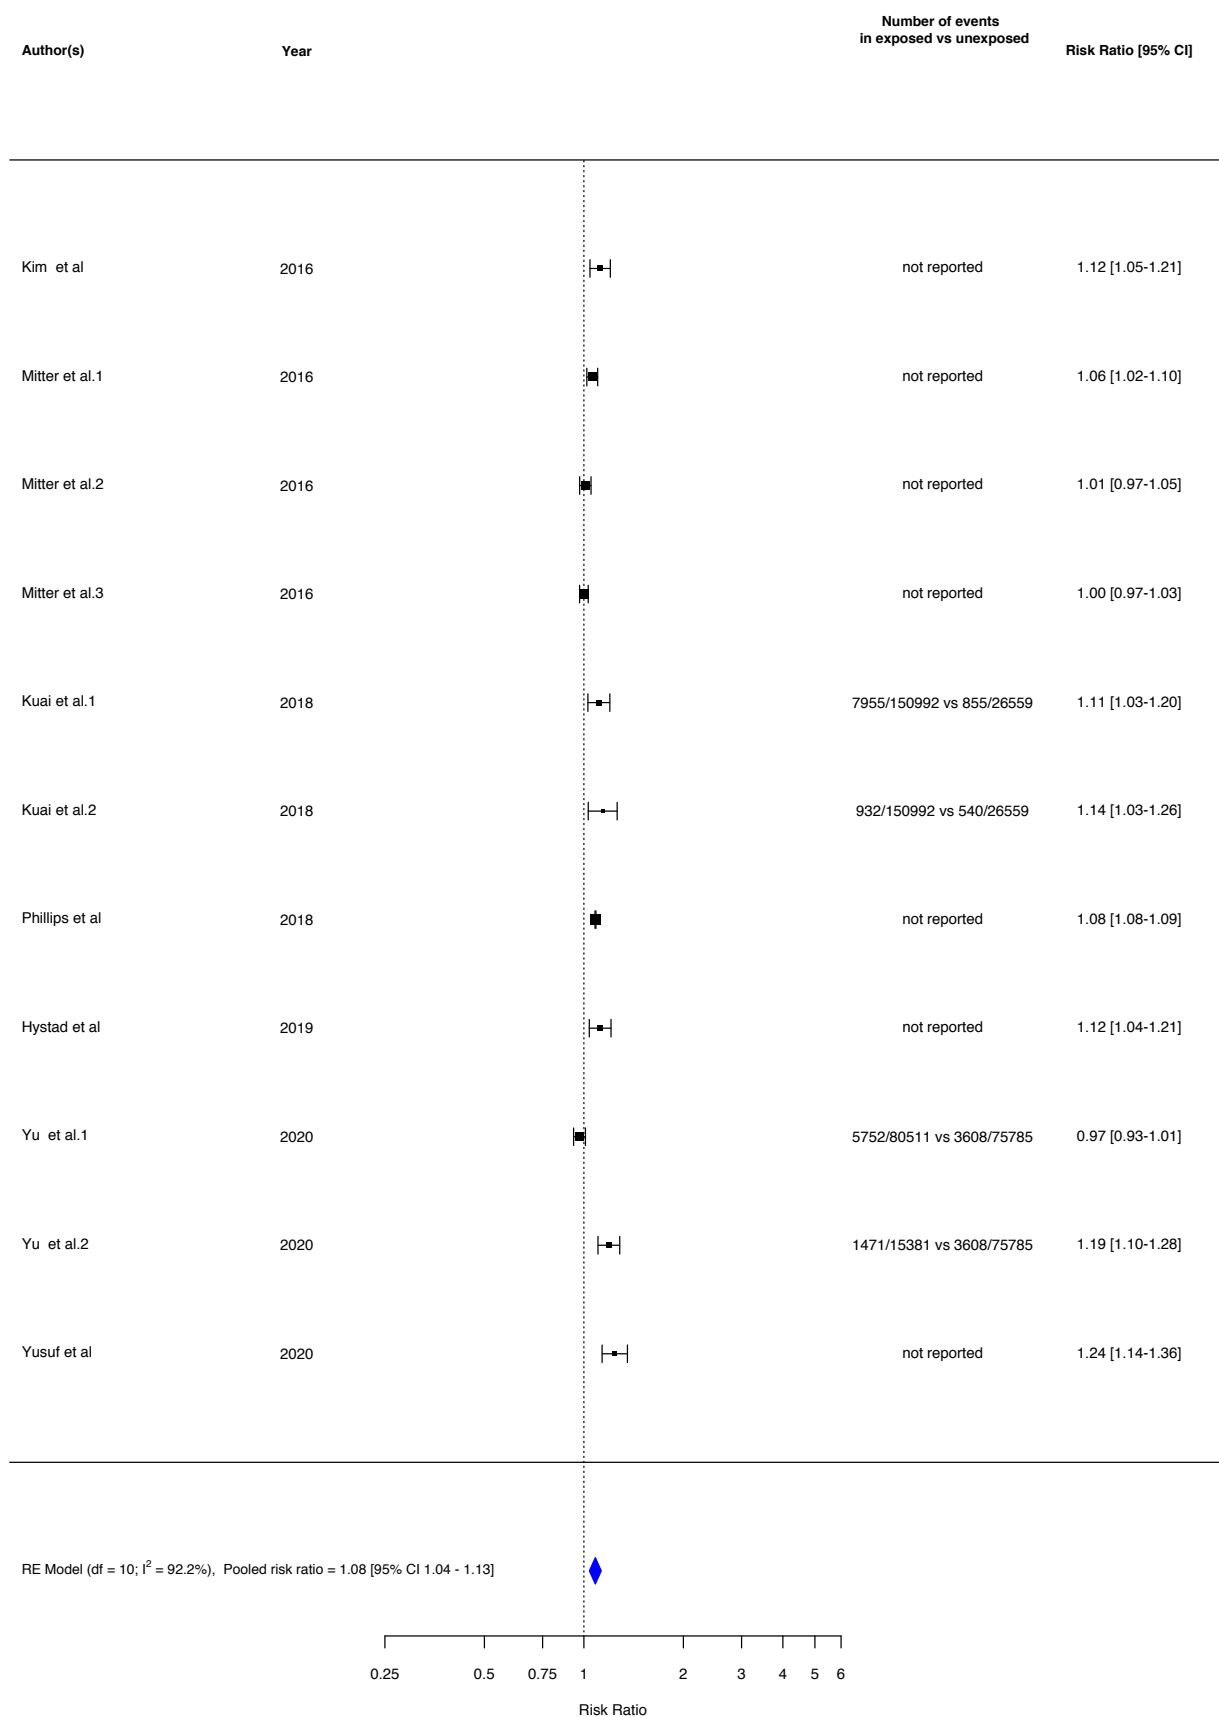

**Figure S22: Pooled risk ratio for respiratory disease associated with use of gas for cooking or heating**

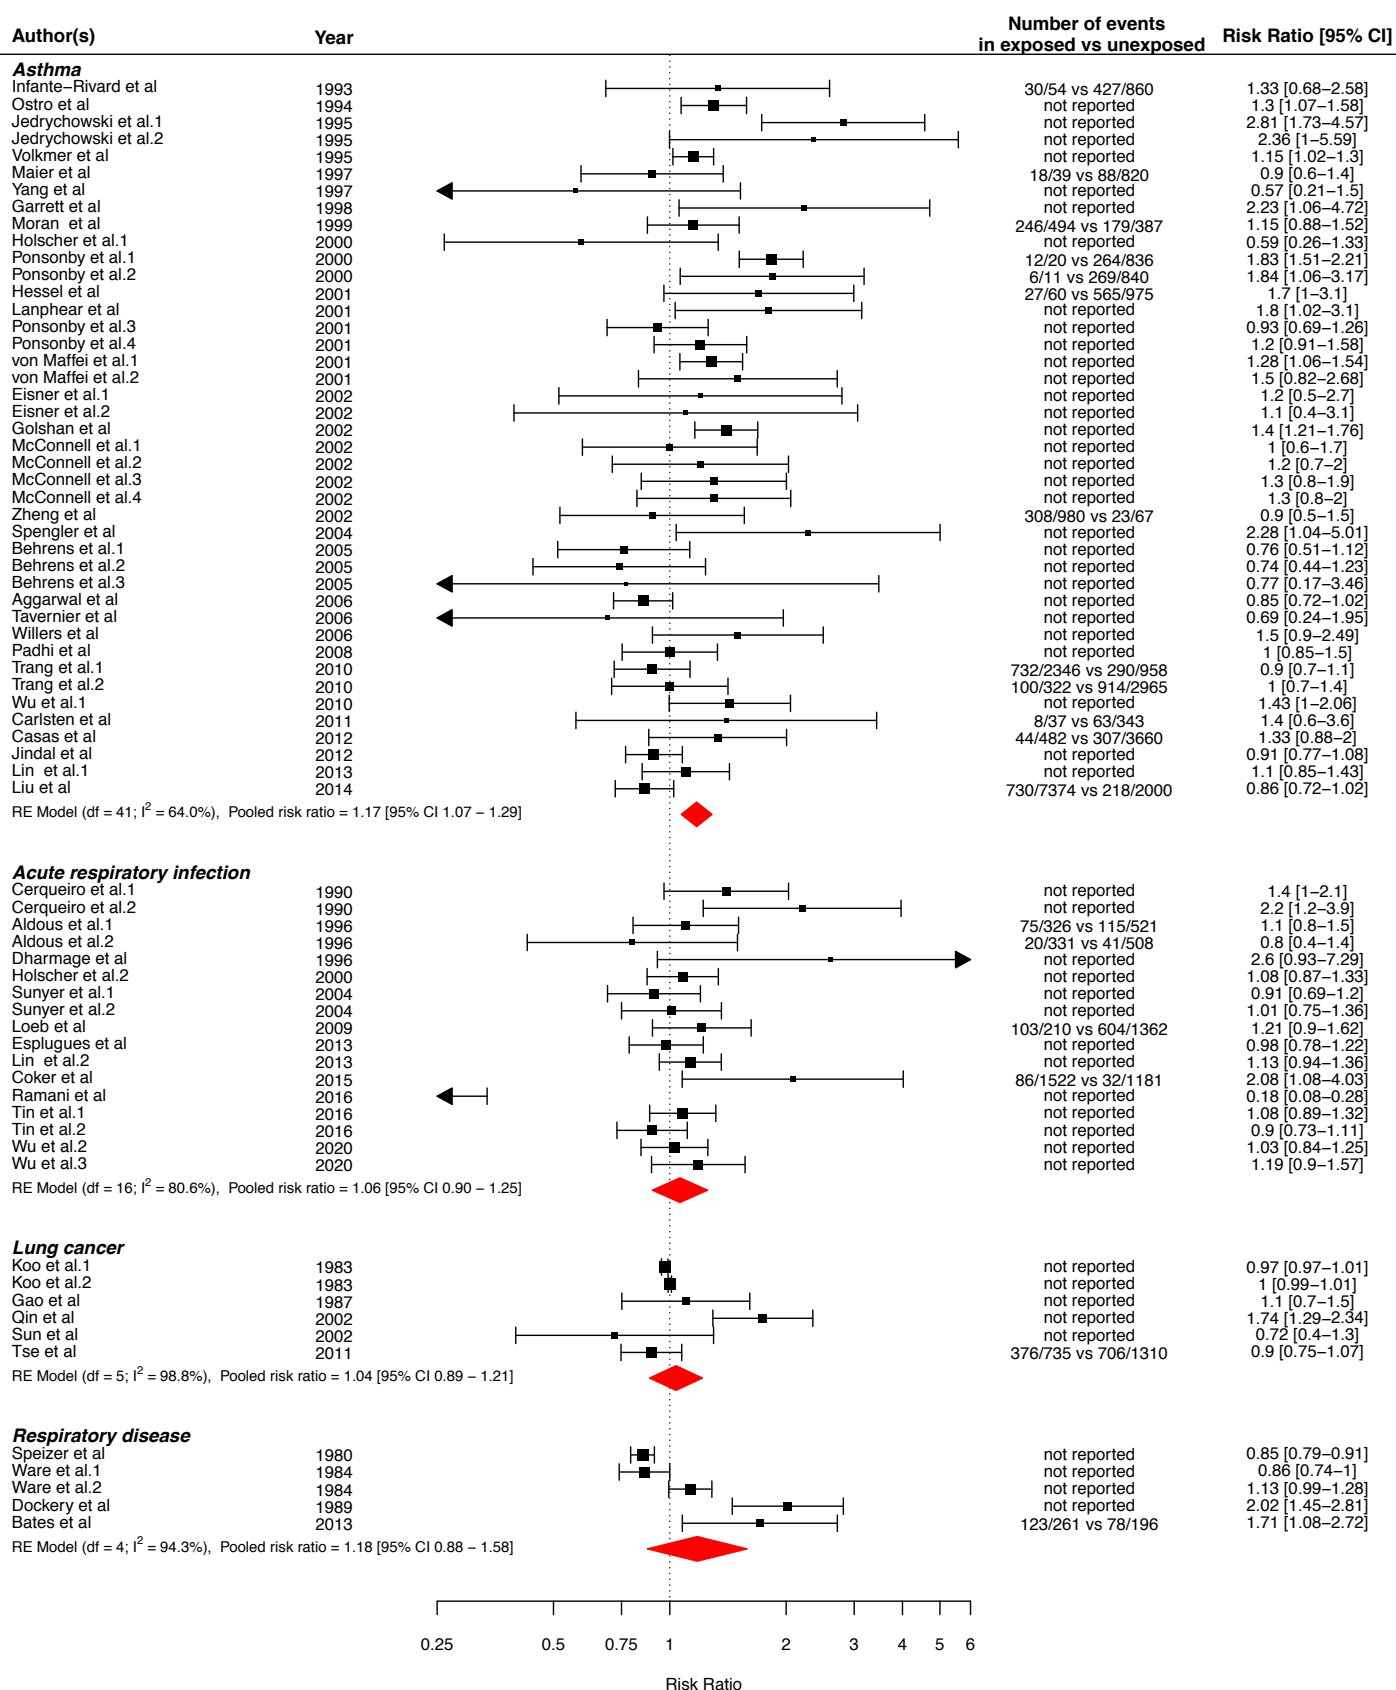

**Figure S23: Pooled risk ratios for respiratory conditions and symptoms in studies comparing use of improved cook stoves and traditional cook stoves**

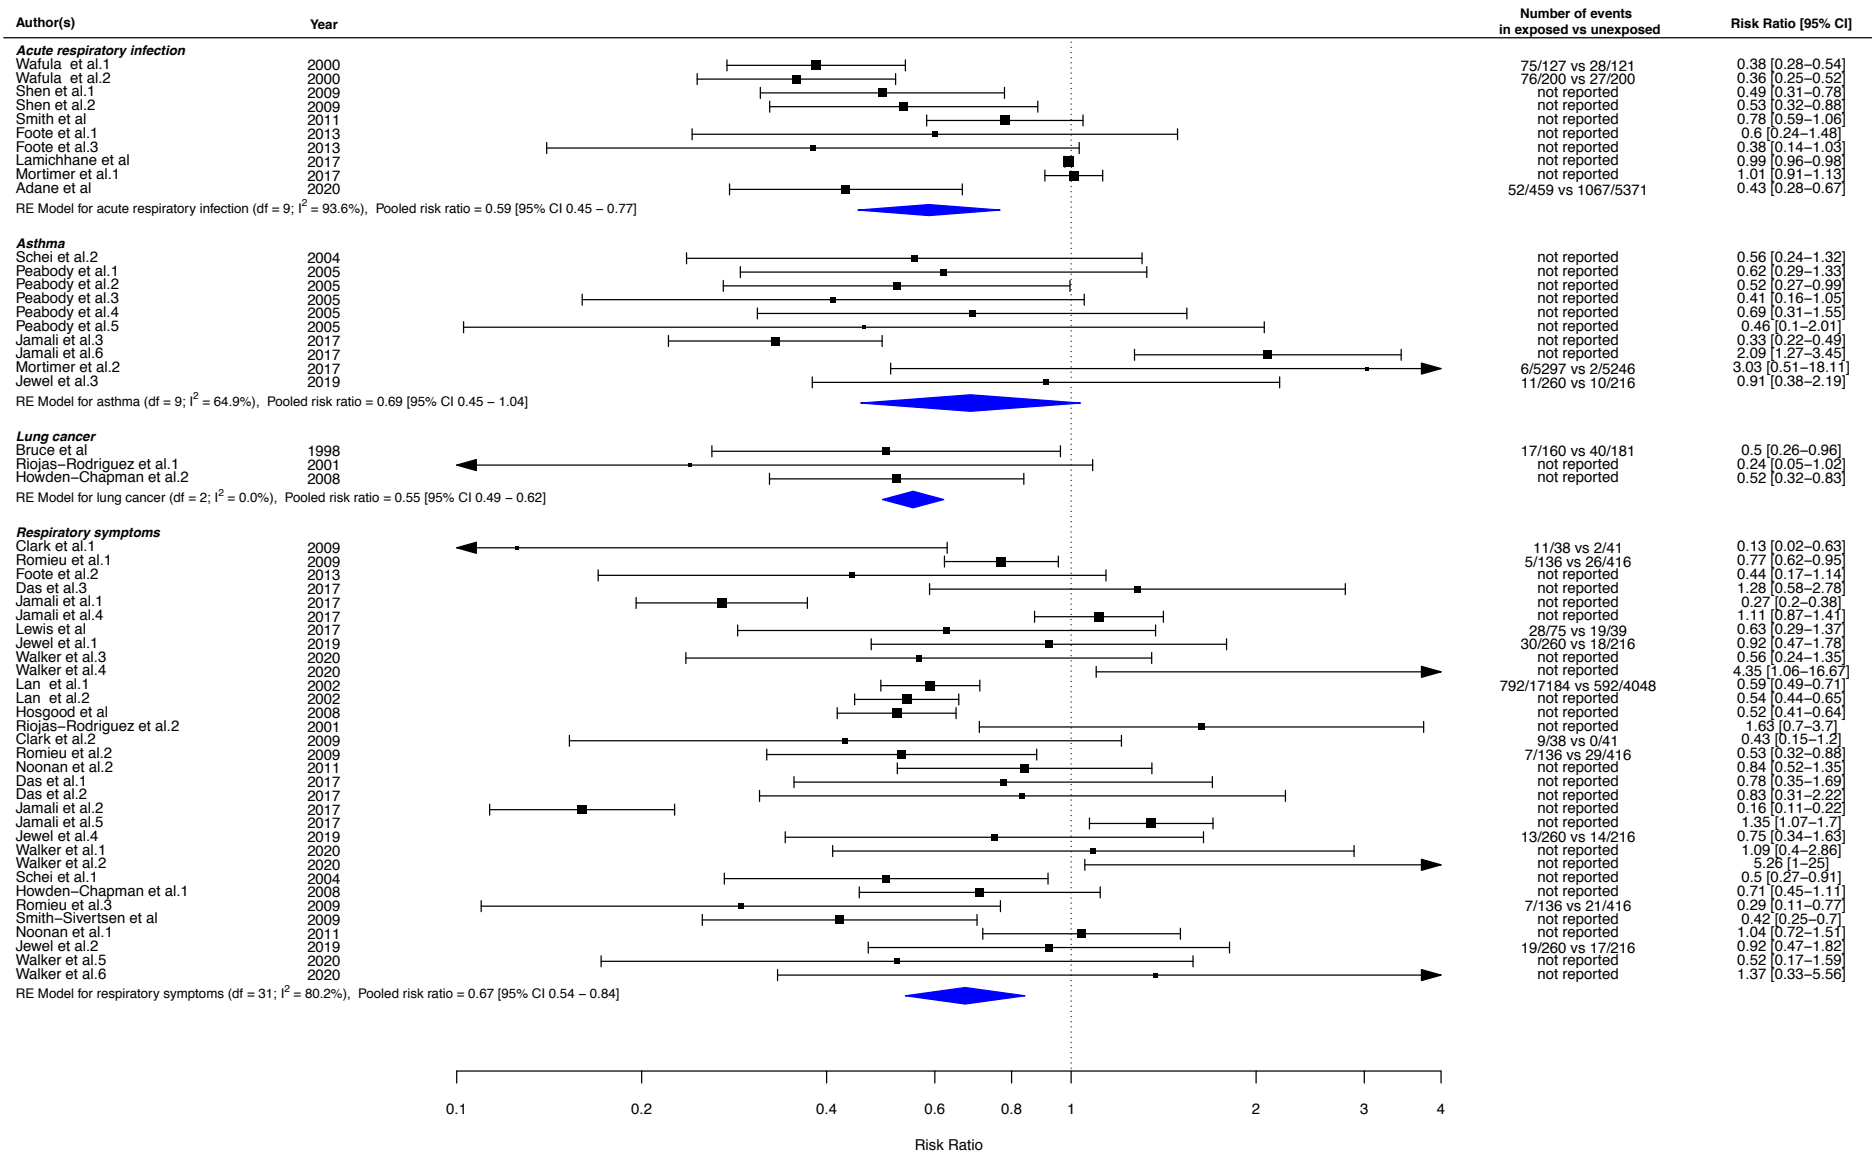

**Figure S24: Pooled risk ratio for symptoms of wheeze associated with use of polluting fuels and technologies**

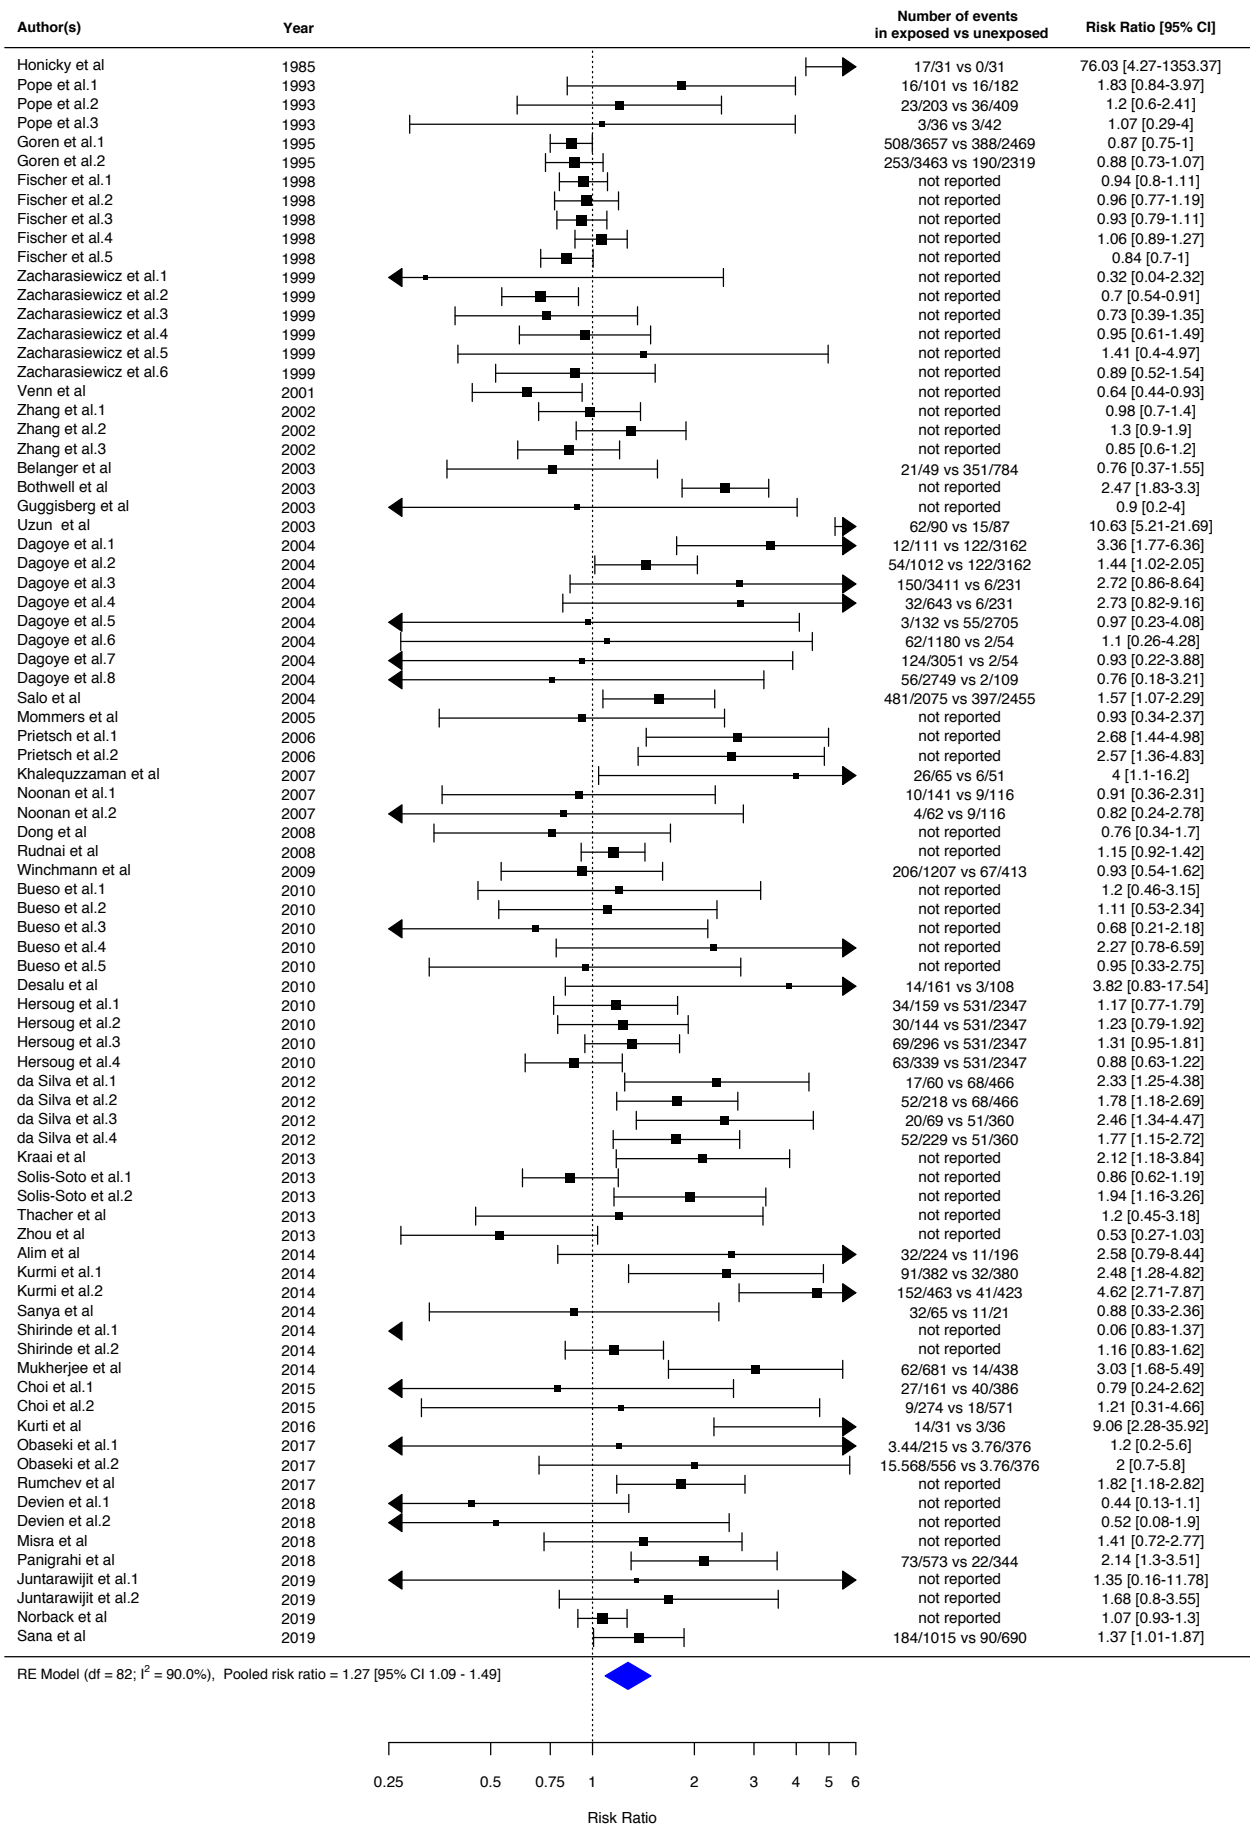

**Figure S25: Pooled risk ratio for symptoms of cough associated with use of polluting fuels and technologies**

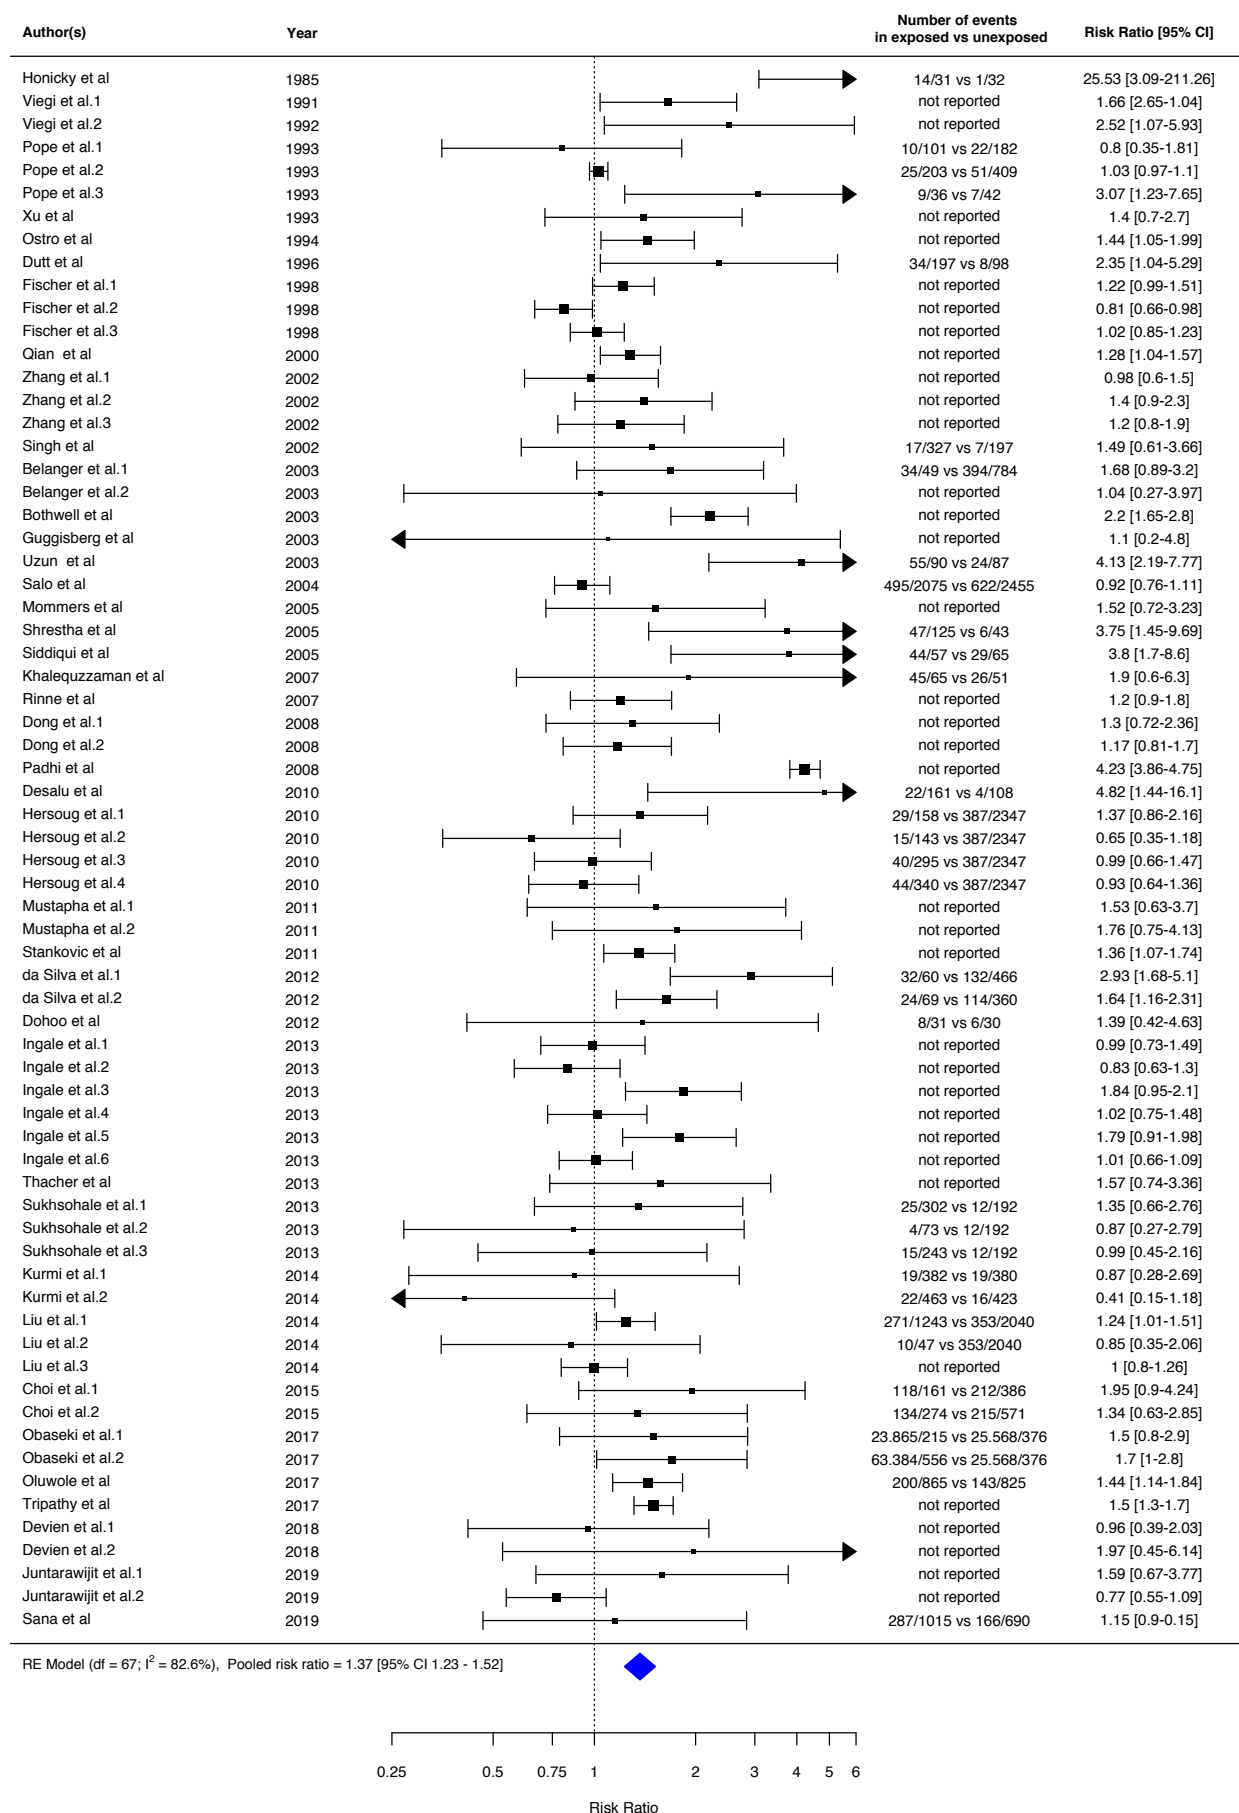

**Figure S26: Pooled risk ratio for symptoms of shortness of breath associated with use of polluting fuels and technologies**

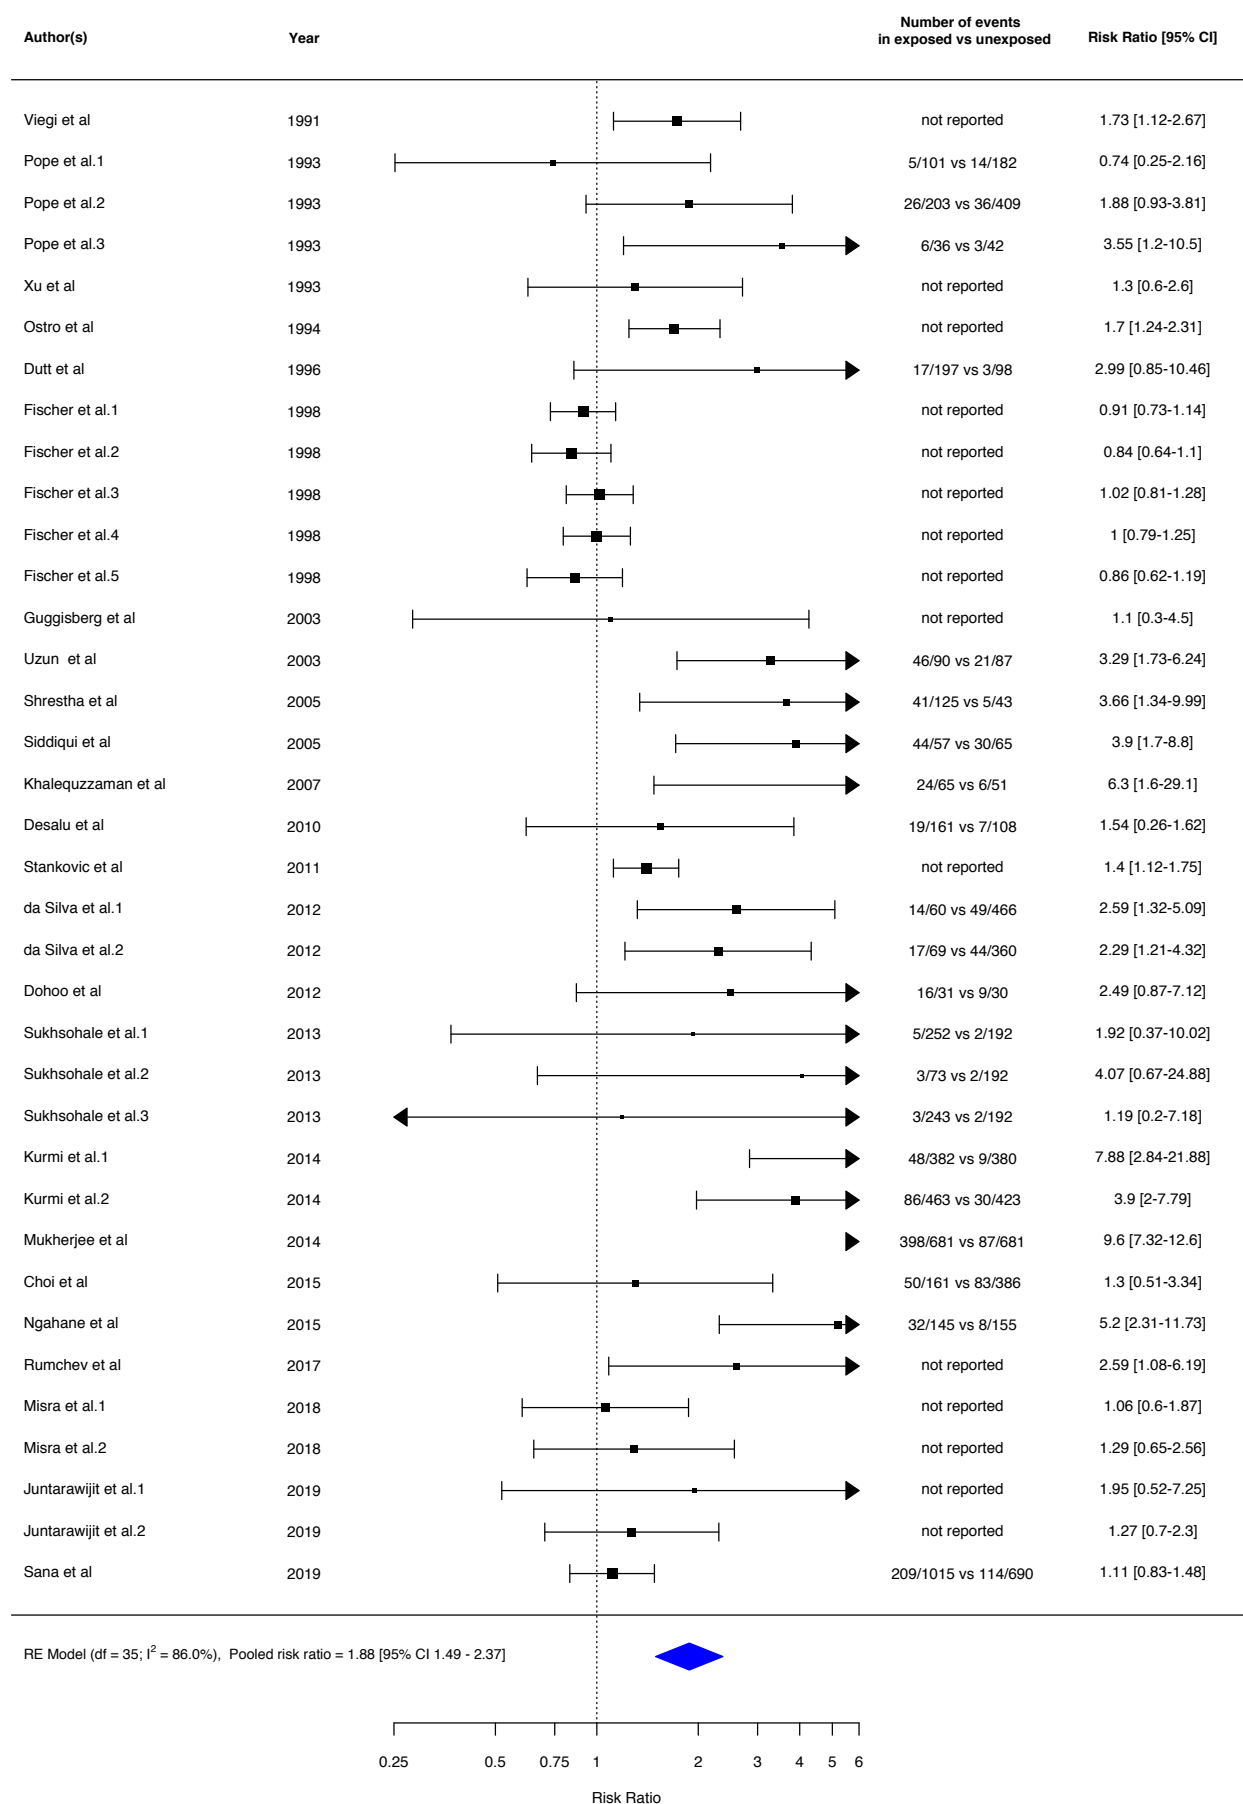



**Figure S27: Pooled mean difference in birth weight associated with use of polluting fuels and technologies.**

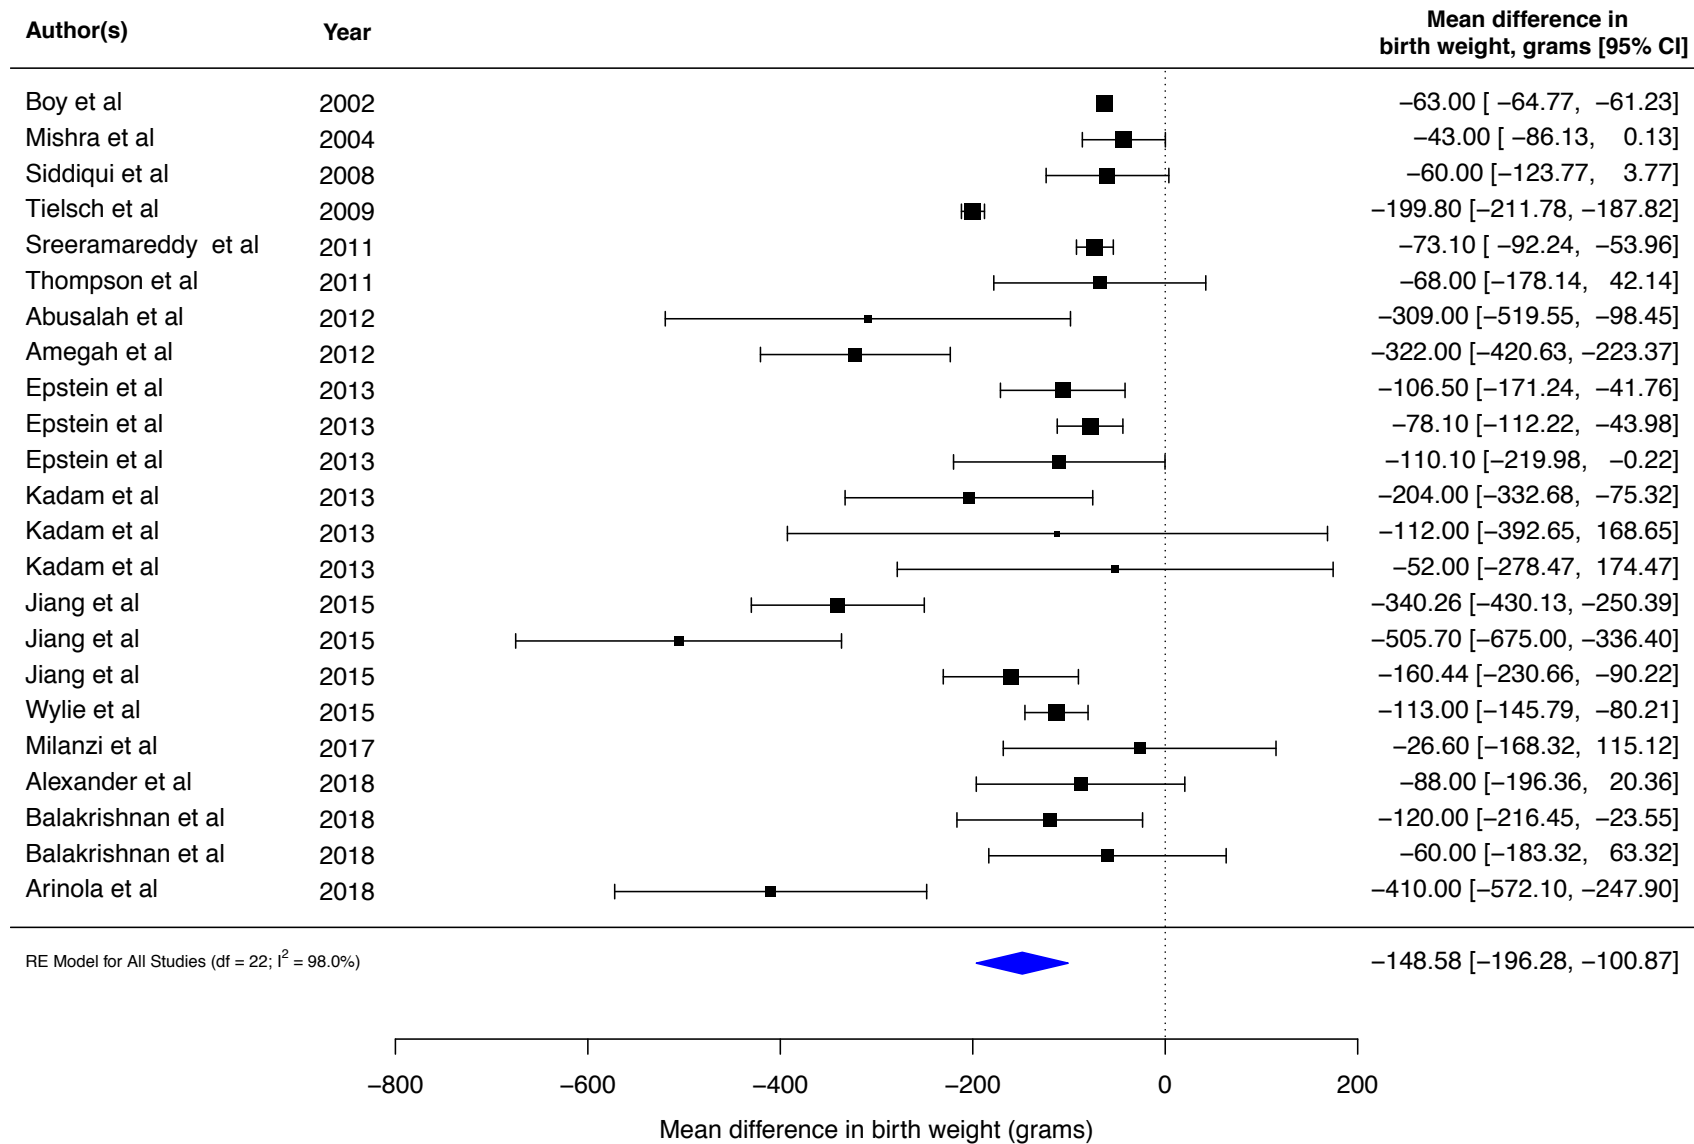

**Figure S28: Pooled risk ratio for asthma and respiratory symptoms per 10 ppb increase in indoor nitrogen dioxide.**

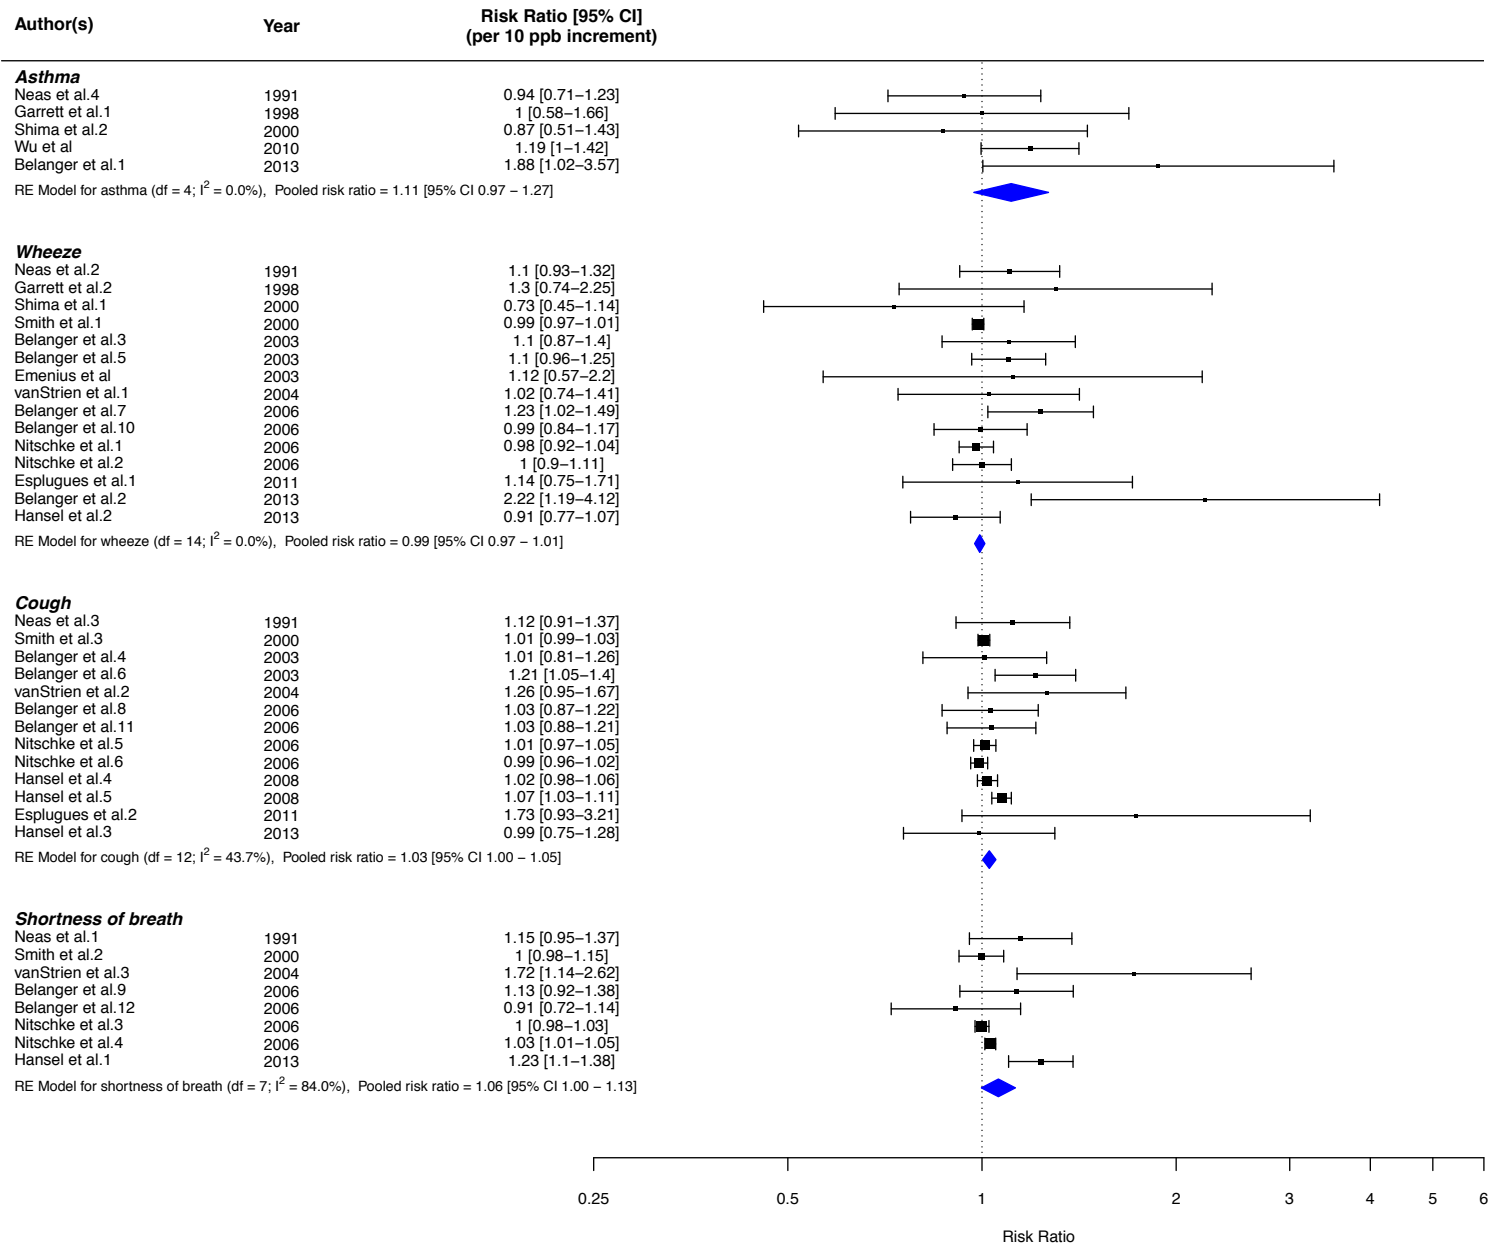

**Figure S29: Pooled risk ratio for asthma and respiratory symptoms per 10 µg/m<sup>3</sup> increase in indoor PM<sub>2.5</sub>**

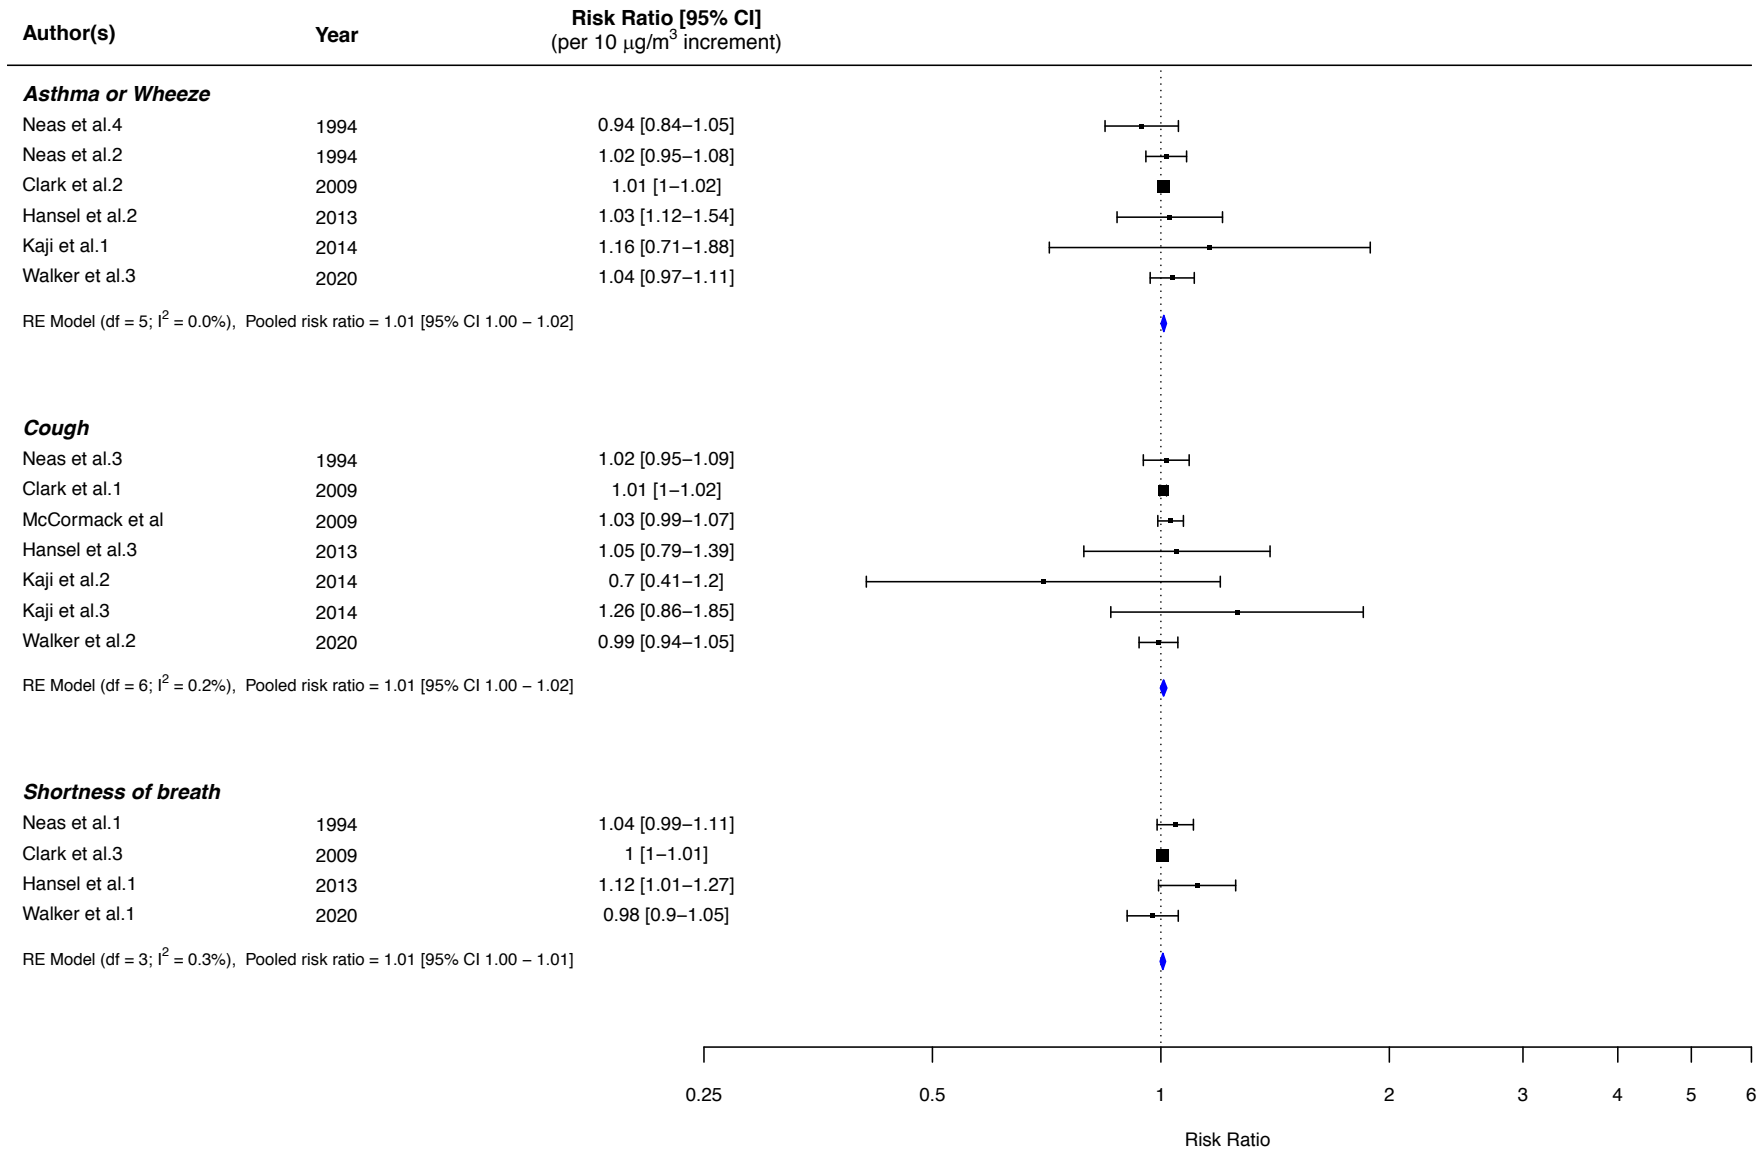

**Figure S30: Pooled risk ratios for cardiorespiratory and adverse pregnancy outcomes associated with use of polluting fuels and technologies across studies assessed to be at low or moderate risk of bias.**

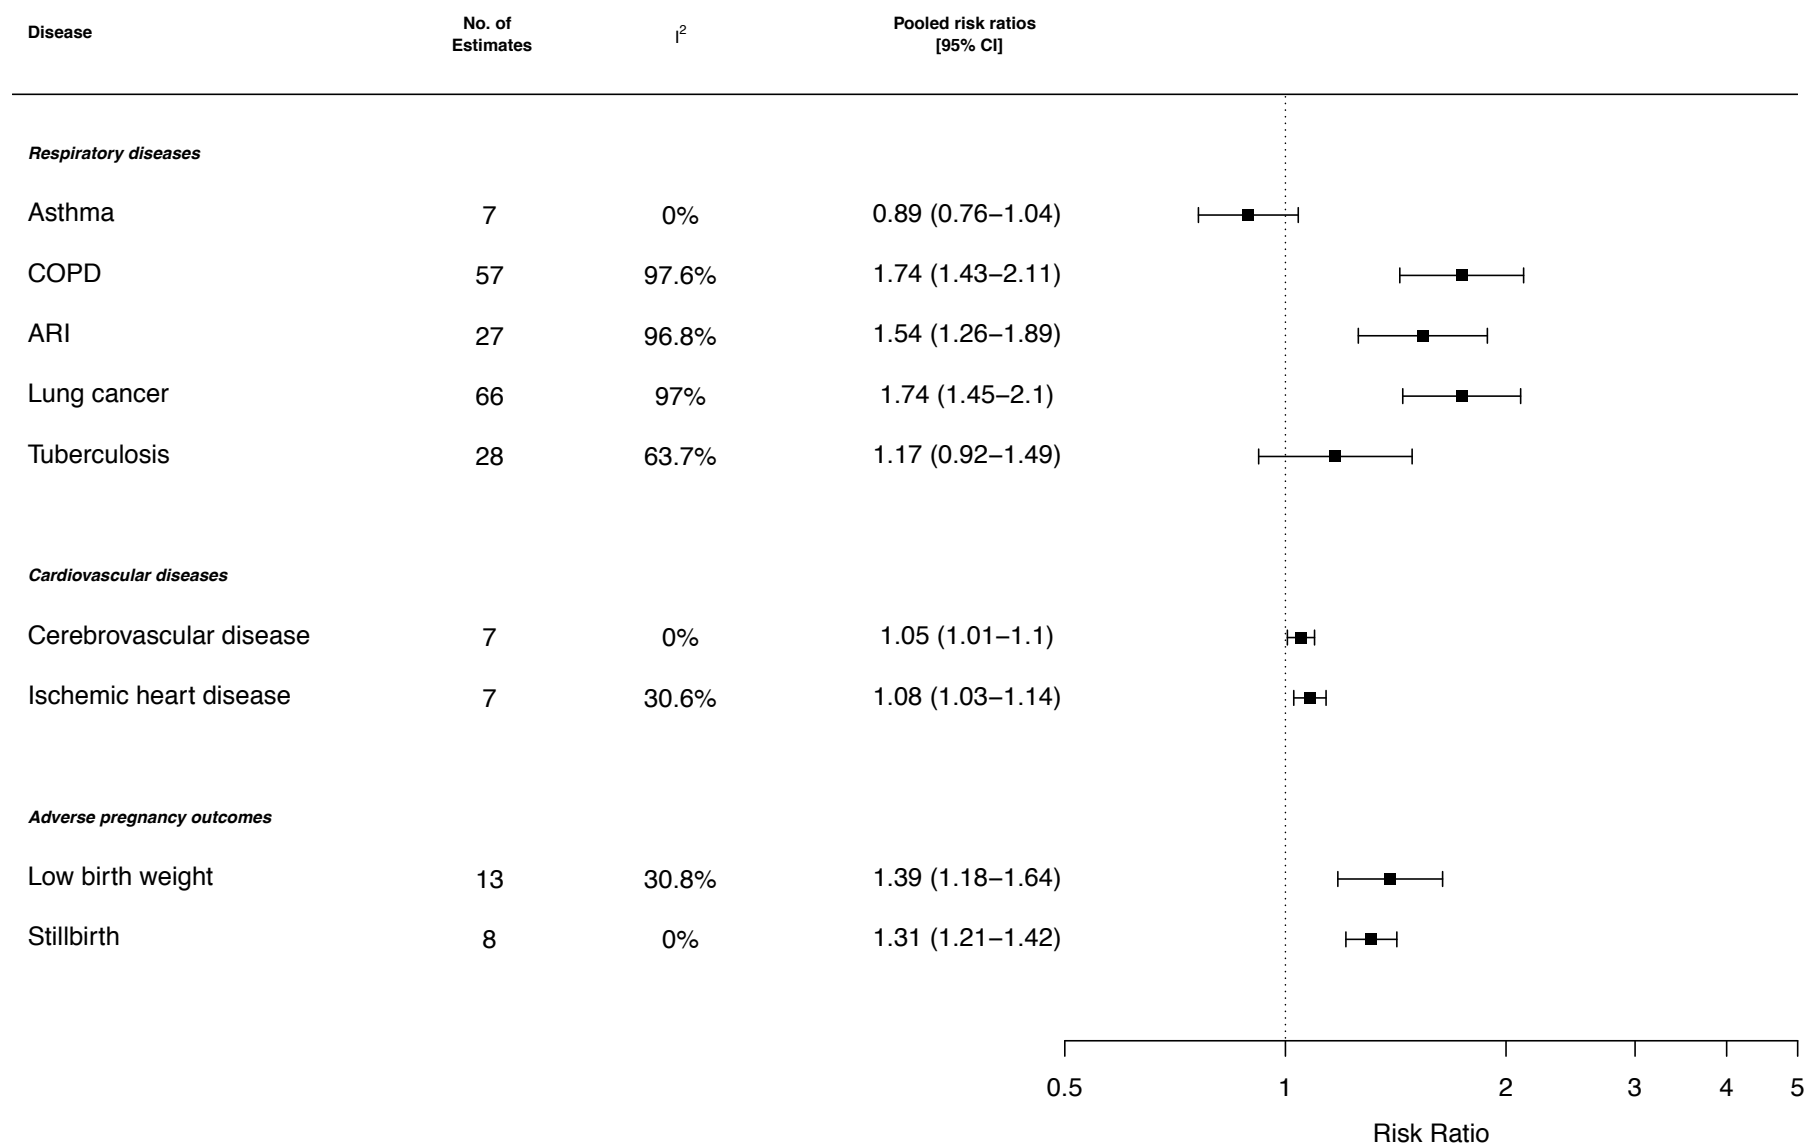

**Figure S31: Pooled risk ratios for mortality associated with use of polluting fuels and technologies across studies assessed to be at low or moderate risk of bias.**

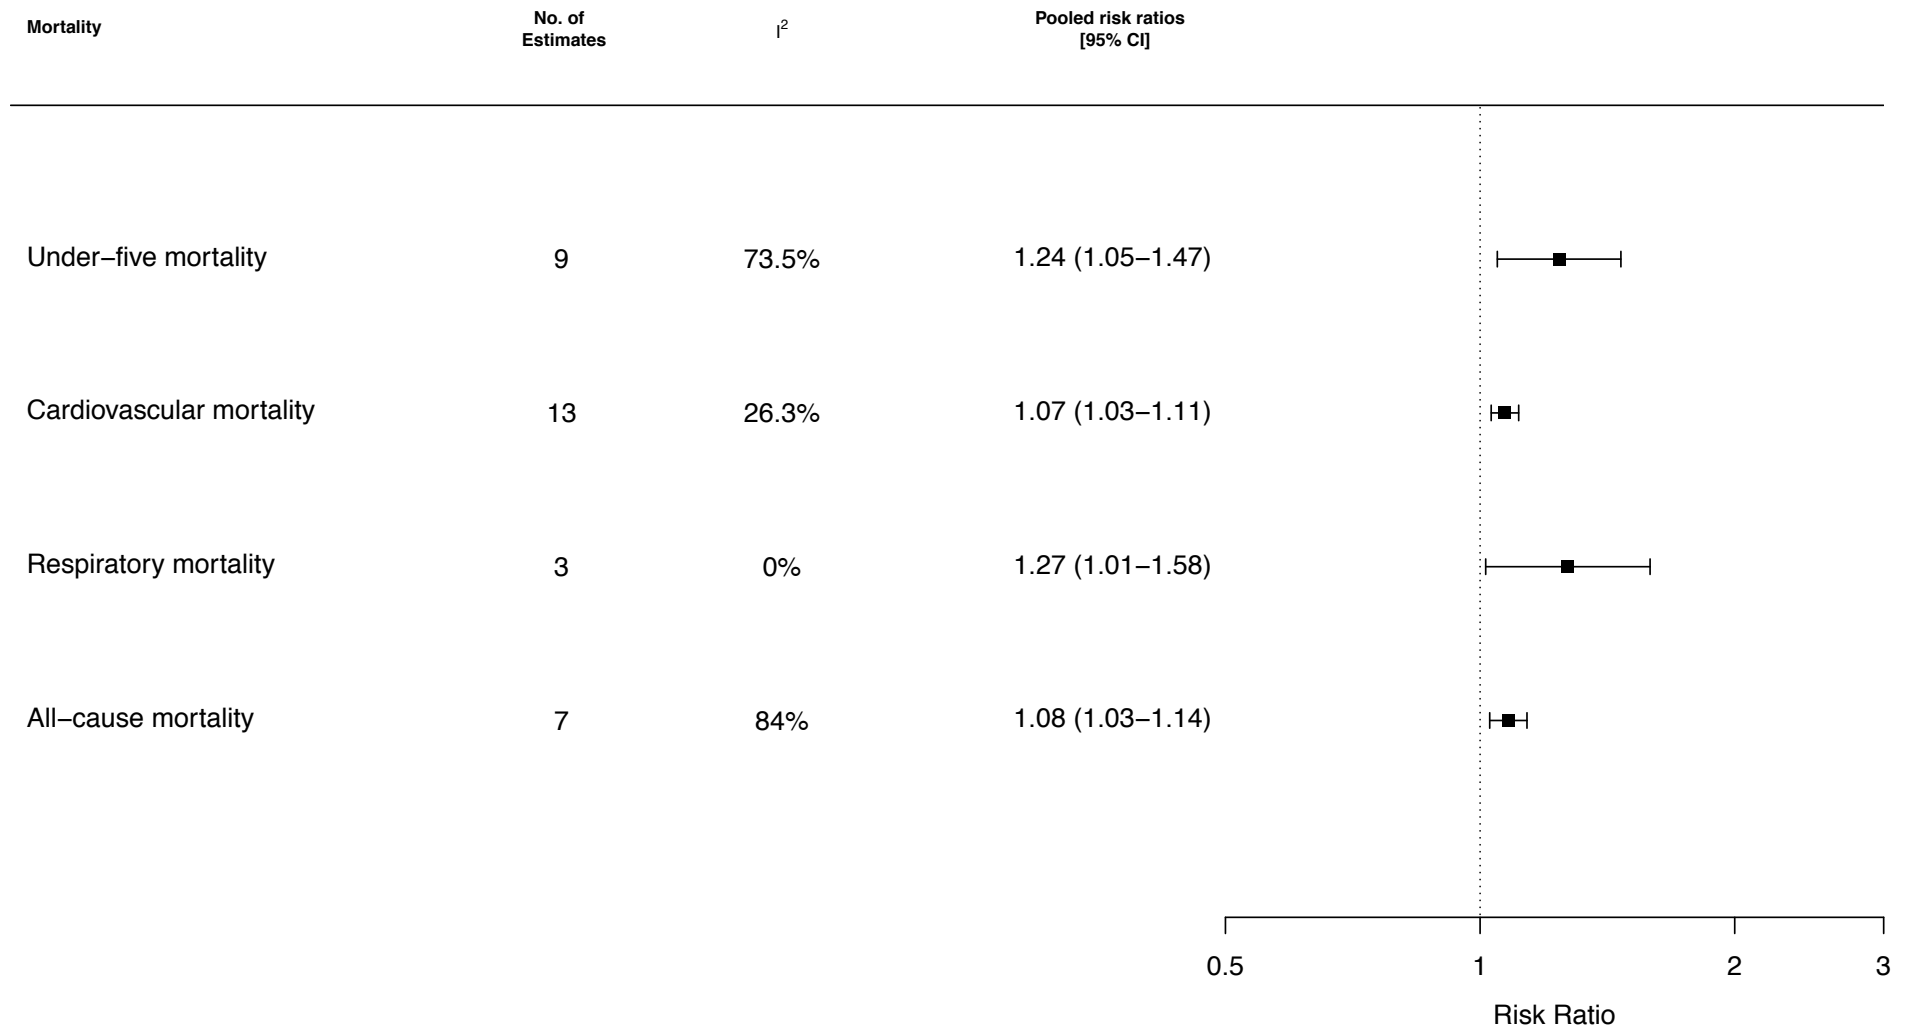

**Figure S32: Sensitivity analysis of risk ratios for cardiorespiratory and adverse pregnancy outcomes associated with use of polluting fuels and technologies across longitudinal studies.**

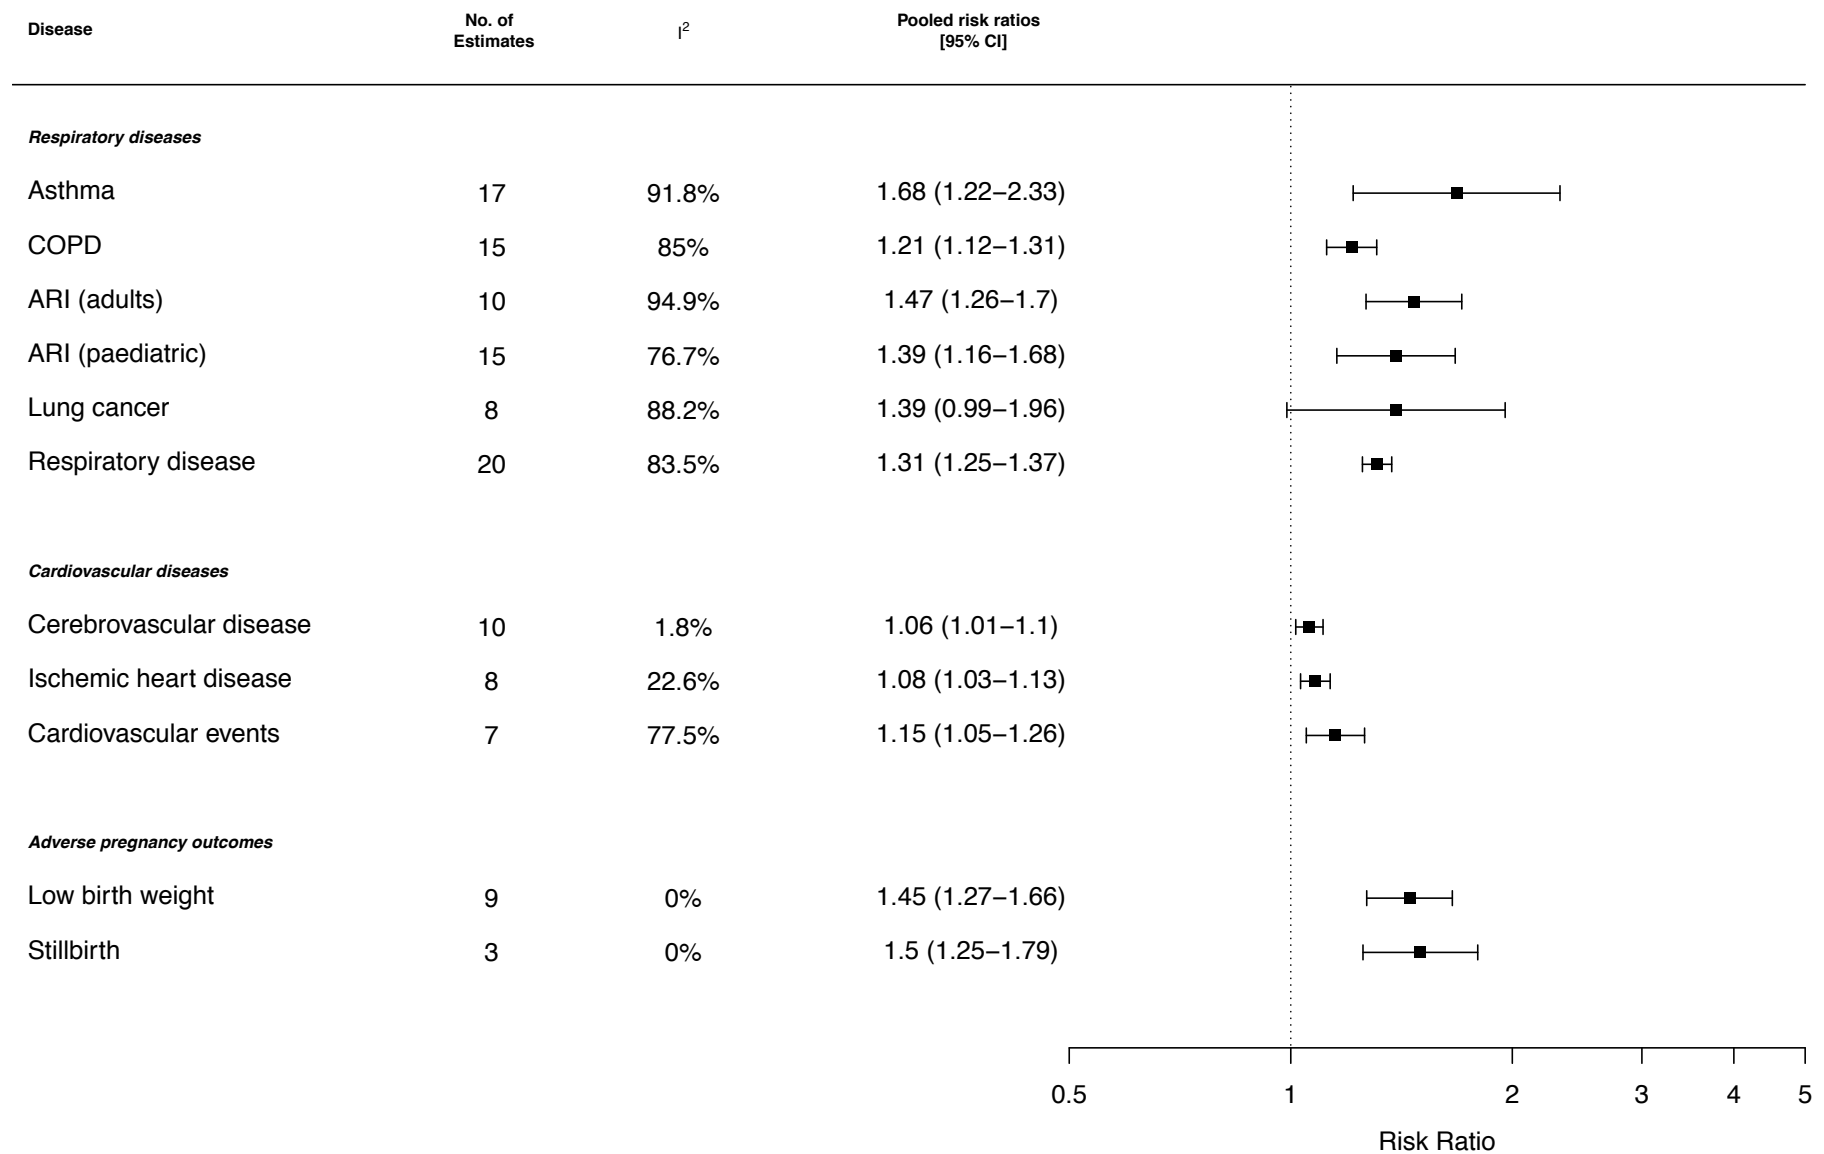

**Figure S33: Pooled risk ratios for cardiorespiratory and paediatric conditions in studies comparing use of polluting fuels or technologies and clean fuels**

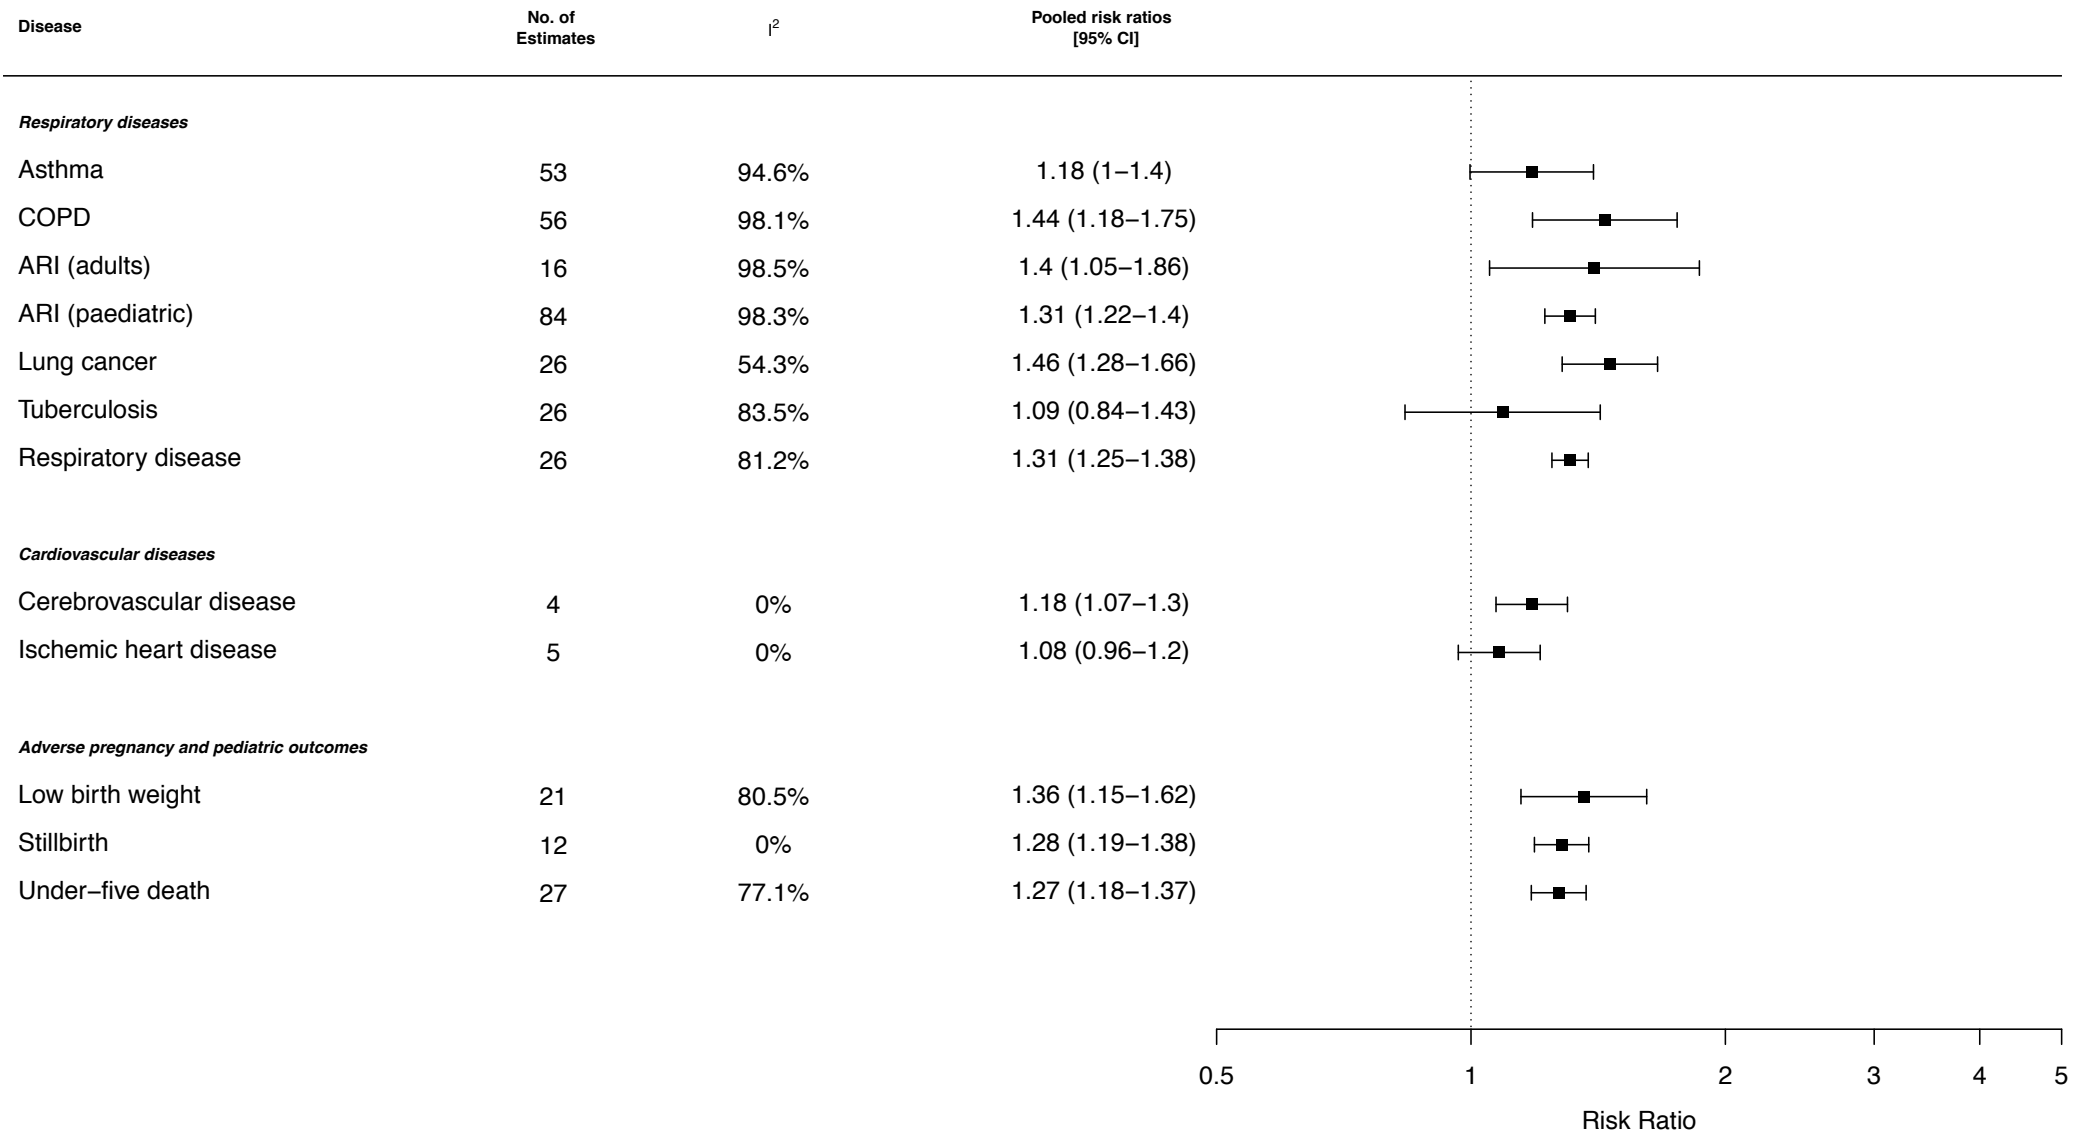

**Figure S34: Trends in burden of disease (disability adjusted life years) attributable to household air pollution stratified by 2018 World Bank income groups from 2000-2017.**

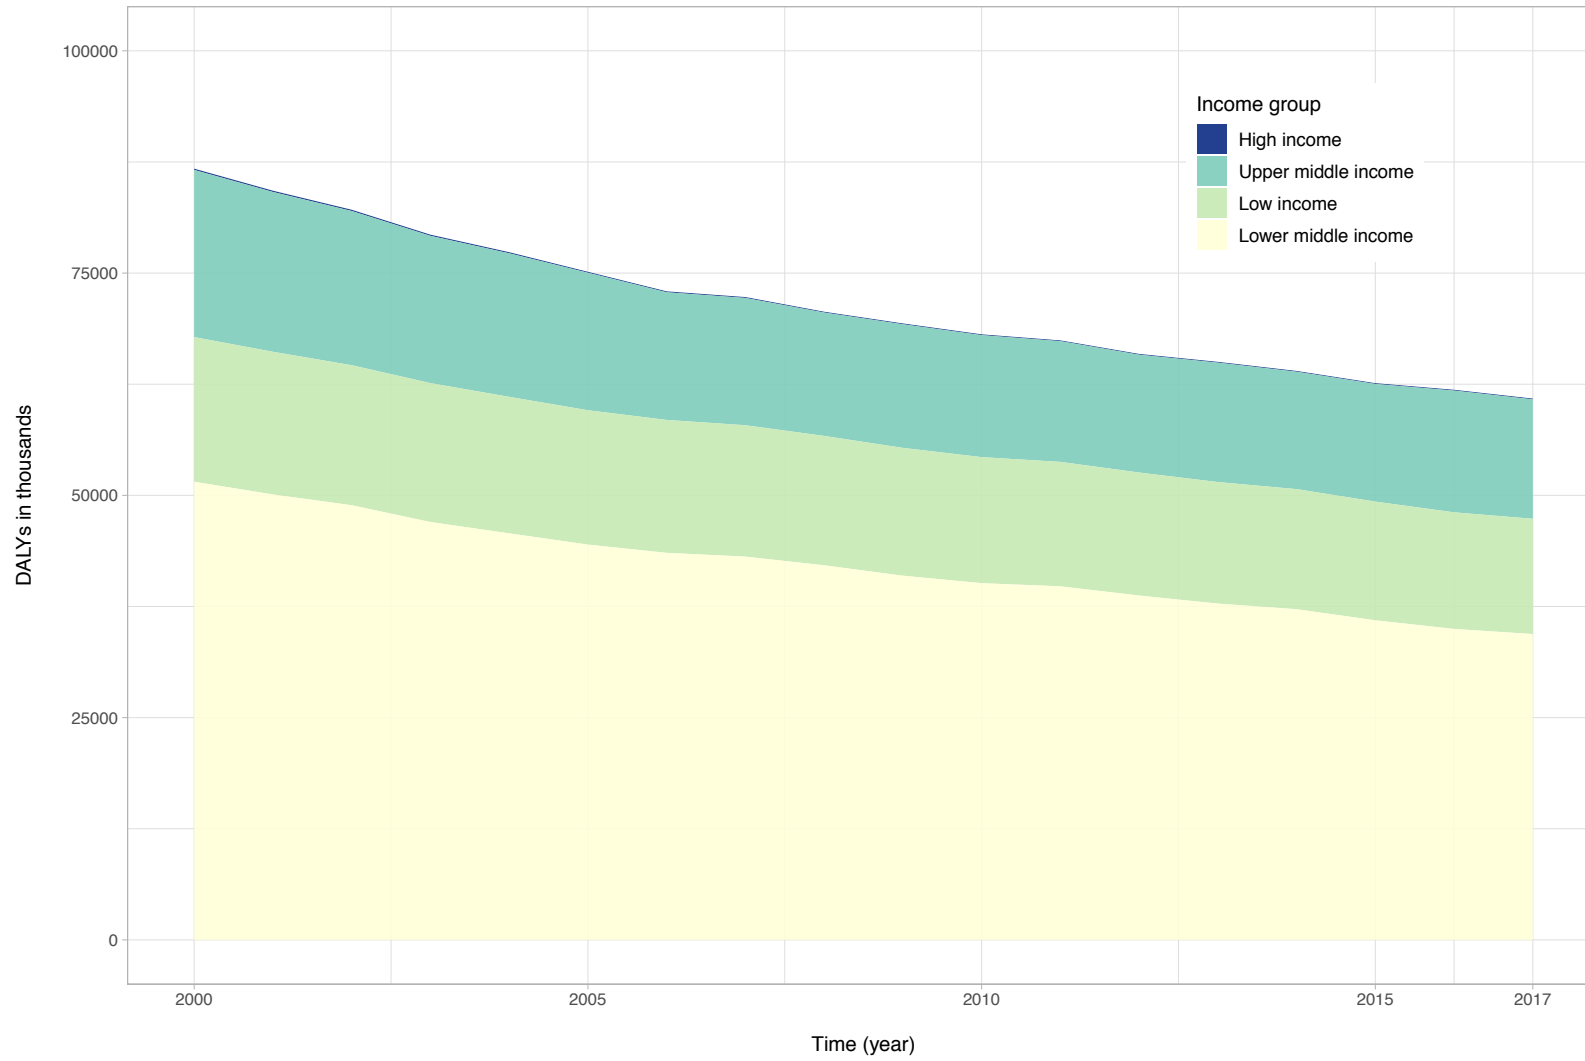



Figure S35: Cartogram of global burden of disease attributable to household air pollution in 2017.

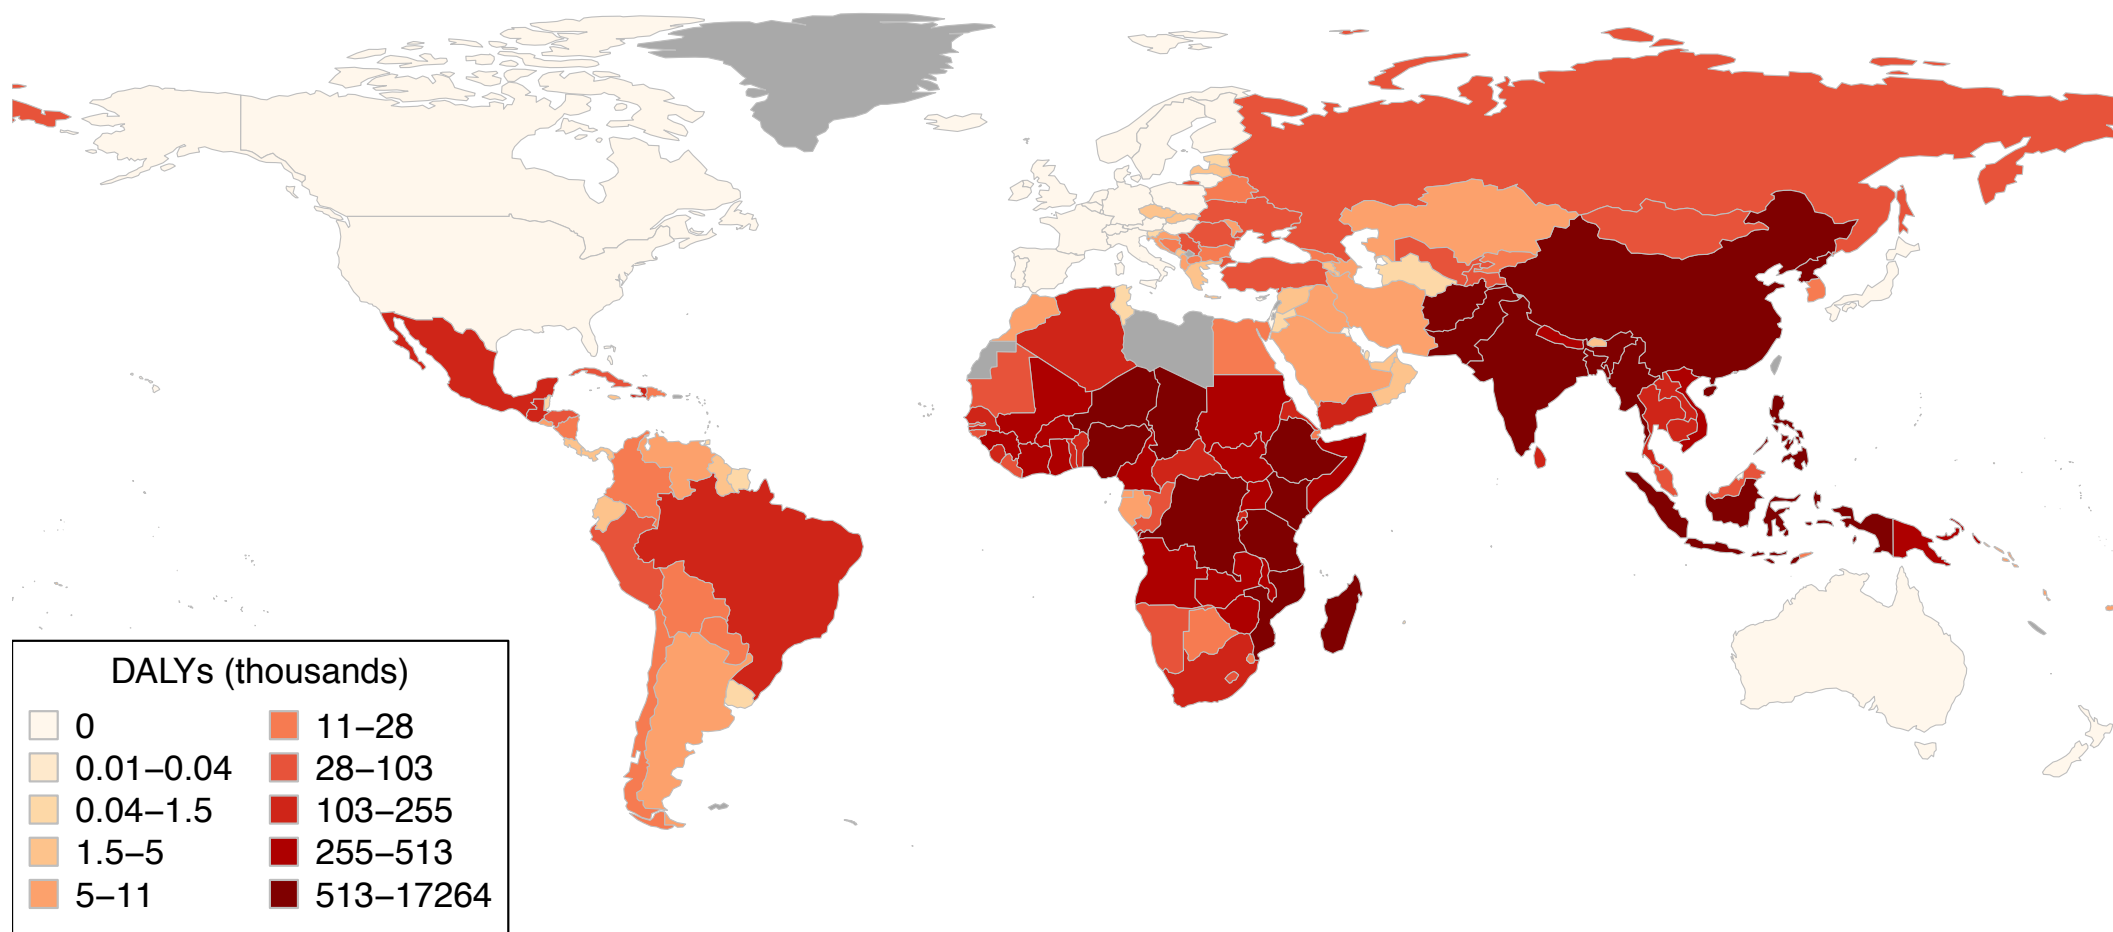

**Figure S36: Trends in deaths attributable to household air pollution stratified by income**

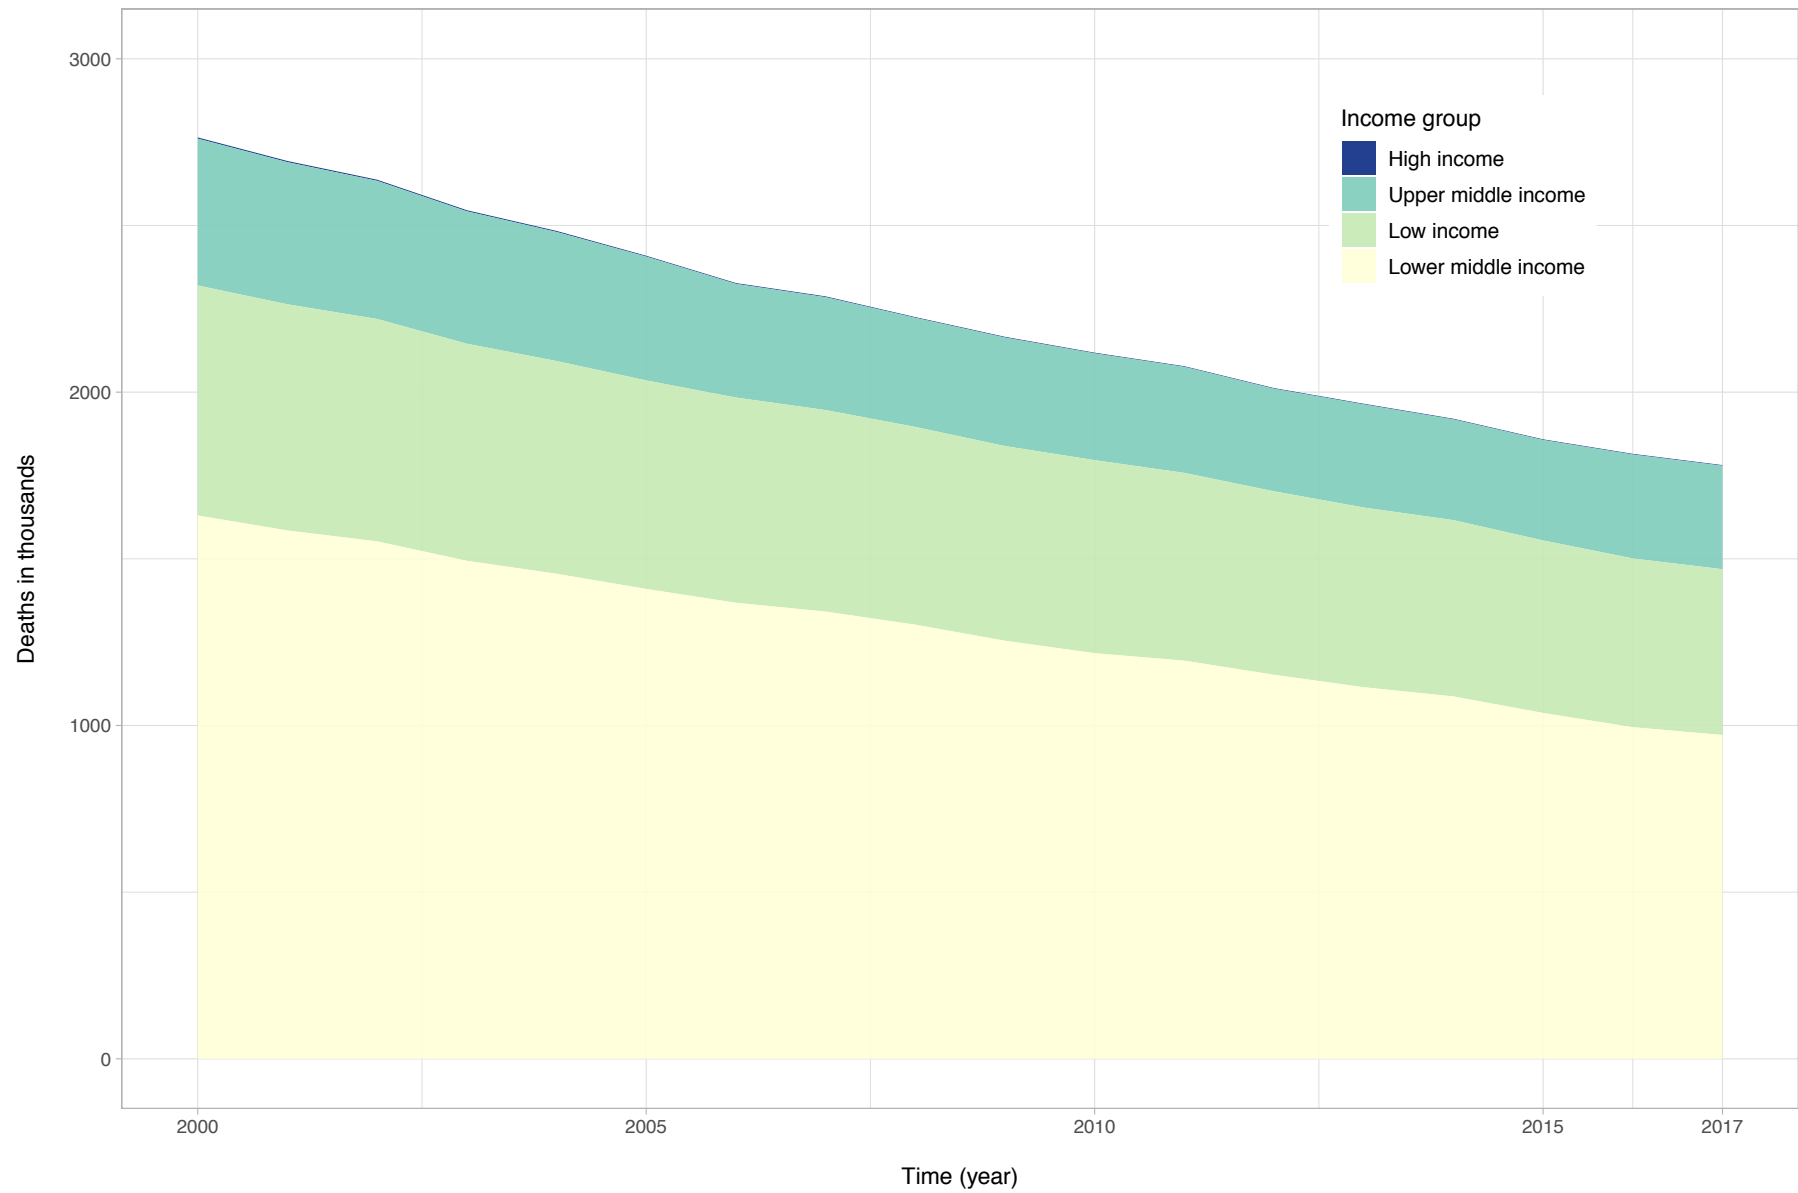

**Figure S37: Trends in deaths attributable to household air pollution stratified by WHO regions**

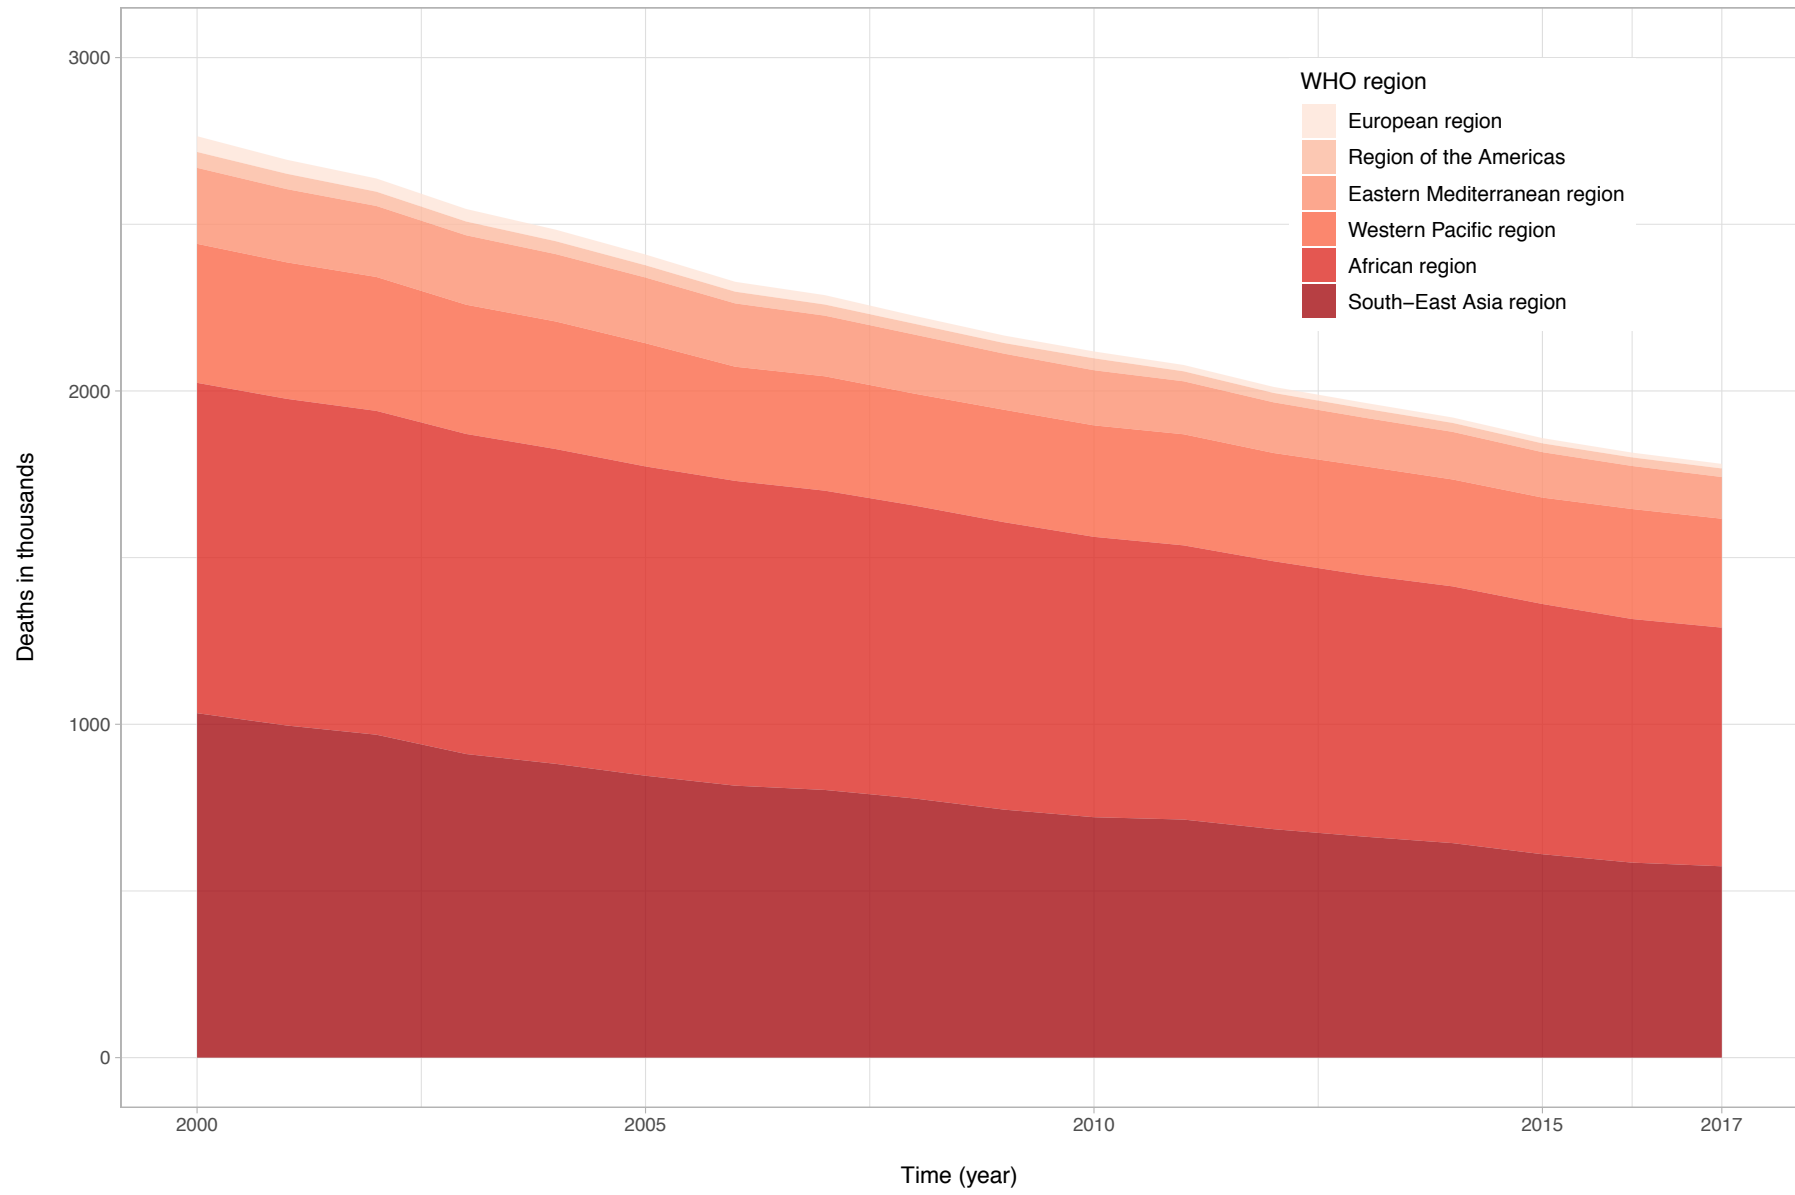

**Figure S38: Trends in cardiovascular, respiratory and under five mortality attributable to household air pollution**

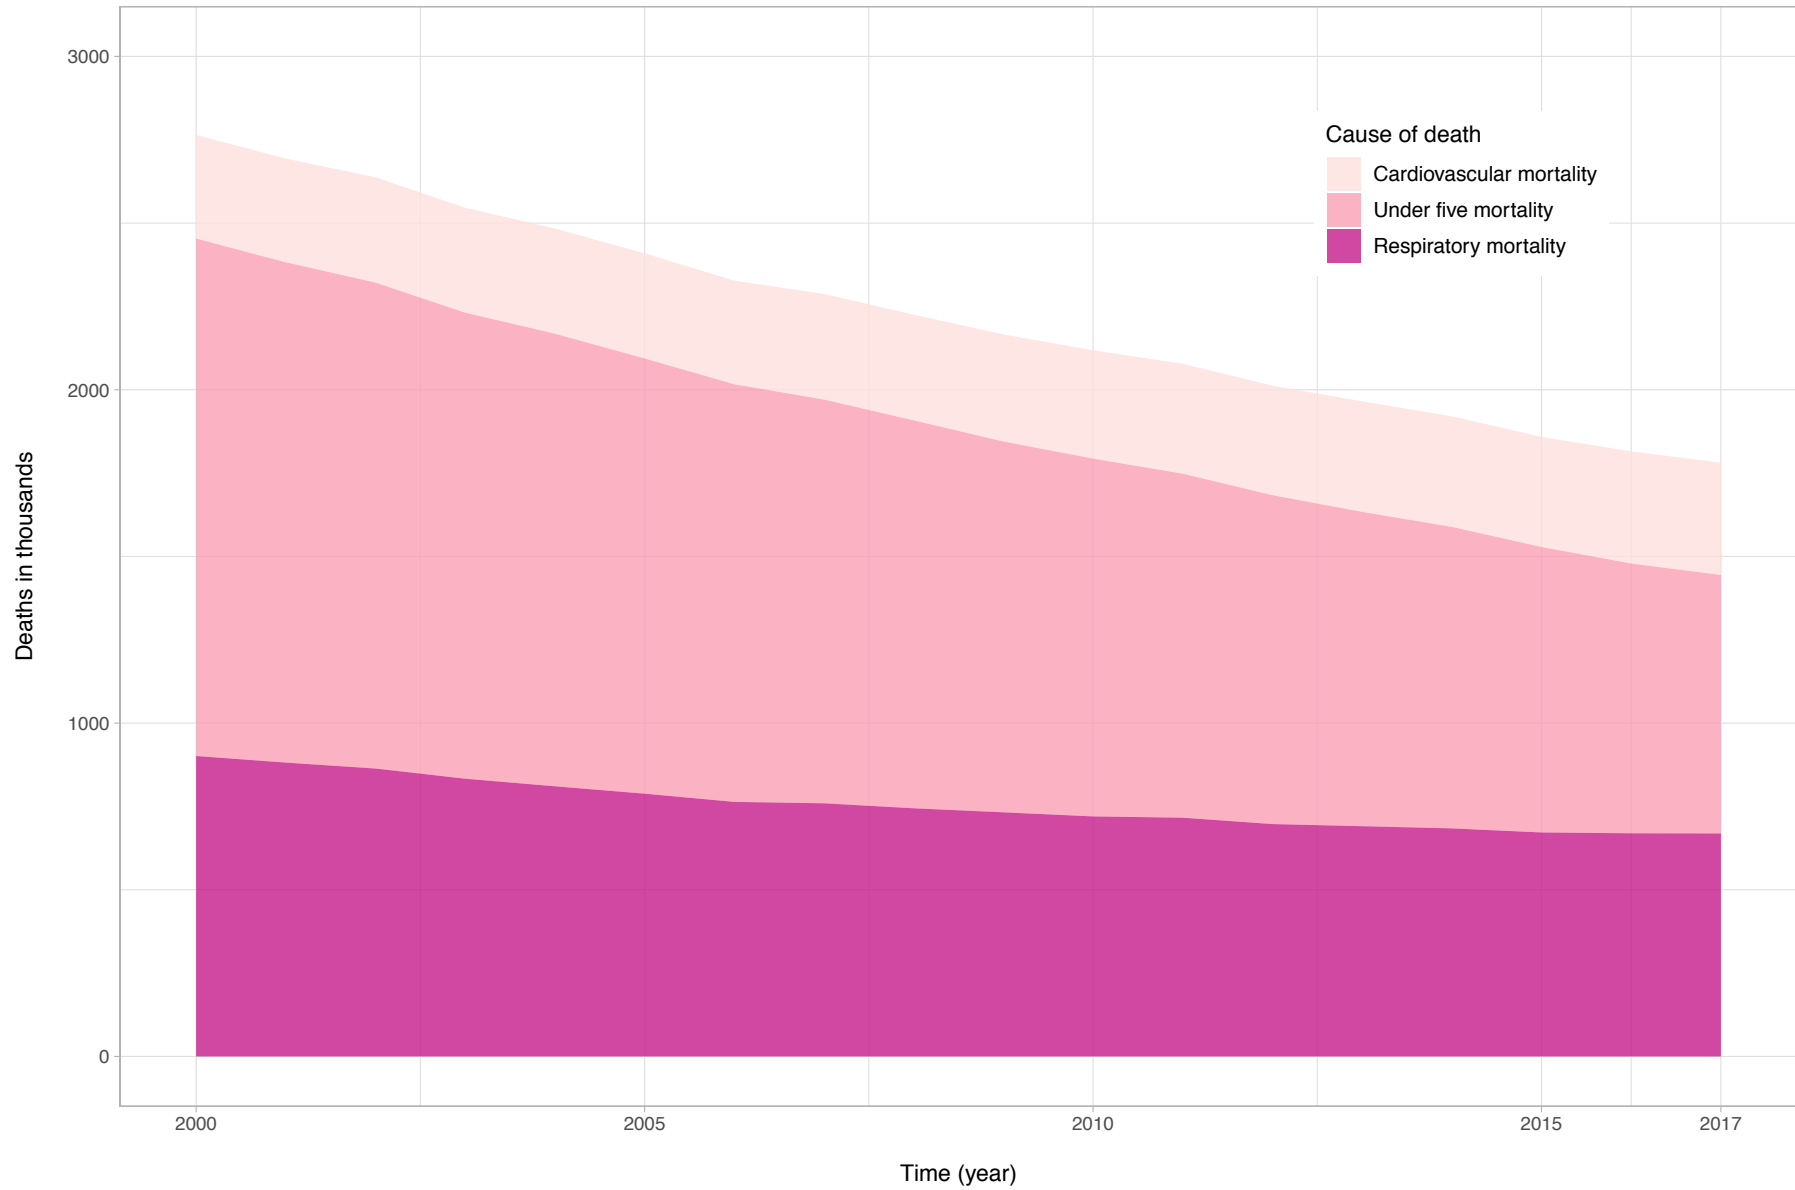

**Figure S39: Trends in burden attributable to household air pollution using pooled risk ratios from studies where the comparator was clean fuel use stratified by WHO regions**

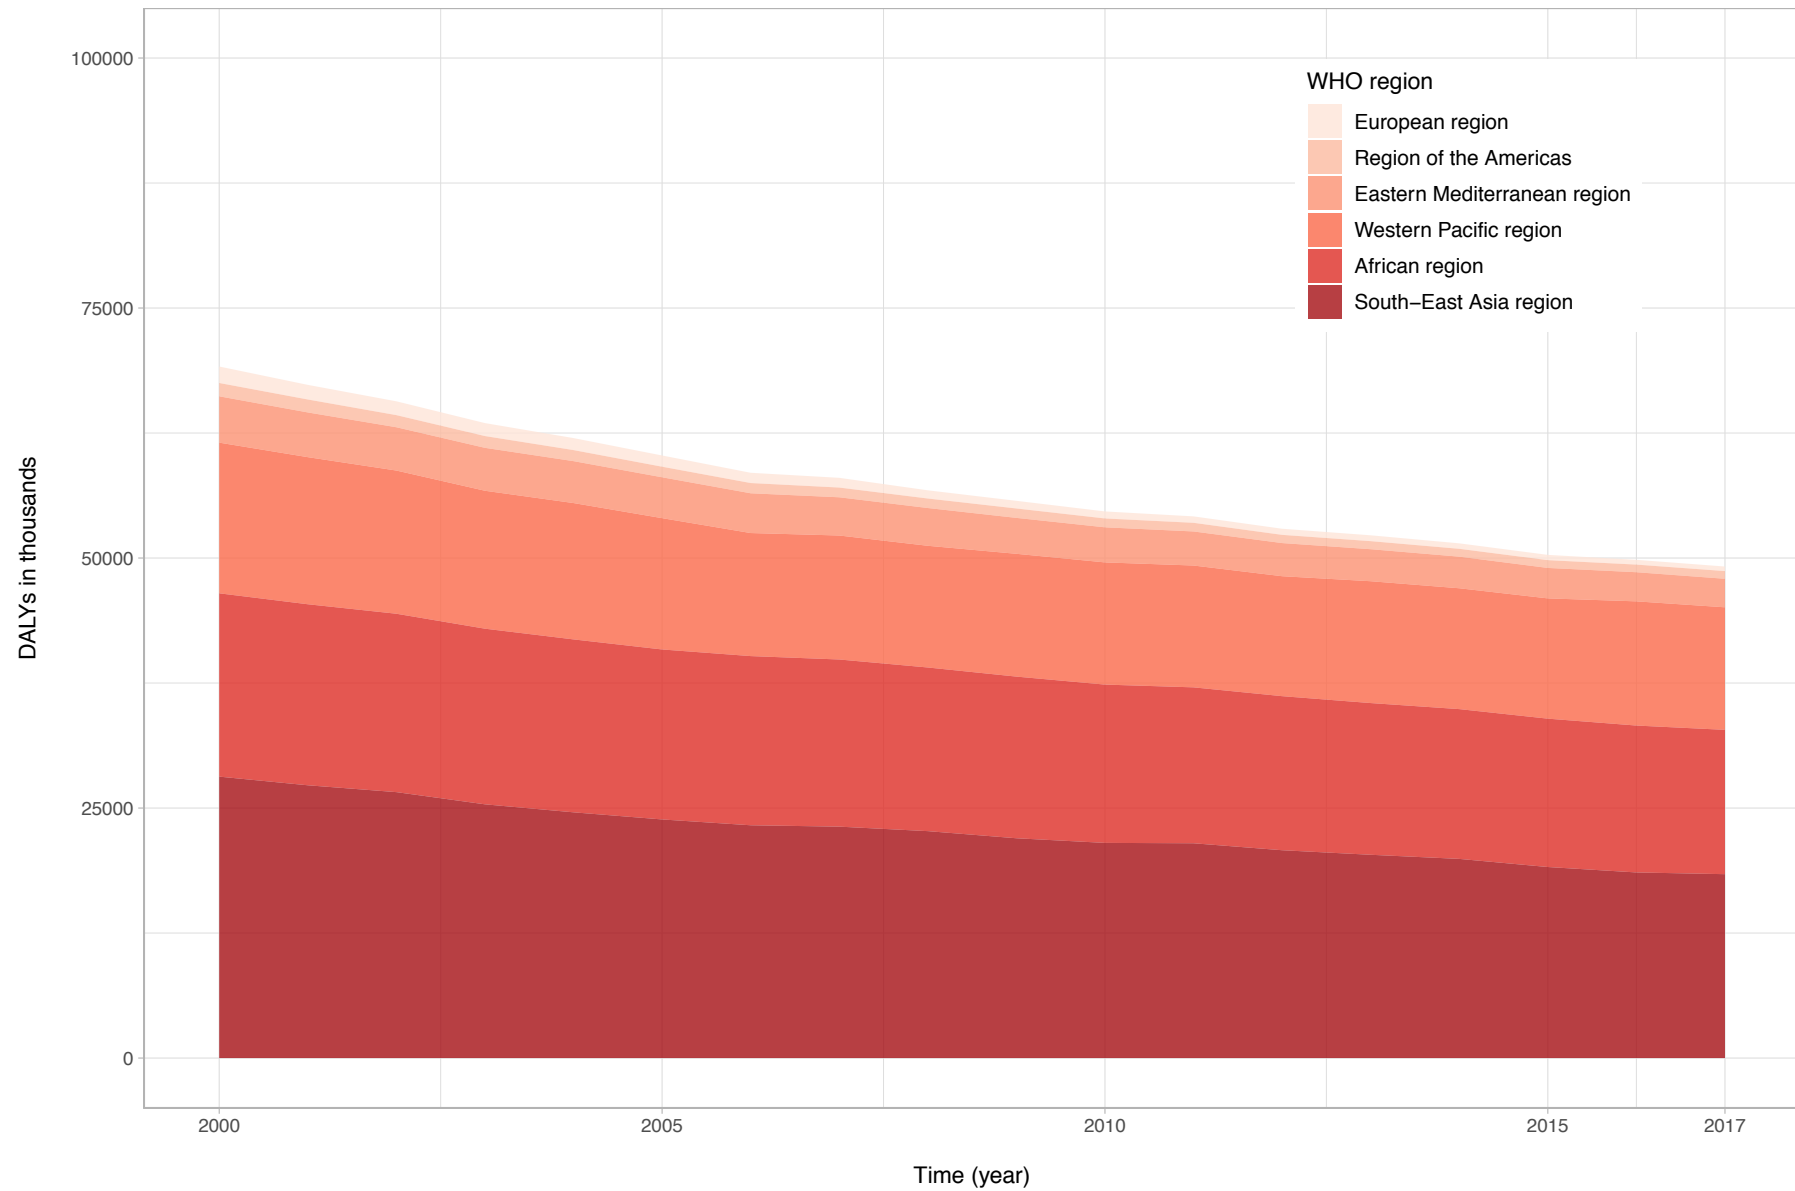

**Figure S40: Trends in burden attributable to household air pollution using pooled risk ratios from studies that were assessed to be at low or moderate risk of bias stratified by WHO regions**

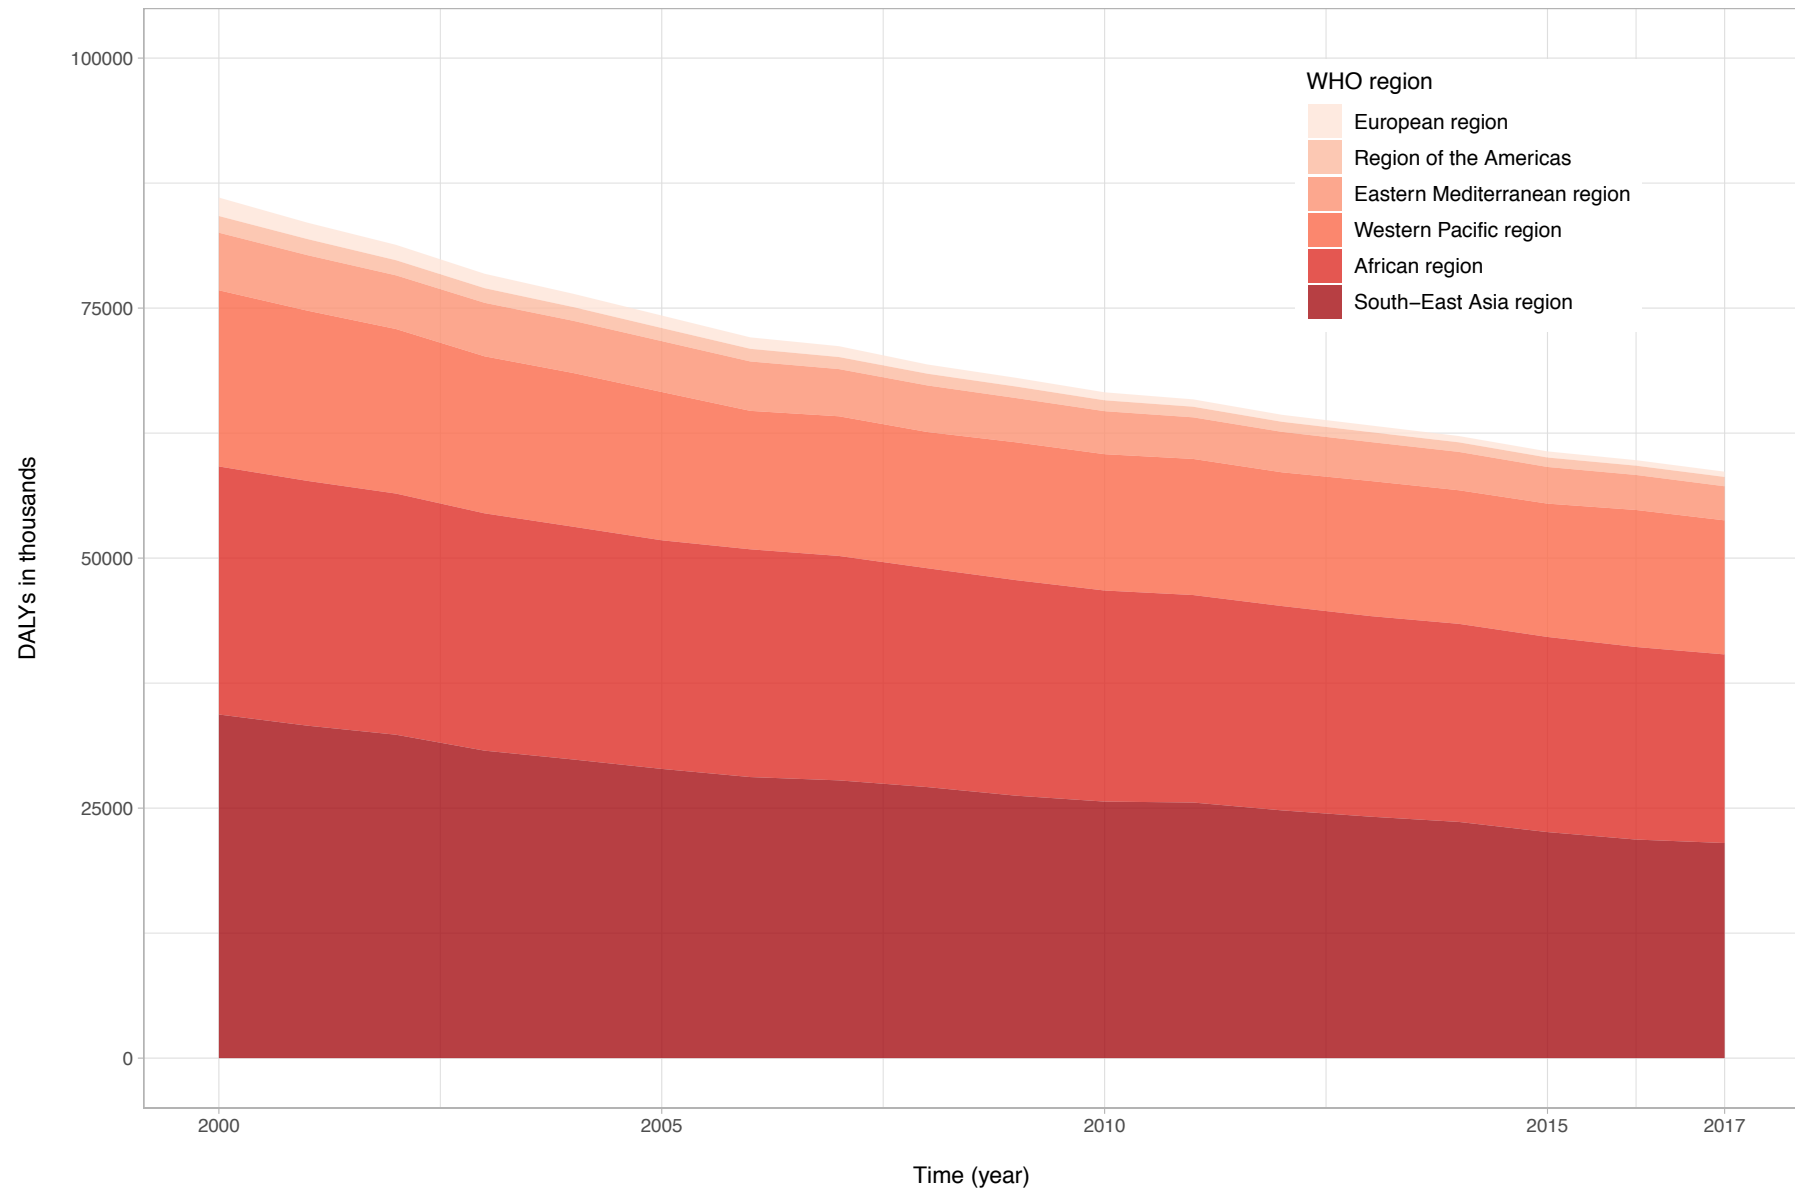

**Table S1: PRISMA Checklist**

| Section/topic                      | #  | Checklist item                                                                                                                                                                                                                                                                                              | Reported on page #   |
|------------------------------------|----|-------------------------------------------------------------------------------------------------------------------------------------------------------------------------------------------------------------------------------------------------------------------------------------------------------------|----------------------|
| <b>TITLE</b>                       |    |                                                                                                                                                                                                                                                                                                             |                      |
| Title                              | 1  | Identify the report as a systematic review, meta-analysis, or both.                                                                                                                                                                                                                                         |                      |
| <b>ABSTRACT</b>                    |    |                                                                                                                                                                                                                                                                                                             |                      |
| Structured summary                 | 2  | Provide a structured summary including, as applicable: background; objectives; data sources; study eligibility criteria, participants, and interventions; study appraisal and synthesis methods; results; limitations; conclusions and implications of key findings; systematic review registration number. | 2                    |
| <b>INTRODUCTION</b>                |    |                                                                                                                                                                                                                                                                                                             |                      |
| Rationale                          | 3  | Describe the rationale for the review in the context of what is already known.                                                                                                                                                                                                                              | 3                    |
| Objectives                         | 4  | Provide an explicit statement of questions being addressed with reference to participants, interventions, comparisons, outcomes, and study design (PICOS).                                                                                                                                                  | 3                    |
| <b>METHODS</b>                     |    |                                                                                                                                                                                                                                                                                                             |                      |
| Protocol and registration          | 5  | Indicate if a review protocol exists, if and where it can be accessed (e.g., Web address), and, if available, provide registration information including registration number.                                                                                                                               | 1                    |
| Eligibility criteria               | 6  | Specify study characteristics (e.g., PICOS, length of follow-up) and report characteristics (e.g., years considered, language, publication status) used as criteria for eligibility, giving rationale.                                                                                                      | Supplementary text 1 |
| Information sources                | 7  | Describe all information sources (e.g., databases with dates of coverage, contact with study authors to identify additional studies) in the search and date last searched.                                                                                                                                  | Supplementary text 1 |
| Search                             | 8  | Present full electronic search strategy for at least one database, including any limits used, such that it could be repeated.                                                                                                                                                                               | Supplementary text 1 |
| Study selection                    | 9  | State the process for selecting studies (i.e., screening, eligibility, included in systematic review, and, if applicable, included in the meta-analysis).                                                                                                                                                   | Supplementary text 1 |
| Data collection process            | 10 | Describe method of data extraction from reports (e.g., piloted forms, independently, in duplicate) and any processes for obtaining and confirming data from investigators.                                                                                                                                  | Supplementary text 1 |
| Data items                         | 11 | List and define all variables for which data were sought (e.g., PICOS, funding sources) and any assumptions and simplifications made.                                                                                                                                                                       | 4                    |
| Risk of bias in individual studies | 12 | Describe methods used for assessing risk of bias of individual studies (including specification of whether this was done at the study or outcome level), and how this information is to be used in any data synthesis.                                                                                      | Supplementary text 1 |

|                               |    |                                                                                                                                                                                                          |                           |
|-------------------------------|----|----------------------------------------------------------------------------------------------------------------------------------------------------------------------------------------------------------|---------------------------|
| Summary measures              | 13 | State the principal summary measures (e.g., risk ratio, difference in means).                                                                                                                            | 4                         |
| Synthesis of results          | 14 | Describe the methods of handling data and combining results of studies, if done, including measures of consistency (e.g., $I^2$ ) for each meta-analysis.                                                | 5                         |
| Risk of bias across studies   | 15 | Specify any assessment of risk of bias that may affect the cumulative evidence (e.g., publication bias, selective reporting within studies).                                                             | 5                         |
| Additional analyses           | 16 | Describe methods of additional analyses (e.g., sensitivity or subgroup analyses, meta-regression), if done, indicating which were pre-specified.                                                         | 5                         |
| <b>RESULTS</b>                |    |                                                                                                                                                                                                          |                           |
| Study selection               | 17 | Give numbers of studies screened, assessed for eligibility, and included in the review, with reasons for exclusions at each stage, ideally with a flow diagram.                                          | 6                         |
| Study characteristics         | 18 | For each study, present characteristics for which data were extracted (e.g., study size, PICOS, follow-up period) and provide the citations.                                                             | 6, Supplementary table S1 |
| Risk of bias within studies   | 19 | Present data on risk of bias of each study and, if available, any outcome level assessment (see item 12).                                                                                                | Supplementary table S1    |
| Results of individual studies | 20 | For all outcomes considered (benefits or harms), present, for each study: (a) simple summary data for each intervention group (b) effect estimates and confidence intervals, ideally with a forest plot. | Data supplement           |
| Synthesis of results          | 21 | Present results of each meta-analysis done, including confidence intervals and measures of consistency.                                                                                                  | Figure 1                  |
| Risk of bias across studies   | 22 | Present results of any assessment of risk of bias across studies (see Item 15).                                                                                                                          | Data supplement           |
| Additional analysis           | 23 | Give results of additional analyses, if done (e.g., sensitivity or subgroup analyses, meta-regression [see Item 16]).                                                                                    | 5-7, Data supplement      |
| <b>DISCUSSION</b>             |    |                                                                                                                                                                                                          |                           |
| Summary of evidence           | 24 | Summarize the main findings including the strength of evidence for each main outcome; consider their relevance to key groups (e.g., healthcare providers, users, and policy makers).                     | 10                        |
| Limitations                   | 25 | Discuss limitations at study and outcome level (e.g., risk of bias), and at review-level (e.g., incomplete retrieval of identified research, reporting bias).                                            | 10-11                     |
| Conclusions                   | 26 | Provide a general interpretation of the results in the context of other evidence, and implications for future research.                                                                                  | 11-13                     |
| <b>FUNDING</b>                |    |                                                                                                                                                                                                          |                           |
| Funding                       | 27 | Describe sources of funding for the systematic review and other support (e.g., supply of data); role of funders for the systematic review.                                                               | 14                        |



**Table S2: List of countries and World Bank income group stratified by WHO regions****1) African region**

| Country                                 | ISO3 code  | Income group        |
|-----------------------------------------|------------|---------------------|
| <b>Benin</b>                            | <b>BEN</b> | Low income          |
| <b>Burkina Faso</b>                     | BFA        | Low income          |
| <b>Burundi</b>                          | BDI        | Low income          |
| <b>Central African Republic</b>         | CAF        | Low income          |
| <b>Chad</b>                             | TCD        | Low income          |
| <b>Comoros</b>                          | COM        | Low income          |
| <b>Democratic Republic of the Congo</b> | COD        | Low income          |
| <b>Eritrea</b>                          | ERI        | Low income          |
| <b>Ethiopia</b>                         | ETH        | Low income          |
| <b>Gambia</b>                           | GMB        | Low income          |
| <b>Guinea</b>                           | GIN        | Low income          |
| <b>Guinea-Bissau</b>                    | GNB        | Low income          |
| <b>Liberia</b>                          | LBR        | Low income          |
| <b>Madagascar</b>                       | MDG        | Low income          |
| <b>Malawi</b>                           | MWI        | Low income          |
| <b>Mali</b>                             | MLI        | Low income          |
| <b>Mozambique</b>                       | MOZ        | Low income          |
| <b>Niger</b>                            | NER        | Low income          |
| <b>Rwanda</b>                           | RWA        | Low income          |
| <b>Senegal</b>                          | SEN        | Low income          |
| <b>Sierra Leone</b>                     | SLE        | Low income          |
| <b>South Sudan</b>                      | SSD        | Low income          |
| <b>Togo</b>                             | TGO        | Low income          |
| <b>Uganda</b>                           | UGA        | Low income          |
| <b>United Republic of Tanzania</b>      | TZA        | Low income          |
| <b>Zimbabwe</b>                         | ZWE        | Low income          |
| <b>Angola</b>                           | AGO        | Lower middle income |
| <b>Cabo Verde</b>                       | CPV        | Lower middle income |
| <b>Cameroon</b>                         | CMR        | Lower middle income |
| <b>Congo</b>                            | COG        | Lower middle income |
| <b>Cote d'Ivoire</b>                    | CIV        | Lower middle income |
| <b>Ghana</b>                            | GHA        | Lower middle income |
| <b>Kenya</b>                            | KEN        | Lower middle income |
| <b>Lesotho</b>                          | LSO        | Lower middle income |
| <b>Mauritania</b>                       | MRT        | Lower middle income |
| <b>Nigeria</b>                          | NGA        | Lower middle income |
| <b>Swaziland</b>                        | SWZ        | Lower middle income |
| <b>Zambia</b>                           | ZMB        | Lower middle income |
| <b>Algeria</b>                          | DZA        | Upper middle income |
| <b>Botswana</b>                         | BWA        | Upper middle income |

|                          |     |                     |
|--------------------------|-----|---------------------|
| <b>Equatorial Guinea</b> | GNQ | Upper middle income |
| <b>Gabon</b>             | GAB | Upper middle income |
| <b>Mauritius</b>         | MUS | Upper middle income |
| <b>Namibia</b>           | NAM | Upper middle income |
| <b>South Africa</b>      | ZAF | Upper middle income |
| <b>Seychelles</b>        | SYC | High income         |

## 2) Region of the Americas

| <b>Country</b>                            | <b>ISO3 code</b> | <b>Income group</b> |
|-------------------------------------------|------------------|---------------------|
| <b>Haiti</b>                              | HTI              | Low income          |
| <b>Bolivia (Plurinational State of)</b>   | BOL              | Lower middle income |
| <b>El Salvador</b>                        | SLV              | Lower middle income |
| <b>Honduras</b>                           | HND              | Lower middle income |
| <b>Nicaragua</b>                          | NIC              | Lower middle income |
| <b>Belize</b>                             | BLZ              | Upper middle income |
| <b>Brazil</b>                             | BRA              | Upper middle income |
| <b>Colombia</b>                           | COL              | Upper middle income |
| <b>Costa Rica</b>                         | CRI              | Upper middle income |
| <b>Cuba</b>                               | CUB              | Upper middle income |
| <b>Dominica</b>                           | DMA              | Upper middle income |
| <b>Dominican Republic</b>                 | DOM              | Upper middle income |
| <b>Ecuador</b>                            | ECU              | Upper middle income |
| <b>Grenada</b>                            | GRD              | Upper middle income |
| <b>Guatemala</b>                          | GTM              | Upper middle income |
| <b>Guyana</b>                             | GUY              | Upper middle income |
| <b>Jamaica</b>                            | JAM              | Upper middle income |
| <b>Mexico</b>                             | MEX              | Upper middle income |
| <b>Paraguay</b>                           | PRY              | Upper middle income |
| <b>Peru</b>                               | PER              | Upper middle income |
| <b>Saint Lucia</b>                        | LCA              | Upper middle income |
| <b>Saint Vincent and the Grenadines</b>   | VCT              | Upper middle income |
| <b>Suriname</b>                           | SUR              | Upper middle income |
| <b>Venezuela (Bolivarian Republic of)</b> | VEN              | Upper middle income |
| <b>Antigua and Barbuda</b>                | ATG              | High income         |
| <b>Argentina</b>                          | ARG              | High income         |
| <b>Barbados</b>                           | BRB              | High income         |
| <b>Chile</b>                              | CHL              | High income         |
| <b>Panama</b>                             | PAN              | High income         |
| <b>Trinidad and Tobago</b>                | TTO              | High income         |
| <b>Uruguay</b>                            | URY              | High income         |
| <b>Bahamas</b>                            | BHS              | High income         |
| <b>Canada</b>                             | CAN              | High income         |
| <b>United States of America</b>           | USA              | High income         |

### 3) South-East Asia Region

| Country                               | ISO3 code | Income group        |
|---------------------------------------|-----------|---------------------|
| Democratic People's Republic of Korea | PRK       | Low income          |
| Nepal                                 | NPL       | Low income          |
| Bangladesh                            | BGD       | Lower middle income |
| Bhutan                                | BTN       | Lower middle income |
| India                                 | IND       | Lower middle income |
| Indonesia                             | IDN       | Lower middle income |
| Myanmar                               | MMR       | Lower middle income |
| Sri Lanka                             | LKA       | Lower middle income |
| Timor-Leste                           | TLS       | Lower middle income |
| Maldives                              | MDV       | Upper middle income |
| Thailand                              | THA       | Upper middle income |

### 4) European Region

| Country                                   | ISO3 code | Income group        |
|-------------------------------------------|-----------|---------------------|
| Tajikistan                                | TJK       | Low income          |
| Georgia                                   | GEO       | Lower middle income |
| Kyrgyzstan                                | KGZ       | Lower middle income |
| Republic of Moldova                       | MDA       | Lower middle income |
| Ukraine                                   | UKR       | Lower middle income |
| Uzbekistan                                | UZB       | Lower middle income |
| Albania                                   | ALB       | Upper middle income |
| Armenia                                   | ARM       | Upper middle income |
| Azerbaijan                                | AZE       | Upper middle income |
| Belarus                                   | BLR       | Upper middle income |
| Bosnia and Herzegovina                    | BIH       | Upper middle income |
| Bulgaria                                  | BGR       | Upper middle income |
| Kazakhstan                                | KAZ       | Upper middle income |
| Montenegro                                | MNE       | Upper middle income |
| Romania                                   | ROU       | Upper middle income |
| Russian Federation                        | RUS       | Upper middle income |
| Serbia                                    | SRB       | Upper middle income |
| The former Yugoslav Republic of Macedonia | MKD       | Upper middle income |
| Turkey                                    | TUR       | Upper middle income |
| Turkmenistan                              | TKM       | Upper middle income |
| Croatia                                   | HRV       | High income         |
| Czechia                                   | CZE       | High income         |
| Estonia                                   | EST       | High income         |
| Greece                                    | GRC       | High income         |
| Latvia                                    | LVA       | High income         |
| Slovakia                                  | SVK       | High income         |

|                       |     |             |
|-----------------------|-----|-------------|
| <b>Slovenia</b>       | SVN | High income |
| <b>Andorra</b>        | AND | High income |
| <b>Austria</b>        | AUT | High income |
| <b>Belgium</b>        | BEL | High income |
| <b>Cyprus</b>         | CYP | High income |
| <b>Denmark</b>        | DNK | High income |
| <b>Finland</b>        | FIN | High income |
| <b>France</b>         | FRA | High income |
| <b>Germany</b>        | DEU | High income |
| <b>Hungary</b>        | HUN | High income |
| <b>Iceland</b>        | ISL | High income |
| <b>Ireland</b>        | IRL | High income |
| <b>Israel</b>         | ISR | High income |
| <b>Italy</b>          | ITA | High income |
| <b>Lithuania</b>      | LTU | High income |
| <b>Luxembourg</b>     | LUX | High income |
| <b>Malta</b>          | MLT | High income |
| <b>Netherlands</b>    | NLD | High income |
| <b>Norway</b>         | NOR | High income |
| <b>Poland</b>         | POL | High income |
| <b>Portugal</b>       | PRT | High income |
| <b>Spain</b>          | ESP | High income |
| <b>Sweden</b>         | SWE | High income |
| <b>Switzerland</b>    | CHE | High income |
| <b>United Kingdom</b> | GBR | High income |

#### 5) Eastern Mediterranean Region

| <b>Country</b>                    | <b>ISO3 code</b> | <b>Income group</b> |
|-----------------------------------|------------------|---------------------|
| <b>Afghanistan</b>                | AFG              | Low income          |
| <b>Somalia</b>                    | SOM              | Low income          |
| <b>Syrian Arab Republic</b>       | SYR              | Low income          |
| <b>Yemen</b>                      | YEM              | Low income          |
| <b>Djibouti</b>                   | DJI              | Lower middle income |
| <b>Egypt</b>                      | EGY              | Lower middle income |
| <b>Morocco</b>                    | MAR              | Lower middle income |
| <b>Pakistan</b>                   | PAK              | Lower middle income |
| <b>Sudan</b>                      | SDN              | Lower middle income |
| <b>Tunisia</b>                    | TUN              | Lower middle income |
| <b>Iran (Islamic Republic of)</b> | IRN              | Upper middle income |
| <b>Iraq</b>                       | IRQ              | Upper middle income |
| <b>Jordan</b>                     | JOR              | Upper middle income |
| <b>Oman</b>                       | OMN              | High income         |
| <b>Qatar</b>                      | QAT              | High income         |
| <b>Saudi Arabia</b>               | SAU              | High income         |

|                             |     |             |
|-----------------------------|-----|-------------|
| <b>United Arab Emirates</b> | ARE | High income |
| <b>Bahrain</b>              | BHR | High income |
| <b>Kuwait</b>               | KWT | High income |

#### 6) Western Pacific Region

| <b>Country</b>                          | <b>ISO3 code</b> | <b>Income group</b> |
|-----------------------------------------|------------------|---------------------|
| <b>Cambodia</b>                         | KHM              | Lower middle income |
| <b>Kiribati</b>                         | KIR              | Lower middle income |
| <b>Lao People's Democratic Republic</b> | LAO              | Lower middle income |
| <b>Micronesia (Federated States of)</b> | FSM              | Lower middle income |
| <b>Mongolia</b>                         | MNG              | Lower middle income |
| <b>Papua New Guinea</b>                 | PNG              | Lower middle income |
| <b>Philippines</b>                      | PHL              | Lower middle income |
| <b>Solomon Islands</b>                  | SLB              | Lower middle income |
| <b>Vanuatu</b>                          | VUT              | Lower middle income |
| <b>Viet Nam</b>                         | VNM              | Lower middle income |
| <b>China</b>                            | CHN              | Upper middle income |
| <b>Fiji</b>                             | FJI              | Upper middle income |
| <b>Malaysia</b>                         | MYS              | Upper middle income |
| <b>Marshall Islands</b>                 | MHL              | Upper middle income |
| <b>Samoa</b>                            | WSM              | Upper middle income |
| <b>Tonga</b>                            | TON              | Upper middle income |
| <b>Republic of Korea</b>                | KOR              | High income         |
| <b>Australia</b>                        | AUS              | High income         |
| <b>Brunei Darussalam</b>                | BRN              | High income         |
| <b>Japan</b>                            | JPN              | High income         |
| <b>New Zealand</b>                      | NZL              | High income         |
| <b>Singapore</b>                        | SGP              | High income         |

**Table S3: Baseline details of included studies**

Abbreviations: LPG= liquid petroleum gas, COPD= chronic obstructive pulmonary disease, NA= not applicable.

\* Mean age or range of ages are in years, unless otherwise stated

| Author                       | Publication year | Country                                                                                                                                                                                                                | Study design               | Sample size | Men, % | Age*         | Fuel type in exposed group                                                                        | Fuel type in control group                                       | Outcomes assessed                    | Risk of bias |
|------------------------------|------------------|------------------------------------------------------------------------------------------------------------------------------------------------------------------------------------------------------------------------|----------------------------|-------------|--------|--------------|---------------------------------------------------------------------------------------------------|------------------------------------------------------------------|--------------------------------------|--------------|
| Abusalah et al <sup>2</sup>  | 2012             | Palestine                                                                                                                                                                                                              | case-control               | 446         | 0      | 26.8         | wood                                                                                              | not exposed to wood                                              | low birth weight                     | low          |
| Acharya et al <sup>3</sup>   | 2015             | Nepal                                                                                                                                                                                                                  | case-control               | 4802        | 52.1   | under 5      | solid fuel (wood, animal dung, straw, shrubs, grass, crop residue, coal, lignite and charcoal)    | cleaner fuel                                                     | acute respiratory infection          | high         |
| Adane et al <sup>4</sup>     | 2020             | Ethiopia                                                                                                                                                                                                               | cross-sectional            | 5830        | 51.7   | under 5      | biomass fuel                                                                                      | biomass fuel                                                     | acute lower respiratory infection    | moderate     |
| Addo-Yobo et al <sup>5</sup> | 2001             | Ghana                                                                                                                                                                                                                  | case-control               | 96          | 50     | 13.3         | electricity                                                                                       | charcoal, firewood, liquefied petroleum gas, and kerosene        | asthma                               | high         |
| Adesanya et al <sup>6</sup>  | 2016             | Nigeria                                                                                                                                                                                                                | case-control               | 28596       | 50.1   | under 5      | biomass fuel                                                                                      | kerosene/charcoal                                                | acute respiratory infection          | high         |
| Adeyemi et al <sup>7</sup>   | 2016             | Nigeria                                                                                                                                                                                                                | case-control               | 27983       | 0      | 27.3         | firewood/dung                                                                                     | LPG/kerosene                                                     | low birth weight                     | moderate     |
| Admasie et al <sup>8</sup>   | 2018             | Ethiopia                                                                                                                                                                                                               | case-control               | 1144        | 52.97  | under 5      | unclean fuel                                                                                      | clean fuel                                                       | acute respiratory infection          | high         |
| Admasie et al <sup>8</sup>   | 2018             | Ethiopia                                                                                                                                                                                                               | cross-sectional study      | 1042        | 54.4   | 2.0          | biomass/charcoal                                                                                  | electricity                                                      | low birth weight                     | moderate     |
| Aggarwal et al <sup>9</sup>  | 2006             | India                                                                                                                                                                                                                  | case-control               | 73605       | 52     | not reported | LPG, kerosene, solid fuel                                                                         | no self cooking                                                  | asthma                               | high         |
| Agrawal et al <sup>10</sup>  | 2012             | India                                                                                                                                                                                                                  | retrospective cohort study | 156316      | 36.3   | 20-49        | biomass fuel, solid fuel                                                                          | cleaner fuel                                                     | asthma                               | high         |
| Akhtar et al <sup>11</sup>   | 2007             | Pakistan                                                                                                                                                                                                               | case-control               | 74918       | 50.8   | 31.3         | wood, dung cake, rice straw, kai grass                                                            | LPG                                                              | chronic bronchitis                   | high         |
| Akinyemi et al <sup>12</sup> | 2016             | 15 sub-Saharan African countries (Burkino Faso, Burundi, Comoros, Congo (Brazzaville), Congo Democratic Republic, Cote d'Ivoire, Gabon, Lesotho, Madagascar, Mozambique, Namibia, Niger, Rwanda, Sierra Leone, Zambia) | case-control               | 143602      | 50.4   | under 5      | solid fuel (coal, lignite, charcoal, wood, straw/shrubs/grass, agricultural crop and animal dung) | non-solid fuel (electricity, LPG, natural gas, biogas, kerosene) | infant mortality and child mortality | high         |
| Akinyemi et al <sup>13</sup> | 2018             | Nigeria                                                                                                                                                                                                                | cross-sectional            | 59370       | 50.3   | under 5      | unclean                                                                                           | clean                                                            | Acute respiratory infection          | high         |

|                                        |      |                |                             |        |       |              |                                                                              |                                         |                                                                                                      |          |
|----------------------------------------|------|----------------|-----------------------------|--------|-------|--------------|------------------------------------------------------------------------------|-----------------------------------------|------------------------------------------------------------------------------------------------------|----------|
| <b>Alam et al<sup>14</sup></b>         | 2012 | Bangladesh     | retrospective cohort study  | 946    | 56.2  | 64.9         | solid fuel                                                                   | LPG                                     | cardiovascular mortality, ischaemic heart disease mortality, stroke mortality, respiratory mortality | high     |
| <b>Alam et al<sup>15</sup></b>         | 2015 | Bangladesh     | cross-sectional             | 3759   | 46    | 54.0         | solid fuel                                                                   | LPG                                     | COPD                                                                                                 | low      |
| <b>Aldous et al<sup>16</sup></b>       | 1996 | USA            | prospective cohort study    | 936    | NA    | under 1      | LPG                                                                          | electricity                             | acute respiratory infection                                                                          | high     |
| <b>Alemayehu et al<sup>17</sup></b>    | 2014 | Ethiopia       | cross-sectional             | 715    | 51.3  | 2.4          | High/medium pollution fuel                                                   | Low pollution fuel                      | acute respiratory infection                                                                          | high     |
| <b>Alemayehu et al<sup>18</sup></b>    | 2019 | Ethiopia       | case-control                | 288    | 55.5  | under 5      | cow dung                                                                     | no cow dung                             | Acute respiratory infection                                                                          | high     |
| <b>Alexander et al<sup>19</sup></b>    | 2018 | Nigeria        | Randomised-controlled trial | 324    | 0     | 28.0         | ethanol cook stove                                                           | firewood or kerosene stove              | stillbirth and birth weight                                                                          | high     |
| <b>Alim et al<sup>20</sup></b>         | 2014 | Bangladesh     | cross-sectional             | 420    | 0     | not reported | biomass fuel                                                                 | gas                                     | any respiratory involvement                                                                          | high     |
| <b>Alvis-Guzman et al<sup>21</sup></b> | 2013 | Colombia       | cross-sectional             | 203    | 25.4  | not reported | biomass fuel                                                                 | LPG                                     | COPD                                                                                                 | low      |
| <b>Amegah et al<sup>22</sup></b>       | 2012 | Ghana          | cross-sectional             | 592    | NA    | not reported | charcoal                                                                     | LPG                                     | low birth weight                                                                                     | low      |
| <b>Anteneh et al<sup>23</sup></b>      | 2020 | Ethiopia       | cross-sectional             | 10006  | 51    | 0-59 months  | wood, straw, agricultural products, kerosene, charcoal, animal dung,         | electricity, gas                        | acute respiratory infection                                                                          | high     |
| <b>Arinola et al<sup>24</sup></b>      | 2018 | Nigeria        | cross-sectional study       | 68     | 0     | 30.2         | kerosene                                                                     | liquefied natural gas                   | low birth weight                                                                                     | high     |
| <b>Arlington et al<sup>25</sup></b>    | 2019 | India          | prospective cohort study    | 1586   | 50.76 | 0-6 months   | wood, straw, shrubs, grass, agricultural crop, animal dung, coal or charcoal | iquid petroleum gas or electricity      | acute lower respiratory infections                                                                   | high     |
| <b>Aung et al<sup>26</sup></b>         | 2013 | Myanmar        | case-control                | 358    | 65.3  | 6.7          | smoke producing fuel                                                         | no smoke producing fuel                 | acute respiratory infection                                                                          | moderate |
| <b>Awasthi et al<sup>27</sup></b>      | 1996 | India          | cohort study                | 664    | 56    | under 4.5    | coal, wood, kerosene, dung                                                   | LPG                                     | Respiratory symptom complex                                                                          | high     |
| <b>Azad et al<sup>28</sup></b>         | 2014 | Bangladesh     | cross-sectional             | 145    | 61.8  | 7.0          | wood                                                                         | no wood                                 | acute respiratory infection                                                                          | high     |
| <b>Azizi et al<sup>29</sup></b>        | 1991 | Malaysia       | cross-sectional             | 1501   | 57.3  | 9.0          | wood/kerosene stove                                                          | electric/gas stove                      | Asthma, persistent wheeze                                                                            | high     |
| <b>Azizi et al<sup>30</sup></b>        | 1995 | Malaysia       | case-control                | 359    | 57.4  | 3.0          | kerosene, wood                                                               | no kerosene or wood                     | asthma                                                                                               | high     |
| <b>Baker et al<sup>31</sup></b>        | 2006 | Czech Republic | cohort study                | 452    | 55.3  | 1.5          | coal use for heating                                                         | Distant heat + other                    | Lower Respiratory Illness                                                                            | low      |
| <b>Balakrishnan et al<sup>32</sup></b> | 2018 | India          | cohort study                | 1125   | 0     | 0.0          | solid fuel                                                                   | LPG                                     | birth weight                                                                                         | low      |
| <b>Barone-Adesi et al<sup>33</sup></b> | 2012 | China          | retrospective cohort study  | 37272  | 52.7  | 56.7         | smoky coal (bituminous)                                                      | smokeless coal (anthracite)             | lung cancer                                                                                          | low      |
| <b>Barria et al<sup>34</sup></b>       | 2008 | Chile          | cohort study                | 316    | 50.6  | 0.0          | wood                                                                         | Not exclusively using wood              | acute lower respiratory illness                                                                      | high     |
| <b>Barry et al<sup>35</sup></b>        | 2010 | USA            | cohort study                | 508    | 59.4  | 57.0         | wood/coal                                                                    | Not using wood/coal for cooking/heating | asthma                                                                                               | high     |
| <b>Bassani et al<sup>36</sup></b>      | 2010 | India          | case-control                | 482763 | 52    | under 4      | solid fuel                                                                   | Non-solid fuels                         | death                                                                                                | moderate |

|                                    |      |                                                                                                                                                                                                    |                          |       |      |            |                                                                                      |                                                                         |                                                                                                               |          |
|------------------------------------|------|----------------------------------------------------------------------------------------------------------------------------------------------------------------------------------------------------|--------------------------|-------|------|------------|--------------------------------------------------------------------------------------|-------------------------------------------------------------------------|---------------------------------------------------------------------------------------------------------------|----------|
| <b>Bassig et al<sup>37</sup></b>   | 2019 | China                                                                                                                                                                                              | prospective cohort study | 16323 | 0    | 39.4       | smokeless coal users                                                                 | smoky coal users                                                        | mortality from ischaemic heart disease or stroke                                                              | moderate |
| <b>Bates et al<sup>38</sup></b>    | 2013 | Nepal                                                                                                                                                                                              | case-control             | 917   | 56.7 | 1.5        | kerosene, biomass, gas, wood or coal                                                 | Electricity, gas or none                                                | acute lower respiratory illness                                                                               | high     |
| <b>Bates et al<sup>39</sup></b>    | 2018 | Nepal                                                                                                                                                                                              | case-control             | 824   | 56   | 1.5        | PM2.5 concentration                                                                  | NA                                                                      | acute lower respiratory illness                                                                               | high     |
| <b>Bates et al<sup>39</sup></b>    | 2018 | Nepal                                                                                                                                                                                              | case-control             | 824   | 55.9 | 18-70      | gas/kerosene/biomass. Heating with wood/kerosene/coal/electric/gas                   | electricity, no heating                                                 | acute lower respiratory infection                                                                             | high     |
| <b>Bates et al<sup>40</sup></b>    | 2019 | Nepal                                                                                                                                                                                              | case-control             | 1807  | 53.5 | 0-36months | biogas, wood stove, kerosene, heating with solid fuels                               | lpg,no kerosene, no heating                                             | active pulmonary tuberculosis                                                                                 | moderate |
| <b>Bautista et al<sup>41</sup></b> | 2009 | Dominican Republic                                                                                                                                                                                 | cohort study             | 415   | 52.3 | under 1.5  | Charcoal                                                                             | Propane                                                                 | ALRI                                                                                                          | high     |
| <b>Behera et al<sup>42</sup></b>   | 2005 | India                                                                                                                                                                                              | case-control             | 113   | 0    | 49.4       | biomass fuel                                                                         | LPG                                                                     | lung cancer                                                                                                   | moderate |
| <b>Behera et al<sup>43</sup></b>   | 2010 | India                                                                                                                                                                                              | case-control             | 204   | 0    | 35.6       | Biomass, kerosene                                                                    | LPG                                                                     | tuberculosis                                                                                                  | moderate |
| <b>Behrens et al<sup>44</sup></b>  | 2005 | Germany                                                                                                                                                                                            | cross-sectional          | 6996  | 51.7 | 6-7        | gas,coal, oil, wood                                                                  | no gas, no coal, no oil, no wood                                        | wheezing and atopic symptoms                                                                                  | high     |
| <b>Belanger et al<sup>45</sup></b> | 2003 | USA                                                                                                                                                                                                | prospective cohort study | 849   | 48.3 | under 1    | wood stove, gas stove, NO2 concentration                                             | no exposure to wood stove, gas stove                                    | respiratory symptoms                                                                                          | high     |
| <b>Belanger et al<sup>46</sup></b> | 2006 | USA                                                                                                                                                                                                | case-control             | 728   | 62.4 | under 12   | gas stove and NO2 concentration                                                      | no gas stove                                                            | respiratory symptoms in children with asthma (wheeze, persistent cough, shortness of breath, chest tightness) | high     |
| <b>Belanger et al<sup>47</sup></b> | 2013 | USA                                                                                                                                                                                                | prospective cohort study | 1342  | 59   | 5-10       | NO2 concentration                                                                    | NA                                                                      | asthma                                                                                                        | high     |
| <b>Bhat et al<sup>48</sup></b>     | 2012 | india                                                                                                                                                                                              | case-control             | 202   | 52.5 | under 5    | fuel other than LPG                                                                  | LPG                                                                     | acute respiratory infection                                                                                   | high     |
| <b>Bhat et al<sup>49</sup></b>     | 2013 | India                                                                                                                                                                                              | case-control             | 214   | 55.6 | under 5    | fuel other than LPG                                                                  | LPG                                                                     | acute respiratory infection                                                                                   | moderate |
| <b>Boadi et al<sup>50</sup></b>    | 2006 | Ghana                                                                                                                                                                                              | cross-sectional          | 948   | 0    | 32.4       | charcoal, firewood, kerosene, LPG                                                    | LPG, electricity                                                        | respiratory infection                                                                                         | high     |
| <b>Bothwell et al<sup>51</sup></b> | 2003 | Northern Ireland                                                                                                                                                                                   | cross-sectional          | 2578  | NA   | under 12   | glass-fronted solid fuel fire                                                        | no glass-fronted solid fuel heating                                     | asthma and asthma symptoms (wheeze, cough and inhaler use)                                                    | high     |
| <b>Boy et al<sup>52</sup></b>      | 2002 | Guatemala                                                                                                                                                                                          | prospective cohort study | 1717  | 0    | 25.0       | wood                                                                                 | electricity, LPG                                                        | birth weight                                                                                                  | low      |
| <b>Broor et al<sup>53</sup></b>    | 2001 | India                                                                                                                                                                                              | case-control             | 512   | 70   | under 5    | cooking fuel other than LPG                                                          | LPG                                                                     | severe acute lower respiratory infection                                                                      | high     |
| <b>Bruce et al<sup>54</sup></b>    | 1998 | Guatemala                                                                                                                                                                                          | cross-sectional          | 321   | 0    | 28.0       | plancha                                                                              | open fire                                                               | respiratory symptoms                                                                                          | high     |
| <b>Buchner et al<sup>55</sup></b>  | 2015 | Countries in Sub-Saharan Africa (Benin, Burkino Faso, Cameroon, Ethiopia, Ghana, Guinea, Kenya, Madagascar, Mali, Malawi, Mozambique, Namibia, Niger, Senegal, Tanzania, Uganda, Zambia, Zimbabwe) | cross-sectional          | 56437 | 51   | under 5    | kerosene, wood, coal, lowergrade biomass (straw, dung, grass, shrubs, crop residues) | clean fuel (electricity, LPG, gas, biogas, no food cooked in the house) | acute respiratory infection                                                                                   | high     |
| <b>Budge et al<sup>56</sup></b>    | 2014 | Peru                                                                                                                                                                                               | prospective cohort study | 892   | NA   | under 3    | improved, vented stove                                                               | open indoor fire for cooking                                            | acute respiratory infection                                                                                   | moderate |



|                                      |      |                       |                            |        |        |              |                                                                   |                                                                 |                                                                                                                                                                                                                               |          |
|--------------------------------------|------|-----------------------|----------------------------|--------|--------|--------------|-------------------------------------------------------------------|-----------------------------------------------------------------|-------------------------------------------------------------------------------------------------------------------------------------------------------------------------------------------------------------------------------|----------|
| <b>Budhathoki et al<sup>57</sup></b> | 2020 | Nepal                 | cross-sectional            | 15372  | NA     | 0-59 months  | kerosene, wood, straw, shrubs, grass, animal dung, coal, charcoal | electricity, LPG (liquefied petroleum gas), biogas, natural gas | pneumonia                                                                                                                                                                                                                     | high     |
| <b>Bueso et al<sup>58</sup></b>      | 2010 | Honduras, El Salvador | cross-sectional            | 1827   | 52.215 | 1.1          | gas, kerosene, coal, firewood, other, various                     | electricity                                                     | wheeze                                                                                                                                                                                                                        | high     |
| <b>Bulkow et al<sup>59</sup></b>     | 2012 | USA                   | case-control               | 314    | 52     | under 3      | woodstove                                                         | does not use woodstove                                          | acute respiratory infection                                                                                                                                                                                                   | high     |
| <b>Burr et al<sup>60</sup></b>       | 1999 | United Kingdom        | cross-sectional            | 25393  | NA     | 12-14        | gas, solid fuel                                                   | electricity only                                                | respiratory symptoms (wheeze, speech limiting wheeze, wheeze without colds, rhinitis, spring/summer rhinitis, cough without colds, phlegm with colds, phlegm without colds, >3 colds per year, dry night cough without colds) | high     |
| <b>Buthelezi et al<sup>61</sup></b>  | 2019 | South Africa          | cross-sectional            | 245    | 39     | not reported | coal, wood, gas, paraffin                                         | electric energy source                                          | respiratory disease and symptoms                                                                                                                                                                                              | high     |
| <b>Butland et al<sup>62</sup></b>    | 1997 | United Kingdom        | case-control               | 749    | NA     | 7.5-8.5      | LPG                                                               | no LPG                                                          | asthma symptoms (wheeze)                                                                                                                                                                                                      | high     |
| <b>Cardoso et al<sup>63</sup></b>    | 2013 | Brazil                | case-control               | 321    | NA     | under 5      | wood                                                              | no domestic heating                                             | acute respiratory infection                                                                                                                                                                                                   | high     |
| <b>Cardoso et al<sup>64</sup></b>    | 2015 | Brazil                | cross-sectional            | 6081   | 51.4   | under 5      | wood, coal, other                                                 | none / LPG                                                      | acute respiratory infection                                                                                                                                                                                                   | high     |
| <b>Carlsten et al<sup>65</sup></b>   | 2011 | Canada                | case-control               | 545    | 56     | 7.0          | gas stove                                                         | not exposed to gas stove                                        | asthma                                                                                                                                                                                                                        | high     |
| <b>Casas et al<sup>66</sup></b>      | 2012 | Germany               | prospective cohort study   | 5078   | 51     | under 10     | gas                                                               | no gas                                                          | asthma                                                                                                                                                                                                                        | high     |
| <b>Cerqueiro et al<sup>67</sup></b>  | 1990 | Argentina             | case-control               | 1338   | 57.4   | under 5      | bottled gas, any fuel, charcoal                                   | no exposure to bottled gas, any fuel, charcoal                  | lower respiratory infection                                                                                                                                                                                                   | low      |
| <b>Cetinkaya et al<sup>68</sup></b>  | 2000 | Turkey                | cross-sectional            | 1023   | 45.1   | not reported | biomass fuel                                                      | no biomass fuel                                                 | chronic bronchitis                                                                                                                                                                                                            | high     |
| <b>Chan et al<sup>69</sup></b>       | 2019 | China                 | prospective cohort study   | 277838 | 9      | 50.3         | coal, wood, charcoal                                              | electricity, gas                                                | respiratory diseases and death from any respiratory disease                                                                                                                                                                   | low      |
| <b>Chen et al<sup>70</sup></b>       | 1990 | Taiwan                | case-control               | 931    | 79.1   | not reported | wood and coal                                                     | charcoal, LPG, electricity                                      | lung cancer                                                                                                                                                                                                                   | moderate |
| <b>Chen et al<sup>71</sup></b>       | 2018 | Taiwan                | cross-sectional            | 644    | 0      | 63.2         | biomass fuel, coal                                                | gas/electric stove                                              | chronic bronchitis and COPD                                                                                                                                                                                                   | low      |
| <b>Chen et al<sup>71</sup></b>       | 2018 | China                 | cross-sectional            | 1940   | 55     | 0-18         | coal, wood, charcoal                                              | electricity, kerosene, liquefied or natural gas                 | acute respiratory infection in the past four weeks                                                                                                                                                                            | high     |
| <b>Choi et al<sup>72</sup></b>       | 2015 | India                 | cross-sectional            | 1392   | NA     | not reported | kerosene                                                          | LPG                                                             | bronchitis                                                                                                                                                                                                                    | high     |
| <b>Clark et al<sup>73</sup></b>      | 2009 | Honduras              | cross-sectional            | 79     | 0      | 41.5         | traditional stove and PM2.5 and CO concentration                  | improved Justa stoves                                           | respiratory symptoms (cough, phlegm, shortness of breath)                                                                                                                                                                     | high     |
| <b>Coggon et al<sup>74</sup></b>     | 1993 | UK                    | retrospective cohort study | 8812   | NA     | not reported | gas cooker                                                        | no gas cooker                                                   | mortality                                                                                                                                                                                                                     | moderate |
| <b>Coker et al<sup>75</sup></b>      | 2015 | USA                   | cross-sectional            | 3240   | NA     | under 5      | gas stove                                                         | no gas stove for heating                                        | acute respiratory infection                                                                                                                                                                                                   | high     |

|                                    |      |                                             |                 |       |       |              |                                             |                                     |                                                                                                                                                                                                  |          |
|------------------------------------|------|---------------------------------------------|-----------------|-------|-------|--------------|---------------------------------------------|-------------------------------------|--------------------------------------------------------------------------------------------------------------------------------------------------------------------------------------------------|----------|
| <b>Collings et al<sup>76</sup></b> | 1990 | Zimbabwe                                    | cross-sectional | 744   | 53.9  | 10 months    | open fire                                   | kerosene, gas, electric stoves      | lower respiratory tract infection                                                                                                                                                                | high     |
| <b>Comstock et al<sup>77</sup></b> | 1981 | USA                                         | cross-sectional | 1724  | 73.6  | not reported | LPG                                         | Electricity                         | respiratory symptoms (chronic cough, chronic phlegm, wheeze, shortness of breath, chest illness)                                                                                                 | high     |
| <b>Crampin et al<sup>78</sup></b>  | 2004 | Malawi                                      | case-control    | 1590  | 46    | not reported | wood                                        | no wood                             | tuberculosis                                                                                                                                                                                     | moderate |
| <b>da Silva et al<sup>79</sup></b> | 2012 | Brazil                                      | cross-sectional | 1402  | 41.2  | 27.8         | biomass fuel                                | LPG                                 | respiratory symptoms                                                                                                                                                                             | high     |
| <b>Dagoye et al<sup>80</sup></b>   | 2004 | Ethiopia                                    | cross-sectional | 7155  | 49    | 3.0          | kerosene                                    | no kerosene                         | wheeze                                                                                                                                                                                           | high     |
| <b>Dai et al<sup>81</sup></b>      | 1996 | China                                       | case-control    | 120   | 0     | 30-69        | coal                                        | no coal stove in bedroom            | lung adenocarcinoma                                                                                                                                                                              | moderate |
| <b>Daigler et al<sup>82</sup></b>  | 1991 | USA                                         | case-control    | 508   | 55.3  | 3.4          | woodburning stove                           | no woodburning stove                | symptoms                                                                                                                                                                                         | high     |
| <b>Das et al<sup>83</sup></b>      | 2017 | Malawi                                      | cross-sectional | 655   | 0     | 37.3         | firewood or crop residue, traditional stove | charcoal/improved stove             | cardiorespiratory symptoms (shortness of breath walking uphill, shortness of breath at rest, difficulty breathing/chest tightness, chest ains/palpitations, persistent phlegm, persistent cough) | high     |
| <b>de Oca et al<sup>84</sup></b>   | 2017 | Argentina, Colombia, Venezuela, and Uruguay | cross-sectional | 1743  | 49    | not reported | Coal or wood                                | NA                                  | COPD                                                                                                                                                                                             | high     |
| <b>Dekker et al<sup>85</sup></b>   | 1991 | Canada                                      | cross-sectional | 14059 | NA    | 5-8          | gas stove, gas and oil heating system       | no gas stove                        | asthma                                                                                                                                                                                           | high     |
| <b>Dennis et al<sup>86</sup></b>   | 1996 | Columbia                                    | case-control    | 208   | 0     | 62.5         | woodsmoke, gasoline                         | not exposed to woodsmoke            | COPD                                                                                                                                                                                             | low      |
| <b>Desalu et al<sup>87</sup></b>   | 2010 | Nigeria                                     | cross-sectional | 269   | 0     | 55.0         | biomass fuel                                | non-biomass fuel                    | respiratory symptoms (cough, chest pain, shortness of breath and wheeze) and chronic bronchitis                                                                                                  | high     |
| <b>Devien et al<sup>88</sup></b>   | 2018 | France                                      | cross-sectional | 3039  | 47    | 53.2         | gas stove, open fireplace, coal             | no gas stove, open fireplace, coal  | respiratory symptoms (wheeze and chronic cough)                                                                                                                                                  | high     |
| <b>Dhanaraj et al<sup>89</sup></b> | 2015 | India                                       | cross-sectional | 59957 | 50.5  | not reported | solid fuel                                  | smokeless fuel                      | pulmonary tuberculosis                                                                                                                                                                           | low      |
| <b>Dharmage et al<sup>90</sup></b> | 1996 | Sri Lanka                                   | case-control    | 200   | NA    | under 5      | gas, kerosene                               | not exposed to gas and kerosene oil | acute lower respiratory infection                                                                                                                                                                | moderate |
| <b>Diette et al<sup>91</sup></b>   | 2007 | USA                                         | case-control    | 600   | 50    | 4.4          | gas                                         | electricity                         | asthma                                                                                                                                                                                           | high     |
| <b>Ding et al<sup>92</sup></b>     | 2009 | China                                       | case-control    | 140   | 69.29 | 6.8          | coal                                        | no exposure to coal                 | asthma                                                                                                                                                                                           | moderate |
| <b>Ding et al<sup>93</sup></b>     | 2012 | China                                       | case-control    | 1737  | NA    | not reported | straw or wood                               | No exposure to straw or wood        | asthma                                                                                                                                                                                           | high     |
| <b>Ding et al<sup>94</sup></b>     | 2015 | China                                       | case-control    | 584   | 48.1  | 63.3         | biomass fuel                                | modern fuel                         | COPD                                                                                                                                                                                             | moderate |
| <b>Dockery et al<sup>95</sup></b>  | 1989 | USA                                         | cross-sectional | 5338  | NA    | 7-11         | gas, kerosene, wood                         | no gas, kerosene, wood              | respiratory symotoms                                                                                                                                                                             | high     |

|                                      |      |                                                     |                            |       |       |              |                                                                                                                              |                                 |                                                               |          |
|--------------------------------------|------|-----------------------------------------------------|----------------------------|-------|-------|--------------|------------------------------------------------------------------------------------------------------------------------------|---------------------------------|---------------------------------------------------------------|----------|
| <b>Dodge et al<sup>96</sup></b>      | 1982 | USA                                                 | cross-sectional            | 419   | NA    | not reported | gas                                                                                                                          | electricity                     | asthma, wheeze and cough                                      | high     |
| <b>Dohoo et al<sup>97</sup></b>      | 2012 | Kenya                                               | cross-sectional            | 62    | 0     | 45.0         | no biogas                                                                                                                    | bio gas                         | breathing problems                                            | high     |
| <b>Dong et al<sup>98</sup></b>       | 2008 | China                                               | cross-sectional            | 3945  | 50.1  | 4.9          | coal                                                                                                                         | no coal                         | asthma                                                        | high     |
| <b>Dong et al<sup>99</sup></b>       | 2008 | China                                               | cross-sectional            | 10784 | 50.4  | 9.9          | coal                                                                                                                         | no exposure to coal             | asthma, respiratory symptoms                                  | high     |
| <b>Dong et al<sup>100</sup></b>      | 2013 | China                                               | cross-sectional            | 30780 | 0     | 23-49        | coal                                                                                                                         | no coal                         | asthma                                                        | high     |
| <b>Dossing et al<sup>101</sup></b>   | 1994 | Saudia Arabia                                       | case-control               | 121   | 46    | 56.9         | open indoor fire                                                                                                             | no open indoor fire             | COPD                                                          | high     |
| <b>Dow et al<sup>102</sup></b>       | 1999 | UK                                                  | cross-sectional            | 4792  | NA    | over 65      | gas appliances                                                                                                               | no exposure to gas appliances   | respiratory symptoms                                          | high     |
| <b>Du et al<sup>103</sup></b>        | 1996 | China                                               | retrospective cohort study | 5546  | 67.8  | 64.3         | coal                                                                                                                         | no coal                         | lung cancer                                                   | moderate |
| <b>Dutt et al<sup>104</sup></b>      | 1996 | India                                               | prospective cohort study   | 295   | 0     | 35.0         | biofuel and kerosene                                                                                                         | gas                             | bronchitis and cough                                          | high     |
| <b>Dutta et al<sup>105</sup></b>     | 2013 | India                                               | cross-sectional            | 480   | 0     | 34.0         | biomass fuel                                                                                                                 | LPG                             | COPD                                                          | moderate |
| <b>Ehrlich et al<sup>106</sup></b>   | 2004 | South Africa                                        | cross-sectional            | 13826 | 41    | over 15      | wood, coal, dung                                                                                                             | electricity, paraffin, gas      | chronic bronchitis                                            | high     |
| <b>Eisner et al<sup>107</sup></b>    | 2002 | USA                                                 | prospective cohort study   | 349   | 28    | 44.2         | gas stove, woodsmoke                                                                                                         | not exposed to gas or woodsmoke | asthma                                                        | high     |
| <b>Eisner et al<sup>108</sup></b>    | 2003 | USA                                                 | cross-sectional            | 445   | 34    | 42.3         | gas stove                                                                                                                    | not exposed to gas stove        | asthma                                                        | high     |
| <b>Ekici et al<sup>109</sup></b>     | 2005 | Turkey                                              | case-control               | 596   | 0     | 51.1         | biomass fuel                                                                                                                 | LPG                             | COPD                                                          | high     |
| <b>Elf et al<sup>110</sup></b>       | 2017 | South Africa                                        | cross-sectional            | 53    | NA    | not reported | kerosene, wood                                                                                                               | electricity                     | tuberculosis                                                  | high     |
| <b>Elf et al<sup>111</sup></b>       | 2019 | India                                               | case-control               | 192   | NA    | not reported | kerosene, wood                                                                                                               | no kerosene, no wood            | tuberculosis                                                  | high     |
| <b>Emenius et al<sup>112</sup></b>   | 2003 | Sweden                                              | case-control               | 540   | 53    | under 2      | NO2 concentration and gas stove                                                                                              | no gas stove                    | respiratory symptoms (recurrent wheeze)                       | high     |
| <b>Emuron et al<sup>113</sup></b>    | 2019 | Peru, Chile, Argentina, Uruguay, Bangladesh, Uganda | cross-sectional            | 12592 | 51.4  | 54.6         | solid fuel                                                                                                                   | clean fuel                      | pulmonary tuberculosis                                        | high     |
| <b>Epstein et al<sup>114</sup></b>   | 2013 | India                                               | cross-sectional            | 36529 | 0     | not reported | kerosene, coal/coal lignite, and biomass fuels (wood, agricultural crop waste, straw/shrubs/grass, dung cakes, and charcoal) | LPG, electricity and biogas     | low birth weight, neonatal death                              | high     |
| <b>Esplugues et al<sup>115</sup></b> | 2011 | Spain                                               | cohort study               | 352   | 54    | under 1      | NO2                                                                                                                          | NA                              | lower respiratory tract infection, wheezing, persistent cough | moderate |
| <b>Esplugues et al<sup>116</sup></b> | 2013 | Spain                                               | prospective cohort study   | 2003  | NA    | under 1      | gas cooker                                                                                                                   | no gas cooker                   | LRTI, wheezing, persistent cough, chestiness                  | high     |
| <b>Etiler et al<sup>117</sup></b>    | 2002 | Turkey                                              | prospective cohort study   | 204   | 50.1  | under 1      | biomass fuel                                                                                                                 | central heating                 | acute respiratory infection                                   | high     |
| <b>Ezeh et al<sup>118</sup></b>      | 2014 | Nigeria                                             | cross-sectional            | 30726 | NA    | under 5      | solid fuel                                                                                                                   | non-solid fuel                  | neonatal mortality, post-neonatal mortality, child mortality  | high     |
| <b>Fagbule et al<sup>119</sup></b>   | 1994 | Nigeria                                             | case-control               | 280   | NA    | 5.5          | biomass smoke                                                                                                                | no biomass smoke                | asthma                                                        | high     |
| <b>Faizan et al<sup>120</sup></b>    | 2019 | India                                               | cross-sectional            | 54985 | 51.47 | not reported | solid fuel                                                                                                                   | clean fuel                      | tb, auri, copd, bronchial asthma                              | high     |

|                                              |      |                                         |                            |       |        |                |                                               |                                                            |                                                                                            |          |
|----------------------------------------------|------|-----------------------------------------|----------------------------|-------|--------|----------------|-----------------------------------------------|------------------------------------------------------------|--------------------------------------------------------------------------------------------|----------|
| <b>Fakunle et al<sup>121</sup></b>           | 2014 | Nigeria                                 | case-control               | 440   | 55.5   | under 5        | firewood                                      | no firewood                                                | acute respiratory infection                                                                | moderate |
| <b>Farrow et al<sup>122</sup></b>            | 1997 | United Kingdom                          | cross-sectional            | 921   | NA     | 3 to 12 months | NO2 concentration                             | NA                                                         | respiratory symptoms (cough, breathlessness, wheeze)                                       | high     |
| <b>Fatmi et al<sup>123</sup></b>             | 2014 | Pakistan                                | case-control               | 146   | 0      | 56.3           | solid fuel                                    | LPG                                                        | acute coronary syndrome                                                                    | low      |
| <b>Fatmi et al<sup>124</sup></b>             | 2019 | Pakistan                                | cross-sectional            | 850   | 0      | not reported   | biomass fuel                                  | no biomass fuel                                            | Hypertension, angina, heart attack, definite or probable CHD on ECG                        | high     |
| <b>Fedortsiv et al<sup>125</sup></b>         | 2012 | Ukraine                                 | cross-sectional            | 4871  | 49.2   | 41791.0        | coal or wood stove                            | central heating                                            | asthma and respiratory symptoms (wheeze, shortness of breath)                              | high     |
| <b>Fei et al<sup>126</sup></b>               | 2007 | China                                   | case-control               | 3486  | 40     | over 35        | coal and firewood/straw; electricity or coal  | electricity or natural gas, no heating                     | COPD                                                                                       | low      |
| <b>Firdaus et al<sup>127</sup></b>           | 2011 | India                                   | retrospective cohort study | 5949  | NA     | not reported   | traditional fuel                              | no exposure to traditional fuel                            | acute respiratory infection, COPD, asthma, lung cancer, cardiovascular disease             | high     |
| <b>Fischer et al<sup>128</sup></b>           | 1998 | UK, Czech Republic, Poland, Netherlands | retrospective cohort study | 16023 | 50.947 | 8.1            | cooking gas, heating gas, other indoor source | no exposure to cooking gas, heating gas                    | wheeze, asthma attack, cough usually                                                       | high     |
| <b>Foote et al<sup>129</sup></b>             | 2013 | Kenya                                   | prospective cohort study   | 168   | 53     | 5 months       | upesi jiko                                    | no upesi jiko                                              | pneumonia                                                                                  | high     |
| <b>Franklin et al<sup>130</sup></b>          | 2012 | Australia                               | case-control               | 71    | 42     | 68.8           | unflued gas heaters                           | other heating                                              | asthma                                                                                     | high     |
| <b>Galeone et al<sup>131</sup></b>           | 2008 | China                                   | case-control               | 654   | NA     | not reported   | solid fuel                                    | gas heating, no coal for cooking                           | Lung cancer                                                                                | low      |
| <b>Gao et al<sup>132</sup></b>               | 1987 | China                                   | case-control               | 1407  | 0      | 36 - 69        | coal, gas, wood                               | no exposure to coal, gas, wood                             | lung cancer                                                                                | low      |
| <b>Garcia-Sancho et al<sup>133</sup></b>     | 2009 | Mexico                                  | case-control               | 126   | 0      | 40.9           | biomass fuel                                  | less than 20 years of exposure to smoke from biomass fuels | tuberculosis                                                                               | low      |
| <b>Garrett et al<sup>134</sup></b>           | 1998 | Australia                               | case-control               | 148   | NA     | 10.2           | gas stove and NO2 concentration               | no gas stove                                               | respiratory symptoms (cough, shortness of breath, wheeze, chest tightness, asthma attacks) | high     |
| <b>Gaviola et al<sup>135</sup></b>           | 2016 | Peru                                    | cross-sectional            | 2953  | 49     | 55.0           | biomass fuel                                  | no regular exposure to biomass                             | asthma                                                                                     | high     |
| <b>Ghimire et al<sup>136</sup></b>           | 2019 | Nepal                                   | cross-sectional            | 23335 | 0      | not reported   | biomass energy                                | natural gas                                                | perinatal mortality and extended perinatal mortality                                       | high     |
| <b>Ghosh et al<sup>137</sup></b>             | 2006 | India                                   | cross-sectional            | 32470 | 52.2   | not reported   | biomass fuel                                  | cleaner fuel                                               | low birth weight                                                                           | high     |
| <b>Gillespie-Bennett et al<sup>138</sup></b> | 2011 | New Zealand                             | cross-sectional            | 409   | 59     | 9.6            | unflued gas heating and NO2 concentration     | no NO2 exposure                                            | asthma                                                                                     | high     |
| <b>Gninafon et al<sup>139</sup></b>          | 2011 | Benin                                   | case-control               | 600   | 65.8   | 34.8           | solid fuel                                    | non-solid fuel                                             | tuberculosis                                                                               | moderate |
| <b>Golshan et al<sup>140</sup></b>           | 2002 | Iran                                    | cross-sectional            | 561   | 0      | 27.6           | kerosene, wood, LPG                           | no kerosene, wood, LPG                                     | asthma and chronic bronchitis                                                              | high     |
| <b>Gonzalez-Garcia et al<sup>141</sup></b>   | 2015 | Colombia                                | cross-sectional            | 5539  | 33.2   | over 40        | wood smoke                                    | no exposure to wood smoke                                  | asthma, wheeze                                                                             | high     |
| <b>Guggisberg et al<sup>142</sup></b>        | 2003 | Canada                                  | cross-sectional            | 402   | 47     | 25.5           | woodsmoke                                     | no exposure to woodsmoke                                   | respiratory symptoms (wheeze, chest tightness,                                             | high     |

|                                              |      |                                                                                              |                             |       |       |              |                                                  |                                |                                                                                                                                                         |          |
|----------------------------------------------|------|----------------------------------------------------------------------------------------------|-----------------------------|-------|-------|--------------|--------------------------------------------------|--------------------------------|---------------------------------------------------------------------------------------------------------------------------------------------------------|----------|
|                                              |      |                                                                                              |                             |       |       |              |                                                  |                                | cough, phlegm, dyspnoea on exertion)                                                                                                                    |          |
| <b>Gupta et al<sup>143</sup></b>             | 1997 | India                                                                                        | cross-sectional             | 707   | 69.9  | not reported | wood or cow dung                                 | gas, kerosene or coal          | tuberculosis, COPD, acute respiratory infection                                                                                                         | moderate |
| <b>Gupta et al<sup>144</sup></b>             | 2001 | India                                                                                        | case-control                | 890   | 86    | not reported | coal, wood                                       | not exposed to coal or wood    | lung cancer                                                                                                                                             | low      |
| <b>Gurley et al<sup>145</sup></b>            | 2013 | Bangladesh                                                                                   | prospective cohort study    | 257   | 53    | 1.9          | biomass fuel                                     | clean fuel                     | acute respiratory infection                                                                                                                             | high     |
| <b>Hansel et al<sup>146</sup></b>            | 2008 | USA                                                                                          | prospective cohort study    | 150   | 58    | 4.4          | NO2 exposure                                     | no exposure to NO2             | asthma symptoms                                                                                                                                         | high     |
| <b>Hansel et al<sup>147</sup></b>            | 2013 | USA                                                                                          | prospective cohort study    | 84    | 58    | 68.9         | indoor particles                                 | indoor particles               | exacerbations                                                                                                                                           | high     |
| <b>Haque et al<sup>148</sup></b>             | 2016 | Bangladesh                                                                                   | case-control                | 552   | 40.95 | 38.8         | fuel of plant origin and cow dung                | clear fuel                     | tuberculosis                                                                                                                                            | high     |
| <b>Harerimana et al<sup>149</sup></b>        | 2016 | Rwanda                                                                                       | cross-sectional             | 8599  | 50.7  | under 5      | improved cooking fuel                            | unimproved cooking fuel        | acute lower respiratory infection                                                                                                                       | high     |
| <b>Hasan et al<sup>150</sup></b>             | 2017 | Bangladesh, Nepal, Pakistan                                                                  | cross-sectional             | 23940 | NA    | under 5      | not ideal cooking fuel                           | ideal cooking fuel             | acute respiratory infection                                                                                                                             | high     |
| <b>Hasan et al<sup>151</sup></b>             | 2019 | India                                                                                        | cross-sectional             | 10575 | 0     | 15-49        | biomass fuel                                     | no biomass fuel                | symptoms                                                                                                                                                | high     |
| <b>Hazra et al<sup>152</sup></b>             | 2007 | India                                                                                        | cross-sectional             | NA    | 0     | not reported | traditional fuel                                 | modern fuel                    | asthma and tuberculosis                                                                                                                                 | high     |
| <b>Helsing et al<sup>153</sup></b>           | 1982 | USA                                                                                          | retrospective cohort study  | 708   | 80.8  | not reported | gas                                              | electricity                    | respiratory symptoms                                                                                                                                    | high     |
| <b>Hernandez-Garduno et al<sup>154</sup></b> | 2004 | Mexico                                                                                       | case-control                | 386   | 0     | 44-87        | woodsmoke                                        | not exposed to woodsmoke       | lung cancer                                                                                                                                             | moderate |
| <b>Hersoug et al<sup>155</sup></b>           | 2010 | Denmark                                                                                      | cross-sectional             | 3471  | 44.7  | 18 to 69     | wood                                             | no exposure to wood            | wheeze, cough                                                                                                                                           | high     |
| <b>Hessel et al<sup>156</sup></b>            | 2001 | Canada                                                                                       | case-control                | 284   | 60.6  | 5-19         | gas                                              | no gas                         | asthma                                                                                                                                                  | high     |
| <b>Hoek et al<sup>157</sup></b>              | 1984 | Netherlands                                                                                  | case-control                | 231   | NA    | 6.0          | NO2 concentration                                | NA                             | respiratory symptoms                                                                                                                                    | high     |
| <b>Holscher et al<sup>158</sup></b>          | 2000 | Germany                                                                                      | cross-sectional             | 2198  | 50    | 5 to 14      | gas                                              | no exposure to gas             | asthma, bronchitis, rhinitis, wheezing, shortness of breath, cough, cough without cold, cough during day/night, %¥3 febrile infections, acute infection | high     |
| <b>Honicky et al<sup>159</sup></b>           | 1985 | USA                                                                                          | case-control                | 62    | 60    | 3.5          | wood                                             | no wood burning stove          | wheeze and cough                                                                                                                                        | high     |
| <b>Hosein et al<sup>160</sup></b>            | 1989 | USA                                                                                          | cross-sectional             | 1357  | 53.7  | 7-70         | gas                                              | electricity                    | symptoms                                                                                                                                                | high     |
| <b>Hosgood et al<sup>161</sup></b>           | 2008 | China                                                                                        | retrospective cohort study  | 8418  | 52.1  | 56.3         | portable stove                                   | unvented stove                 | lung cancer death                                                                                                                                       | moderate |
| <b>Hosgood et al<sup>162</sup></b>           | 2010 | USA, Canada, Singapore, China, Hungary, Poland, Czech Republic, Slovakia, Romania and Russia | case-control                | 11641 | 58.2  | not reported | solid fuel                                       | non-solid fuel                 | lung cancer                                                                                                                                             | low      |
| <b>Howden-Chapman et al<sup>163</sup></b>    | 2008 | New Zealand                                                                                  | randomised-controlled trial | 349   | 57.3  | 10.0         | non-polluting, more effective replacement heater | less effective form of heating | respiratory symptoms (wheeze, dry cough at night)                                                                                                       | high     |
| <b>Huang et al<sup>164</sup></b>             | 1992 | China                                                                                        | case-control                | 270   | NA    | not reported | coal                                             | no coal                        | lung cancer                                                                                                                                             | moderate |

|                                           |      |                                                                                                            |                          |        |        |              |                                               |                                                                                      |                                                                                                                                                              |          |
|-------------------------------------------|------|------------------------------------------------------------------------------------------------------------|--------------------------|--------|--------|--------------|-----------------------------------------------|--------------------------------------------------------------------------------------|--------------------------------------------------------------------------------------------------------------------------------------------------------------|----------|
| <b>Hystad et al<sup>165</sup></b>         | 2019 | Bangladesh, Brazil, Chile, China, Colombia, India, Pakistan, Philippines, South Africa, Tanzania, Zimbabwe | prospective cohort study | 91350  | 41.2   | 50.2         | solid fuel                                    | clean fuel                                                                           | all-cause mortality, cardiovascular mortality, respiratory mortality, myocardial infarction, stroke, heart failure, tb, copd, pneumonia, lung cancer, asthma | high     |
| <b>Indahsari et al<sup>166</sup></b>      | 2018 | Indonesia                                                                                                  | cross-sectional          | 156    | NA     | under 5      | charcoal, wood, kerosene                      | no biomass                                                                           | acute respiratory infection                                                                                                                                  | high     |
| <b>Infante-Rivard et al<sup>167</sup></b> | 1993 | Canada                                                                                                     | case-control             | 914    | 54.9   | 3-4          | gas, kerosene, fire place, wood stove         | no gas cooking appliance or no kerosene space heater, no fire place or no wood stove | asthma                                                                                                                                                       | moderate |
| <b>Ingale et al<sup>168</sup></b>         | 2013 | India                                                                                                      | cross-sectional          | 750    | 50     | 46.0         | LPG, agrowaste, wood                          | no LPG, agrowaste, wood                                                              | respiratory symptoms (difficulty in respiration, frequent coughing, throat irritation, chest pain)                                                           | high     |
| <b>Islam et al<sup>169</sup></b>          | 2013 | India                                                                                                      | cross-sectional          | 370    | 68     | under 5      | wood, kerosene, cow dung                      | gas                                                                                  | acute respiratory infection                                                                                                                                  | high     |
| <b>Jafta et al<sup>170</sup></b>          | 2019 | South Africa                                                                                               | case-control             | 227    | 46.3   | under 15     | dirty                                         | clean                                                                                | tuberculosis                                                                                                                                                 | low      |
| <b>Jaganath et al<sup>171</sup></b>       | 2015 | Peru                                                                                                       | cross-sectional          | 2957   | 49.3   | over 35      | Biomass fuel                                  | no exposure to biomass fuel                                                          | COPD                                                                                                                                                         | moderate |
| <b>Jamali et al<sup>172</sup></b>         | 2017 | Pakistan                                                                                                   | cohort study             | 605    | 0      | 32.4         | improved stoves                               | traditional stoves                                                                   | asthma and respiratory symptoms                                                                                                                              | high     |
| <b>Janjua et al<sup>173</sup></b>         | 2012 | Pakistan                                                                                                   | cross-sectional          | 566    | 50.2   | under 5      | biomass fuel                                  | fossil fuel                                                                          | acute respiratory infection                                                                                                                                  | high     |
| <b>Jarvis et al<sup>174</sup></b>         | 1996 | United Kingdom                                                                                             | cross-sectional          | 1159   | 43.1   | 22 to 44     | gas                                           | no exposure to gas                                                                   | respiratory symptoms                                                                                                                                         | high     |
| <b>Jarvis et al<sup>175</sup></b>         | 1998 | 14 European countries                                                                                      | prospective cohort study | 11590  | 48     | not reported | gas cooker                                    | no gas cooker                                                                        | wheeze                                                                                                                                                       | high     |
| <b>Jedrychowski et al<sup>176</sup></b>   | 1990 | Poland                                                                                                     | case-control             | 560    | 0      | over 65      | gas cooker                                    | no gas cooker                                                                        | respiratory symptoms                                                                                                                                         | high     |
| <b>Jedrychowski et al<sup>177</sup></b>   | 1995 | Poland                                                                                                     | cross-sectional          | 1441   | 0      | 72.1         | gas                                           | no gas                                                                               | asthma                                                                                                                                                       | high     |
| <b>Jiang et al<sup>178</sup></b>          | 2015 | China                                                                                                      | prospective cohort study | 9895   | 0      | not reported | coal, biomass, electromagnet                  | gas                                                                                  | low birth weight                                                                                                                                             | low      |
| <b>Jie et al<sup>179</sup></b>            | 2016 | China                                                                                                      | prospective cohort study | 610    | 45.6   | 44.9         | coal                                          | clean fuel                                                                           | asthma                                                                                                                                                       | high     |
| <b>Jindal et al<sup>180</sup></b>         | 2006 | India                                                                                                      | cross-sectional          | 35295  | 51.6   | over 35      | liquid petroleum gas, kerosene, or solid fuel | no self cooking                                                                      | COPD                                                                                                                                                         | high     |
| <b>Jindal et al<sup>181</sup></b>         | 2012 | India                                                                                                      | cross-sectional          | 169577 | 50.188 | over 15      | electricity/LPG, coal/wood, other fuels       | not regular exposure to cooking fuel                                                 | asthma, chronic bronchitis                                                                                                                                   | high     |

|                                          |      |              |                            |       |       |             |                                                                                                                                                                                                                                       |                                                                                                       |                                                                                                                               |      |
|------------------------------------------|------|--------------|----------------------------|-------|-------|-------------|---------------------------------------------------------------------------------------------------------------------------------------------------------------------------------------------------------------------------------------|-------------------------------------------------------------------------------------------------------|-------------------------------------------------------------------------------------------------------------------------------|------|
| <b>Johnson et al<sup>182</sup></b>       | 2008 | Nigeria      | prospective cohort study   | 323   | 54.8  | 15.7        | wood smoke                                                                                                                                                                                                                            | no exposure to wood smoke                                                                             | ALRI                                                                                                                          | high |
| <b>Johnson et al<sup>183</sup></b>       | 2011 | India        | cross-sectional            | 900   | 0     | 30 to 70    | biomass fuel                                                                                                                                                                                                                          | clean fuel                                                                                            | COPD                                                                                                                          | high |
| <b>Jubulis et al<sup>184</sup></b>       | 2014 | India        | case-control               | 178   | 57    | 3.0         | biomass fuel                                                                                                                                                                                                                          | not exposed to biomass fuel                                                                           | tuberculosis                                                                                                                  | low  |
| <b>Juntarawijit et al<sup>185</sup></b>  | 2019 | Thailand     | cross-sectional            | 1134  | 16.3  | 53.4        | wood, charcoal                                                                                                                                                                                                                        | lpg                                                                                                   | symptoms                                                                                                                      | high |
| <b>Kadam et al<sup>186</sup></b>         | 2013 | India        | retrospective cohort study | 328   | 0     | 19-35       | wood, kerosene                                                                                                                                                                                                                        | LPG                                                                                                   | low birth weight                                                                                                              | high |
| <b>Kafando et al<sup>187</sup></b>       | 2018 | Burkina Faso | cross-sectional            | 922   | NA    | under 5     | wood, charcoal                                                                                                                                                                                                                        | gas                                                                                                   | acute respiratory infection                                                                                                   | high |
| <b>Kaji et al<sup>188</sup></b>          | 2014 | USA          | case-control               | 77    | 61    | 69.4        | PM2.5 concentration                                                                                                                                                                                                                   | na                                                                                                    | respiratory symptoms                                                                                                          | high |
| <b>Kan et al<sup>189</sup></b>           | 2011 | China        | case-control               | 606   | 72.1  | 55.5        | Solid fuel (coal and biomass) included coal/lignite, charcoal, wood, straw/ shrubs/grass, animal dung, and agricultural crop residue; non-solid fuel included electricity, liquefied petroleum gas, natural gas, biogas, and kerosene | No solid fuel                                                                                         | tuberculosis                                                                                                                  | high |
| <b>Kashima et al<sup>190</sup></b>       | 2010 | Indonesia    | cross-sectional            | 15242 | 51.6  | 1.9         | coal/lignite, charcoal, firewood/straw, and dung                                                                                                                                                                                      | electricity, liquid petroleum gas electricity, liquid petroleum gas/natural gas, biogas, and kerosene | acute upper respiratory infection, acute lower respiratory infection, neonatal mortality, infant mortality, stillbirth        | high |
| <b>Kasznia-Kocot et al<sup>191</sup></b> | 2010 | Poland       | cross-sectional            | 1130  | 44.8  | 13 to 15    | coal                                                                                                                                                                                                                                  | no exposure to coal                                                                                   | asthma                                                                                                                        | high |
| <b>Khalequzzaman et al<sup>192</sup></b> | 2007 | Bangladesh   | cross-sectional            | 95    | NA    | under 5     | biomass                                                                                                                                                                                                                               | fossil fuel                                                                                           | nasal discharge, cough, shortness of breath, chest tightness, wheeze, respiratory diseases (bronchiolitis, asthma, pneumonia) | high |
| <b>Khan et al<sup>193</sup></b>          | 2017 | Bangladesh   | cross-sectional            | 22789 | 0     | 25.6        | solid fuel                                                                                                                                                                                                                            | Clean fuel                                                                                            | Acute respiratory infection, low birth weight, stillbirth, all-cause mortality under 5 years, neonatal mortality              | high |
| <b>Khan et al<sup>194</sup></b>          | 2018 | Pakistan     | cross-sectional            | 11040 | 50.95 | 0-59 months | solid fuels and kerosene, where solid fuels include wood, animal dung, charcoal, coal, and shrubs/ grass/straw                                                                                                                        | natural gas, LPG, biogas, and electricity                                                             | acute respiratory infection                                                                                                   | high |
| <b>Kilabuko et al<sup>195</sup></b>      | 2007 | Tanzania     | case-control               | 5524  | 49.7  | under 5     | Biomass fuel                                                                                                                                                                                                                          | kerosene/charcoal                                                                                     | acute respiratory infection                                                                                                   | high |
| <b>Kilpelainen et al<sup>196</sup></b>   | 2001 | Finland      | cross-sectional            | 10667 | 39    | 18-25       | Wood stove heating at age 0-6 years                                                                                                                                                                                                   | Other heating system at age 0-6 years                                                                 | asthma and wheeze                                                                                                             | high |
| <b>Kim et al<sup>197</sup></b>           | 2014 | China        | case-control               | 520   | 100   | 18-85       | Ever smoky coal use                                                                                                                                                                                                                   | Never smoky coal use                                                                                  | lung cancer                                                                                                                   | high |
| <b>Kim et al<sup>198</sup></b>           | 2015 | China        | prospective cohort study   | 71320 | 0     | 51.4        | coal, coke balls                                                                                                                                                                                                                      | gas                                                                                                   | lung cancer                                                                                                                   | high |
| <b>Kim et al<sup>199</sup></b>           | 2016 | China        | prospective cohort study   | 74941 | 0     | 52.0        | coal                                                                                                                                                                                                                                  | no coal                                                                                               | all cause mortality, lung cancer mortality, cardiovascular mortality                                                          | low  |

|                                            |      |              |                            |         |       |                    |                                                                |                                      |                                                  |          |
|--------------------------------------------|------|--------------|----------------------------|---------|-------|--------------------|----------------------------------------------------------------|--------------------------------------|--------------------------------------------------|----------|
| <b>Kiraz et al<sup>200</sup></b>           | 2003 | Turkey       | cross-sectional            | 344     | 0     | 41.4               | biomass fuel                                                   | no biomass fuel                      | Chronic bronchitis                               | moderate |
| <b>Kleimola et al<sup>201</sup></b>        | 2015 | 47 countries | cross-sectional            | 1526209 | NA    | under 5            | solid fuel                                                     | clean fuel                           | neonatal and child mortality                     | high     |
| <b>Kleinerman et al<sup>202</sup></b>      | 2002 | China        | case-control               | 2651    | 74    | 35-70              | coal                                                           | biomass                              | lung cancer                                      | low      |
| <b>Ko et al<sup>203</sup></b>              | 1997 | Taiwan       | case-control               | 210     | 0     | 60.7               | coal or anthracite, wood or charcoal                           | no cooking or gas                    | lung cancer                                      | moderate |
| <b>Kolappan et al<sup>204</sup></b>        | 2009 | India        | case-control               | 1530    | 86.67 | over 15            | biomass                                                        | non-biomass                          | tuberculosis                                     | moderate |
| <b>Koo et al<sup>205</sup></b>             | 1983 | China        | case-control               | 400     | 0     | 61.2               | kerosene, LPG                                                  | no kerosene, LPG                     | lung cancer                                      | moderate |
| <b>Kraai et al<sup>206</sup></b>           | 2013 | Venezuela    | cross-sectional            | 630     | 50    | 6.0                | wood                                                           | gas                                  | wheeze                                           | high     |
| <b>Kristensen et al<sup>207</sup></b>      | 2006 | South Africa | prospective cohort study   | 571     | 50    | not reported       | paraffin or coal                                               | electricity or gas                   | acute respiratory infection                      | moderate |
| <b>Kuai et al<sup>208</sup></b>            | 2018 | China        | prospective cohort study   | 271217  | 41    | 51.0               | solid fuel                                                     | clean fuel                           | cardiovascular mortality and all-cause mortality | low      |
| <b>Kuhr et al<sup>209</sup></b>            | 1991 | Germany      | cross-sectional            | 704     | NA    | 7-16               | LPG, wood, oil or coal                                         | central, remote or floor heating     | asthma                                           | high     |
| <b>Kumar et al<sup>210</sup></b>           | 2004 | India        | case-control               | 100     | 70    | 2 months - 5 years | fuel other than LPG                                            | LPG                                  | ALRI                                             | low      |
| <b>Kumar et al<sup>211</sup></b>           | 2008 | India        | cross-sectional            | 912     | 59.2  | 7-15               | biomass fuel                                                   | LPG                                  | asthma                                           | high     |
| <b>Kurmi et al<sup>212</sup></b>           | 2014 | Nepal        | cross-sectional            | 1648    | 46.2  | 35.3               | biomass                                                        | non-biomass                          | respiratory symptoms                             | high     |
| <b>Kurt et al<sup>213</sup></b>            | 2007 | Turkey       | cross-sectional            | 25843   | 50.1  | 9.5                | natural gas                                                    | wood, coal, biomass                  | asthma, wheeze                                   | high     |
| <b>Kurt et al<sup>214</sup></b>            | 2009 | Turkey       | cross-sectional            | 25843   | NA    | not reported       | wood, biomass, coal                                            | LPG, natural gas                     | asthma, wheeze                                   | high     |
| <b>Kurti et al<sup>215</sup></b>           | 2016 | Belize       | cross-sectional            | 67      | 28.4  | 44.2               | household air pollution                                        | household air pollution              | wheeze                                           | high     |
| <b>Kwas et al<sup>216</sup></b>            | 2017 | Tunisia      | cross-sectional            | 140     | 0     | 48.0               | biomass                                                        | no biomass                           | COPD                                             | high     |
| <b>Lakshmi et al<sup>217</sup></b>         | 2012 | India        | case-control               | 378     | 0     | over 20            | biomass, kerosene                                              | LPG                                  | tuberculosis                                     | moderate |
| <b>Lakshmi et al<sup>218</sup></b>         | 2013 | India        | cross-sectional            | 188917  | NA    | 15-49              | wood, kerosene, animal dung, crop residues, coke/coal/charcoal | LPG/ Electricity                     | stillbirth                                       | moderate |
| <b>Lamichhane et al<sup>219</sup></b>      | 2017 | India        | cross-sectional            | 16157   | NA    | not reported       | polluting fuel                                                 | Cleaner fuel                         | acute respiratory infection                      | high     |
| <b>Lamichhane et al<sup>219</sup></b>      | 2017 | India        | cross-sectional            | 16157   | 52    | 2.1                | polluting fuel                                                 | cleaner fuel                         | Acute respiratory infection                      | high     |
| <b>Lan et al<sup>220</sup></b>             | 1993 | China        | case-control               | 278     | 0     | not reported       | smoky coal                                                     | no smoky coal                        | lung cancer                                      | moderate |
| <b>Lan et al<sup>221</sup></b>             | 2002 | China        | retrospective cohort study | 21232   | 52.5  | 39.0               | Improved stoves                                                | Firepits and stoves without chimneys | Lung cancer                                      | low      |
| <b>Lan et al<sup>222</sup></b>             | 2008 | China        | case-control               | 996     | 52.2  | 53.0               | smoky coal                                                     | smokeless coal or wood               | lung cancer                                      | low      |
| <b>Laniado-Laborin et al<sup>223</sup></b> | 2011 | Mexico       | cross-sectional            | 2293    | 39.8  | 57.6               | biomass fuel                                                   | not exposed to biomass               | COPD                                             | low      |
| <b>Lanphear et al<sup>224</sup></b>        | 2001 | USA          | cross-sectional            | 8257    | 49    | under 6            | gas stove                                                      | no gas stove                         | asthma                                           | high     |
| <b>Lee et al<sup>225</sup></b>             | 2001 | Taiwan       | case-control               | 527     | 44.78 | 61.4               | coal/anthracite, wood/charcoal                                 | no cooking or gas                    | lung cancer                                      | low      |
| <b>Lee et al<sup>226</sup></b>             | 2012 | China        | cross-sectional            | 14068   | 45.9  | 48.6               | solid fuels                                                    | no exposure to solid fuels           | Hypertension, CHD, stroke, diabetes              | high     |



|                                          |      |                          |                          |        |      |              |                                            |                                               |                                                                                                             |          |
|------------------------------------------|------|--------------------------|--------------------------|--------|------|--------------|--------------------------------------------|-----------------------------------------------|-------------------------------------------------------------------------------------------------------------|----------|
| <b>Levesqu et al<sup>227</sup></b>       | 2001 | Canada                   | cross-sectional          | 178    | 30.9 | 37.0         | wood                                       | electricity                                   | upper and lower respiratory illness                                                                         | high     |
| <b>Lewis et al<sup>228</sup></b>         | 2017 | India                    | cross-sectional          | 105    | NA   | not reported | improved cookstove                         | traditional cookstove only                    | cold and cough in past month                                                                                | high     |
| <b>Li et al<sup>229</sup></b>            | 2019 | China                    | cross-sectional          | 1207   | 48.7 | not reported | use of a coal stove for cooking or warming | no use of a coal stove for cooking or warming | asthma                                                                                                      | high     |
| <b>Li et al<sup>230</sup></b>            | 2015 | China                    | case-control             | 531    | NA   | 51.9         | smoky coal                                 | wood or smokeless coal                        | lung cancer                                                                                                 | moderate |
| <b>Li et al<sup>231</sup></b>            | 2019 | China                    | prospective cohort study | 475827 | 40.6 | 45.5         | solid fuel                                 | cleaner fuel, no solid fuel                   | COPD                                                                                                        | low      |
| <b>Lin et al<sup>232</sup></b>           | 2013 | Netherlands              | prospective cohort study | 3590   | 52   | not reported | LPG                                        | no LPG                                        | asthma and wheeze                                                                                           | high     |
| <b>Lin et al<sup>233</sup></b>           | 2012 | China                    | cross-sectional          | 7259   | 43.2 | not reported | smoky coal, coke, smokeless coal           | wood                                          | lung cancer                                                                                                 | high     |
| <b>Lissowska et al<sup>234</sup></b>     | 2005 | Seven European countries | case-control             | 5979   | 75.4 | not reported | solid fuel                                 | nonsolid fuel                                 | lung cancer                                                                                                 | low      |
| <b>Liu et al<sup>235</sup></b>           | 1993 | China                    | case-control             | 316    | 70.9 | 61.0         | LPG, wood                                  | coal                                          | lung cancer                                                                                                 | low      |
| <b>Liu et al<sup>236</sup></b>           | 2007 | China                    | cross-sectional          | 3286   | 41.7 | over 40      | coal, biomass                              | LPG                                           | COPD                                                                                                        | high     |
| <b>Liu et al<sup>237</sup></b>           | 2014 | China                    | cross-sectional          | 23326  | 50.3 | 43986.0      | coal                                       | no coal                                       | asthma and asthma related symptoms                                                                          | high     |
| <b>Liu et al<sup>238</sup></b>           | 2014 | China                    | cross-sectional          | 13335  | 50.8 | 9.5          | coal, wood or natural gas                  | electric cooking                              | respiratory symptoms                                                                                        | high     |
| <b>Liu et al<sup>239</sup></b>           | 2018 | China                    | prospective cohort study | 5384   | NA   | above 45     | solid fuel                                 | no solid fuel                                 | chronic lung disease, heart disease and stroke                                                              | high     |
| <b>Liu et al<sup>240</sup></b>           | 2018 | China                    | cross-sectional          | 13335  | 50.8 | above 45     | natural gas                                | electricity                                   | preterm birth (PTB), low birth weight (LBW), term low birth weight (T-LBW), small for gestational age (SGA) | high     |
| <b>Liu et al<sup>239</sup></b>           | 2018 | China                    | prospective cohort study | 5384   | NA   | 4.8          | solid fuel                                 | no solid fuel                                 | chronic lung disease, heart disease and stroke                                                              | high     |
| <b>Loeb et al<sup>241</sup></b>          | 2009 | Canada                   | case-control             | 1584   | 44.6 | 76.5         | gas stove                                  | no gas stove                                  | pneumonia                                                                                                   | high     |
| <b>Luo et al<sup>242</sup></b>           | 1996 | China                    | case-control             | 408    | 76.5 | over 60      | Coal                                       | No coal use                                   | Lung cancer                                                                                                 | low      |
| <b>Mahalanabis et al<sup>243</sup></b>   | 2002 | India                    | case-control             | 262    | 56.5 | under 1      | Solid fuel                                 | No solid fuel                                 | pneumonia                                                                                                   | moderate |
| <b>Maier et al<sup>244</sup></b>         | 1997 | USA                      | cross-sectional          | 925    | 49.9 | not reported | solid fuel                                 | No solid fuel use                             | asthma and wheezing                                                                                         | moderate |
| <b>Malinauskiene et al<sup>245</sup></b> | 2011 | Lithuania                | case-control             | 1093   | 0    | 35-61        | gas stove                                  | electric stove                                | first myocardial infarction                                                                                 | moderate |
| <b>Manyeh et al<sup>246</sup></b>        | 2016 | Ghana                    | cross-sectional          | 6777   | 52.2 | not reported | wood, charcoal, other                      | gas                                           | low birth weight                                                                                            | high     |
| <b>Mavalankar et al<sup>247</sup></b>    | 1991 | India                    | case-control             | 2076   | 0    | not reported | cooking smoke                              | no exposure to cooking smoke                  | stillbirth                                                                                                  | low      |
| <b>Mavalankar et al<sup>248</sup></b>    | 1992 | India                    | case-control             | 2782   | 0    | not reported | cooking smoke                              | no exposure to cooking smoke                  | low birth weight                                                                                            | high     |
| <b>McConnell et al<sup>249</sup></b>     | 2002 | USA                      | cohort study             | 3535   | 47.4 | 42614        | Gas, wood                                  | no gas or wood                                | asthma                                                                                                      | high     |
| <b>McCormack et al<sup>250</sup></b>     | 2009 | USA                      | cohort study             | 150    | 58   | 4.4          | PM2.5 concentration                        | NA                                            | asthma symptoms                                                                                             | high     |
| <b>Mejias et al<sup>251</sup></b>        | 2018 | Dominican Republic       | cross-sectional          | 624    | 50   | 3-11         | gas                                        | electricity                                   | asthma                                                                                                      | high     |

|                                      |      |                          |                             |        |      |              |                                                                                                                                                            |                                                                                              |                                                                                                                                             |          |
|--------------------------------------|------|--------------------------|-----------------------------|--------|------|--------------|------------------------------------------------------------------------------------------------------------------------------------------------------------|----------------------------------------------------------------------------------------------|---------------------------------------------------------------------------------------------------------------------------------------------|----------|
| <b>Melia et al<sup>252</sup></b>     | 1977 | UK                       | prospective cohort study    | 5758   | 50.7 | 6-11         | gas                                                                                                                                                        | electricity                                                                                  | respiratory symptoms                                                                                                                        | high     |
| <b>Melia et al<sup>253</sup></b>     | 1979 | United Kingdom           | cohort study                | 2408   | 49.3 | 44141.0      | gas cooking                                                                                                                                                | electric cooking                                                                             | respiratory symptoms                                                                                                                        | high     |
| <b>Melsom et al<sup>254</sup></b>    | 2001 | Nepal                    | case-control                | 247    | 63   | 14.1         | open fire or burning stove without a flue, wood and grass                                                                                                  | gas, kerosene stove, fuel such as wood and grass                                             | asthma                                                                                                                                      | high     |
| <b>Menezes et al<sup>255</sup></b>   | 1994 | Brazil                   | cross-sectional             | 1053   | 40.8 | not reported | Indoor pollution                                                                                                                                           | No source of smoke                                                                           | chronic bronchitis                                                                                                                          | high     |
| <b>Milanzi et al<sup>256</sup></b>   | 2017 | Malawi                   | cross-sectional             | 9124   | 0    | not reported | High pollution fuel                                                                                                                                        | Low pollution fuel                                                                           | birth weight and size at birth                                                                                                              | high     |
| <b>Mir et al<sup>257</sup></b>       | 2012 | India                    | cross-sectional             | 1644   | 53.9 | not reported | Cooking fuel other than LPG                                                                                                                                | LPG                                                                                          | acute respiratory infection                                                                                                                 | high     |
| <b>Mishra et al<sup>258</sup></b>    | 1999 | India                    | cross-sectional             | 260162 | 51.4 | over 20      | biomass fuel (wood or dung)                                                                                                                                | cleaner fuel (charcoal, coal/coke/lignite, kerosene, electricity, petroleum gas, or biogas). | tuberculosis                                                                                                                                | high     |
| <b>Mishra et al<sup>259</sup></b>    | 2003 | India                    | cross-sectional             | 38595  | 52.9 | over 60      | wood, crop residues, dung cakes or a mix of biomass fuels and cleaner fuels or coal/coke/lignite/charcoal group                                            | kerosene, petroleum gas, biogas, or electricity                                              | asthma                                                                                                                                      | high     |
| <b>Mishra et al<sup>260</sup></b>    | 2003 | Zimbabwe                 | cross-sectional             | 3559   | 48.7 | under 5      | high and medium pollution fuel                                                                                                                             | LPG/natural gas or electricity                                                               | acute respiratory infection                                                                                                                 | high     |
| <b>Mishra et al<sup>261</sup></b>    | 2004 | Zimbabwe                 | cross-sectional             | 3559   | NA   | not reported | wood, dung, or straw                                                                                                                                       | Liquid petroleum gas/natural gas or electricity                                              | birth weight                                                                                                                                | high     |
| <b>Mishra et al<sup>262</sup></b>    | 2005 | India                    | cross-sectional             | 19189  | NA   | not reported | wood, dung, crop residues, mix of biomass (the former) and any of (electricity, liquid petroleum gas, biogas, or kerosene), or coal,coke,lignite, charcoal | electricity, liquid petroleum gas, biogas, or kerosene                                       | stillbirth                                                                                                                                  | high     |
| <b>Mishra et al<sup>263</sup></b>    | 2005 | India                    | cross-sectional             | 29768  | 51.8 | 40-49        | Cooking fuel (high/medium pollution)                                                                                                                       | Cooking fuel (low pollution)                                                                 | acute respiratory infection                                                                                                                 | high     |
| <b>Misra et al<sup>264</sup></b>     | 2018 | South Africa             | cross-sectional             | 415    | 0    | 24.0         | wood                                                                                                                                                       | electricity                                                                                  | respiratory symptoms and illnesses                                                                                                          | high     |
| <b>Mitter et al<sup>265</sup></b>    | 2016 | Iran                     | prospective cohort study    | 50045  | 42   | 52.1         | LPG, kerosene/diesel, wood, dung                                                                                                                           | no LPG, kerosene/diesel, wood, dung                                                          | all-cause death, cardiovascular death, ischaemic heart disease mortality , respiratory disease death and cerebrovascular accident mortality | low      |
| <b>Mommers et al<sup>266</sup></b>   | 2005 | Germany, The Netherlands | case-control                | 1191   | NA   | 7-8          | gas cooking daily, heating with coal, wood, gas or oil                                                                                                     | gas cooking not daily, central heating or heating with electricity                           | asthmatic symptoms, coughing                                                                                                                | high     |
| <b>Moran et al<sup>267</sup></b>     | 1999 | UK                       | cohort study                | 1449   | NA   | 34-35        | gas                                                                                                                                                        | electricity                                                                                  | asthma/wheeze, respiratory symptoms                                                                                                         | high     |
| <b>Morris et al<sup>268</sup></b>    | 1990 | USA                      | case-control                | 116    | NA   | under 2      | Wood burning stove                                                                                                                                         | No wood burning stove                                                                        | lower respiratory tract infection (bronchiolitis or pneumonia)                                                                              | high     |
| <b>Mortimer et al<sup>269</sup></b>  | 2017 | Malawi                   | randomised-controlled trial | 10750  | 48.4 | under 5      | cleaner burning biomass-fuelled cookstoves                                                                                                                 | traditional cooking methods                                                                  | pneumonia, under-five mortality                                                                                                             | low      |
| <b>Mu et al<sup>270</sup></b>        | 2013 | China                    | case-control                | 865    | 50.4 | not reported | solid fuel, coal, coke                                                                                                                                     | clean fuel                                                                                   | lung cancer                                                                                                                                 | moderate |
| <b>Mukherjee et al<sup>271</sup></b> | 2014 | India                    | cross-sectional             | 1119   | 0    | 30.1         | biomass                                                                                                                                                    | LPG                                                                                          | respiratory symptoms                                                                                                                        | high     |

|                                       |      |              |                          |        |      |              |                                                                                               |                                                                      |                                                                                    |          |
|---------------------------------------|------|--------------|--------------------------|--------|------|--------------|-----------------------------------------------------------------------------------------------|----------------------------------------------------------------------|------------------------------------------------------------------------------------|----------|
| <b>Mukherjee et al<sup>272</sup></b>  | 2015 | India        | cross-sectional          | 404    | 0    | 34.6         | wood, cow dung and agricultural residues like hay, paddy husk, dried leaf, bamboo, jute stick | liquefied petroleum gas                                              | adverse reproductive outcomes                                                      | high     |
| <b>Murray et al<sup>273</sup></b>     | 2012 | Bangladesh   | prospective cohort study | 6079   | 50   | under 5      | dung, wood, and crop residues                                                                 | natural gas and other non biomass                                    | acute lower respiratory infection                                                  | low      |
| <b>Musafiri et al<sup>274</sup></b>   | 2018 | Rwanda       | prospective cohort study | 436    | 0    | 32.2         | firewood, charcoal and grass/leaves                                                           | liquefied gas petroleum or had not been cooking the last three years | Chronic bronchitis                                                                 | high     |
| <b>Mustapha et al<sup>275</sup></b>   | 2011 | Nigeria      | cross-sectional          | 1397   | NA   | 7-14         | wood or coal, kerosene                                                                        | gas                                                                  | asthma and respiratory symptoms                                                    | high     |
| <b>Mzileni et al<sup>276</sup></b>    | 1999 | South Africa | case-control             | 728    | 64.7 | 57.2         | wood, coal                                                                                    | no exposure to wood, coal                                            | lung cancer                                                                        | moderate |
| <b>Naz et al<sup>277</sup></b>        | 2015 | Bangladesh   | cross-sectional          | 18308  | NA   | under 5      | polluting fuel                                                                                | clean fuel                                                           | neonatal mortality, infant mortality and under-five mortality                      | high     |
| <b>Naz et al<sup>278</sup></b>        | 2016 | India        | cross-sectional          | 166382 | NA   | under 5      | polluting fuel                                                                                | clean fuel                                                           | neonatal mortality, post-neonatal mortality, child mortality                       | high     |
| <b>Naz et al<sup>279</sup></b>        | 2017 | Pakistan     | cross-sectional          | 11507  | 50.9 | under 5      | kerosene, coal/lignite, charcoal, wood, straw/shrubs/grass and animal dung                    | electricity, liquid petroleum gas (LPG), natural gas and biogas      | child mortality                                                                    | high     |
| <b>Naz et al<sup>280</sup></b>        | 2018 | Nepal        | cross-sectional          | 17780  | NA   | under 5      | polluting fuels                                                                               | clean fuels                                                          | neonatal mortality, post-neonatal mortality, child mortality, under-five mortality | high     |
| <b>Neas et al<sup>281</sup></b>       | 1991 | USA          | cross-sectional          | 1567   | NA   | 7-10         | NO2 concentration                                                                             | NA                                                                   | asthma and respiratory symptoms                                                    | high     |
| <b>Neas et al<sup>282</sup></b>       | 1994 | USA          | cross-sectional          | 1237   | NA   | 7-11         | PM2.5                                                                                         | NA                                                                   | asthma and respiratory symptoms                                                    | high     |
| <b>Ngahane et al<sup>283</sup></b>    | 2015 | Cameroon     | cross-sectional          | 300    | 0    | 51.0         | wood                                                                                          | alternative source of energy for cooking                             | chronic bronchitis, dyspnea on exertion                                            | high     |
| <b>Ngocho et al<sup>284</sup></b>     | 2019 | Tanzania     | case-control             | 463    | 59   | 13 months    | biomass, firewood, charcoal, kerosene                                                         | gas or electricity                                                   | community acquired pneumonia                                                       | low      |
| <b>Nisha et al<sup>285</sup></b>      | 2018 | Bangladesh   | cross-sectional          | 27237  | 0    | not reported | kerosene, coal/lignite, charcoal, wood, straw/shrubs/grass, agricultural crop, animal dung    | electricity, liquefied petroleum gas, natural gas, biogas            | stillbirth and early neonatal mortality                                            | high     |
| <b>Nitschke et al<sup>286</sup></b>   | 2006 | Australia    | cross-sectional          | 174    | 54   | 8.0          | NO2 concentration                                                                             | NA                                                                   | asthma symptoms                                                                    | high     |
| <b>Noonan et al<sup>287</sup></b>     | 2007 | USA          | cross-sectional          | 397    | 49   | 6 - 15       | woodstove, fireplace, propane or oil                                                          | electricity                                                          | wheezing in the past 4 weeks                                                       | high     |
| <b>Noonan et al<sup>288</sup></b>     | 2011 | USA          | prospective cohort study | 920    | 50.6 | not reported | improved woodstove                                                                            | older woodstove                                                      | respiratory symptoms                                                               | high     |
| <b>Noorhassim et al<sup>289</sup></b> | 1995 | Malaysia     | cross-sectional          | 1007   | 51.4 | 1-12         | wood                                                                                          | no wood stove                                                        | asthma                                                                             | high     |
| <b>Norback et al<sup>290</sup></b>    | 2019 | China        | cross-sectional          | 39782  | 52   | 4.4          | biomass (coal, wood), natural gas                                                             | only electricity                                                     | doctor diagnosed asthma, current wheeze                                            | high     |
| <b>North et al<sup>291</sup></b>      | 2017 | Uganda       | prospective cohort study | 734    | 30   | 34.0         | wood                                                                                          | charcoal                                                             | chronic cough                                                                      | high     |
| <b>Obaseki et al<sup>292</sup></b>    | 2017 | Nigeria      | cross-sectional          | 1147   | 37   | over 40      | solid fuel                                                                                    | no solid fuel                                                        | respiratory symptoms                                                               | high     |
| <b>Oluwole et al<sup>293</sup></b>    | 2017 | Nigeria      | cross-sectional          | 1690   | 51.7 | 13.6         | biomass fuel                                                                                  | no biomass fuel                                                      | asthma and respiratory symptoms                                                    | high     |

|                                          |      |                                                                                                                                                                                                                                                  |                            |        |      |              |                                                                                          |                                                                      |                                                   |          |
|------------------------------------------|------|--------------------------------------------------------------------------------------------------------------------------------------------------------------------------------------------------------------------------------------------------|----------------------------|--------|------|--------------|------------------------------------------------------------------------------------------|----------------------------------------------------------------------|---------------------------------------------------|----------|
| <b>Orozco-Levi et al<sup>294</sup></b>   | 2006 | Spain                                                                                                                                                                                                                                            | case-control               | 120    | 0    | 71.0         | wood, charcoal smoke                                                                     | not exposed to wood, charcoal smoke                                  | COPD                                              | moderate |
| <b>Ostro et al<sup>295</sup></b>         | 1993 | USA                                                                                                                                                                                                                                              | cohort study               | 321    | 48   | 36.6         | gas stove                                                                                | no gas stove                                                         | any lower respiratory tract symptom or illness    | high     |
| <b>Ostro et al<sup>296</sup></b>         | 1994 | USA                                                                                                                                                                                                                                              | cross-sectional            | 256    | 33.8 | 44.3         | gas, wood or fireplace                                                                   | no gas, wood or fireplace                                            | respiratory symptoms                              | high     |
| <b>Owili et al<sup>297</sup></b>         | 2017 | 23 subsaharan african countries (Benin, Bukina Faso, Burundi, Comoros, Congo, Côte d'Ivoire, DRC, Ethiopia, Gabon, Gambia, Guinea, Kenya, Liberia, Mali, Mozambique, Nigeria, Namibia, Rwanda, Sierra Leone, Togo, Uganda, Zambia, and Zimbabwe) | cross-sectional            | 783691 | NA   | under 5      | biomass fuel, charcoal, coal, lignite or paraffin/kerosene                               | clean fuel                                                           | under-five mortality                              | high     |
| <b>Oxlade et al<sup>298</sup></b>        | 2012 | India                                                                                                                                                                                                                                            | cross-sectional            | 198754 | 0    | not reported | biomass fuel                                                                             | no biomass fuel                                                      | tuberculosis                                      | high     |
| <b>Ozturk et al<sup>299</sup></b>        | 2014 | Turkey                                                                                                                                                                                                                                           | case-control               | 771    | 100  | 36.8         | coal or wood                                                                             | not coal or wood                                                     | pulmonary tuberculosis                            | moderate |
| <b>Padhi et al<sup>300</sup></b>         | 2008 | India                                                                                                                                                                                                                                            | cross-sectional            | 1505   | NA   | 5-10         | biomass fuel, LPG                                                                        | no biomass fuel, LPG                                                 | asthma and respiratory symptoms                   | high     |
| <b>Pan et al<sup>301</sup></b>           | 2002 | China                                                                                                                                                                                                                                            | retrospective cohort study | 467    | 52.5 | 36.1         | charcoal stove                                                                           | no charcoal stove                                                    | asthma                                            | high     |
| <b>Pandey et al<sup>302</sup></b>        | 2012 | India                                                                                                                                                                                                                                            | cross-sectional            | 34472  | 0    | 32.1         | coal, wood, straw, shrubs, grass, agricultural crop waste, dung cakes, lignite, charcoal | electricity, liquid petroleum gas or Natural gas, biogas or Kerosene | child mortality                                   | high     |
| <b>Panigrahi et al<sup>303</sup></b>     | 2018 | India                                                                                                                                                                                                                                            | cross-sectional            | 1120   | 0    | 30.0         | solid biomass fuel                                                                       | LPG                                                                  | chronic bronchitis                                | high     |
| <b>Pant et al<sup>304</sup></b>          | 2012 | Nepal                                                                                                                                                                                                                                            | cross-sectional            | 2142   | 49   | 27.0         | dung                                                                                     | biogas                                                               | asthma                                            | high     |
| <b>Patel et al<sup>305</sup></b>         | 2013 | India                                                                                                                                                                                                                                            | cross-sectional            | 35954  | 51   | 0-36 months  | wood, agricultural waste, dung, or straw, coal/lignite, charcoal, or kerosene            | liquid petroleum gas/natural gas, electricity                        | acute respiratory infection                       | high     |
| <b>Patel et al<sup>306</sup></b>         | 2015 | Guatemala, India, Kenya, Pakistan, Zambia                                                                                                                                                                                                        | prospective cohort study   | 65912  | 0    | not reported | Polluting fuels                                                                          | clean fuels                                                          | perinatal mortality                               | low      |
| <b>Patel et al<sup>307</sup></b>         | 2019 | India                                                                                                                                                                                                                                            | cross-sectional            | 932341 | 52.4 | under 5      | biomass fuel                                                                             | no biomass fuel                                                      | acute respiratory infection                       | high     |
| <b>Pathirathna et al<sup>308</sup></b>   | 2017 | Sri Lanka                                                                                                                                                                                                                                        | prospective cohort study   | 76     | 0    | 29.0         | wood                                                                                     | no wood                                                              | low birthweight                                   | high     |
| <b>Patra et al<sup>309</sup></b>         | 2012 | India                                                                                                                                                                                                                                            | case-control               | 400    | NA   | under 14     | biomass fuel                                                                             | LPG                                                                  | tuberculosis                                      | high     |
| <b>Patra et al<sup>310</sup></b>         | 2016 | 51 countries                                                                                                                                                                                                                                     | cross-sectional            | 112711 | 46.3 | not reported | solid fuel                                                                               | no solid fuel                                                        | wheeze, asthma                                    | high     |
| <b>Paulin et al<sup>311</sup></b>        | 2017 | USA                                                                                                                                                                                                                                              | cohort study               | 30     | 67   | 9.8          | NO2 concentration                                                                        | NA                                                                   | asthma symptoms                                   | high     |
| <b>Peabody et al<sup>312</sup></b>       | 2005 | China                                                                                                                                                                                                                                            | cross-sectional            | 6923   | 35.2 | 29.2         | wood, crop residues, cleaner fuels                                                       | coal                                                                 | COPD, Asthma                                      | high     |
| <b>Perez-Padilla et al<sup>313</sup></b> | 1996 | Mexico                                                                                                                                                                                                                                           | case-control               | 502    | 0    | 56.3         | wood                                                                                     | no wood                                                              | Chronic airway obstruction and chronic bronchitis | low      |
| <b>Perez-Padilla et al<sup>314</sup></b> | 2001 | Mexico                                                                                                                                                                                                                                           | case-control               | 925    | 45.7 | 39.3         | wood stove                                                                               | never used wood stoves                                               | tuberculosis                                      | low      |
| <b>Pershagen et al<sup>315</sup></b>     | 1995 | Sweden                                                                                                                                                                                                                                           | case-control               | 547    | 56.8 | under 4      | gas stove                                                                                | no gas stove                                                         | wheezing                                          | moderate |

|                                        |      |                    |                          |         |      |              |                                                                |                             |                                                                      |          |
|----------------------------------------|------|--------------------|--------------------------|---------|------|--------------|----------------------------------------------------------------|-----------------------------|----------------------------------------------------------------------|----------|
| <b>Phillips et al<sup>316</sup></b>    | 2018 | England, Wales     | geographical study       | 3535136 | NA   | 35-74        | solid fuel                                                     | no solid fuel               | all cause mortality, cardiovascular mortality, respiratory mortality | high     |
| <b>Phoa et al<sup>317</sup></b>        | 2004 | Australia          | cross-sectional          | 627     | 46.7 | 8-11         | fume emitting heating                                          | non-fume emitting heating   | asthma                                                               | high     |
| <b>Phukan et al<sup>318</sup></b>      | 2014 | India              | case-control             | 690     | 0    | 58.7         | coal, wood                                                     | LPG                         | lung cancer                                                          | low      |
| <b>Piekarska et al<sup>319</sup></b>   | 2018 | Poland             | cross-sectional          | 18617   | 46.2 | 6-44         | solid fuel, electric heaters                                   | other heating sources       | asthma                                                               | high     |
| <b>Pokharel et al<sup>320</sup></b>    | 2001 | India              | case-control             | 120     | 67.5 | 12.4         | biomass fuel                                                   | no exposure to biomass fuel | bronchial asthma                                                     | high     |
| <b>Pokhrel et al<sup>321</sup></b>     | 2010 | Nepal              | case-control             | 375     | 0    | 35.0         | kerosene, biomass, coal                                        | gas or electricity          | tuberculosis                                                         | low      |
| <b>Ponsonby et al<sup>322</sup></b>    | 2000 | Australia          | prospective cohort study | 863     | 69   | 7.0          | gas                                                            | no gas                      | asthma                                                               | high     |
| <b>Ponsonby et al<sup>323</sup></b>    | 2001 | Australia          | cross-sectional          | 440     | NA   | 9.1          | gas                                                            | no gas                      | asthma                                                               | high     |
| <b>Pope et al<sup>324</sup></b>        | 1993 | China              | cross-sectional          | 973     | 0    | 20 to 40     | coal                                                           | no exposure to coal         | chest illness, cough, phlegm, shortness of breath, wheeze            | high     |
| <b>Praygod et al<sup>325</sup></b>     | 2016 | Tanzania           | case-control             | 117     | 53   | under 5      | wood, charcoal                                                 | gas or electricity          | severe pneumonia                                                     | high     |
| <b>Prietsch et al<sup>326</sup></b>    | 2006 | Brazil             | cross-sectional          | 685     | NA   | not reported | Inadequate heating (combustion)/wood burning stove for cooking | NA                          | wheezing                                                             | high     |
| <b>Qian et al<sup>327</sup></b>        | 2000 | China              | cross-sectional          | 2789    | 35.3 | not reported | coal                                                           | no coal                     | respiratory symptoms                                                 | high     |
| <b>Qian et al<sup>328</sup></b>        | 2004 | China              | cross-sectional          | 7058    | NA   | 38.4         | Coal smoke for cooking/heating                                 | NA                          | wheezing, bronchitis, asthma                                         | high     |
| <b>Qian et al<sup>329</sup></b>        | 2007 | China              | cross-sectional          | 2517    | 100  | 5-14         | Coal smoke for cooking/heating                                 | NA                          | wheezing, bronchitis, asthma                                         | high     |
| <b>Qin et al<sup>330</sup></b>         | 2002 | China              | case-control             | 252     | 0    | 57.7         | LPG, coal                                                      | no LPG or coal              | lung cancer                                                          | moderate |
| <b>Qu et al<sup>331</sup></b>          | 2015 | China              | cross-sectional          | 13424   | 46.7 | 48.5         | solid fuel                                                     | no solid fuel               | stroke, coronary heart disease                                       | high     |
| <b>Rabbani et al<sup>332</sup></b>     | 2017 | India              | case-control             | 356     | 0    | 34.0         | biomass                                                        | cleaner fuel                | tuberculosis                                                         | high     |
| <b>Rahut et al<sup>333</sup></b>       | 2017 | Bhutan             | cross-sectional          | 6551    | NA   | not reported | wood, kerosene, dung, charcoal, leaves                         | electricity, LPG            | tuberculosis                                                         | high     |
| <b>Ram et al<sup>334</sup></b>         | 2014 | Bangladesh         | case-control             | 994     | 50.3 | under 5      | LPG, petroleum gas or kerosene                                 | wood or bamboo              | pneumonia                                                            | moderate |
| <b>Ramanakumar et al<sup>335</sup></b> | 2007 | Canada             | case-control             | 2746    | 60.6 | 35-75        | wood or coal                                                   | no wood or coal             | lung cancer                                                          | moderate |
| <b>Ramani et al<sup>336</sup></b>      | 2016 | India              | cohort study             | 400     | 44.8 | under 5      | LPG and wood                                                   | no wood and LPG             | acute respiratory infection                                          | high     |
| <b>Rana et al<sup>337</sup></b>        | 2019 | Afghanistan        | cross-sectional          | 27565   | 0    | 51.7         | solid fuel                                                     | no solid fuel               | Acute respiratory infection                                          | high     |
| <b>Raspanti et al<sup>338</sup></b>    | 2016 | Nepal              | case-control             | 1212    | 59.2 | over 18      | wood, charcoal, agricultural waste                             | electricity and natural gas | lung cancer                                                          | low      |
| <b>Regalado et al<sup>339</sup></b>    | 2006 | Mexico             | cross-sectional          | 841     | 0    | 38 and over  | Biomass                                                        | Gas                         | COPD                                                                 | low      |
| <b>Rehfuess et al<sup>340</sup></b>    | 2009 | Sub Saharan Africa | cross-sectional          | 32620   | NA   | under 5      | cooking with solid fuel                                        | cooking with cleaner fuel   | ALRI mortality in children <5 years age                              | high     |

|                                             |      |                        |                             |       |      |                          |                                        |                                             |                                                                               |          |
|---------------------------------------------|------|------------------------|-----------------------------|-------|------|--------------------------|----------------------------------------|---------------------------------------------|-------------------------------------------------------------------------------|----------|
| <b>Rey-Ares et al<sup>341</sup></b>         | 2016 | Argentina, Chile       | retrospective cohort study  | 1074  | NA   | under 5                  | Exposure to Household air pollution    | Households not exposed to HAP               | Lower respiratory tract infection (LRTI)                                      | moderate |
| <b>Rinne et al<sup>342</sup></b>            | 2007 | Ecuador                | cross-sectional             | 212   | 54.2 | under 16                 | biomass fuel                           | LPG only                                    | infant mortality and respiratory symptoms                                     | high     |
| <b>Riojas-Rodriguez et al<sup>343</sup></b> | 2001 | Mexico                 | prospective cohort study    | 56    | 23.2 | not reported             | Ceta stove                             | open fire                                   | respiratory symptoms                                                          | high     |
| <b>Robin et al<sup>344</sup></b>            | 1996 | Arizona, United States | case-control                | 90    | 60   | 1 - 24 months of age     | wood                                   | gas, electricity                            | acute respiratory infection                                                   | low      |
| <b>Romieu et al<sup>345</sup></b>           | 2009 | Mexico                 | randomised-controlled trial | 552   | NA   | 25.9                     | improved stove                         | open fire                                   | respiratory symptoms                                                          | high     |
| <b>Rudnai et al<sup>346</sup></b>           | 2008 | Hungary                | cross-sectional             | 6670  | 50.3 | 9-10                     | wood, coal                             | no wood, coal                               | bronchitic and asthmatic symptoms                                             | high     |
| <b>Rumchev et al<sup>347</sup></b>          | 2016 | Myanmar                | cross-sectional             | 80    | NA   | under 6                  | biomass fuel                           | no biomass fuel                             | respiratory symptoms                                                          | high     |
| <b>Rumchev et al<sup>348</sup></b>          | 2017 | India                  | cross-sectional             | 478   | NA   | 30.13, children under 15 | biomass                                | liquid petroleum gas or kerosene            | respiratory symptoms                                                          | high     |
| <b>Rylance et al<sup>349</sup></b>          | 2019 | Malawi                 | cross-sectional             | 804   | 48.1 | 7.1                      | wood, crop waste, charcoal             | wood, crop waste, charcoal                  | chronic cough, current wheeze, symptoms of severe asthma, shortness of breath | high     |
| <b>Salo et al<sup>350</sup></b>             | 2004 | China                  | cross-sectional             | 5231  | 52.5 | 13.6                     | coal                                   | no coal                                     | respiratory symptoms                                                          | high     |
| <b>Sama et al<sup>351</sup></b>             | 2017 | USA                    | case-control                | 171   | 40   | 70.0                     | wood and gas stove                     | no wood or gas stove                        | COPD exacerbation                                                             | high     |
| <b>Samet et al<sup>352</sup></b>            | 1993 | USA                    | prospective cohort study    | 1205  | 52.1 | not reported             | gas stove                              | electric stove                              | respiratory symptoms                                                          | high     |
| <b>Samuel et al<sup>353</sup></b>           | 2018 | Nigeria                | cross-sectional             | 10983 | NA   | not reported             | coal, cow dung, firewood and charcoal  | electricity, liquid petroleum gas, kerosene | under-five mortality                                                          | high     |
| <b>Sana et al<sup>354</sup></b>             | 2019 | Burkina Faso           | cross-sectional             | 1705  | 0    | 36.0                     | firewood, charcoal                     | liquid petroleum gas                        | acute and chronic respiratory symptoms                                        | high     |
| <b>Sanbata et al<sup>355</sup></b>          | 2014 | Ethiopia               | cross-sectional             | 422   | 67.5 | under 5                  | biomass or kerosene; traditional stove | LPG and electricity; clean stove            | acute respiratory infection                                                   | high     |
| <b>Sanya et al<sup>356</sup></b>            | 2014 | Uganda                 | case-control                | 86    | 39.5 | 36.0                     | wood or charcoal                       | no wood or charcoal                         | asthma exacerbation                                                           | high     |
| <b>Sapkota et al<sup>357</sup></b>          | 2008 | India                  | case-control                | 1517  | 85.8 | not reported             | solid fuel, wood, coal, mixed/other    | modern fuel                                 | lung cancer                                                                   | low      |
| <b>Sasco et al<sup>358</sup></b>            | 2002 | Morocco                | case-control                | 353   | 96.6 | 59.0                     | coal                                   | no coal                                     | lung cancer                                                                   | high     |
| <b>Savitha et al<sup>359</sup></b>          | 2007 | India                  | case-control                | 208   | 58.2 | under 5                  | wood, dung, kerosene                   | LPG                                         | acute lower respiratory tract infection                                       | high     |
| <b>Schei et al<sup>360</sup></b>            | 2004 | Guatemala              | cross-sectional             | 1058  | 48   | 4-6                      | open fire                              | plancha stove                               | asthma and asthma related symptoms                                            | high     |
| <b>Sezer et al<sup>361</sup></b>            | 2006 | Turkey                 | case-control                | 148   | 0    | 56.7                     | wood and biomass                       | no exposure to wood or biomass              | COPD                                                                          | high     |
| <b>Shah et al<sup>362</sup></b>             | 1994 | India                  | case-control                | 400   | 57   | 2 months - 5 years       | smoke producing stove                  | no smoke producing stove                    | severe pneumonia                                                              | low      |
| <b>Sharma et al<sup>363</sup></b>           | 1998 | India                  | prospective cohort study    | 642   | 52.4 | under 5                  | wood                                   | kerosene                                    | Lower respiratory tract infection                                             | high     |
| <b>Sharma et al<sup>364</sup></b>           | 2013 | India                  | cross-sectional             | 500   | 51.4 | under 1                  | smoky fuel                             | smokeless fuel                              | acute respiratory infection                                                   | high     |

|                                            |      |                                                     |                             |         |      |                 |                                                                                           |                                                           |                                                                                            |          |
|--------------------------------------------|------|-----------------------------------------------------|-----------------------------|---------|------|-----------------|-------------------------------------------------------------------------------------------|-----------------------------------------------------------|--------------------------------------------------------------------------------------------|----------|
| <b>Shen et al<sup>365</sup></b>            | 2009 | China                                               | retrospective cohort study  | 42422   | NA   | not reported    | stove improvement, smokeless coal                                                         | fire-pit or stove without a chimney and no smokeless coal | pneumonia                                                                                  | high     |
| <b>Shetty et al<sup>366</sup></b>          | 2006 | India                                               | case-control                | 370     | 58   | 15 to 83        | biomass fuel                                                                              | gas/electric                                              | tuberculosis                                                                               | high     |
| <b>Shima et al<sup>367</sup></b>           | 2000 | Japan                                               | prospective cohort study    | 842     | 51.5 | 9-10            | NO2 concentration                                                                         | NA                                                        | asthma, wheeze                                                                             | high     |
| <b>Shirinde et al<sup>368</sup></b>        | 2014 | South Africa                                        | cross-sectional             | 3468    | 47.7 | 13-14           | LPG, paraffin, wood, coal                                                                 | electricity                                               | wheeze                                                                                     | high     |
| <b>Shrestha et al<sup>369</sup></b>        | 2005 | Nepal                                               | cross-sectional             | 168     | 6    | 36.1            | unprocessed solid fuels                                                                   | processed fuels                                           | acute respiratory infection, COPD/Asthma and respiratory symptoms                          | high     |
| <b>Siddharthan et al<sup>370</sup></b>     | 2018 | Argentina, Chile, Uruguay, Peru, Bangladesh, Uganda | cross-sectional             | 12396   | 51.5 | 54.9            | biomass                                                                                   | no exposure to biomass                                    | COPD                                                                                       | low      |
| <b>Siddiqui et al<sup>371</sup></b>        | 2005 | Pakistan                                            | cross-sectional             | 122     | 0    | 28.6            | wood                                                                                      | natural gas                                               | respiratory symptoms                                                                       | high     |
| <b>Siddiqui et al<sup>372</sup></b>        | 2008 | Pakistan                                            | retrospective cohort study  | 634     | NA   | 24.7            | wood                                                                                      | natural gas                                               | low birth weight                                                                           | high     |
| <b>Sikolia et al<sup>373</sup></b>         | 2002 | Kenya                                               | cross-sectional             | 300     | NA   | under 5         | Firewood, kerosene                                                                        | Charcoal                                                  | acute respiratory infection                                                                | high     |
| <b>Singh et al<sup>374</sup></b>           | 2002 | India                                               | cross-sectional             | 2275    | 55.1 | 7.8             | smoke producing fuel                                                                      | no smoke producing fuel                                   | cough                                                                                      | high     |
| <b>Sloan et al<sup>375</sup></b>           | 2012 | USA                                                 | case-control                | 528     | 43   | not reported    | wood or coal                                                                              | no wood or coal                                           | lung cancer                                                                                | moderate |
| <b>Smith et al<sup>376</sup></b>           | 2000 | Australia                                           | cross-sectional             | 129     | 55   | not reported    | NO2 concentration                                                                         | NA                                                        | asthma symptoms                                                                            | high     |
| <b>Smith et al<sup>377</sup></b>           | 2011 | Guatemala                                           | Randomised-controlled trial | 518     | NA   | under 18 months | locally developed chimney stove                                                           | open wood fires                                           | pneumonia                                                                                  | low      |
| <b>Smith-Sivertsen et al<sup>378</sup></b> | 2009 | Guatemala                                           | randomised-controlled trial | 504     | 0    | 27.7            | improved stove                                                                            | open fire                                                 | respiratory symptoms                                                                       | high     |
| <b>Sobue et al<sup>379</sup></b>           | 1990 | Japan                                               | case-control                | 875     | 0    | 56.7            | wood or straw; for heating kerosene, gas, coal, charcoal and wood stoves without chimneys | no wood, straw or coal                                    | lung cancer                                                                                | moderate |
| <b>Solis-Soto et al<sup>380</sup></b>      | 2013 | Bolivia                                             | cross-sectional             | 2340    | 47.9 | 11.0            | wood or coal                                                                              | gas or electricity                                        | asthma symptoms                                                                            | high     |
| <b>Sood et al<sup>381</sup></b>            | 2010 | USA                                                 | prospective cohort study    | 1861    | 19.2 | not reported    | wood                                                                                      | no wood                                                   | airflow obstruction and chronic bronchitis                                                 | high     |
| <b>Soto-Moreno et al<sup>382</sup></b>     | 2013 | Columbia                                            | cross-sectional             | 2085832 | 51.9 | not reported    | solid fuel                                                                                | no solid fuel                                             | cardiovascular and respiratory limitation                                                  | high     |
| <b>Speizer et al<sup>383</sup></b>         | 1980 | USA                                                 | prospective cohort study    | 9280    | NA   | 6-10            | gas                                                                                       | electricity                                               | bronchitis, serious respiratory illness before age 2, respiratory illness in the last year | high     |
| <b>Spengler et al<sup>384</sup></b>        | 2004 | Russia                                              | cross-sectional             | 5951    | NA   | 8-12            | gas                                                                                       | no gas                                                    | asthma, wheeze, cough                                                                      | high     |
| <b>Sreeramareddy et al<sup>385</sup></b>   | 2011 | India                                               | cross-sectional             | 47139   | NA   | not reported    | wood, straw, animal dung, and crop residues, kerosene, coal                               | electricity, liquid petroleum gas, natural gas and biogas | low birth weight                                                                           | high     |
| <b>Stankovic et al<sup>386</sup></b>       | 2011 | Serbia                                              | cross-sectional             | 1082    | 0    | not reported    | biomass                                                                                   | no biomass                                                | respiratory symptoms and disease                                                           | low      |
| <b>Stankovic et al<sup>387</sup></b>       | 2011 | Serbia                                              | cross-sectional             | 367     | 0    | 20-40           | fossil fuel smoke                                                                         | central heating or electricity                            | respiratory symptoms, stillbirth                                                           | high     |
| <b>Stein et al<sup>388</sup></b>           | 2008 | South Africa                                        | case-control                | 9690    | 35   | 52.0            | wood, charcoal, coal, anthracite, paraffin, or gas                                        | electricity                                               | lung cancer and cardiovascular disease                                                     | low      |

|                                        |      |                          |                             |       |      |                                     |                                           |                                                      |                                                                                                                         |          |
|----------------------------------------|------|--------------------------|-----------------------------|-------|------|-------------------------------------|-------------------------------------------|------------------------------------------------------|-------------------------------------------------------------------------------------------------------------------------|----------|
| <b>Strachan et al<sup>389</sup></b>    | 1995 | UK                       | case-control                | 961   | NA   | 11 to 16                            | gas                                       | no gas                                               | wheeze                                                                                                                  | high     |
| <b>Sukhsohale et al<sup>390</sup></b>  | 2013 | India                    | cross-sectional             | 760   | 0    | 32.5                                | biomass, kerosene, mixed                  | LPG                                                  | asthma                                                                                                                  | high     |
| <b>Sun et al<sup>391</sup></b>         | 1992 | China                    | case-control                | 816   | 0    | 30 to 69                            | bituminous coal, brazier                  | no exposure to bituminous coal, brazier              | lung cancer                                                                                                             | moderate |
| <b>Sun et al<sup>392</sup></b>         | 2002 | China                    | case-control                | 618   | NA   | not reported                        | coal stove, kang, gas                     | no coal stove, no kang, no gas                       | lung cancer                                                                                                             | high     |
| <b>Sunyer et al<sup>393</sup></b>      | 2004 | United Kingdom and Spain | prospective cohort study    | 1611  | NA   | under 1                             | gas stove and gas heating                 | no gas stove or heating                              | lower respiratory tract infection                                                                                       | high     |
| <b>Suryadhi et al<sup>394</sup></b>    | 2019 | Indonesia                | cross-sectional             | 36842 | 52   | 4.8                                 | solid fuel                                | clean fuel                                           | low birth weight, neonatal death, infant death, acute upper respiratory infection and acute lower respiratory infection | high     |
| <b>Svensen et al<sup>395</sup></b>     | 2018 | USA                      | cross-sectional             | 5210  | 50.1 | not reported                        | wood, fireplace, portable gas heater      | portable electric heater                             | asthma                                                                                                                  | high     |
| <b>Tamire et al<sup>396</sup></b>      | 2020 | Ethiopia                 | cross-sectional             | 545   | 0    | 30.3                                | solid fuel                                | cleaner fuel                                         | symptoms                                                                                                                | high     |
| <b>Tan et al<sup>397</sup></b>         | 2015 | Canada                   | cross-sectional             | 5176  | 42.8 | 57.0                                | coal or coke, wood, crop residues or dung | < 10 years coal or coke, wood, crop residues or dung | COPD                                                                                                                    | low      |
| <b>Tavernier et al<sup>398</sup></b>   | 2006 | United Kingdom           | case-control                | 200   | 42.5 | 4-17                                | LPG                                       | no LPG                                               | asthma                                                                                                                  | high     |
| <b>Taylor et al<sup>399</sup></b>      | 2012 | Sierra Leone             | cross-sectional             | 1040  | 0    | Women age 15 - 45; Children under 5 | wood                                      | charcoal                                             | acute respiratory infections                                                                                            | high     |
| <b>Tazinya et al<sup>400</sup></b>     | 2018 | Cameroon                 | cross-sectional             | 512   | 56.8 | under 5                             | wood smoke                                | no wood smoke                                        | Acute respiratory infection                                                                                             | high     |
| <b>Thacher et al<sup>401</sup></b>     | 2013 | Nigeria                  | cross-sectional             | 299   | 45.2 | 5-11                                | biomass fuel                              | no biomass fuel                                      | asthma symptoms                                                                                                         | high     |
| <b>Thompson et al<sup>402</sup></b>    | 2011 | Guatemala                | randomised-controlled trial | 266   | 0    | 26.4                                | improved stoves                           | open fire                                            | birth weight                                                                                                            | low      |
| <b>Tielsch et al<sup>403</sup></b>     | 2009 | India                    | prospective cohort study    | 11728 | 0    | not reported                        | wood or dung                              | no wood or dung                                      | birth weight, low birth weight, preterm birth, stillbirth, neonatal mortality, acute respiratory infection              | low      |
| <b>Tin et al<sup>404</sup></b>         | 2016 | New Zealand              | prospective cohort study    | 6112  | 0    | not reported                        | gas, electricity, wood                    | no gas, electricity or wood                          | acute respiratory infection                                                                                             | low      |
| <b>Trang et al<sup>405</sup></b>       | 2010 | USA                      | case-control                | 1412  | 53   | not reported                        | LPG, wood                                 | no LPG, wood                                         | asthma                                                                                                                  | high     |
| <b>Tripathy et al<sup>406</sup></b>    | 2017 | India                    | cross-sectional             | 3571  | 55.3 | not reported                        | unclean fuel                              | clean fuel                                           | Neonatal, Postneonatal and Maternal Deaths                                                                              | high     |
| <b>Tse et al<sup>407</sup></b>         | 2011 | China                    | case-control                | 2277  | 100  | 66.0                                | gas, liquid fuel and solid fuel           | never cooked or electricity                          | lung cancer                                                                                                             | high     |
| <b>Tumwesigire et al<sup>408</sup></b> | 1995 | Uganda                   | cross-sectional             | 152   | 53.3 | 2.1                                 | gas or electricity                        | wood or charcoal                                     | acute respiratory infection                                                                                             | high     |
| <b>Tuthill et al<sup>409</sup></b>     | 1984 | USA                      | cross-sectional             | 399   | NA   | not reported                        | woodstove                                 | no woodstove                                         | acute respiratory illness                                                                                               | high     |
| <b>Upadhyay et al<sup>410</sup></b>    | 2015 | India                    | prospective cohort study    | 3961  | 53.5 | 3.1                                 | solid fuel                                | cleaner fuel                                         | life threatening respiratory illness                                                                                    | high     |
| <b>Uzun et al<sup>411</sup></b>        | 2003 | Turkey                   | cross-sectional             | 177   | 0    | 41.0                                | biomass                                   | no biomass                                           | COPD and asthma                                                                                                         | high     |



|                                       |      |              |                          |        |      |                                                          |                                                                           |                                              |                                                                     |          |
|---------------------------------------|------|--------------|--------------------------|--------|------|----------------------------------------------------------|---------------------------------------------------------------------------|----------------------------------------------|---------------------------------------------------------------------|----------|
| <b>van Gemert et al<sup>412</sup></b> | 2016 | Uganda       | cross-sectional          | 588    | 49.5 | 45.8                                                     | biomass fuel                                                              | no biomass fuel                              | COPD                                                                | moderate |
| <b>van Miert et al<sup>413</sup></b>  | 2012 | Belgium      | cross-sectional          | 744    | 45   | 15.2                                                     | wood                                                                      | no wood                                      | asthma, pneumonia                                                   | high     |
| <b>van Strien et al<sup>414</sup></b> | 2004 | USA          | cross-sectional          | 768    | 49   | under 2                                                  | NO2                                                                       | NA                                           | respiratory symptoms                                                | high     |
| <b>Van Vliet et al<sup>415</sup></b>  | 2019 | Ghana        | cross-sectional          | 1183   | 0    | 27.3                                                     | CO concentration                                                          | NA                                           | Respiratory symptoms                                                | high     |
| <b>Vasudeva et al<sup>416</sup></b>   | 2010 | India        | cross-sectional          | 124395 | 0    | 15-49                                                    | kerosene, wood, and agricultural products                                 | Liquid petroleum gas; electricity and biogas | asthma                                                              | high     |
| <b>Veigi et al<sup>417</sup></b>      | 1991 | Italy        | cross-sectional          | 3289   | 46.1 | 8-64                                                     | LPG                                                                       | no LPG                                       | respiratory symptoms                                                | high     |
| <b>Venn et al<sup>418</sup></b>       | 2001 | Ethiopia     | cross-sectional          | 9844   | 47   | 18.0                                                     | non-biomass fuel                                                          | biomass fuel                                 | respiratory symptoms                                                | high     |
| <b>Victoria et al<sup>419</sup></b>   | 1994 | Brazil       | case-control             | 1032   | 54.1 | under 2                                                  | woodstove, fireplace, open-air fire                                       | no woodstove, fireplace, open-air fire       | pneumonia                                                           | high     |
| <b>Viegi et al<sup>420</sup></b>      | 1992 | Italy        | cross-sectional          | 3185   | 38.8 | not reported                                             | bottled gas, wood, kerosene, oil, coal                                    | natural gas                                  | respiratory symptoms and physician diagnosed respiratory conditions | high     |
| <b>Volkmer et al<sup>421</sup></b>    | 1995 | Australia    | cross-sectional          | 14124  | NA   | 4-5                                                      | natural gas, wood                                                         | no natural gas or wood                       | asthma, wheeze, bronchitis, dry cough                               | high     |
| <b>von Maffei et al<sup>422</sup></b> | 2001 | USA          | cross-sectional          | 2409   | NA   | under 18                                                 | gas, kerosene, wood, coal, fireplace                                      | no gas, kerosene, wood, coal, fireplace      | asthma                                                              | high     |
| <b>von Mutius et al<sup>423</sup></b> | 1996 | Germany      | cross-sectional          | 1958   | NA   | 11                                                       | coal or wood                                                              | no coal or wood                              | asthma                                                              | high     |
| <b>Wafula et al<sup>424</sup></b>     | 2000 | Kenya        | case-control             | 648    | NA   | women between 15 and 60 years and children under 5 years | traditional 3 stone stove                                                 | improved stove                               | acute respiratory infection                                         | high     |
| <b>Walker et al<sup>425</sup></b>     | 2020 | Honduras     | cross-sectional          | 150    | 0    | 37.0                                                     | Traditional stove, older Justa stove, newer Justa stove, PM concentration | Justa stove, newer Justa stove               | Respiratory symptoms                                                | high     |
| <b>Wang et al<sup>426</sup></b>       | 1992 | China        | case-control             | 308    | NA   | not reported                                             | coal                                                                      | no coal                                      | lung cancer                                                         | high     |
| <b>Wang et al<sup>427</sup></b>       | 1996 | China        | case-control             | 270    | 0    | not reported                                             | coal, kang                                                                | no coal, kang                                | lung cancer                                                         | high     |
| <b>Wang et al<sup>428</sup></b>       | 2013 | China        | cross-sectional          | 4618   | 53.7 | 4.7                                                      | gas or electricity                                                        | coal or wood                                 | asthma, pneumonia and wheeze                                        | high     |
| <b>Ware et al<sup>429</sup></b>       | 1984 | USA          | prospective cohort study | 8384   | NA   | 6-7                                                      | gas                                                                       | no gas                                       | bronchitis, respiratory illness before age of 2                     | high     |
| <b>Ware et al<sup>430</sup></b>       | 2014 | USA          | cross-sectional          | 561    | 53.6 | under 18                                                 | woodstove                                                                 | fuel oil                                     | pneumonia, asthma, bronchitis, wheeze, cough                        | high     |
| <b>Wayse et al<sup>431</sup></b>      | 2004 | India        | case-control             | 150    | 59.3 | 2.0                                                      | liquid petroleum gas                                                      | biomass                                      | severe acute lower respiratory infection                            | moderate |
| <b>Weber et al<sup>432</sup></b>      | 2020 | Ghana        | prospective cohort study | 1010   | 0    | 28.3                                                     | polluting fuel                                                            | Clean fuel                                   | perinatal mortality, low birth weight, stillbirth                   | low      |
| <b>Wichmann et al<sup>433</sup></b>   | 2006 | South Africa | cross-sectional          | 4679   | 50.4 | under 5                                                  | smoke pollution fuels                                                     | clean fuels                                  | acute lower respiratory infection                                   | high     |
| <b>Wichmann et al<sup>434</sup></b>   | 2006 | South Africa | cross-sectional          | 3556   | 0    | not reported                                             | polluting fuel                                                            | clean fuel                                   | under-five mortality                                                | high     |
| <b>Wichmann et al<sup>435</sup></b>   | 2009 | South Africa | cross-sectional          | 2437   | 50.4 | 5.0                                                      | combination of dirty and clean fuel                                       | clean fuel                                   | wheeze                                                              | high     |

|                                         |      |                                                                                                                                                                                                                                  |                          |        |      |               |                                                                          |                                                                      |                                                                      |          |
|-----------------------------------------|------|----------------------------------------------------------------------------------------------------------------------------------------------------------------------------------------------------------------------------------|--------------------------|--------|------|---------------|--------------------------------------------------------------------------|----------------------------------------------------------------------|----------------------------------------------------------------------|----------|
| <b>Willers et al<sup>436</sup></b>      | 2006 | the Netherlands                                                                                                                                                                                                                  | cohort study             | 3148   | NA   | 6-7           | gas                                                                      | electricity                                                          | respiratory symptoms                                                 | high     |
| <b>Withers et al<sup>437</sup></b>      | 1998 | United Kingdom                                                                                                                                                                                                                   | prospective cohort study | 2289   | NA   | 14-16         | gas                                                                      | no gas                                                               | wheeze                                                               | high     |
| <b>Woldeamanuel et al<sup>438</sup></b> | 2019 | Ethiopia                                                                                                                                                                                                                         | cross-sectional          | 779    | 57.4 | over 30       | biomass fuel                                                             | no biomass fuel                                                      | COPD                                                                 | moderate |
| <b>Woldesemayat et al<sup>439</sup></b> | 2014 | Ethiopia                                                                                                                                                                                                                         | case-control             | 1159   | 58.9 | 33.6          | biomass                                                                  | no biomass                                                           | tuberculosis                                                         | high     |
| <b>Wolff et al<sup>440</sup></b>        | 2012 | Madagascar                                                                                                                                                                                                                       | cross-sectional          | 1236   | 48.4 | 10.3          | electricity                                                              | charcoal or gas                                                      | asthma                                                               | high     |
| <b>Wong et al<sup>441</sup></b>         | 2004 | China                                                                                                                                                                                                                            | cross-sectional          | 10902  | 51.3 | 10.0          | gas                                                                      | no gas                                                               | current wheeze                                                       | high     |
| <b>Wong et al<sup>442</sup></b>         | 2013 | 47 countries                                                                                                                                                                                                                     | cross-sectional          | 512707 | NA   | 6-7 and 13-14 | open fire                                                                | not open fire                                                        | asthma and respiratory symptoms                                      | high     |
| <b>Wong et al<sup>443</sup></b>         | 2019 | China                                                                                                                                                                                                                            | case-control             | 1524   | 0    | 54.7          | ever smoky coal users                                                    | Wood/dung/Smokeless coal users from Smokeless coal regions           | lung cancer                                                          | moderate |
| <b>Wu et al<sup>444</sup></b>           | 1985 | USA                                                                                                                                                                                                                              | case-control             | 440    | NA   | 60.2          | coal                                                                     | no coal                                                              | lung cancer                                                          | high     |
| <b>Wu et al<sup>445</sup></b>           | 2010 | China                                                                                                                                                                                                                            | cross-sectional          | 197    | NA   | not reported  | gas stove and CO, NO and NO2 concentrations                              | no gas stove                                                         | asthma and bronchitis                                                | high     |
| <b>Wu et al<sup>446</sup></b>           | 2020 | China                                                                                                                                                                                                                            | cross-sectional          | 2673   | 49   | not reported  | Coal, Wood, Natural gas, Electricity, Coal Gas, Compressed petroleum gas | NA                                                                   | pneumonia                                                            | high     |
| <b>Wu-Williams et al<sup>447</sup></b>  | 1990 | China                                                                                                                                                                                                                            | case-control             | 850    | 0    | not reported  | kang stove, coal stove, coal burners, central heating                    | no kang stove, coal stove, coal burners, central heating             | lung cancer                                                          | low      |
| <b>Wylie et al<sup>448</sup></b>        | 2015 | India                                                                                                                                                                                                                            | cross-sectional          | 1744   | 0    | not reported  | wood                                                                     | LPG                                                                  | stillbirth, birth weight and low birth weight                        | low      |
| <b>Xu et al<sup>449</sup></b>           | 1989 | China                                                                                                                                                                                                                            | case-control             | 2594   | 58.5 | 57.8          | kang stove, coal stove, gas central heating, gas fuel for cooking        | no kang stove, coal stove, gas central heating, gas fuel for cooking | lung cancer                                                          | high     |
| <b>Xu et al<sup>450</sup></b>           | 1993 | China                                                                                                                                                                                                                            | cross-sectional          | 1576   | 75.1 | not reported  | coal                                                                     | no coal                                                              | asthma, bronchitis, respiratory symptoms                             | high     |
| <b>Xu et al<sup>451</sup></b>           | 1996 | China                                                                                                                                                                                                                            | cross-sectional          | 28946  | 43   | not reported  | coal                                                                     | no coal                                                              | wheeze and asthma                                                    | high     |
| <b>Yang et al<sup>452</sup></b>         | 1997 | Taiwan                                                                                                                                                                                                                           | cross-sectional          | 4164   | 48.9 | 10.4          | gas                                                                      | no exposure to gas                                                   | asthma, cough, wheeze, bronchitis, allergic rhinitis                 | high     |
| <b>Yang et al<sup>453</sup></b>         | 2014 | China                                                                                                                                                                                                                            | case-control             | 6246   | 66.3 | not reported  | biomass                                                                  | no biomass                                                           | COPD and lung cancer                                                 | high     |
| <b>Yu et al<sup>454</sup></b>           | 2017 | Hong Kong                                                                                                                                                                                                                        | prospective cohort study | 543    | 51.9 | under 1.5     | gas                                                                      | electricity                                                          | wheeze                                                               | high     |
| <b>Yu et al<sup>455</sup></b>           | 2020 | China                                                                                                                                                                                                                            | prospective cohort study | 171677 | 29.3 | 30-79         | solid fuel                                                               | clean fuel                                                           | All-cause mortality, cardiovascular mortality, respiratory mortality | high     |
| <b>Yucra et al<sup>456</sup></b>        | 2011 | Peru                                                                                                                                                                                                                             | case-control             | 190    | NA   | 27.1          | wood, peat/champa, charcoal or dung                                      | gas propane, electricity, kerosene                                   | low birth weight                                                     | moderate |
| <b>Yusuf et al<sup>457</sup></b>        | 2020 | Canada, Saudi Arabia, Sweden, and United Arab Emirates, Argentina, Brazil, Chile, China, Colombia, Iran, Malaysia, Palestine, Philippines, Poland, Turkey, and South Africa, Bangladesh, India, Pakistan, Tanzania, and Zimbabwe | prospective cohort study | 155722 | 41.7 | 50.2          | kerosene/solid fuel                                                      | clean fuel                                                           | cardiovascular disease, all-cause death                              | low      |

|                                           |      |         |                            |       |       |              |                                                          |                          |                      |      |
|-------------------------------------------|------|---------|----------------------------|-------|-------|--------------|----------------------------------------------------------|--------------------------|----------------------|------|
| <b>Zacharasiewicz et al<sup>458</sup></b> | 1999 | Austria | retrospective cohort study | 28747 | 51.13 | 7.2          | not electric                                             | electric                 | wheeze               | high |
| <b>Zejda et al<sup>459</sup></b>          | 2003 | Poland  | prospective cohort study   | 663   | 49.3  | 7-9          | coal                                                     | no coal                  | asthma               | high |
| <b>Zha et al<sup>460</sup></b>            | 2019 | China   | cross-sectional study      | 2770  | 49.2  | 53.8         | coal/biomass                                             | no coal/biomass          | COPD                 | low  |
| <b>Zhang et al<sup>461</sup></b>          | 1988 | China   | prospective cohort study   | 957   | 100   | not reported | coal                                                     | no coal                  | stroke mortality     | low  |
| <b>Zhang et al<sup>462</sup></b>          | 2002 | China   | cross-sectional            | 22528 | 48.7  | not reported | coal, wood, cornstalk                                    | no coal, wood, cornstalk | respiratory symptoms | high |
| <b>Zhao et al<sup>463</sup></b>           | 2009 | China   | case-control               | 206   | 0     | 62.1         | coal or wood                                             | no coal or wood          | chronic bronchitis   | high |
| <b>Zheng et al<sup>464</sup></b>          | 2002 | China   | cross-sectional            | 1209  | 58.7  | 6-10         | LPG, coal                                                | electricity              | asthma               | high |
| <b>Zheng et al<sup>465</sup></b>          | 2013 | China   | cross-sectional            | 4014  | 51.2  | 5.0          | coal or natural gas                                      | electricity              | pneumonia            | high |
| <b>Zhong et al<sup>466</sup></b>          | 1999 | China   | case-control               | 1105  | 0     | 35 to 69     | coal, gas                                                | coal                     | lung cancer          | low  |
| <b>Zhong et al<sup>467</sup></b>          | 2007 | China   | cross-sectional            | 20245 | 43    | over 40      | biomass                                                  | no exposure to biomass   | COPD                 | low  |
| <b>Zhou et al<sup>468</sup></b>           | 1994 | China   | cross-sectional            | 624   | NA    | under 3      | gas                                                      | coal                     | pneumonia            | high |
| <b>Zhou et al<sup>469</sup></b>           | 1995 | China   | cross-sectional            | 10892 | 48.3  | not reported | smoky coal and smokeless coal                            | wood                     | COPD                 | high |
| <b>Zhou et al<sup>470</sup></b>           | 2009 | China   | cross-sectional            | 12471 | 17.9  | over 40      | wood, charcoal, grass and crop residues or dung, or coal | no biomass               | COPD                 | low  |
| <b>Zhou et al<sup>471</sup></b>           | 2013 | France  | prospective cohort study   | 1765  | 52    | under 1      | wood                                                     | no wood                  | bronchiolitis        | high |
| <b>Zhou et al<sup>472</sup></b>           | 2014 | China   | prospective cohort study   | 682   | 45.6  | 54.4         | clean fuel                                               | biomass                  | COPD                 | low  |

**Table S4: Trends in cause-specific burden of disease attributable to household air pollution from 2000-2017**  
(DALYs in thousands [95% CI])

| Year | Atherosclerotic cardiovascular disease | Lung cancer        | Chronic respiratory disease | Communicable respiratory disease |
|------|----------------------------------------|--------------------|-----------------------------|----------------------------------|
| 2000 | 9312 [5394 - 14090]                    | 4361 [2516 - 6441] | 20614 [12581 - 30158]       | 52456 [33818 - 73140]            |
| 2001 | 9259 [5381 - 13945]                    | 4388 [2576 - 6457] | 20127 [12338 - 29429]       | 50490 [32451 - 70419]            |
| 2002 | 9308 [5469 - 13969]                    | 4438 [2603 - 6536] | 19813 [12254 - 28723]       | 48562 [31380 - 67779]            |
| 2003 | 9193 [5345 - 13862]                    | 4429 [2587 - 6507] | 19235 [11749 - 27913]       | 46463 [29818 - 64933]            |
| 2004 | 9205 [5398 - 13824]                    | 4493 [2663 - 6610] | 18783 [11670 - 27307]       | 44867 [28947 - 62690]            |
| 2005 | 9175 [5312 - 13877]                    | 4491 [2622 - 6672] | 18317 [11259 - 26612]       | 43158 [27627 - 60481]            |
| 2006 | 9021 [5262 - 13647]                    | 4452 [2577 - 6600] | 17914 [10955 - 26149]       | 41559 [26657 - 58376]            |
| 2007 | 9202 [5322 - 13893]                    | 4589 [2675 - 6822] | 18183 [11149 - 26357]       | 40328 [25879 - 56639]            |
| 2008 | 9195 [5368 - 13926]                    | 4596 [2678 - 6906] | 18138 [11179 - 26436]       | 38724 [24679 - 54668]            |
| 2009 | 9264 [5307 - 14195]                    | 4683 [2626 - 7126] | 18204 [11001 - 26715]       | 37184 [23545 - 52883]            |
| 2010 | 9307 [5371 - 14280]                    | 4765 [2664 - 7247] | 18248 [11080 - 26732]       | 35791 [22619 - 50917]            |
| 2011 | 9439 [5374 - 14589]                    | 4850 [2683 - 7398] | 18338 [11034 - 27014]       | 34801 [21833 - 49709]            |
| 2012 | 9402 [5219 - 14755]                    | 4915 [2638 - 7666] | 18102 [10750 - 26791]       | 33488 [20815 - 48195]            |
| 2013 | 9487 [5236 - 14868]                    | 5091 [2693 - 7930] | 18170 [10678 - 27045]       | 32266 [19950 - 46651]            |
| 2014 | 9480 [5057 - 15149]                    | 5192 [2663 - 8182] | 18248 [10537 - 27260]       | 31072 [19006 - 45322]            |
| 2015 | 9444 [4955 - 15280]                    | 5329 [2589 - 8577] | 18126 [10303 - 27428]       | 29717 [18037 - 43755]            |
| 2016 | 9549 [4933 - 15604]                    | 5567 [2767 - 8936] | 18260 [10247 - 27684]       | 28497 [17158 - 42328]            |
| 2017 | 9539 [4979 - 15570]                    | 5535 [2762 - 8965] | 18390 [10430 - 27815]       | 27420 [16382 - 40988]            |

**Table S5: Trends in burden of disease attributable to household air pollution stratified by 2018 World Bank income groups from 2000-2017**

(DALYs in thousands [95% CI])

| Year | Low income            | Lower middle income   | Upper middle income  | High income    |
|------|-----------------------|-----------------------|----------------------|----------------|
| 2000 | 16260 [10820 - 22524] | 51536 [33940 - 71133] | 18806 [9513 - 29769] | 142 [35 - 403] |
| 2001 | 16052 [10657 - 22206] | 50096 [32847 - 69290] | 17977 [9206 - 28363] | 139 [36 - 392] |
| 2002 | 15745 [10449 - 21819] | 48891 [32248 - 67518] | 17350 [8975 - 27291] | 136 [36 - 379] |
| 2003 | 15625 [10400 - 21627] | 47001 [30601 - 65041] | 16565 [8464 - 26183] | 130 [33 - 365] |
| 2004 | 15355 [10226 - 21255] | 45723 [29936 - 63353] | 16145 [8486 - 25462] | 124 [30 - 363] |
| 2005 | 15112 [10046 - 20912] | 44458 [28824 - 61731] | 15467 [7928 - 24653] | 104 [22 - 345] |
| 2006 | 14950 [9942 - 20716]  | 43531 [28254 - 60562] | 14361 [7232 - 23155] | 103 [22 - 338] |
| 2007 | 14778 [9842 - 20464]  | 43109 [27923 - 59971] | 14316 [7240 - 22934] | 101 [19 - 342] |
| 2008 | 14552 [9633 - 20204]  | 42131 [27148 - 58868] | 13878 [7106 - 22532] | 93 [16 - 332]  |
| 2009 | 14375 [9502 - 20013]  | 40963 [26274 - 57551] | 13905 [6687 - 23016] | 93 [15 - 337]  |
| 2010 | 14176 [9324 - 19784]  | 40124 [25692 - 56392] | 13720 [6704 - 22662] | 90 [14 - 337]  |
| 2011 | 13999 [9198 - 19546]  | 39765 [25249 - 56201] | 13578 [6466 - 22625] | 87 [12 - 339]  |
| 2012 | 13835 [9037 - 19374]  | 38731 [24308 - 55067] | 13253 [6066 - 22614] | 88 [11 - 352]  |
| 2013 | 13669 [8927 - 19166]  | 37824 [23642 - 54119] | 13432 [5976 - 22849] | 90 [11 - 359]  |
| 2014 | 13506 [8787 - 19029]  | 37193 [22867 - 53580] | 13206 [5600 - 22942] | 88 [10 - 363]  |
| 2015 | 13353 [8635 - 18867]  | 35943 [22061 - 52243] | 13234 [5180 - 23559] | 87 [8 - 371]   |
| 2016 | 13114 [8458 - 18628]  | 34976 [21106 - 51460] | 13694 [5533 - 24086] | 89 [8 - 378]   |
| 2017 | 12966 [8337 - 18438]  | 34397 [20671 - 50815] | 13430 [5537 - 23688] | 91 [7 - 397]   |

**Table S6: Trends in burden of disease attributable to household air pollution stratified by WHO regions from 2000-2017**  
(DALYs in thousands [95% CI])

| Year | African region        | Region of the Americas | South-East Asia region | European region   | Eastern Mediterranean region | Western Pacific region |
|------|-----------------------|------------------------|------------------------|-------------------|------------------------------|------------------------|
| 2000 | 23506 [15657 - 32475] | 1636 [951 - 2612]      | 36011 [23560 - 49616]  | 1946 [731 - 3959] | 5704 [3628 - 8335]           | 17942 [9781 - 26834]   |
| 2001 | 23222 [15438 - 32036] | 1588 [906 - 2519]      | 34875 [22688 - 48182]  | 1729 [651 - 3654] | 5494 [3499 - 8023]           | 17356 [9565 - 25836]   |
| 2002 | 22867 [15201 - 31643] | 1489 [845 - 2425]      | 33925 [22208 - 46740]  | 1627 [622 - 3431] | 5332 [3426 - 7751]           | 16881 [9405 - 25017]   |
| 2003 | 22552 [14965 - 31247] | 1445 [823 - 2352]      | 32284 [20773 - 44612]  | 1532 [581 - 3193] | 5291 [3420 - 7643]           | 16216 [8936 - 24169]   |
| 2004 | 22159 [14733 - 30638] | 1358 [764 - 2251]      | 31278 [20272 - 43319]  | 1412 [521 - 3016] | 5167 [3344 - 7491]           | 15976 [9045 - 23718]   |
| 2005 | 21760 [14420 - 30162] | 1298 [732 - 2159]      | 30314 [19383 - 42070]  | 1329 [465 - 2923] | 5043 [3268 - 7247]           | 15398 [8551 - 23081]   |
| 2006 | 21635 [14430 - 29938] | 1254 [707 - 2094]      | 29512 [18813 - 41124]  | 1215 [430 - 2651] | 4894 [3181 - 7060]           | 14435 [7891 - 21904]   |
| 2007 | 21369 [14290 - 29510] | 1198 [656 - 2064]      | 29368 [18659 - 41000]  | 1156 [402 - 2546] | 4703 [3057 - 6753]           | 14510 [7960 - 21839]   |
| 2008 | 20893 [13887 - 28944] | 1167 [640 - 2004]      | 28710 [18131 - 40247]  | 979 [329 - 2372]  | 4650 [3016 - 6711]           | 14254 [7901 - 21657]   |
| 2009 | 20590 [13668 - 28585] | 1153 [624 - 1999]      | 27820 [17456 - 39255]  | 918 [295 - 2298]  | 4439 [2875 - 6472]           | 14415 [7561 - 22311]   |
| 2010 | 20211 [13387 - 28094] | 1090 [582 - 1926]      | 27295 [17117 - 38497]  | 843 [262 - 2132]  | 4333 [2776 - 6336]           | 14337 [7609 - 22191]   |
| 2011 | 19891 [13160 - 27680] | 1064 [564 - 1889]      | 27244 [16896 - 38673]  | 774 [224 - 2017]  | 4190 [2683 - 6148]           | 14266 [7397 - 22302]   |
| 2012 | 19650 [12919 - 27416] | 1012 [525 - 1866]      | 26392 [16144 - 37673]  | 738 [197 - 1979]  | 4082 [2582 - 6073]           | 14032 [7056 - 22400]   |
| 2013 | 19332 [12679 - 27007] | 991 [512 - 1829]       | 25787 [15748 - 37086]  | 707 [185 - 1919]  | 3949 [2467 - 5919]           | 14248 [6966 - 22733]   |
| 2014 | 19091 [12479 - 26787] | 967 [492 - 1810]       | 25292 [15100 - 36679]  | 662 [168 - 1860]  | 3900 [2401 - 5894]           | 14081 [6623 - 22884]   |
| 2015 | 18884 [12282 - 26661] | 956 [483 - 1796]       | 24293 [14522 - 35449]  | 645 [155 - 1852]  | 3752 [2278 - 5755]           | 14087 [6165 - 23527]   |
| 2016 | 18677 [12088 - 26539] | 938 [466 - 1789]       | 23519 [13757 - 34748]  | 584 [117 - 1847]  | 3598 [2162 - 5566]           | 14555 [6515 - 24063]   |
| 2017 | 18348 [11797 - 26152] | 946 [466 - 1830]       | 23282 [13665 - 34413]  | 558 [103 - 1810]  | 3532 [2077 - 5529]           | 14218 [6445 - 23604]   |

**Table S7: Country-level estimates of burden of disease and deaths attributable to household air pollution in 2017**

| Country                                 | DALYs<br>(in thousands, [95% CI]) | Age-standardized DALYs (per<br>100,000, [95% CI]) | Deaths<br>(in thousands, [95% CI]) | Age-standardized Deaths (per<br>100,000, [95% CI]) |
|-----------------------------------------|-----------------------------------|---------------------------------------------------|------------------------------------|----------------------------------------------------|
| <b>Afghanistan</b>                      | 561 [373 - 799]                   | 2121 [1413 - 3003]                                | 18.5 [12.3 - 26.3]                 | 45 [27 - 66]                                       |
| <b>Albania</b>                          | 10 [2 - 23]                       | 267 [61 - 611]                                    | 0.3 [0.1 - 0.7]                    | 6 [1 - 16]                                         |
| <b>Algeria</b>                          | 167 [0 - 347]                     | 482 [1 - 998]                                     | 5 [0 - 11.9]                       | 12 [0 - 29]                                        |
| <b>Andorra</b>                          | 0 [0 - 0]                         | 0 [0 - 0]                                         | 0 [0 - 0]                          | 0 [0 - 0]                                          |
| <b>Angola</b>                           | 282 [165 - 428]                   | 1362 [795 - 2040]                                 | 10.9 [7.1 - 15.8]                  | 28 [19 - 40]                                       |
| <b>Antigua and Barbuda</b>              | 0 [0 - 0]                         | 12 [1 - 50]                                       | 0 [0 - 0]                          | 0 [0 - 1]                                          |
| <b>Argentina</b>                        | 11 [1 - 48]                       | 21 [2 - 93]                                       | 0.3 [0 - 1.2]                      | 0 [0 - 2]                                          |
| <b>Armenia</b>                          | 2 [0 - 8]                         | 41 [2 - 200]                                      | 0 [0 - 0.2]                        | 1 [0 - 4]                                          |
| <b>Australia</b>                        | 0 [0 - 0]                         | 0 [0 - 0]                                         | 0 [0 - 0]                          | 0 [0 - 0]                                          |
| <b>Austria</b>                          | 0 [0 - 0]                         | 0 [0 - 0]                                         | 0 [0 - 0]                          | 0 [0 - 0]                                          |
| <b>Azerbaijan</b>                       | 6 [0 - 27]                        | 63 [3 - 312]                                      | 0.1 [0 - 0.6]                      | 1 [0 - 6]                                          |
| <b>Bahamas</b>                          | 0 [0 - 0]                         | 0 [0 - 0]                                         | 0 [0 - 0]                          | 0 [0 - 0]                                          |
| <b>Bahrain</b>                          | 0 [0 - 0]                         | 0 [0 - 0]                                         | 0 [0 - 0]                          | 0 [0 - 0]                                          |
| <b>Bangladesh</b>                       | 2048 [1423 - 2732]                | 1590 [1106 - 2126]                                | 54.7 [37.9 - 73.6]                 | 33 [23 - 45]                                       |
| <b>Barbados</b>                         | 0 [0 - 0]                         | 8 [1 - 28]                                        | 0 [0 - 0]                          | 0 [0 - 1]                                          |
| <b>Belarus</b>                          | 13 [0 - 69]                       | 83 [2 - 451]                                      | 0.4 [0 - 2.1]                      | 2 [0 - 13]                                         |
| <b>Belgium</b>                          | 0 [0 - 0]                         | 0 [0 - 0]                                         | 0 [0 - 0]                          | 0 [0 - 0]                                          |
| <b>Belize</b>                           | 1 [0 - 1]                         | 177 [85 - 315]                                    | 0 [0 - 0]                          | 3 [2 - 6]                                          |
| <b>Benin</b>                            | 190 [126 - 270]                   | 2087 [1394 - 2891]                                | 8.7 [6.1 - 11.9]                   | 45 [33 - 60]                                       |
| <b>Bhutan</b>                           | 3 [1 - 6]                         | 393 [114 - 862]                                   | 0.1 [0 - 0.1]                      | 8 [2 - 18]                                         |
| <b>Bolivia (Plurinational State of)</b> | 28 [14 - 48]                      | 279 [143 - 480]                                   | 0.8 [0.4 - 1.4]                    | 6 [3 - 10]                                         |
| <b>Bosnia and Herzegovina</b>           | 28 [15 - 45]                      | 499 [257 - 802]                                   | 0.7 [0.3 - 1.2]                    | 12 [6 - 21]                                        |
| <b>Botswana</b>                         | 14 [7 - 22]                       | 877 [452 - 1392]                                  | 0.3 [0.2 - 0.5]                    | 18 [9 - 29]                                        |
| <b>Brazil</b>                           | 137 [30 - 382]                    | 63 [14 - 175]                                     | 3.1 [0.7 - 8.7]                    | 1 [0 - 3]                                          |
| <b>Brunei Darussalam</b>                | 0 [0 - 0]                         | 0 [0 - 0]                                         | 0 [0 - 0]                          | 0 [0 - 0]                                          |
| <b>Bulgaria</b>                         | 15 [0 - 80]                       | 118 [2 - 616]                                     | 0.4 [0 - 2.3]                      | 3 [0 - 15]                                         |

|                                              |                      |                    |                       |                |
|----------------------------------------------|----------------------|--------------------|-----------------------|----------------|
| <b>Burkina Faso</b>                          | 474 [314 - 669]      | 2390 [1600 - 3260] | 21.1 [15 - 28.7]      | 48 [36 - 61]   |
| <b>Burundi</b>                               | 258 [158 - 372]      | 3177 [1913 - 4568] | 9.5 [6.8 - 12.7]      | 73 [54 - 94]   |
| <b>Cabo Verde</b>                            | 2 [1 - 4]            | 454 [198 - 782]    | 0.1 [0 - 0.1]         | 10 [4 - 19]    |
| <b>Cambodia</b>                              | 230 [156 - 313]      | 1771 [1202 - 2389] | 5.7 [4 - 7.7]         | 39 [28 - 51]   |
| <b>Cameroon</b>                              | 360 [229 - 522]      | 1889 [1198 - 2714] | 13.9 [9.5 - 19.4]     | 42 [29 - 58]   |
| <b>Canada</b>                                | 0 [0 - 0]            | 0 [0 - 0]          | 0 [0 - 0]             | 0 [0 - 0]      |
| <b>Central African Republic</b>              | 191 [110 - 287]      | 5152 [3038 - 7584] | 6.9 [4.8 - 9.7]       | 103 [75 - 139] |
| <b>Chad</b>                                  | 524 [358 - 719]      | 3285 [2196 - 4457] | 20.9 [15.4 - 27.5]    | 64 [48 - 81]   |
| <b>Chile</b>                                 | 13 [2 - 39]          | 57 [9 - 179]       | 0.3 [0 - 1]           | 1 [0 - 4]      |
| <b>China</b>                                 | 11699 [4974 - 19608] | 649 [274 - 1089]   | 267.9 [103.6 - 477.8] | 15 [6 - 27]    |
| <b>Colombia</b>                              | 28 [5 - 83]          | 55 [10 - 160]      | 0.7 [0.1 - 2]         | 1 [0 - 3]      |
| <b>Comoros</b>                               | 10 [6 - 14]          | 1779 [1136 - 2523] | 0.3 [0.2 - 0.4]       | 42 [29 - 57]   |
| <b>Congo</b>                                 | 62 [36 - 92]         | 1852 [1109 - 2721] | 2 [1.3 - 2.9]         | 44 [29 - 62]   |
| <b>Costa Rica</b>                            | 2 [0 - 6]            | 45 [8 - 132]       | 0 [0 - 0.1]           | 1 [0 - 3]      |
| <b>Cote d'Ivoire</b>                         | 392 [244 - 569]      | 2023 [1267 - 2894] | 15.5 [10.3 - 21.5]    | 44 [29 - 61]   |
| <b>Croatia</b>                               | 7 [1 - 21]           | 85 [13 - 261]      | 0.2 [0 - 0.5]         | 2 [0 - 6]      |
| <b>Cuba</b>                                  | 47 [0 - 164]         | 276 [1 - 950]      | 1.1 [0 - 4.6]         | 6 [0 - 23]     |
| <b>Cyprus</b>                                | 0 [0 - 0]            | 0 [0 - 0]          | 0 [0 - 0]             | 0 [0 - 0]      |
| <b>Czechia</b>                               | 5 [0 - 22]           | 24 [1 - 114]       | 0.1 [0 - 0.5]         | 0 [0 - 2]      |
| <b>Democratic People's Republic of Korea</b> | 646 [424 - 891]      | 2268 [1491 - 3130] | 14.7 [9.3 - 20.9]     | 49 [31 - 70]   |
| <b>Democratic Republic of the Congo</b>      | 1923 [1206 - 2779]   | 2977 [1850 - 4324] | 73.3 [52 - 99.8]      | 66 [45 - 91]   |
| <b>Denmark</b>                               | 0 [0 - 0]            | 0 [0 - 0]          | 0 [0 - 0]             | 0 [0 - 0]      |
| <b>Djibouti</b>                              | 13 [7 - 21]          | 1592 [909 - 2504]  | 0.4 [0.2 - 0.6]       | 37 [23 - 57]   |
| <b>Dominica</b>                              | 0 [0 - 0]            | 109 [25 - 280]     | 0 [0 - 0]             | 2 [0 - 5]      |
| <b>Dominican Republic</b>                    | 11 [5 - 23]          | 120 [49 - 244]     | 0.4 [0.1 - 0.7]       | 3 [1 - 5]      |
| <b>Ecuador</b>                               | 3 [0 - 15]           | 21 [1 - 99]        | 0.1 [0 - 0.4]         | 0 [0 - 2]      |
| <b>Egypt</b>                                 | 18 [2 - 71]          | 25 [2 - 98]        | 0.4 [0 - 1.5]         | 1 [0 - 2]      |
| <b>El Salvador</b>                           | 8 [3 - 15]           | 132 [55 - 258]     | 0.2 [0.1 - 0.4]       | 3 [1 - 6]      |
| <b>Equatorial Guinea</b>                     | 9 [4 - 16]           | 1238 [464 - 2074]  | 0.4 [0.2 - 0.7]       | 29 [11 - 48]   |



|                                   |                       |                    |                     |              |
|-----------------------------------|-----------------------|--------------------|---------------------|--------------|
| <b>Eritrea</b>                    | 125 [63 - 197]        | 2995 [1524 - 4574] | 3.6 [2 - 5.3]       | 65 [38 - 93] |
| <b>Estonia</b>                    | 1 [0 - 6]             | 51 [1 - 270]       | 0 [0 - 0.2]         | 1 [0 - 6]    |
| <b>Ethiopia</b>                   | 1411 [951 - 1886]     | 1798 [1173 - 2411] | 56.7 [43 - 71.4]    | 40 [31 - 50] |
| <b>Fiji</b>                       | 8 [3 - 14]            | 1083 [351 - 1770]  | 0.2 [0.1 - 0.4]     | 25 [7 - 44]  |
| <b>Finland</b>                    | 0 [0 - 0]             | 0 [0 - 0]          | 0 [0 - 0]           | 0 [0 - 0]    |
| <b>France</b>                     | 0 [0 - 0]             | 0 [0 - 0]          | 0 [0 - 0]           | 0 [0 - 0]    |
| <b>Gabon</b>                      | 8 [2 - 18]            | 626 [129 - 1413]   | 0.3 [0 - 0.6]       | 13 [3 - 31]  |
| <b>Gambia</b>                     | 31 [20 - 43]          | 2181 [1477 - 2977] | 1.1 [0.8 - 1.6]     | 54 [38 - 72] |
| <b>Georgia</b>                    | 19 [6 - 38]           | 342 [118 - 694]    | 0.5 [0.2 - 1.2]     | 9 [3 - 19]   |
| <b>Germany</b>                    | 0 [0 - 0]             | 0 [0 - 0]          | 0 [0 - 0]           | 0 [0 - 0]    |
| <b>Ghana</b>                      | 332 [217 - 465]       | 1624 [1061 - 2256] | 12.4 [8.6 - 16.9]   | 39 [28 - 52] |
| <b>Greece</b>                     | 3 [0 - 14]            | 16 [1 - 66]        | 0.1 [0 - 0.3]       | 0 [0 - 1]    |
| <b>Grenada</b>                    | 0 [0 - 0]             | 26 [1 - 123]       | 0 [0 - 0]           | 1 [0 - 3]    |
| <b>Guatemala</b>                  | 122 [85 - 168]        | 833 [584 - 1123]   | 3.2 [2.2 - 4.6]     | 16 [11 - 21] |
| <b>Guinea</b>                     | 320 [216 - 441]       | 3139 [2092 - 4298] | 12.3 [8.8 - 16.3]   | 68 [50 - 89] |
| <b>Guinea-Bissau</b>              | 35 [23 - 49]          | 2878 [1876 - 3954] | 1.5 [1.1 - 2]       | 70 [51 - 91] |
| <b>Guyana</b>                     | 2 [1 - 4]             | 341 [140 - 643]    | 0.1 [0 - 0.1]       | 8 [3 - 16]   |
| <b>Haiti</b>                      | 191 [128 - 269]       | 2016 [1380 - 2778] | 6.6 [4.5 - 9.2]     | 45 [29 - 64] |
| <b>Honduras</b>                   | 35 [20 - 54]          | 516 [302 - 784]    | 1 [0.6 - 1.6]       | 12 [6 - 19]  |
| <b>Hungary</b>                    | 0 [0 - 0]             | 0 [0 - 0]          | 0 [0 - 0]           | 0 [0 - 0]    |
| <b>Iceland</b>                    | 0 [0 - 0]             | 0 [0 - 0]          | 0 [0 - 0]           | 0 [0 - 0]    |
| <b>India</b>                      | 17264 [10041 - 25482] | 1552 [901 - 2272]  | 422.5 [250.7 - 614] | 32 [19 - 47] |
| <b>Indonesia</b>                  | 1598 [716 - 2768]     | 741 [335 - 1272]   | 39.5 [18.1 - 67.4]  | 17 [8 - 30]  |
| <b>Iran (Islamic Republic of)</b> | 10 [1 - 41]           | 14 [1 - 57]        | 0.3 [0 - 1.1]       | 0 [0 - 1]    |
| <b>Iraq</b>                       | 5 [0 - 21]            | 15 [1 - 68]        | 0.2 [0 - 0.7]       | 0 [0 - 1]    |
| <b>Ireland</b>                    | 0 [0 - 0]             | 0 [0 - 0]          | 0 [0 - 0]           | 0 [0 - 0]    |
| <b>Israel</b>                     | 0 [0 - 0]             | 0 [0 - 0]          | 0 [0 - 0]           | 0 [0 - 0]    |
| <b>Italy</b>                      | 0 [0 - 0]             | 0 [0 - 0]          | 0 [0 - 0]           | 0 [0 - 0]    |
| <b>Jamaica</b>                    | 3 [1 - 6]             | 93 [33 - 204]      | 0.1 [0 - 0.1]       | 2 [1 - 4]    |

|                                         |                  |                    |                    |              |
|-----------------------------------------|------------------|--------------------|--------------------|--------------|
| <b>Japan</b>                            | 0 [0 - 0]        | 0 [0 - 0]          | 0 [0 - 0]          | 0 [0 - 0]    |
| <b>Jordan</b>                           | 0 [0 - 2]        | 7 [1 - 23]         | 0 [0 - 0]          | 0 [0 - 0]    |
| <b>Kazakhstan</b>                       | 8 [0 - 41]       | 49 [2 - 243]       | 0.2 [0 - 1]        | 1 [0 - 6]    |
| <b>Kenya</b>                            | 590 [394 - 796]  | 1725 [1135 - 2337] | 18.6 [13.8 - 23.7] | 38 [28 - 49] |
| <b>Kiribati</b>                         | 2 [1 - 3]        | 2578 [1564 - 3599] | 0.1 [0 - 0.1]      | 60 [40 - 81] |
| <b>Kuwait</b>                           | 0 [0 - 0]        | 0 [0 - 0]          | 0 [0 - 0]          | 0 [0 - 0]    |
| <b>Kyrgyzstan</b>                       | 14 [3 - 37]      | 291 [54 - 750]     | 0.4 [0.1 - 1.1]    | 7 [1 - 19]   |
| <b>Lao People's Democratic Republic</b> | 145 [95 - 203]   | 2566 [1705 - 3541] | 4 [2.7 - 5.6]      | 51 [34 - 71] |
| <b>Latvia</b>                           | 4 [0 - 14]       | 116 [13 - 382]     | 0.1 [0 - 0.4]      | 3 [0 - 10]   |
| <b>Lesotho</b>                          | 44 [24 - 67]     | 2891 [1659 - 4357] | 1.1 [0.7 - 1.5]    | 57 [36 - 81] |
| <b>Liberia</b>                          | 67 [43 - 95]     | 1996 [1308 - 2752] | 3 [2.1 - 4.1]      | 47 [34 - 62] |
| <b>Lithuania</b>                        | 0 [0 - 0]        | 0 [0 - 0]          | 0 [0 - 0]          | 0 [0 - 0]    |
| <b>Luxembourg</b>                       | 0 [0 - 0]        | 0 [0 - 0]          | 0 [0 - 0]          | 0 [0 - 0]    |
| <b>Madagascar</b>                       | 576 [384 - 807]  | 2684 [1840 - 3627] | 20.8 [14.4 - 29]   | 56 [40 - 75] |
| <b>Malawi</b>                           | 272 [174 - 380]  | 2077 [1347 - 2860] | 11.4 [8.2 - 15.2]  | 46 [34 - 60] |
| <b>Malaysia</b>                         | 60 [1 - 288]     | 234 [2 - 1106]     | 1.3 [0 - 6.8]      | 5 [0 - 29]   |
| <b>Maldives</b>                         | 0 [0 - 1]        | 54 [1 - 285]       | 0 [0 - 0]          | 1 [0 - 6]    |
| <b>Mali</b>                             | 372 [248 - 532]  | 2030 [1362 - 2825] | 24.5 [17.3 - 33.3] | 41 [28 - 56] |
| <b>Malta</b>                            | 0 [0 - 0]        | 0 [0 - 0]          | 0 [0 - 0]          | 0 [0 - 0]    |
| <b>Marshall Islands</b>                 | 0 [0 - 1]        | 1123 [412 - 2105]  | 0 [0 - 0]          | 24 [8 - 47]  |
| <b>Mauritania</b>                       | 29 [18 - 43]     | 1001 [631 - 1453]  | 1 [0.7 - 1.5]      | 22 [14 - 33] |
| <b>Mauritius</b>                        | 0 [0 - 2]        | 28 [1 - 138]       | 0 [0 - 0]          | 1 [0 - 3]    |
| <b>Mexico</b>                           | 171 [97 - 276]   | 149 [85 - 237]     | 4.2 [2.4 - 6.8]    | 3 [2 - 5]    |
| <b>Micronesia (Federated States of)</b> | 2 [1 - 2]        | 1918 [1291 - 2657] | 0 [0 - 0]          | 45 [28 - 63] |
| <b>Mongolia</b>                         | 34 [18 - 50]     | 1276 [675 - 1879]  | 0.9 [0.5 - 1.3]    | 31 [15 - 48] |
| <b>Montenegro</b>                       | 4 [2 - 8]        | 442 [178 - 801]    | 0.1 [0 - 0.2]      | 11 [4 - 22]  |
| <b>Morocco</b>                          | 9 [1 - 43]       | 29 [2 - 133]       | 0.2 [0 - 1.1]      | 1 [0 - 3]    |
| <b>Mozambique</b>                       | 513 [305 - 744]  | 2637 [1568 - 3743] | 21.6 [15.7 - 29]   | 61 [45 - 80] |
| <b>Myanmar</b>                          | 912 [584 - 1278] | 2056 [1330 - 2869] | 23 [15.5 - 31.8]   | 43 [29 - 59] |

|                                         |                    |                    |                       |               |
|-----------------------------------------|--------------------|--------------------|-----------------------|---------------|
| <b>Namibia</b>                          | 28 [15 - 43]       | 1606 [841 - 2390]  | 0.8 [0.4 - 1.2]       | 33 [18 - 48]  |
| <b>Nepal</b>                            | 392 [257 - 560]    | 1691 [1113 - 2395] | 9.5 [6.3 - 13.5]      | 35 [23 - 50]  |
| <b>Netherlands</b>                      | 0 [0 - 0]          | 0 [0 - 0]          | 0 [0 - 0]             | 0 [0 - 0]     |
| <b>New Zealand</b>                      | 0 [0 - 0]          | 0 [0 - 0]          | 0 [0 - 0]             | 0 [0 - 0]     |
| <b>Nicaragua</b>                        | 20 [13 - 28]       | 379 [253 - 526]    | 0.5 [0.4 - 0.8]       | 7 [5 - 11]    |
| <b>Niger</b>                            | 530 [350 - 765]    | 2501 [1632 - 3535] | 24.1 [17.2 - 32.6]    | 50 [35 - 68]  |
| <b>Nigeria</b>                          | 5018 [3391 - 7053] | 2201 [1458 - 3127] | 194.8 [139.3 - 262.7] | 37 [26 - 51]  |
| <b>Norway</b>                           | 0 [0 - 0]          | 0 [0 - 0]          | 0 [0 - 0]             | 0 [0 - 0]     |
| <b>Oman</b>                             | 2 [0 - 9]          | 67 [1 - 366]       | 0 [0 - 0.2]           | 2 [0 - 10]    |
| <b>Pakistan</b>                         | 2055 [1192 - 3135] | 1350 [796 - 2023]  | 70.2 [42.3 - 106.2]   | 29 [17 - 45]  |
| <b>Panama</b>                           | 4 [1 - 7]          | 94 [37 - 192]      | 0.1 [0 - 0.2]         | 2 [1 - 3]     |
| <b>Papua New Guinea</b>                 | 273 [180 - 384]    | 4632 [3108 - 6440] | 6.2 [4.1 - 8.8]       | 97 [65 - 134] |
| <b>Paraguay</b>                         | 20 [12 - 31]       | 359 [221 - 538]    | 0.5 [0.3 - 0.8]       | 8 [5 - 12]    |
| <b>Peru</b>                             | 80 [46 - 125]      | 248 [144 - 389]    | 2.1 [1.3 - 3.3]       | 5 [3 - 7]     |
| <b>Philippines</b>                      | 1223 [737 - 1779]  | 1510 [924 - 2174]  | 28.4 [17.8 - 40.6]    | 35 [22 - 49]  |
| <b>Poland</b>                           | 0 [0 - 0]          | 0 [0 - 0]          | 0 [0 - 0]             | 0 [0 - 0]     |
| <b>Portugal</b>                         | 0 [0 - 0]          | 0 [0 - 0]          | 0 [0 - 0]             | 0 [0 - 0]     |
| <b>Qatar</b>                            | 0 [0 - 1]          | 10 [1 - 40]        | 0 [0 - 0]             | 0 [0 - 1]     |
| <b>Republic of Korea</b>                | 25 [1 - 130]       | 31 [1 - 163]       | 0.5 [0 - 2.7]         | 1 [0 - 3]     |
| <b>Republic of Moldova</b>              | 6 [1 - 17]         | 112 [18 - 345]     | 0.1 [0 - 0.5]         | 2 [0 - 8]     |
| <b>Romania</b>                          | 76 [11 - 214]      | 245 [35 - 677]     | 1.9 [0.3 - 5.7]       | 5 [1 - 15]    |
| <b>Russian Federation</b>               | 72 [4 - 343]       | 33 [2 - 156]       | 1.8 [0.1 - 8.7]       | 1 [0 - 4]     |
| <b>Rwanda</b>                           | 188 [119 - 269]    | 1944 [1247 - 2715] | 6.3 [4.6 - 8.6]       | 43 [32 - 55]  |
| <b>Saint Lucia</b>                      | 0 [0 - 0]          | 20 [1 - 93]        | 0 [0 - 0]             | 0 [0 - 2]     |
| <b>Saint Vincent and the Grenadines</b> | 0 [0 - 0]          | 24 [1 - 113]       | 0 [0 - 0]             | 0 [0 - 2]     |
| <b>Samoa</b>                            | 2 [1 - 2]          | 1098 [732 - 1534]  | 0 [0 - 0.1]           | 27 [16 - 39]  |
| <b>Saudi Arabia</b>                     | 10 [0 - 53]        | 49 [1 - 262]       | 0.2 [0 - 1.1]         | 1 [0 - 7]     |
| <b>Senegal</b>                          | 166 [103 - 241]    | 1511 [942 - 2159]  | 5.8 [3.8 - 8.2]       | 34 [23 - 47]  |
| <b>Serbia</b>                           | 65 [18 - 134]      | 429 [114 - 896]    | 1.7 [0.4 - 4]         | 11 [3 - 25]   |

|                                                  |                 |                    |                    |               |
|--------------------------------------------------|-----------------|--------------------|--------------------|---------------|
| <b>Seychelles</b>                                | 0 [0 - 0]       | 54 [2 - 275]       | 0 [0 - 0]          | 1 [0 - 6]     |
| <b>Sierra Leone</b>                              | 195 [129 - 273] | 2981 [1978 - 4085] | 8.4 [6 - 11.4]     | 64 [47 - 82]  |
| <b>Singapore</b>                                 | 0 [0 - 0]       | 0 [0 - 0]          | 0 [0 - 0]          | 0 [0 - 0]     |
| <b>Slovakia</b>                                  | 2 [0 - 12]      | 29 [1 - 144]       | 0.1 [0 - 0.3]      | 1 [0 - 3]     |
| <b>Slovenia</b>                                  | 1 [0 - 6]       | 29 [1 - 145]       | 0 [0 - 0.1]        | 1 [0 - 3]     |
| <b>Solomon Islands</b>                           | 11 [8 - 15]     | 2697 [1927 - 3552] | 0.3 [0.2 - 0.4]    | 65 [45 - 87]  |
| <b>Somalia</b>                                   | 435 [254 - 677] | 3291 [1921 - 5056] | 16.4 [11.2 - 23.4] | 75 [50 - 106] |
| <b>South Africa</b>                              | 181 [74 - 351]  | 378 [156 - 731]    | 3.9 [1.7 - 7.2]    | 6 [3 - 12]    |
| <b>South Sudan</b>                               | 353 [230 - 508] | 3504 [2216 - 5085] | 12.8 [9 - 17.3]    | 65 [45 - 90]  |
| <b>Spain</b>                                     | 0 [0 - 0]       | 0 [0 - 0]          | 0 [0 - 0]          | 0 [0 - 0]     |
| <b>Sri Lanka</b>                                 | 165 [108 - 230] | 706 [464 - 978]    | 4.5 [2.9 - 6.5]    | 20 [13 - 28]  |
| <b>Sudan</b>                                     | 271 [167 - 412] | 950 [600 - 1407]   | 12.4 [7.6 - 18.9]  | 23 [13 - 36]  |
| <b>Suriname</b>                                  | 1 [0 - 2]       | 135 [41 - 311]     | 0 [0 - 0]          | 3 [1 - 6]     |
| <b>Swaziland</b>                                 | 13 [8 - 20]     | 1597 [940 - 2425]  | 0.3 [0.2 - 0.4]    | 30 [19 - 44]  |
| <b>Sweden</b>                                    | 0 [0 - 0]       | 0 [0 - 0]          | 0 [0 - 0]          | 0 [0 - 0]     |
| <b>Switzerland</b>                               | 0 [0 - 0]       | 0 [0 - 0]          | 0 [0 - 0]          | 0 [0 - 0]     |
| <b>Syrian Arab Republic</b>                      | 2 [0 - 9]       | 16 [1 - 64]        | 0.1 [0 - 0.2]      | 0 [0 - 2]     |
| <b>Tajikistan</b>                                | 38 [10 - 85]    | 444 [124 - 994]    | 0.9 [0.3 - 2.1]    | 8 [2 - 19]    |
| <b>Thailand</b>                                  | 235 [100 - 440] | 260 [112 - 486]    | 5 [2.1 - 9.3]      | 5 [2 - 9]     |
| <b>The former Yugoslav Republic of Macedonia</b> | 14 [7 - 23]     | 435 [212 - 727]    | 0.3 [0.1 - 0.6]    | 10 [4 - 17]   |
| <b>Timor-Leste</b>                               | 18 [12 - 26]    | 1782 [1157 - 2532] | 0.5 [0.4 - 0.7]    | 42 [27 - 60]  |
| <b>Togo</b>                                      | 103 [67 - 145]  | 1989 [1313 - 2746] | 4.1 [2.9 - 5.7]    | 47 [34 - 63]  |
| <b>Tonga</b>                                     | 1 [0 - 1]       | 822 [449 - 1271]   | 0 [0 - 0]          | 17 [9 - 27]   |
| <b>Trinidad and Tobago</b>                       | 0 [0 - 1]       | 11 [1 - 46]        | 0 [0 - 0]          | 0 [0 - 1]     |
| <b>Tunisia</b>                                   | 1 [0 - 3]       | 8 [1 - 27]         | 0 [0 - 0.1]        | 0 [0 - 1]     |
| <b>Turkey</b>                                    | 51 [14 - 134]   | 60 [16 - 154]      | 1 [0.3 - 2.5]      | 1 [0 - 2]     |
| <b>Turkmenistan</b>                              | 1 [0 - 3]       | 18 [2 - 70]        | 0 [0 - 0.1]        | 0 [0 - 2]     |
| <b>Uganda</b>                                    | 490 [308 - 695] | 1864 [1169 - 2616] | 23.7 [17.2 - 31.2] | 44 [32 - 57]  |
| <b>Ukraine</b>                                   | 45 [1 - 235]    | 66 [2 - 338]       | 1.3 [0 - 7.2]      | 2 [0 - 9]     |

|                                           |                  |                    |                    |              |
|-------------------------------------------|------------------|--------------------|--------------------|--------------|
| <b>United Arab Emirates</b>               | 2 [0 - 8]        | 32 [2 - 154]       | 0 [0 - 0.1]        | 1 [0 - 3]    |
| <b>United Kingdom</b>                     | 0 [0 - 0]        | 0 [0 - 0]          | 0 [0 - 0]          | 0 [0 - 0]    |
| <b>United Republic of Tanzania</b>        | 934 [605 - 1304] | 2022 [1331 - 2774] | 34.9 [24.9 - 47.2] | 43 [32 - 54] |
| <b>United States of America</b>           | 0 [0 - 0]        | 0 [0 - 0]          | 0 [0 - 0]          | 0 [0 - 0]    |
| <b>Uruguay</b>                            | 1 [0 - 5]        | 23 [1 - 105]       | 0 [0 - 0.1]        | 0 [0 - 2]    |
| <b>Uzbekistan</b>                         | 47 [6 - 149]     | 186 [25 - 586]     | 1.1 [0.1 - 3.6]    | 5 [1 - 16]   |
| <b>Vanuatu</b>                            | 5 [3 - 8]        | 2493 [1631 - 3624] | 0.1 [0.1 - 0.2]    | 57 [35 - 86] |
| <b>Venezuela (Bolivarian Republic of)</b> | 6 [0 - 30]       | 23 [1 - 107]       | 0.1 [0 - 0.7]      | 0 [0 - 2]    |
| <b>Viet Nam</b>                           | 498 [266 - 802]  | 552 [296 - 892]    | 11.1 [6 - 18]      | 12 [6 - 19]  |
| <b>Yemen</b>                              | 138 [80 - 223]   | 706 [412 - 1115]   | 5.7 [3.3 - 9.1]    | 17 [9 - 29]  |
| <b>Zambia</b>                             | 255 [157 - 369]  | 2012 [1265 - 2861] | 9.6 [6.6 - 13.3]   | 44 [32 - 58] |
| <b>Zimbabwe</b>                           | 311 [195 - 441]  | 2757 [1709 - 3912] | 7.8 [5.6 - 10.4]   | 54 [40 - 72] |

## References

1. Institute for Health Metrics and Evaluation. (2015) GBD results tool. <http://ghdx.healthdata.org/gbd-results-tool> [accessed on 14 May 2018].
2. Abusalah A, Gavana M, Haidich AB, et al. Low birth weight and prenatal exposure to indoor pollution from tobacco smoke and wood fuel smoke: a matched case-control study in Gaza Strip. *Matern Child Health J* 2012; **16**(8): 1718–27.
3. Acharya P, Mishra SR, Berg-Beckhoff G. Solid fuel in kitchen and acute respiratory tract infection among under five children: evidence from Nepal demographic and health survey 2011. *J Community Health* 2015; **40**(3): 515–21.
4. Adane MM, Alene GD, Mereta ST, Wanyonyi KL. Prevalence and risk factors of acute lower respiratory infection among children living in biomass fuel using households: a community-based cross-sectional study in Northwest Ethiopia. *BMC public health* 2020; **20**(1): 363.
5. Addo-Yobo EO, Custovic A, Taggart SC, Craven M, Bonnie B, Woodcock A. Risk factors for asthma in urban Ghana. *J Allergy Clin Immunol* 2001; **108**(3): 363–8.
6. Adesanya OA, Chiao C. A multilevel analysis of lifestyle variations in symptoms of acute respiratory infection among young children under five in Nigeria. *Bmc Public Health* 2016; **16**(880).
7. Adeyemi RA, Zewotir T, Ramroop S. Semiparametric Multinomial Ordinal Model to Analyze Spatial Patterns of Child Birth Weight in Nigeria. *International journal of environmental research and public health* 2016; **13**(11).
8. Admasie A, Kumie A, Worku A. Children under Five from Houses of Unclean Fuel Sources and Poorly Ventilated Houses Have Higher Odds of Suffering from Acute Respiratory Infection in Wolaita-Sodo, Southern Ethiopia: A Case-Control Study. *J Environ Public Health* 2018; **2018**(Journal Article): 9320603.
9. Aggarwal AN, Chaudhry K, Chhabra SK, et al. Prevalence and risk factors for bronchial asthma in Indian adults: a multicentre study. *Indian J Chest Dis Allied Sci* 2006; **48**(1): 13–22.
10. Agrawal S. Effect of indoor air pollution from biomass and solid fuel combustion on prevalence of self-reported asthma among adult men and women in India: findings from a nationwide large-scale cross-sectional survey. *J Asthma* 2012; **49**(4): 355–65.
11. Akhtar T, Ullah Z, Khan MH, Nazli R. Chronic bronchitis in women using solid biomass fuel in rural Peshawar, Pakistan. *Chest* 2007; **132**(5): 1472–5.
12. Akinyemi JO, Adedini SA, Wandera SO, Odimegwu CO. Independent and combined effects of maternal smoking and solid fuel on infant and child mortality in sub-Saharan Africa. *Trop Med Int Health* 2016; **21**(12): 1572–82.
13. Akinyemi JO, Morakinyo OM. Household environment and symptoms of childhood acute respiratory tract infections in Nigeria, 2003–2013: a decade of progress and stagnation. *Bmc Infectious Diseases* 2018; **18**.
14. Alam DS, Chowdhury MA, Siddiquee AT, et al. Adult cardiopulmonary mortality and indoor air pollution: a 10-year retrospective cohort study in a low-income rural setting. *Glob Heart* 2012; **7**(3): 215–21.
15. Alam DS, Chowdhury MA, Siddiquee AT, Ahmed S, Clemens JD. Prevalence and Determinants of Chronic Obstructive Pulmonary Disease (COPD) in Bangladesh. *COPD* 2015; **12**(6): 658–67.
16. Aldous MB, Holberg CJ, Wright AL, Martinez FD, Taussig LM. Evaporative cooling and other home factors and lower respiratory tract illness during the first year of life. Group Health Medical Associates. *Am J Epidemiol* 1996; **143**(5): 423–30.
17. Alemayehu M, Alemu K, Sharma HR, Zemicheal G, Abera S. Household fuel use and acute respiratory infections in children under five years of age in Gondar city of Ethiopia. *Journal of Environment and Earth Science* 2014; **4**(7): 77–85.
18. Alemayehu S, Kidanu K, Kahsay T, Kassa M. Risk factors of acute respiratory infections among under five children attending public hospitals in southern Tigray, Ethiopia, 2016/2017. *Bmc Pediatrics* 2019; **19**(1).
19. Alexander DA, Northcross A, Karrison T, et al. Pregnancy outcomes and ethanol cook stove intervention: A randomized-controlled trial in Ibadan, Nigeria. *Environ Int* 2018; **111**((Adu, Ibigbami, Olamijulo, Adepoju) Healthy Life for All Foundation, Ibadan, Nigeria): 152–63.
20. Alim MA, Sarker MAB, Selim S, Karim MR, Yoshida Y, Hamajima N. Respiratory involvements among women exposed to the smoke of traditional biomass fuel and gas fuel in a district of Bangladesh. *Environmental Health and Preventive Medicine* 2014; **19**(2): 126–34.
21. Alvis-Guzman N, De la Hoz-Restrepo F, Montes-Farah J, Paternina-Cacedo A. Effect of biomass smoke on chronic obstructive pulmonary disease in rural localities of Colombia. *Rev Salud Publica (Bogota)* 2013; **15**(4): 589–600.
22. Amegah AK, Jaakkola JJK, Quansah R, Norgbe GK, Dzodzomenyo M. Cooking fuel choices and garbage burning practices as determinants of birth weight: a cross-sectional study in Accra, Ghana. *Environmental Health* 2012; **11**(78).
23. Anteneh ZA, Hassen HY. Determinants of Acute Respiratory Infection Among Children in Ethiopia: A Multilevel Analysis from Ethiopian Demographic and Health Survey. *International Journal of General Medicine* 2020; **13**: 17-26.

24. Arinola GO, Dutta A, Oluwole O, Olopade CO. Household Air Pollution, Levels of Micronutrients and Heavy Metals in Cord and Maternal Blood, and Pregnancy Outcomes. *International journal of environmental research and public health* 2018; **15**(12).
25. Arlington L, Patel AB, Simmons E, et al. Duration of solid fuel cookstove use is associated with increased risk of acute lower respiratory infection among children under six months in rural central India. *PLoS one* 2019; **14**(10): e0224374.
26. Aung WW, Wai KT, Thu HM, et al. Aetiological agents, modifiable risk factors and gamma interferon status of children with acute respiratory infections attending general practitioner's clinics. *Myanmar Health Sciences Research Journal* 2013; **25**(3): 189–95.
27. Awasthi S, Glick HA, Fletcher RH, Ahmed N. Ambient air pollution & respiratory symptoms complex in preschool children. *Indian J Med Res* 1996; **104**(gif, 0374701): 257–62.
28. Azad SMY, Bahauddin KM, Uddin MH, Shamima P. Indoor air pollution and prevalence of acute respiratory infection among children in rural area of Bangladesh. *Journal of Biology, Agriculture and Healthcare* 2014; **4**(2): 60–71.
29. Azizi BH, Henry RL. The effects of indoor environmental factors on respiratory illness in primary school children in Kuala Lumpur. *Int J Epidemiol* 1991; **20**(1): 144–50.
30. Azizi BH, Zulkifli HI, Kasim S. Indoor air pollution and asthma in hospitalized children in a tropical environment. *J Asthma* 1995; **32**(6): 413–8.
31. Baker RJ, Hertz-Picciotto I, Dostal M, et al. Coal home heating and environmental tobacco smoke in relation to lower respiratory illness in Czech children, from birth to 3 years of age. *Environ Health Perspect* 2006; **114**(7): 1126–32.
32. Balakrishnan K, Ghosh S, Thangavel G, et al. Exposures to fine particulate matter (PM<sub>2.5</sub>) and birthweight in a rural-urban, mother-child cohort in Tamil Nadu, India. *Environ Res* 2018; **161**(Balakrishnan, Ghosh, Thangavel, Sambandam, Mukhopadhyay, Puttaswamy, Sadasivam, Ramaswamy, Johnson, Kuppaswamy, Natesan, Maheshwari, Natarajan, Rajendran, Ramasami, Madhav, Manivannan, Nargunanadan, Natarajan, Saidam, Chakraborty, Balakrishnan, Thanaseka): 524–31.
33. Barone-Adesi F, Chapman RS, Silverman DT, et al. Risk of lung cancer associated with domestic use of coal in Xuanwei, China: retrospective cohort study. *British Medical Journal* 2012; **345**(e5414).
34. Barria PRM, Calvo GM. Factors associated to morbidity consultations due respiratory infection within first three months of life. *Revista Chilena de Pediatría* 2008; **79**(3): 281–9.
35. Barry AC, Mannino DM, Hopenhayn C, Bush H. Exposure to indoor biomass fuel pollutants and asthma prevalence in Southeastern Kentucky: results from the Burden of Lung Disease (BOLD) study. *J Asthma* 2010; **47**(7): 735–41.
36. Bassani DG, Jha P, Dhingra N, Kumar R. Child mortality from solid-fuel use in India: a nationally-representative case-control study. *BMC Public Health* 2010; **10**(100968562): 491.
37. Bassig BA, Dean Hosgood H, Shu XO, et al. Ischaemic heart disease and stroke mortality by specific coal type among non-smoking women with substantial indoor air pollution exposure in China. *International journal of epidemiology* 2019; ((Xiang) State Key Laboratory of Oncogene and Related Genes & Department of Epidemiology, Shanghai Cancer Institute, Renji Hospital, Shanghai Jiao Tong University School of Medicine, Shanghai, China).
38. Bates MN, Chandyo RK, Valentiner-Branth P, et al. Acute lower respiratory infection in childhood and household fuel use in Bhaktapur, Nepal. *Environ Health Perspect* 2013; **121**(5): 637–42.
39. Bates MN, Pokhrel AK, Chandyo RK, et al. Kitchen PM<sub>2.5</sub> concentrations and child acute lower respiratory infection in Bhaktapur, Nepal: The importance of fuel type. *Environmental Research* 2018; **161**: 546–53.
40. Bates MN, Pope K, Sijali TR, et al. Household fuel use and pulmonary tuberculosis in western Nepal: A case-control study. *Environmental Research* 2019; **168**: 193–205.
41. Bautista LE, Correa A, Baumgartner J, Breyse P, Matanoski GM. Indoor charcoal smoke and acute respiratory infections in young children in the Dominican Republic. *Am J Epidemiol* 2009; **169**(5): 572–80.
42. Behera D, Balamugesh T. Indoor air pollution as a risk factor for lung cancer in women. *The Journal of the Association of Physicians of India* 2005; **53**(hg7, 7505585): 190–2.
43. Behera D, Aggarwal G. Domestic cooking fuel exposure and tuberculosis in Indian women. *Indian Journal of Chest Diseases and Allied Sciences* 2010; **52**(3): 139–43.
44. Behrens T, Maziak W, Weiland SK, Rzehak P, Siebert E, Keil U. Symptoms of asthma and the home environment. The ISAAC I and III cross-sectional surveys in Munster, Germany. *Int Arch Allergy Immunol* 2005; **137**(1): 53–61.
45. Belanger K, Beckett W, Triche E, et al. Symptoms of wheeze and persistent cough in the first year of life: Associations with indoor allergens, air contaminants, and maternal history of asthma. *American Journal of Epidemiology* 2003; **158**(3): 195–202.
46. Belanger K, Gent JF, Triche EW, Bracken MB, Leaderer BP. Association of indoor nitrogen dioxide exposure with respiratory symptoms in children with asthma. *Am J Respir Crit Care Med* 2006; **173**(3): 297–303.
47. Belanger K, Holford TR, Gent JF, Hill ME, Kezik JM, Leaderer BP. Household levels of nitrogen dioxide and pediatric asthma severity. *Epidemiology (Cambridge, Mass)* 2013; **24**(2): 320–30.

48. Bhat YR, Manjunath N, Sanjay D, Dhanya Y. Association of indoor air pollution with acute lower respiratory tract infections in children under 5 years of age. *Paediatrics and International Child Health* 2012; **32**(3): 132–5.
49. Bhat RY, Manjunath N. Correlates of acute lower respiratory tract infections in children under 5 years of age in India. *Int J Tuberc Lung Dis* 2013; **17**(3): 418–22.
50. Owusu Boadi K, Kuitunen M. Factors affecting the choice of cooking fuel, cooking place and respiratory health in the Accra metropolitan area, Ghana. *Journal of biosocial science* 2006; **38**(3): 403–12.
51. Bothwell JE, Stewart MC, Shields MD, McManus L, Crawford VLS, Burns G. Home heating and respiratory symptoms among children in Belfast, northern Ireland. *Archives of Environmental Health* 2003; **58**(9): 549–53.
52. Boy E, Bruce N, Delgado H. Birth weight and exposure to kitchen wood smoke during pregnancy in rural Guatemala. *Environ Health Perspect* 2002; **110**(1): 109–14.
53. Broor S, Pandey RM, Ghosh M, et al. Risk factors for severe acute lower respiratory tract infection in under-five children. *Indian Pediatr* 2001; **38**(12): 1361–9.
54. Bruce N, Neufeld L, Boy E, West C. Indoor biofuel air pollution and respiratory health: the role of confounding factors among women in highland Guatemala. *International Journal of Epidemiology* 1998; **27**(3): 454–8.
55. Buchner H, Rehfuess EA. Cooking and season as risk factors for acute lower respiratory infections in African children: a cross-sectional multi-country analysis. *PLoS One* 2015; **10**(6): e0128933.
56. Budge PJ, Griffin MR, Edwards KM, et al. Impact of home environment interventions on the risk of influenza-associated ARI in Andean children: observations from a prospective household-based cohort study. *PLoS One* 2014; **9**(3): e91247.
57. Budhathoki SS, Tinkari BS, Bhandari A, et al. The Association of Childhood Pneumonia with Household Air Pollution in Nepal: Evidence from Nepal Demographic Health Surveys. *Maternal and Child Health Journal* 2020; **24**(SUPPL 1).
58. Bueso A, Figueroa M, Cousin L, et al. Poverty-associated risk factors for wheezing in the first year of life in Honduras and El Salvador. *Allergol Immunopathol (Madr)* 2010; **38**(4): 203–12.
59. Bulkow LR, Singleton RJ, DeByle C, et al. Risk factors for hospitalization with lower respiratory tract infections in children in rural Alaska. *Pediatrics* 2012; **129**(5): e1220–7.
60. Burr ML, Anderson HR, Austin JB, et al. Respiratory symptoms and home environment in children: a national survey. *Thorax* 1999; **54**(1): 27–32.
61. Buthelezi SA, Kapwata T, Wernecke B, Webster C, Mathee A, Wright CY. Household Fuel Use for Heating and Cooking and Respiratory Health in a Low-Income, South African Coastal Community. *International journal of environmental research and public health* 2019; **16**(4).
62. Butland BK, Strachan DP, Anderson HR. The home environment and asthma symptoms in childhood: two population based case-control studies 13 years apart. *Thorax* 1997; **52**(7): 618–24.
63. Cardoso AM, Coimbra CE, Jr., Werneck GL. Risk factors for hospital admission due to acute lower respiratory tract infection in Guarani indigenous children in southern Brazil: a population-based case-control study. *Trop Med Int Health* 2013; **18**(5): 596–607.
64. Cardoso AM, Horta BL, Santos RV, Escobar AL, Welch JR, Coimbra CE, Jr. Prevalence of pneumonia and associated factors among indigenous children in Brazil: results from the First National Survey of Indigenous People's Health and Nutrition. *Int Health* 2015; **7**(6): 412–9.
65. Carlsten C, Brauer M, Dimich-Ward H, Dybuncio A, Becker AB, Chan-Yeung M. Combined exposure to dog and indoor pollution: incident asthma in a high-risk birth cohort. *Eur Respir J* 2011; **37**(2): 324–30.
66. Casas L, Tischer C, Tiesler C, et al. Association of gas cooking with children's respiratory health: results from GINIplus and LISAPLUS birth cohort studies. *Indoor Air* 2012; **22**(6): 476–82.
67. Cerqueiro MC, Murtagh P, Halac A, Avila M, Weissenbacher M. Epidemiologic risk factors for children with acute lower respiratory tract infection in Buenos Aires, Argentina: a matched case-control study. *Rev Infect Dis* 1990; **12 Suppl 8**: S1021–8.
68. Cetinkaya F, Gulmez I, Aydin T, Ozturk Y, Ozesmi M, Demir R. Prevalence of chronic bronchitis and associated risk factors in a rural area of Kayseri, Central Anatolia, Turkey. *Monaldi Arch Chest Dis* 2000; **55**(3): 189–93.
69. Chan KH, Kurmi OP, Bennett DA, et al. Solid Fuel Use and Risks of Respiratory Diseases A Cohort Study of 280,000 Chinese Never-Smokers. *American Journal of Respiratory and Critical Care Medicine* 2019; **199**(3): 352–61.
70. Chen CJ, Wu HY, Chuang YC, et al. Epidemiologic characteristics and multiple risk factors of lung cancer in Taiwan. *Anticancer Res* 1990; **10**(4): 971–6.
71. Chen HC, Wu CF, Chong IW, Wu MT. Exposure to cooking oil fumes and chronic bronchitis in nonsmoking women aged 40 years and over: a health-care based study. *BMC Public Health* 2018; **18**(1): 246.
72. Choi JY, Baumgartner J, Harnden S, et al. Increased risk of respiratory illness associated with kerosene fuel use among women and children in urban Bangalore, India. *Occupational and environmental medicine* 2015; **72**(2): 114–22.



73. Clark ML, Peel JL, Burch JB, et al. Impact of improved cookstoves on indoor air pollution and adverse health effects among Honduran women. *Int J Environ Health Res* 2009; **19**(5): 357–68.
74. Coggon D, Barker DJ, Inskip H, Wield G. Housing in early life and later mortality. *J Epidemiol Community Health* 1993; **47**(5): 345–8.
75. Coker ES, Smit E, Harding AK, Molitor J, Kile ML. A cross sectional analysis of behaviors related to operating gas stoves and pneumonia in U.S. children under the age of 5. *BMC Public Health* 2015; **15**(77): 77.
76. Collings DA, Sithole SD, Martin KS. Indoor woodsmoke pollution causing lower respiratory disease in children. *Trop Doct* 1990; **20**(4): 151–5.
77. Comstock GW, Meyer MB, Helsing KJ, Tockman MS. Respiratory effects on household exposures to tobacco smoke and gas cooking. *Am Rev Respir Dis* 1981; **124**(2): 143–8.
78. Crampin AC, Glynn JR, Floyd S, et al. Tuberculosis and gender: exploring the patterns in a case control study in Malawi. *International Journal of Tuberculosis and Lung Disease* 2004; **8**(2): 194–203.
79. da Silva LFF, Saldiva SRDM, Saldiva PHN, Dolnikoff M. Impaired lung function in individuals chronically exposed to biomass combustion. *Environmental Research* 2012; **112**(Department of Pathology, University of Sao Paulo School of Medicine, Sao Paulo, Brazil.): 111–7.
80. Dagoye D, Bekele Z, Woldemichael K, et al. Domestic risk factors for wheeze in urban and rural Ethiopian children. *QJM* 2004; **97**(8): 489–98.
81. Dai XD, Lin CY, Sun XW, Shi YB, Lin YJ. The etiology of lung cancer in nonsmoking females in Harbin, China. *Lung Cancer* 1996; **14 Suppl 1**(SUPPL. 1): S85–91.
82. Daigler GE, Markello SJ, Cummings KM. The effect of indoor air pollutants on otitis media and asthma in children. *Laryngoscope* 1991; **101**(3): 293–6.
83. Das I, Jagger P, Yeatts K. Biomass Cooking Fuels and Health Outcomes for Women in Malawi. *Ecohealth* 2017; **14**(1): 7–19.
84. Montes de Oca M, Zabert G, Moreno D, Laucho-Contreras ME, Lopez Varela MV, Surmont F. Smoke, Biomass Exposure, and COPD Risk in the Primary Care Setting: The PUMA Study. *Respir Care* 2017; **62**(8): 1058–66.
85. Dekker C, Dales R, Bartlett S, Brunekreef B, Zwanenburg H. Childhood asthma and the indoor environment. *Chest* 1991; **100**(4): 922–6.
86. Dennis RJ, Maldonado D, Norman S, Baena E, Martinez G. Woodsmoke exposure and risk for obstructive airways disease among women. *Chest* 1996; **109**(1): 115–9.
87. Desalu OO, Adekoya AO, Ampitan BA. Increased risk of respiratory symptoms and chronic bronchitis in women using biomass fuels in Nigeria. *Jornal Brasileiro De Pneumologia* 2010; **36**(4): 441–6.
88. Devien L, Giovannelli J, Cuny D, et al. Sources of household air pollution: The association with lung function and respiratory symptoms in middle-aged adult. *Environ Res* 2018; **164**((Matran, Hulo, Edme) Pulmonary Function Testing Department, CHU Lille, Lille F-59000, France): 140–8.
89. Dhanaraj B, Papanna MK, Adinarayanan S, et al. Prevalence and risk factors for adult pulmonary tuberculosis in a metropolitan city of South India. *PLoS One* 2015; **10**(4): e0124260.
90. Dharmage SC, Rajapaksa LC, Fernando DN. Risk factors of acute lower respiratory tract infections in children under five years of age. *Southeast Asian J Trop Med Public Health* 1996; **27**(1): 107–10.
91. Diette GB, Hansel NN, Buckley TJ, et al. Home indoor pollutant exposures among inner-city children with and without asthma. *Environ Health Perspect* 2007; **115**(11): 1665–9.
92. Ding W, Wang X, Zhu F. Indoor environment and childhood asthma in Ningxia: a case-control study. *Journal of Environment and Health* 2009; **26**(9): 804–5.
93. Ding YP, Yao HX, Tang XL, et al. An epidemiology study of bronchial asthma in the Li ethnic group in China. *Asian Pacific Journal of Tropical Medicine* 2012; **5**(2): 157–61.
94. Ding Y, Xu J, Yao J, et al. The analyses of risk factors for COPD in the Li ethnic group in Hainan, People's Republic of China. *Int J Chron Obstruct Pulmon Dis* 2015; **10**(101273481): 2593–600.
95. Dockery D, Spengler J, Neas L, et al. An epidemiologic study of respiratory health status and indicators of indoor air pollution from combustion sources; 1989.
96. Dodge R. The effects of indoor pollution on Arizona children. *Arch Environ Health* 1982; **37**(3): 151–5.
97. Dohoo C, Guernsey JR, Critchley K, VanLeeuwen J. Pilot study on the impact of biogas as a fuel source on respiratory health of women on rural Kenyan smallholder dairy farms. *J Environ Public Health* 2012; **2012**(101516361): 636298.
98. Dong GH, Ma YN, Ding HL, et al. Housing characteristics, home environmental factors and respiratory health in 3945 pre-school children in China. *Int J Environ Health Res* 2008; **18**(4): 267–82.
99. Dong GH, Ma YN, Ding HL, et al. Effects of housing characteristics and home environmental factors on respiratory symptoms of 10,784 elementary school children from northeast china. *Respiration* 2008; **76**(1): 82–91.
100. Dong GH, Qian ZM, Wang J, et al. Residential characteristics and household risk factors and respiratory diseases in Chinese women: the Seven Northeast Cities (SNEC) study. *The Science of the total environment* 2013; **463-464**(uj0, 0330500): 389–94.
101. Dossing M, Khan J, al-Rabiah F. Risk factors for chronic obstructive lung disease in Saudi Arabia. *Respir Med* 1994; **88**(7): 519–22.

102. Dow L, Phelps L, Fowler L, Waters K, Coggon D, Holgate ST. Respiratory symptoms in older people and use of domestic gas appliances. *Thorax* 1999; **54**(12): 1104–6.
103. Du YX, Cha Q, Chen XW, et al. An epidemiological study of risk factors for lung cancer in Guangzhou, China. *Lung Cancer* 1996; **14**(1): S9–S37.
104. Dutt D, Srinivasa DK, Rotti SB, Sahai A, Konar D. Effect of indoor air pollution on the respiratory system of women using different fuels for cooking in an urban slum of Pondicherry. *National Medical Journal of India* 1996; **9**(3): 113–7.
105. Dutta A, Ray MR. Hypertension and respiratory health in biomass smoke-exposed premenopausal Indian women. *Air Quality, Atmosphere & Health* 2013; **7**(2): 229–38.
106. Ehrlich RI, White N, Norman R, et al. Predictors of chronic bronchitis in South African adults. *Int J Tuberc Lung Dis* 2004; **8**(3): 369–76.
107. Eisner MD, Yelin EH, Katz PP, Earnest G, Blanc PD. Exposure to indoor combustion and adult asthma outcomes: environmental tobacco smoke, gas stoves, and woodsmoke. *Thorax* 2002; **57**(11): 973–8.
108. Eisner MD, Blanc PD. Gas stove use and respiratory health among adults with asthma in NHANES III. *Occupational and environmental medicine* 2003; **60**(10): 759–64.
109. Ekici A, Ekici M, Kurtipek E, et al. Obstructive airway diseases in women exposed to biomass smoke. *Environ Res* 2005; **99**(1): 93–8.
110. Elf JL, Eke O, Rakgokong M, et al. Indoor air pollution from secondhand tobacco smoke, solid fuels, and kerosene in homes with active tuberculosis disease in South Africa. *BMC Res Notes* 2017; **10**(1): 591.
111. Elf JL, Kinikar A, Khadse S, et al. The association of household fine particulate matter and kerosene with tuberculosis in women and children in Pune, India. *Occupational and environmental medicine* 2019; **76**(1): 40–7.
112. Emenius G, Pershagen G, Berglind N, et al. NO<sub>2</sub>, as a marker of air pollution, and recurrent wheezing in children: a nested case-control study within the BAMSE birth cohort. *Occupational and environmental medicine* 2003; **60**(11): 876–81.
113. Emuron D, Siddharthan T, Morgan B, et al. Lack of an Association Between Household Air Pollution Exposure and Previous Pulmonary Tuberculosis. *Lung* 2019; **197**(6): 793–801.
114. Epstein MB, Bates MN, Arora NK, Balakrishnan K, Jack DW, Smith KR. Household fuels, low birth weight, and neonatal death in India: the separate impacts of biomass, kerosene, and coal. *Int J Hyg Environ Health* 2013; **216**(5): 523–32.
115. Esplugues A, Ballester F, Estarlich M, et al. Outdoor, but not indoor, nitrogen dioxide exposure is associated with persistent cough during the first year of life. *The Science of the total environment* 2011; **409**(22): 4667–73.
116. Esplugues A, Estarlich M, Sunyer J, et al. Prenatal exposure to cooking gas and respiratory health in infants is modified by tobacco smoke exposure and diet in the INMA birth cohort study. *Environmental Health* 2013; **12**(101147645): 100.
117. Etiler N, Velipasaoglu S, Aktekin M. Incidence of acute respiratory infections and the relationship with some factors in infancy in Antalya, Turkey. *Pediatrics International* 2002; **44**(1): 64–9.
118. Ezeh OK, Agho KE, Dibley MJ, Hall JJ, Page AN. The effect of solid fuel use on childhood mortality in Nigeria: evidence from the 2013 cross-sectional household survey. *Environ Health* 2014; **13**(Journal Article): 113.
119. Fagbule D, Ekanem EE. Some Environmental Risk-Factors for Childhood Asthma - a Case-Control Study. *Annals of Tropical Paediatrics* 1994; **14**(1): 15–9.
120. Faizan MA, Thakur R. Association Between Solid Cooking Fuels and Respiratory Disease Across Socio-Demographic Groups in India. *Journal of Health and Pollution* 2019; **9**(23).
121. Fakunle GA, Ana GR, Ayede AI. Environmental risk factors for acute respiratory infections in hospitalized children under 5 years of age in Ibadan, Nigeria. *Paediatr Int Child Health* 2014; **34**(2): 120–4.
122. Farrow A, Greenwood R, Preece S, Golding J. Nitrogen dioxide, the oxides of nitrogen, and infants' health symptoms. ALSPAC Study Team. Avon Longitudinal Study of Pregnancy and Childhood. *Arch Environ Health* 1997; **52**(3): 189–94.
123. Fatmi Z, Coggon D, Kazi A, Naeem I, Kadir MM, Sathiakumar N. Solid fuel use is a major risk factor for acute coronary syndromes among rural women: a matched case control study. *Public Health* 2014; **128**(1): 77–82.
124. Fatmi Z, Ntani G, Coggon D. Coronary heart disease, hypertension and use of biomass fuel among women: comparative cross-sectional study. *BMJ Open* 2019; **9**(8).
125. Fedortsiv O, Brozek GM, Luchyshyn N, et al. Prevalence of childhood asthma, rhinitis, and eczema in the Ternopil region of Ukraine--results of BUPAS study. *Adv Med Sci* 2012; **57**(2): 282–9.
126. Xu F, Yin X, Shen H, Xu Y, Ware RS, Owen N. Better understanding the influence of cigarette smoking and indoor air pollution on chronic obstructive pulmonary disease: a case-control study in Mainland China. *Respirology* 2007; **12**(6): 891–7.
127. Firdaus G, Ahmad A. Indoor air pollution and self-reported diseases - a case study of NCT of Delhi. *Indoor Air* 2011; **21**(5): 410–6.

128. Fischer PH, Kriz B, Martuzzi M, et al. Risk factors indoors and prevalences of childhood respiratory health in four countries in Western and Central Europe. *Indoor Air-International Journal of Indoor Air Quality and Climate* 1998; **8**(4): 244–54.
129. Foote EM, Gieraltowski L, Ayers T, et al. Impact of locally-produced, ceramic cookstoves on respiratory disease in children in rural western Kenya. *Am J Trop Med Hyg* 2013; **88**(1): 132–7.
130. Franklin PJ, Loveday J, Cook A. Unflued gas heaters and respiratory symptoms in older people with asthma. *Thorax* 2012; **67**(4): 315–20.
131. Galeone C, Pelucchi C, La Vecchia C, Negri E, Bosetti C, Hu J. Indoor air pollution from solid fuel use, chronic lung diseases and lung cancer in Harbin, Northeast China. *Eur J Cancer Prev* 2008; **17**(5): 473–8.
132. Gao YT, Blot WJ, Zheng W, et al. Lung cancer among Chinese women. *International journal of cancer* 1987; **40**(5): 604–9.
133. Cecilia Garcia-Sancho M, Garcia-Garcia L, Baez-Saldana R, et al. Indoor pollution as an occupational risk factor for tuberculosis among women: a population-based, gender oriented, case-control study in Southern Mexico. *REVISTA DE INVESTIGACION CLINICA-CLINICAL AND TRANSLATIONAL INVESTIGATION* 2009; **61**(5): 392–8.
134. Garrett MH, Hooper MA, Hooper BM, Abramson MJ. Respiratory symptoms in children and indoor exposure to nitrogen dioxide and gas stoves. *Am J Respir Crit Care Med* 1998; **158**(3): 891–5.
135. Gaviola C, Miele CH, Wise RA, et al. Urbanisation but not biomass fuel smoke exposure is associated with asthma prevalence in four resource-limited settings. *Thorax* 2016; **71**(2): 154–60.
136. Ghimire PR, Agho KE, Renzaho AMN, Nisha MK, Dibley M, Raynes-Greenow C. Factors associated with perinatal mortality in Nepal: evidence from Nepal demographic and health survey 2001-2016. *BMC Pregnancy and Childbirth* 2019; **19**.
137. Ghosh S. Indoor air pollution in India and a baby's size at birth: is there a link? *World Health & Population* 2006; **8**(4): 34–50.
138. Gillespie-Bennett J, Pierse N, Wickens K, et al. The respiratory health effects of nitrogen dioxide in children with asthma. *Eur Respir J* 2011; **38**(2): 303–9.
139. Gninafon M, Ade G, Ait-Khaled N, Enarson DA, Chiang CY. Exposure to combustion of solid fuel and tuberculosis: a matched case-control study. *Eur Respir J* 2011; **38**(1): 132–8.
140. Golshan M, Faghihi M, Marandi MM. Indoor women jobs and pulmonary risks in rural areas of Isfahan, Iran, 2000. *Respir Med* 2002; **96**(6): 382–8.
141. Gonzalez-Garcia M, Caballero A, Jaramillo C, Maldonado D, Torres-Duque CA. Prevalence, risk factors and underdiagnosis of asthma and wheezing in adults 40 years and older: A population-based study. *J Asthma* 2015; **52**(8): 823–30.
142. Guggisberg M, Hessel PA, Michaelchuk D, Ahmed I. Respiratory symptoms and exposure to wood smoke in an isolated northern community. *Can J Public Health* 2003; **94**(5): 372–6.
143. Gupta BN, Mathur N. A study of household environmental risk factors pertaining to respiratory diseases; 1997.
144. Gupta D, Boffetta P, Gaborieau V, Jindal SK. Risk factors of lung cancer in Chandigarh, India. *Indian Journal of Medical Research* 2001; **113**(gjf, 0374701): 142–50.
145. Gurley ES, Homaira N, Salje H, et al. Indoor exposure to particulate matter and the incidence of acute lower respiratory infections among children: a birth cohort study in urban Bangladesh. *Indoor Air* 2013; **23**(5): 379–86.
146. Hansel NN, Breysse PN, McCormack MC, et al. A longitudinal study of indoor nitrogen dioxide levels and respiratory symptoms in inner-city children with asthma. *Environ Health Perspect* 2008; **116**(10): 1428–32.
147. Hansel NN, McCormack MC, Belli AJ, et al. In-home air pollution is linked to respiratory morbidity in former smokers with chronic obstructive pulmonary disease. *Am J Respir Crit Care Med* 2013; **187**(10): 1085–90.
148. Haque MA, Barman N, Islam MT, et al. Biomass Fuel Smoke and Tuberculosis: A Case-Control Study. *Mymensingh medical journal : MMJ* 2016; **25**(1): 31–8.
149. Harerimana JM, Nyirazinyoye L, Thomson DR, Ntaganira J. Social, economic and environmental risk factors for acute lower respiratory infections among children under five years of age in Rwanda. *Archives of Public Health* 2016; **74**(19).
150. Hasan MM, Richardson A. How sustainable household environment and knowledge of healthy practices relate to childhood morbidity in South Asia: analysis of survey data from Bangladesh, Nepal and Pakistan. *BMJ Open* 2017; **7**(6): e015019.
151. Hasan M, Tasfina S, Haque SMR, et al. Association of biomass fuel smoke with respiratory symptoms among children under 5 years of age in urban areas: results from Bangladesh Urban Health Survey, 2013. *Environmental health and preventive medicine* 2019; **24**(1): 65.
152. Hazra A, Datta S, Guha M. Effect of Household Environment on Women's Health in North-East India. *Population and Environment Linkages*; (15): 264–74.
153. Helsing KJ, Comstock GW, Meyer MB, Tockman ML. Respiratory effects of household exposures to tobacco smoke and gas cooking on nonsmokers. *Environment International* 1982; **8**(1): 365–70.

154. Hernandez-Garduno E, Brauer M, Perez-Neria J, Vedal S. Wood smoke exposure and lung adenocarcinoma in non-smoking Mexican women. *Int J Tuberc Lung Dis* 2004; **8**(3): 377–83.
155. Hersoug LG, Husemoen LL, Sigsgaard T, Madsen F, Linneberg A. Indoor exposure to environmental cigarette smoke, but not other inhaled particulates associates with respiratory symptoms and diminished lung function in adults. *Respirology* 2010; **15**(6): 993–1000.
156. Hessel PA, Klaver J, Michaelchuk D, McGhan S, Carson MM, Melvin D. The epidemiology of childhood asthma in Red Deer and Medicine Hat, Alberta. *Can Respir J* 2001; **8**(3): 139–46.
157. Hoek G, Brunekreef B, Meijer R, Scholten A, Boleij J. Indoor nitrogen dioxide pollution and respiratory symptoms of schoolchildren. *Int Arch Occup Environ Health* 1984; **55**(1): 79–86.
158. Holscher B, Heinrich J, Jacob B, Ritz B, Wichmann HE. Gas cooking, respiratory health and white blood cell counts in children. *Int J Hyg Environ Health* 2000; **203**(1): 29–37.
159. Honicky RE, Osborne JS, Akpom CA. Symptoms of Respiratory Illness in Young-Children and the Use of Wood-Burning Stoves for Indoor Heating. *Pediatrics* 1985; **75**(3): 587–93.
160. Hosein HR, Corey P, Robertson JM. The effect of domestic factors on respiratory symptoms and FEV1. *Int J Epidemiol* 1989; **18**(2): 390–6.
161. Hosgood HD, 3rd, Chapman R, Shen M, et al. Portable stove use is associated with lower lung cancer mortality risk in lifetime smoky coal users. *Br J Cancer* 2008; **99**(11): 1934–9.
162. Hosgood HD, 3rd, Boffetta P, Greenland S, et al. In-home coal and wood use and lung cancer risk: a pooled analysis of the International Lung Cancer Consortium. *Environ Health Perspect* 2010; **118**(12): 1743–7.
163. Howden-Chapman P, Pierse N, Nicholls S, et al. Effects of improved home heating on asthma in community dwelling children: randomised controlled trial. *BMJ* 2008; **337**(8900488, bmj, 101090866): a1411.
164. Huang C, Zhang X, Qiao Z, et al. A case-control study of dietary factors in patients with lung cancer. *Biomed Environ Sci* 1992; **5**(3): 257–65.
165. Hystad P, Duong M, Brauer M, et al. Health Effects of Household Solid Fuel Use: Findings from 11 Countries within the Prospective Urban and Rural Epidemiology Study. *Environmental Health Perspectives* 2019; **127**(5).
166. Indahsari N, Noor NN, Arsyad DS, Acm. Relationship Of Exposure Of Air Pollution In House With Occurrence Of Acute Respiratory Infections In Children Under Five At Puskesmas Malimongan Baru in 2016; 2018.
167. Infante-Rivard C. Childhood asthma and indoor environmental risk factors. *American journal of epidemiology* 1993; **137**(8): 834–44.
168. Ingale LT, Dube KJ, Sarode DB, Attarde SB, Ingle ST. Monitoring and respiratory health assessment of the population exposed to cooking fuel emissions in a rural area of Jalgaon district, India. *Asia Pac J Public Health* 2013; **25**(6): 463–75.
169. Islam F, Sarma R, Debroy A, Kar S, Pal R. Profiling acute respiratory tract infections in children from assam, India. *J Glob Infect Dis* 2013; **5**(1): 8–14.
170. Jafta N, Jeena PM, Barregard L, Naidoo RN. Association of childhood pulmonary tuberculosis with exposure to indoor air pollution: a case control study. *BMC Public Health* 2019; **19**.
171. Jaganath D, Miranda JJ, Gilman RH, et al. Prevalence of chronic obstructive pulmonary disease and variation in risk factors across four geographically diverse resource-limited settings in Peru. *Respir Res* 2015; **16**: 40.
172. Jamali T, Fatmi Z, Shahid A, Khoso A, Kadir MM, Sathiakumar N. Evaluation of short-term health effects among rural women and reduction in household air pollution due to improved cooking stoves: quasi experimental study. *Air Quality Atmosphere and Health* 2017; **10**(7): 809–19.
173. Janjua NZ, Mahmood B, Dharma VK, Sathiakumar N, Khan MI. Use of biomass fuel and acute respiratory infections in rural Pakistan. *Public Health* 2012; **126**(10): 855–62.
174. Jarvis D, Chinn S, Luczynska C, Burney P. Association of respiratory symptoms and lung function in young adults with use of domestic gas appliances. *Lancet* 1996; **347**(8999): 426–31.
175. Jarvis D, Chinn S, Sterne J, Luczynska C, Burney P. The association of respiratory symptoms and lung function with the use of gas for cooking. European Community Respiratory Health Survey. *The European respiratory journal* 1998; **11**(3): 651–8.
176. Jedrychowski W, Tobiasz-Adamczyk B, Flak E, Mroz E, Gomola K. Effect of indoor air pollution caused by domestic cooking on respiratory problems of elderly women. *Environment International* 1990; **16**(1): 57–60.
177. Jedrychowski W, Maugeri U, Gomola K, Tobiasz-Adamczyk B, Bianchi II. Effects of Deomestic Gas Cooking and Passive Smoking on Chronic Respiratory Symptoms and Asthma in Elderly Women. *Int J Occup Environ Health* 1995; **1**(1): 16–20.
178. Jiang M, Qiu J, Zhou M, et al. Exposure to cooking fuels and birth weight in Lanzhou, China: a birth cohort study. *BMC Public Health* 2015; **15**(712): 712.
179. Jie Y, Li KB, Yin T, Jie X. Prevalence of Asthma and Asthma-Related Symptoms Among Adults Exposed to Indoor Environmental Risk Factors: a Comparison between Winter and Summer in Zunyi, China. *Polish Journal of Environmental Studies* 2016; **25**(2): 621–33.

180. Jindal SK, Aggarwal AN, Chaudhry K, et al. A multicentric study on epidemiology of chronic obstructive pulmonary disease and its relationship with tobacco smoking and environmental tobacco smoke exposure. *Indian J Chest Dis Allied Sci* 2006; **48**(1): 23–9.
181. Jindal SK, Aggarwal AN, Gupta D, et al. Indian study on epidemiology of asthma, respiratory symptoms and chronic bronchitis in adults (INSEARCH). *Int J Tuberc Lung Dis* 2012; **16**(9): 1270–7.
182. Johnson AW, Osinusi K, Aderole WI, Gbadero DA, Olaleye OD, Adeyemi-Doro FA. Etiologic agents and outcome determinants of community-acquired pneumonia in urban children: a hospital-based study. *J Natl Med Assoc* 2008; **100**(4): 370–85.
183. Johnson P, Balakrishnan K, Ramaswamy P, et al. Prevalence of chronic obstructive pulmonary disease in rural women of Tamilnadu: implications for refining disease burden assessments attributable to household biomass combustion. *Glob Health Action* 2011; **4**(Department of Physiology, Sri Ramachandra University, No. 1, Ramachandra Nagar, Porur Chennai, Tamilnadu 600 116, India.): 7226.
184. Jubulis J, Kinikar A, Ithape M, et al. Modifiable risk factors associated with tuberculosis disease in children in Pune, India. *International Journal of Tuberculosis and Lung Disease* 2014; **18**(2): 198–204.
185. Juntarawijit Y, Juntarawijit C. Cooking smoke exposure and respiratory symptoms among those responsible for household cooking: A study in Phitsanulok, Thailand. *Heliyon* 2019; **5**(5).
186. Kadam YR, Mimansa A, Chavan PV, Gore AD. Effect of prenatal exposure to kitchen fuel on birth weight. *Indian J Community Med* 2013; **38**(4): 212–6.
187. Kafando B, Savadogo PW, Millogo T, Sana A, Kouanda S, Sondo B. Indoor air pollution and acute respiratory infection prevalence in infants in Ouagadougou. *Sante Publique* 2018; **30**(4): 575–86.
188. Kaji DA, Belli AJ, McCormack MC, et al. Indoor pollutant exposure is associated with heightened respiratory symptoms in atopic compared to non-atopic individuals with COPD. *BMC Pulm Med* 2014; **14**(147).
189. Kan X, Chiang CY, Enarson DA, Chen W, Yang J, Chen G. Indoor solid fuel use and tuberculosis in China: a matched case-control study. *BMC Public Health* 2011; **11**(Journal Article): 498.
190. Kashima S, Yorifuji T, Tsuda T, Ibrahim J, Doi H. Effects of traffic-related outdoor air pollution on respiratory illness and mortality in children, taking into account indoor air pollution, in Indonesia. *J Occup Environ Med* 2010; **52**(3): 340–5.
191. Kasznia-Kocot J, Kowalska M, Gorny RL, Niesler A, Wypych-Slusarska A. Environmental risk factors for respiratory symptoms and childhood asthma. *Ann Agric Environ Med* 2010; **17**(2): 221–9.
192. Khalequzzaman M, Kamijima M, Sakai K, Chowdhury NA, Hamajima N, Nakajima T. Indoor air pollution and its impact on children under five years old in Bangladesh. *Indoor Air* 2007; **17**(4): 297–304.
193. Khan MN, CZ BN, Mofizul Islam M, Islam MR, Rahman MM. Household air pollution from cooking and risk of adverse health and birth outcomes in Bangladesh: a nationwide population-based study. *Environ Health* 2017; **16**(1): 57.
194. Khan MSB, Lohano HD. Household air pollution from cooking fuel and respiratory health risks for children in Pakistan. *Environmental Science and Pollution Research* 2018; **25**(25): 24778–86.
195. Kilabuko JH, Nakai S. Effects of cooking fuels on acute respiratory infections in children in Tanzania. *International journal of environmental research and public health* 2007; **4**(4): 283–8.
196. Kilpelainen M, Koskenvuo M, Helenius H, Terho E. Wood stove heating, asthma and allergies. *Respir Med* 2001; **95**(11): 911–6.
197. Kim C, Chapman RS, Hu W, et al. Smoky coal, tobacco smoking, and lung cancer risk in Xuanwei, China. *Lung Cancer* 2014; **84**(1): 31–5.
198. Kim AS, Cahill E, Cheng NT. Global Stroke Belt: Geographic Variation in Stroke Burden Worldwide. *Stroke* 2015; **46**(12): 3564–70.
199. Kim C, Seow WJ, Shu XO, et al. Cooking Coal Use and All-Cause and Cause-Specific Mortality in a Prospective Cohort Study of Women in Shanghai, China. *Environmental Health Perspectives* 2016; **124**(9): 1384–9.
200. Kiraz K, Kart L, Demir R, et al. Chronic pulmonary disease in rural women exposed to biomass fumes. *Clin Invest Med* 2003; **26**(5): 243–8.
201. Kleimola LB, Patel AB, Borkar JA, Hibberd PL. Consequences of household air pollution on child survival: evidence from demographic and health surveys in 47 countries. *Int J Occup Environ Health* 2015; **21**(4): 294–302.
202. Kleinerman RA, Wang Z, Wang L, et al. Lung cancer and indoor exposure to coal and biomass in rural China. *J Occup Environ Med* 2002; **44**(4): 338–44.
203. Ko YC, Lee CH, Chen MJ, et al. Risk factors for primary lung cancer among non-smoking women in Taiwan. *International Journal of Epidemiology* 1997; **26**(1): 24–31.
204. Kolappan C, Subramani R. Association between biomass fuel and pulmonary tuberculosis: a nested case-control study. *Thorax* 2009; **64**(8): 705–8.
205. Koo LC, Lee N, Ho JH. Do cooking fuels pose a risk for lung cancer? A case-control study of women in Hong Kong. *Ecol Dis* 1983; **2**(4): 255–65.
206. Kraai S, Verhagen LM, Valladares E, et al. High prevalence of asthma symptoms in Warao Amerindian children in Venezuela is significantly associated with open-fire cooking: a cross-sectional observational study. *Respir Res* 2013; **14**(Journal Article): 76.

207. Kristensen IA, Olsen J. Determinants of acute respiratory infections in Soweto - a population-based birth cohort. *Samj South African Medical Journal* 2006; **96**(7): 633–40.
208. Yu K, Qiu GK, Chan KH, et al. Association of Solid Fuel Use With Risk of Cardiovascular and All-Cause Mortality in Rural China. *Jama-Journal of the American Medical Association* 2018; **319**(13): 1351–61.
209. Kuhr J, Hendelkramer A, Karmaus W, et al. Air-Pollution and Asthma among School-Children. *Sozial-Und Praventivmedizin* 1991; **36**(2): 67–73.
210. Kumar S, Awasthi S, Jain A, Srivastava RC. Blood zinc levels in children hospitalized with severe pneumonia: a case control study. *Indian Pediatr* 2004; **41**(5): 486–91.
211. Kumar R, Nagar JK, Raj N, et al. Impact of Domestic Air Pollution from Cooking Fuel on Respiratory Allergies in Children in India. *Asian Pacific Journal of Allergy and Immunology* 2008; **26**(4): 213–22.
212. Kurmi OP, Semple S, Devereux GS, et al. The effect of exposure to biomass smoke on respiratory symptoms in adult rural and urban Nepalese populations. *Environ Health* 2014; **13**(Journal Article): 92.
213. Kurt E, Metintas S, Basyigit I, et al. Prevalence and risk factors of allergies in Turkey: Results of a multicentric cross-sectional study in children. *Pediatr Allergy Immunol* 2007; **18**(7): 566–74.
214. Kurt E, Metintas S, Basyigit I, et al. Prevalence and Risk Factors of Allergies in Turkey (PARFAIT): results of a multicentre cross-sectional study in adults. *Eur Respir J* 2009; **33**(4): 724–33.
215. Kurti SP, Kurti AN, Emerson SR, et al. Household Air Pollution Exposure and Influence of Lifestyle on Respiratory Health and Lung Function in Belizean Adults and Children: A Field Study. *International journal of environmental research and public health* 2016; **13**(7): 643.
216. Kwas H, Rahmouni N, Zendah I, Ghedira H. [Respiratory symptoms and obstructive ventilatory disorder in Tunisian woman exposed to biomass]. *Rev Pneumol Clin* 2017; **73**(3): 120–6.
217. Lakshmi PV, Virdi NK, Thakur JS, Smith KR, Bates MN, Kumar R. Biomass fuel and risk of tuberculosis: a case-control study from Northern India. *J Epidemiol Community Health* 2012; **66**(5): 457–61.
218. Lakshmi PV, Virdi NK, Sharma A, et al. Household air pollution and stillbirths in India: analysis of the DLHS-II National Survey. *Environ Res* 2013; **121**(School of Public Health, Post Graduate Institute of Medical Education and Research (PGIMER), Chandigarh - 160 012, India.): 17–22.
219. Lamichhane P, Sharma A, Mahal A. Impact of cleaner fuel use and improved stoves on acute respiratory infections: evidence from India. *Int Health* 2017; **9**(6): 349–66.
220. Lan Q, Chen W, Chen H, He XZ. Risk factors for lung cancer in non-smokers in Xuanwei County of China. *Biomed Environ Sci* 1993; **6**(2): 112–8.
221. Lan Q, Chapman RS, Schreinemachers DM, Tian L, He X. Household stove improvement and risk of lung cancer in Xuanwei, China. *J Natl Cancer Inst* 2002; **94**(11): 826–35.
222. Lan Q, He X, Shen M, et al. Variation in lung cancer risk by smoky coal subtype in Xuanwei, China. *International journal of cancer* 2008; **123**(9): 2164–9.
223. Laniado-Laborin R, Rendon A, Bauerle O. Chronic obstructive pulmonary disease case finding in Mexico in an at-risk population. *Int J Tuberc Lung Dis* 2011; **15**(6): 818–23.
224. Lanphear BP, Aligne CA, Auinger P, Weitzman M, Byrd RS. Residential exposures associated with asthma in US children. *Pediatrics* 2001; **107**(3): 505–11.
225. Lee CH, Ko YC, Cheng LS, et al. The heterogeneity in risk factors of lung cancer and the difference of histologic distribution between genders in Taiwan. *Cancer Causes Control* 2001; **12**(4): 289–300.
226. Lee MS, Hang JQ, Zhang FY, Dai HL, Su L, Christiani DC. In-home solid fuel use and cardiovascular disease: a cross-sectional analysis of the Shanghai Putuo study. *Environ Health* 2012; **11**(Journal Article): 18.
227. Levesqu B, Allaire S, Gauvin D, et al. Wood-burning appliances and indoor air quality. *The Science of the total environment* 2001; **281**(1-3): 47–62.
228. Lewis JJ, Hollingsworth JW, Chartier RT, et al. Biogas Stoves Reduce Firewood Use, Household Air Pollution, and Hospital Visits in Odisha, India. *Environ Sci Technol* 2017; **51**(1): 560–9.
229. Li SX, Xu J, Jiang ZG, Luo Y, Yang Y, Yu J. Correlation between indoor air pollution and adult respiratory health in Zunyi City in Southwest China: situation in two different seasons. *BMC Public Health* 2019; **19**.
230. Li J, He J, Tang R, et al. Molecular epidemiology study in Xuanwei: the relationship among coal type, genotype and lung cancer risk. *Chinese Journal of Lung Cancer* 2015; **18**(1): 16–22.
231. Li JC, Qin CX, Lv J, et al. Solid Fuel Use and Incident COPD in Chinese Adults: Findings from the China Kadoorie Biobank. *Environmental Health Perspectives* 2019; **127**(5).
232. Lin W, Gehring U, Oldenwening M, et al. Gas cooking, respiratory and allergic outcomes in the PIAMA birth cohort study. *Occupational and environmental medicine* 2013; **70**(3): 187–94.
233. Zhang L, Li J, Wang Y, Wu G, Wei F. Descriptive study of the environmental epidemiology of high lung cancer incidence rate in Qujing, Yunnan, China. *Chinese Journal of Lung Cancer* 2012; **15**(3): 159–63.
234. Lissowska J, Bardin-Mikolajczak A, Fletcher T, et al. Lung cancer and indoor pollution from heating and cooking with solid fuels: the IARC international multicentre case-control study in Eastern/Central Europe and the United Kingdom. *Am J Epidemiol* 2005; **162**(4): 326–33.
235. Liu Q, Sasco AJ, Riboli E, Hu MX. Indoor air pollution and lung cancer in Guangzhou, People's Republic of China. *Am J Epidemiol* 1993; **137**(2): 145–54.

236. Liu S, Zhou Y, Wang X, et al. Biomass fuels are the probable risk factor for chronic obstructive pulmonary disease in rural South China. *Thorax* 2007; **62**(10): 889–97.
237. Liu F, Zhao Y, Liu YQ, et al. Asthma and asthma related symptoms in 23,326 Chinese children in relation to indoor and outdoor environmental factors: the Seven Northeastern Cities (SNEC) Study. *The Science of the total environment* 2014; **497-498**(uj0, 0330500): 10–7.
238. Liu W, Huang C, Hu Y, Zou ZJ, Zhao ZH, Sundell J. Association of building characteristics, residential heating and ventilation with asthmatic symptoms of preschool children in Shanghai: A cross-sectional study. *Indoor and Built Environment* 2014; **23**(2): 270–83.
239. Liu J, Hou BD, Ma XW, Liao H. Solid fuel use for cooking and its health effects on the elderly in rural China. *Environmental Science and Pollution Research* 2018; **25**(4): 3669-80.
240. Liu W, Huang C, Cai J, Wang XY, Zou ZJ, Sun CJ. Household environmental exposures during gestation and birth outcomes: A cross-sectional study in Shanghai, China. *Science of the Total Environment* 2018; **615**: 1110-8.
241. Loeb M, Neupane B, Walter SD, et al. Environmental risk factors for community-acquired pneumonia hospitalization in older adults. *Journal of the American Geriatrics Society* 2009; **57**(6): 1036–40.
242. Luo RX, Wu B, Yi YN, Huang ZW, Lin RT. Indoor burning coal air pollution and lung cancer--a case-control study in Fuzhou, China. *Lung Cancer* 1996; **14 Suppl 1**(SUPPL. 1): S113–9.
243. Mahalanabis D, Gupta S, Paul D, Gupta A, Lahiri M, Khaled MA. Risk factors for pneumonia in infants and young children and the role of solid fuel for cooking: a case-control study. *Epidemiology and infection* 2002; **129**(1): 65–71.
244. Maier WC, Arrighi HM, Morray B, Llewellyn C, Redding GJ. Indoor risk factors for asthma and wheezing among Seattle school children. *Environmental Health Perspectives* 1997; **105**(2): 208–14.
245. Malinauskienė V, Leisyte P, Malinauskas R, Bagdonas G, Jankauskienė L, Malinauskaite I. Outdoor and Indoor Air Pollution and Myocardial Infarction among Women in Kaunas, Lithuania: a Case-Control Study. *Polish Journal of Environmental Studies* 2011; **20**(4): 969–75.
246. Manyeh AK, Kukula V, Odonkor G, et al. Socioeconomic and demographic determinants of birth weight in southern rural Ghana: evidence from Dodowa Health and Demographic Surveillance System. *BMC Pregnancy Childbirth* 2016; **16**(1): 160.
247. Mavalankar DV, Trivedi CR, Gray RH. Levels and risk factors for perinatal mortality in Ahmedabad, India. *Bull World Health Organ* 1991; **69**(4): 435–42.
248. Mavalankar DV, Gray RH, Trivedi CR. Risk factors for preterm and term low birthweight in Ahmedabad, India. *Int J Epidemiol* 1992; **21**(2): 263–72.
249. McConnell R, Berhane K, Gilliland F, et al. Indoor risk factors for asthma in a prospective study of adolescents. *Epidemiology (Cambridge, Mass)* 2002; **13**(3): 288–95.
250. McCormack MC, Breyse PN, Matsui EC, et al. In-home particle concentrations and childhood asthma morbidity. *Environ Health Perspect* 2009; **117**(2): 294–8.
251. Mejias SG, Ramphul K. Prevalence and Associated Risk Factors Bronchial Asthma in Children in Santo Domingo, Dominican Republic. *Cureus* 2018; **10**(2).
252. Melia RJW, Florey CDV, Altman DG, Swan AV. Association between Gas Cooking and Respiratory-Disease in Children. *British Medical Journal* 1977; **2**(6080): 149–52.
253. Melia RJ, Florey CV, Chinn S. The relation between respiratory illness in primary schoolchildren and the use of gas for cooking--I. Results from a national survey. *Int J Epidemiol* 1979; **8**(4): 333–8.
254. Melsom T, Brinch L, Hessen JO, et al. Asthma and indoor environment in Nepal. *Thorax* 2001; **56**(6): 477–81.
255. Menezes AM, Victora CG, Rigatto M. Prevalence and risk factors for chronic bronchitis in Pelotas, RS, Brazil: a population-based study. *Thorax* 1994; **49**(12): 1217–21.
256. Milanzi EB, Namacha NM. Maternal biomass smoke exposure and birth weight in Malawi: Analysis of data from the 2010 Malawi Demographic and Health Survey. *Malawi Med J* 2017; **29**(2): 160–5.
257. Mir AA, Imtiyaz A, Anjum F, Javeed I, Rohul J, Salathia A. Prevalence and risk factor analysis of acute respiratory tract infections in rural areas of Kashmir valley under 5 years of age. *International Journal of Medicine and Public Health* 2012; **2**(3): 47–52.
258. Mishra VK, Retherford RD, Smith KR. Biomass cooking fuels and prevalence of tuberculosis in India. *International journal of infectious diseases : IJID : official publication of the International Society for Infectious Diseases* 1999; **3**(3): 119–29.
259. Mishra V. Effect of indoor air pollution from biomass combustion on prevalence of asthma in the elderly. *Environ Health Perspect* 2003; **111**(1): 71–8.
260. Mishra V. Indoor air pollution from biomass combustion and acute respiratory illness in preschool age children in Zimbabwe. *International Journal of Epidemiology* 2003; **32**(5): 847–53.
261. Mishra V, Dai X, Smith KR, Mika L. Maternal exposure to biomass smoke and reduced birth weight in Zimbabwe. *Ann Epidemiol* 2004; **14**(10): 740–7.
262. Mishra V, Retherford RD, Smith KR. Cooking smoke and tobacco smoke as risk factors for stillbirth. *Int J Environ Health Res* 2005; **15**(6): 397–410.

263. Mishra V, Smith KR, Retherford RD. Effects of cooking smoke and environmental tobacco smoke on acute respiratory infections in young Indian children. *Population and Environment* 2005; **26**(5): 375–96.
264. Misra A, Longnecker MP, Dionisio KL, et al. Household fuel use and biomarkers of inflammation and respiratory illness among rural South African Women. *Environmental Research* 2018; **166**: 112–6.
265. Mitter SS, Vedanthan R, Islami F, et al. Household Fuel Use and Cardiovascular Disease Mortality: Golestan Cohort Study. *Circulation* 2016; **133**(24): 2360–9.
266. Mommers M, Jongmans-Liedekerken AW, Derkx R, et al. Indoor environment and respiratory symptoms in children living in the Dutch-German borderland. *Int J Hyg Environ Health* 2005; **208**(5): 373–81.
267. Moran SE, Strachan DP, Johnston IDA, Anderson HR. Effects of exposure to gas cooking in childhood and adulthood on respiratory symptoms, allergic sensitization and lung function in young British adults. *Clinical and Experimental Allergy* 1999; **29**(8): 1033–41.
268. Morris K, Morgenlander M, Coulehan JL, Gahagen S, Arena VC. Wood-burning stoves and lower respiratory tract infection in American Indian children. *Am J Dis Child* 1990; **144**(1): 105–8.
269. Mortimer K, Ndamala CB, Naunje AW, et al. A cleaner burning biomass-fuelled cookstove intervention to prevent pneumonia in children under 5 years old in rural Malawi (the Cooking and Pneumonia Study): a cluster randomised controlled trial. *Lancet* 2017; **389**(10065): 167–75.
270. Mu L, Liu L, Niu R, et al. Indoor air pollution and risk of lung cancer among Chinese female non-smokers. *Cancer Causes Control* 2013; **24**(3): 439–50.
271. Mukherjee S, Roychoudhury S, Siddique S, et al. Respiratory symptoms, lung function decrement and chronic obstructive pulmonary disease in pre-menopausal Indian women exposed to biomass smoke. *Inhal Toxicol* 2014; **26**(14): 866–72.
272. Mukherjee S, Siddique S, Chakraborty S, et al. Adverse reproductive health outcomes in pre-menopausal Indian women chronically exposed to biomass smoke. *Journal of Public Health-Heidelberg* 2015; **23**(6): 363–72.
273. Murray EL, Brondi L, Kleinbaum D, et al. Cooking fuel type, household ventilation, and the risk of acute lower respiratory illness in urban Bangladeshi children: a longitudinal study. *Indoor Air* 2012; **22**(2): 132–9.
274. Musafiri S, Masaisa F, Bavuma MC, Manzi OO, Kalisa UL, Rutayisire PC. Indoor air pollution from cooking with biomass fuels is a major cause of chronic bronchitis among women in a rural district of Rwanda. *African Journal of Respiratory Medicine* 2018; **14**(1): 16–9.
275. Mustapha BA, Blangiardo M, Briggs DJ, Hansell AL. Traffic air pollution and other risk factors for respiratory illness in schoolchildren in the niger-delta region of Nigeria. *Environ Health Perspect* 2011; **119**(10): 1478–82.
276. Mzileni O, Sitas F, Steyn K, Carrara H, Bekker P. Lung cancer, tobacco, and environmental factors in the African population of the Northern Province, South Africa. *Tob Control* 1999; **8**(4): 398–401.
277. Naz S, Page A, Agho KE. Household Air Pollution and Under-Five Mortality in Bangladesh (2004–2011). *International journal of environmental research and public health* 2015; **12**(10): 12847–62.
278. Naz S, Page A, Agho KE. Household air pollution and under-five mortality in India (1992–2006). *Environ Health* 2016; **15**(Journal Article): 54.
279. Naz S, Page A, Agho KE. Household air pollution from use of cooking fuel and under-five mortality: The role of breastfeeding status and kitchen location in Pakistan. *Plos One* 2017; **12**(3): e0173256.
280. Naz S, Page A, Agho KE. Potential Impacts of Modifiable Behavioral and Environmental Exposures on Reducing Burden of Under-five Mortality Associated with Household Air Pollution in Nepal. *Matern Child Health J* 2018; **22**(1): 59–70.
281. Neas LM, Dockery DW, Ware JH, Spengler JD, Speizer FE, Ferris BG, Jr. Association of indoor nitrogen dioxide with respiratory symptoms and pulmonary function in children. *Am J Epidemiol* 1991; **134**(2): 204–19.
282. Neas LM, Dockery DW, Ware JH, Spengler JD, Ferris BG, Speizer FE. Concentration of Indoor Particulate Matter as a Determinant of Respiratory Health in Children. *American Journal of Epidemiology* 1994; **139**(11): 1088–99.
283. Mbatchou Ngahane BH, Afane Ze E, Chebu C, et al. Effects of cooking fuel smoke on respiratory symptoms and lung function in semi-rural women in Cameroon. *Int J Occup Environ Health* 2015; **21**(1): 61–5.
284. Ngocho JS, de Jonge MI, Minja L, et al. Modifiable risk factors for community-acquired pneumonia in children under 5 years of age in resource-poor settings: a case-control study. *Tropical medicine & international health : TM & IH* 2019; **24**(4): 484–92.
285. Nisha MK, Alam A, Raynes-Greenow C. Variations in perinatal mortality associated with different polluting fuel types and kitchen location in Bangladesh. *International Journal of Occupational and Environmental Health* 2018; **24**(1-2): 47–54.
286. Nitschke M, Pilotto LS, Attewell RG, et al. A cohort study of indoor nitrogen dioxide and house dust mite exposure in asthmatic children. *J Occup Environ Med* 2006; **48**(5): 462–9.
287. Noonan CW, Ward TJ. Environmental tobacco smoke, woodstove heating and risk of asthma symptoms. *J Asthma* 2007; **44**(9): 735–8.
288. Noonan CW, Ward TJ, Navidi W, Sheppard L. A rural community intervention targeting biomass combustion sources: effects on air quality and reporting of children's respiratory outcomes. *Occupational and environmental medicine* 2012; **69**(5): 354–60.



289. Noorhassim I, Rampal KG, Hashim JH. The relationship between prevalence of asthma and environmental factors in rural households. *The Medical journal of Malaysia* 1995; **50**(3): 263–7.
290. Norback D, Lu C, Zhang YP, et al. Sources of indoor particulate matter (PM) and outdoor air pollution in China in relation to asthma, wheeze, rhinitis and eczema among pre-school children: Synergistic effects between antibiotics use and PM10 and second hand smoke. *Environment International* 2019; **125**: 252–60.
291. North CM, Valeri L, Hunt PW, et al. Cooking fuel and respiratory symptoms among people living with HIV in rural Uganda. *ERJ Open Res* 2017; **3**(2): 00094–2016.
292. Obaseki DO, Awopeju OF, Awokola BI, et al. Domestic solid fuel combustion in an adult population in Nigeria: A cross sectional analysis of association with respiratory symptoms, quality of life and lung function. *Respir Med* 2017; **130**(Department of Medicine, Obafemi Awolowo University, Ile-Ife, Nigeria.): 61–8.
293. Oluwole O, Arinola GO, Huo D, Olopade CO. Biomass fuel exposure and asthma symptoms among rural school children in Nigeria. *J Asthma* 2017; **54**(4): 347–56.
294. Orozco-Levi M, Garcia-Aymerich J, Villar J, Ramirez-Sarmiento A, Anto JM, Gea J. Wood smoke exposure and risk of chronic obstructive pulmonary disease. *Eur Respir J* 2006; **27**(3): 542–6.
295. Ostro BD, Lipsett MJ, Mann JK, Krupnick A, Harrington W. Air-Pollution and Respiratory Morbidity among Adults in Southern California. *American Journal of Epidemiology* 1993; **137**(7): 691–700.
296. Ostro BD, Lipsett MJ, Mann JK, Wiener MB, Selner J. Indoor Air-Pollution and Asthma - Results from a Panel Study. *American Journal of Respiratory and Critical Care Medicine* 1994; **149**(6): 1400–6.
297. Owili PO, Muga MA, Pan WC, Kuo HW. Cooking fuel and risk of under-five mortality in 23 Sub-Saharan African countries: a population-based study. *Int J Environ Health Res* 2017; **27**(3): 191–204.
298. Oxlade O, Murray M. Tuberculosis and poverty: why are the poor at greater risk in India? *PLoS One* 2012; **7**(11): e47533.
299. Ozturk AB, Klcaslan Z, Issever H. Effect of smoking and indoor air pollution on the risk of tuberculosis: smoking, indoor air pollution and tuberculosis. *Tuberkuloz ve Toraks* 2014; **62**(1): 1–6.
300. Padhi BK, Padhy PK. Domestic fuels, indoor air pollution, and children's health. *Ann N Y Acad Sci* 2008; **1140**(5nm, 7506858): 209–17.
301. Pan X, Dong Z, Wang L, Yue W. An Evaluation Of The Indoor/Outdoor Air Pollution And Respiratory Health Of Farmers Living In Rural Areas Of Anhui Province, China. *Indoor Air* 2002: 982–7.
302. Pandey S, Lin Y. Adjusted effects of domestic violence, tobacco use, and indoor air pollution from use of solid fuel on child mortality. *Matern Child Health J* 2013; **17**(8): 1499–507.
303. Panigrahi A, Padhi BK. Chronic bronchitis and airflow obstruction is associated with household cooking fuel use among never-smoking women: a community-based cross-sectional study in Odisha, India. *BMC Public Health* 2018; **18**.
304. Pant KP. Cheaper fuel and higher health costs among the poor in rural Nepal. *Ambio* 2012; **41**(3): 271–83.
305. Patel AB, Dhande LA, Pusdekar YV, Borkar JA, Badhoniya NB, Hibberd PL. Childhood illness in households using biomass fuels in India: secondary data analysis of nationally representative national family health surveys. *International Journal of Occupational and Environmental Health* 2013; **19**(1): 35–42.
306. Patel AB, Meleth S, Pasha O, et al. Impact of exposure to cooking fuels on stillbirths, perinatal, very early and late neonatal mortality - a multicenter prospective cohort study in rural communities in India, Pakistan, Kenya, Zambia and Guatemala. *Matern Health Neonatol Perinatol* 2015; **1**: 18.
307. Patel SK, Patel S, Kumar A. Effects of cooking fuel sources on the respiratory health of children: evidence from the Annual Health Survey, Uttar Pradesh, India. *Public health* 2019; **169**(qi7, 0376507): 59–68.
308. Pathirathna ML, Abeywickrama HM, Sekijima K, et al. Effects of Prenatal Tobacco and Wood-Fuel Smoke Exposure on Birth Weight in Sri Lanka. *Healthcare (Basel)* 2017; **5**(4).
309. Patra S, Sharma S, Behera D. Passive smoking, indoor air pollution and childhood tuberculosis: a case control study. *Indian Journal of Tuberculosis* 2012; **59**(3): 151–5.
310. Patra J, Maher YI, Mishra S, et al. Effects of body mass index, tobacco smoking, alcohol drinking and solid fuel use on the risk of asthma: Individual Participant Data (IPD) meta-analysis of 175 000 individuals from 51 nationally representative surveys. *BMJ Open Respir Res* 2016; **3**(1): e000121.
311. Paulin LM, Williams DL, Peng R, et al. 24-h Nitrogen dioxide concentration is associated with cooking behaviors and an increase in rescue medication use in children with asthma. *Environ Res* 2017; **159**(Johns Hopkins Pulmonary/Critical Care, Baltimore, Maryland, USA.): 118–23.
312. Peabody JW, Riddell TJ, Smith KR, et al. Indoor air pollution in rural China: cooking fuels, stoves, and health status. *Arch Environ Occup Health* 2005; **60**(2): 86–95.
313. Perez-Padilla R, Regalado J, Vedal S, et al. Exposure to biomass smoke and chronic airway disease in Mexican women. A case-control study. *Am J Respir Crit Care Med* 1996; **154**(3 Pt 1): 701–6.
314. Perez-Padilla R, Perez-Guzman C, Baez-Saldana R, Torres-Cruz A. Cooking with biomass stoves and tuberculosis: a case control study. *Int J Tuberc Lung Dis* 2001; **5**(5): 441–7.
315. Pershagen G, Rylander E, Norberg S, Eriksson M, Nordvall SL. Air pollution involving nitrogen dioxide exposure and wheezing bronchitis in children. *Int J Epidemiol* 1995; **24**(6): 1147–53.

316. Phillips DIW, Osmond C, Southall H, Aucott P, Jones A, Holgate ST. Evaluating the long-term consequences of air pollution in early life: geographical correlations between coal consumption in 1951/1952 and current mortality in England and Wales. *BMJ Open* 2018; **8**(4).
317. Phoa LL, Toelle BG, Ng K, Marks GB. Effects of gas and other fume emitting heaters on the development of asthma during childhood. *Thorax* 2004; **59**(9): 741–5.
318. Phukan RK, Saikia BJ, Borah PK, Zomawia E, Sekhon GS, Mahanta J. Role of Household Exposure, Dietary Habits and Glutathione S-Transferases M1, T1 Polymorphisms in Susceptibility to Lung Cancer among Women in Mizoram India. *Asian Pacific Journal of Cancer Prevention* 2014; **15**(7): 3253–60.
319. Piekarska B, Stankiewicz-Choroszuca BL, Sybilski AJ, et al. Effect of indoor air quality on the natural history of asthma in an urban population in Poland. *Allergy and Asthma Proceedings* 2018; **39**(6): E64-E70.
320. Pokharel PK, Kabra SK, Kapoor SK, Pandey RM. Risk factors associated with bronchial asthma in school going children of rural Haryana. *Indian J Pediatr* 2001; **68**(2): 103–6.
321. Pokhrel AK, Bates MN, Verma SC, Joshi HS, Sreeramareddy CT, Smith KR. Tuberculosis and indoor biomass and kerosene use in Nepal: a case-control study. *Environ Health Perspect* 2010; **118**(4): 558–64.
322. Ponsonby AL, Couper D, Dwyer T, Carmichael A, Kemp A, Cochrane J. The relation between infant indoor environment and subsequent asthma. *Epidemiology (Cambridge, Mass)* 2000; **11**(2): 128–35.
323. Ponsonby AL, Glasgow N, Gatenby P, et al. The relationship between low level nitrogen dioxide exposure and child lung function after cold air challenge. *Clinical and Experimental Allergy* 2001; **31**(8): 1205–12.
324. Pope CA, 3rd, Xu X. Passive cigarette smoke, coal heating, and respiratory symptoms of nonsmoking women in China. *Environ Health Perspect* 1993; **101**(4): 314–6.
325. PrayGod G, Mukerebe C, Magawa R, Jeremiah K, Torok ME. Indoor Air Pollution and Delayed Measles Vaccination Increase the Risk of Severe Pneumonia in Children: Results from a Case-Control Study in Mwanza, Tanzania. *PLoS One* 2016; **11**(8): e0160804.
326. Prietsch SO, Fischer GB, Cesar JA, et al. [Risk factors for recurrent wheezing in children under 13 years old in the South of Brazil]. *Rev Panam Salud Publica* 2006; **20**(5): 331–7.
327. Qian Z, Chapman RS, Tian Q, Chen Y, Liyo PJ, Zhang J. Effects of air pollution on children's respiratory health in three Chinese cities. *Arch Environ Health* 2000; **55**(2): 126–33.
328. Qian Z, Zhang J, Korn LR, Wei F, Chapman RS. Factor analysis of household factors: are they associated with respiratory conditions in Chinese children? *International journal of epidemiology* 2004; **33**(3): 582–8.
329. Qian Z, He Q, Kong L, et al. Respiratory responses to diverse indoor combustion air pollution sources. *Indoor Air* 2007; **17**(2): 135–42.
330. Qin Y, Zhou B, Xu Z. [A case-control study on risk factor of lung cancer in female nonsmokers]. *Zhongguo Fei Ai Za Zhi* 2002; **5**(2): 98–100.
331. Qu WH, Yan ZJ, Qu GH, Ikram M. Household Solid Fuel Use and Cardiovascular Disease in Rural Areas in Shanxi, China. *Iranian Journal of Public Health* 2015; **44**(5): 625–38.
332. Rabbani U, Sahito A, Nafees AA, Kazi A, Fatmi Z. Pulmonary Tuberculosis Is Associated With Biomass Fuel Use Among Rural Women in Pakistan: An Age- and Residence-Matched Case-Control Study. *Asia Pac J Public Health* 2017; **29**(3): 211–8.
333. Rahut DB, Ali A, Behera B. Domestic use of dirty energy and its effects on human health: empirical evidence from Bhutan. *International Journal of Sustainable Energy* 2017; **36**(10): 983–93.
334. Ram PK, Dutt D, Silk BJ, et al. Household air quality risk factors associated with childhood pneumonia in urban Dhaka, Bangladesh. *Am J Trop Med Hyg* 2014; **90**(5): 968–75.
335. Ramanakumar AV, Parent ME, Siemiatycki J. Risk of lung cancer from residential heating and cooking fuels in Montreal, Canada. *Am J Epidemiol* 2007; **165**(6): 634–42.
336. Ramani VK, Pattankar J, Puttahonnappa SK. Acute Respiratory Infections among Under-Five Age Group Children at Urban Slums of Gulbarga City: A Longitudinal Study. *J Clin Diagn Res* 2016; **10**(5): LC08–13.
337. Rana J, Uddin J, Peltier R, Oulhote Y. Associations between Indoor Air Pollution and Acute Respiratory Infections among Under-Five Children in Afghanistan: Do SES and Sex Matter? *International journal of environmental research and public health* 2019; **16**(16).
338. Raspanti GA, Hashibe M, Siwakoti B, et al. Household air pollution and lung cancer risk among never-smokers in Nepal. *Environ Res* 2016; **147**(Maryland Institute for Applied Environmental Health, University of Maryland School of Public Health, College Park, MD 20742, USA.): 141–5.
339. Regalado J, Perez-Padilla R, Sansores R, et al. The effect of biomass burning on respiratory symptoms and lung function in rural Mexican women. *Am J Respir Crit Care Med* 2006; **174**(8): 901–5.
340. Rehfuess EA, Tzala L, Best N, Briggs DJ, Joffe M. Solid fuel use and cooking practices as a major risk factor for ALRI mortality among African children. *Journal of Epidemiology and Community Health* 2009; **63**(11): 887–92.
341. Rey-Ares L, Irazola V, Althabe F, et al. Lower tract respiratory infection in children younger than 5 years of age and adverse pregnancy outcomes related to household air pollution in Bariloche (Argentina) and Temuco (Chile). *Indoor Air* 2016; **26**(6): 964–75.

342. Rinne ST, Rodas EJ, Rinne ML, Simpson JM, Glickman LT. Use of biomass fuel is associated with infant mortality and child health in trend analysis. *Am J Trop Med Hyg* 2007; **76**(3): 585–91.
343. Riojas-Rodriguez H, Romano-Riquer P, Santos-Burgoa C, Smith KR. Household firewood use and the health of children and women of Indian communities in Chiapas, Mexico. *International journal of occupational and environmental health* 2001; **7**(1): 44–53.
344. Robin LF, Lees PSJ, Winget M, et al. Wood-burning stoves and lower respiratory illnesses in Navajo children. *Pediatric Infectious Disease Journal* 1996; **15**(10): 859–65.
345. Romieu I, Riojas-Rodriguez H, Marron-Mares AT, Schilman A, Perez-Padilla R, Masera O. Improved biomass stove intervention in rural Mexico: impact on the respiratory health of women. *Am J Respir Crit Care Med* 2009; **180**(7): 649–56.
346. Rudnai P, Varro MJ, Macsik A, Szabo E, Benyi M. Respiratory symptoms of school children and their home environment in Northern Transdanubia, Hungary. *International Journal of Environment and Health* 2008; **2**(3/4): 386–96.
347. Rumchev K, Win T, Bertolatti D, Dhaliwal S. Prevalence of respiratory symptoms among children in rural Myanmar—disease burden assessment attributable to household biomass smoke. *Indoor and Built Environment* 2016; **25**(5): 728–36.
348. Rumchev K, Zhao Y, Spickett J. Health Risk Assessment of Indoor Air Quality, Socioeconomic and House Characteristics on Respiratory Health among Women and Children of Tirupur, South India. *International journal of environmental research and public health* 2017; **14**(4): 429.
349. Rylance S, Nightingale R, Naunje A, et al. Lung health and exposure to air pollution in Malawian children (CAPS): a cross-sectional study. *Thorax* 2019; **74**(11): 1070–7.
350. Salo PM, Xia J, Johnson CA, et al. Respiratory symptoms in relation to residential coal burning and environmental tobacco smoke among early adolescents in Wuhan, China: a cross-sectional study. *Environmental health : a global access science source* 2004; **3**(1): 14.
351. Sama SR, Kriebel D, Gore RJ, DeVries R, Rosiello R. Environmental triggers of COPD symptoms: a case cross-over study. *BMJ Open Respir Res* 2017; **4**(1): e000179.
352. Samet JM, Lambert WE, Skipper BJ, et al. Nitrogen dioxide and respiratory illnesses in infants. *Am Rev Respir Dis* 1993; **148**(5): 1258–65.
353. Samuel OW, Oni GA, Samir KC, Wurzer M, Akinyemi AI. Household use of solid fuel for cooking and under-five mortality in Nigeria. *African Population Studies* 2018; **32**(1 Suppl.): 4034–42.
354. Sana A, Meda N, Badoum G, Kafando B, Bouland C. Primary Cooking Fuel Choice and Respiratory Health Outcomes among Women in Charge of Household Cooking in Ouagadougou, Burkina Faso: Cross-Sectional Study. *International journal of environmental research and public health* 2019; **16**(6).
355. Sanbata H, Asfaw A, Kumie A. Association of biomass fuel use with acute respiratory infections among under-five children in a slum urban of Addis Ababa, Ethiopia. *Bmc Public Health* 2014; **14**(Journal Article).
356. Sanya RE, Kirenga BJ, Worodria W, Okot-Nwang M. Risk factors for asthma exacerbation in patients presenting to an emergency unit of a national referral hospital in Kampala, Uganda. *Afr Health Sci* 2014; **14**(3): 707–15.
357. Sapkota A, Gajalakshmi V, Jetly DH, et al. Indoor air pollution from solid fuels and risk of hypopharyngeal/laryngeal and lung cancers: a multicentric case-control study from India. *Int J Epidemiol* 2008; **37**(2): 321–8.
358. Sasco AJ, Merrill RM, Dari I, et al. A case-control study of lung cancer in Casablanca, Morocco. *Cancer Causes Control* 2002; **13**(7): 609–16.
359. Savitha MR, Nandeeshwara SB, Pradeep Kumar MJ, ul-Haque F, Raju CK. Modifiable risk factors for acute lower respiratory tract infections. *Indian J Pediatr* 2007; **74**(5): 477–82.
360. Schei MA, Hessen JO, Smith KR, Bruce N, McCracken J, Lopez V. Childhood asthma and indoor woodsmoke from cooking in Guatemala. *J Expo Anal Environ Epidemiol* 2004; **14** Suppl 1(1): S110–7.
361. Sezer H, Akkurt I, Guler N, Marakoglu K, Berk S. A case-control study on the effect of exposure to different substances on the development of COPD. *Ann Epidemiol* 2006; **16**(1): 59–62.
362. Shah N, Ramankutty V, Premila PG, Sathy N. Risk factors for severe pneumonia in children in south Kerala: a hospital-based case-control study. *J Trop Pediatr* 1994; **40**(4): 201–6.
363. Sharma S, Sethi GR, Rohtagi A, et al. Indoor air quality and acute lower respiratory infection in Indian urban slums. *Environ Health Perspect* 1998; **106**(5): 291–7.
364. Sharma D, Kuppusamy K, Bhoorasamy A. Prevalence of acute respiratory infections (ARI) and their determinants in under five children in urban and rural areas of Kancheepuram district, South India. *Annals of Tropical Medicine and Public Health* 2013; **6**(5): 513–8.
365. Shen M, Chapman RS, Vermeulen R, et al. Coal use, stove improvement, and adult pneumonia mortality in Xuanwei, China: a retrospective cohort study. *Environ Health Perspect* 2009; **117**(2): 261–6.
366. Shetty N, Shemko M, Vaz M, D'Souza G. An epidemiological evaluation of risk factors for tuberculosis in South India: a matched case control study. *Int J Tuberc Lung Dis* 2006; **10**(1): 80–6.
367. Shima M, Adachi M. Effect of outdoor and indoor nitrogen dioxide on respiratory symptoms in schoolchildren. *Int J Epidemiol* 2000; **29**(5): 862–70.

368. Shirinde J, Wichmann J, Vayi K. Association between wheeze and selected air pollution sources in an air pollution priority area in South Africa: a cross-sectional study. *Environ Health* 2014; **13**(1): 32.
369. Shrestha IL, Shrestha SL. Indoor air pollution from biomass fuels and respiratory health of the exposed population in Nepalese households. *International Journal of Occupational and Environmental Health* 2005; **11**(2): 150–60.
370. Siddharthan T, Grigsby MR, Goodman D, et al. Association between Household Air Pollution Exposure and Chronic Obstructive Pulmonary Disease Outcomes in 13 Low- and Middle-Income Country Settings. *Am J Respir Crit Care Med* 2018; **197**(5): 611–20.
371. Siddiqui AR, Lee K, Gold EB, Bhutta ZA. Eye and respiratory symptoms among women exposed to wood smoke emitted from indoor cooking: a study from southern Pakistan. *Energy for Sustainable Development* 2005; **9**(3): 58–66.
372. Siddiqui AR, Gold EB, Yang X, Lee K, Brown KH, Bhutta ZA. Prenatal exposure to wood fuel smoke and low birth weight. *Environ Health Perspect* 2008; **116**(4): 543–9.
373. Sikolia DN, Mwololo K, Cherop H, et al. The prevalence of acute respiratory infections and the associated risk factors: a study of children under five years of age in Kibera Lindi Village, Nairobi, Kenya. *Journal of National Institute of Public Health* 2002; **51**(1): 67–72.
374. Singh D, Arora V, Sobti PC. Chronic/recurrent cough in rural children in Ludhiana, Punjab. *Indian Pediatr* 2002; **39**(1): 23–9.
375. Sloan CD, Andrew AS, Gruber JF, et al. Indoor and Outdoor Air Pollution and Lung Cancer in New Hampshire and Vermont. *Toxicol Environ Chem* 2012; **94**(3): 605–15.
376. Smith BJ, Nitschke M, Pilotto LS, Ruffin RE, Pisaniello DL, Willson KJ. Health effects of daily indoor nitrogen dioxide exposure in people with asthma. *Eur Respir J* 2000; **16**(5): 879–85.
377. Smith KR, McCracken JP, Weber MW, et al. Effect of reduction in household air pollution on childhood pneumonia in Guatemala (RESPIRE): a randomised controlled trial. *Lancet* 2011; **378**(9804): 1717–26.
378. Smith-Sivertsen T, Diaz E, Pope D, et al. Effect of reducing indoor air pollution on women's respiratory symptoms and lung function: the RESPIRE Randomized Trial, Guatemala. *Am J Epidemiol* 2009; **170**(2): 211–20.
379. Sobue T. Association of indoor air pollution and lifestyle with lung cancer in Osaka, Japan. *Int J Epidemiol* 1990; **19 Suppl 1**(gr6, 7802871): S62–6.
380. Solis-Soto MT, Patino A, Nowak D, Radon K. Association between environmental factors and current asthma, rhinoconjunctivitis and eczema symptoms in school-aged children from Oropeza Province--Bolivia: a cross-sectional study. *Environ Health* 2013; **12**(Journal Article): 95.
381. Sood A, Petersen H, Blanchette CM, et al. Wood smoke exposure and gene promoter methylation are associated with increased risk for COPD in smokers. *Am J Respir Crit Care Med* 2010; **182**(9): 1098–104.
382. Soto-Moreno JA, Ballester-Diez F. [Indoor air pollution in extremely poor Colombian households]. *Rev Salud Publica (Bogota)* 2013; **15**(1): 80–9.
383. Speizer FE, Ferris B, Jr., Bishop YM, Spengler J. Respiratory disease rates and pulmonary function in children associated with NO<sub>2</sub> exposure. *Am Rev Respir Dis* 1980; **121**(1): 3–10.
384. Spengler JD, Jaakkola JJ, Parise H, Katsnelson BA, Privalova LI, Kosheleva AA. Housing characteristics and children's respiratory health in the Russian Federation. *Am J Public Health* 2004; **94**(4): 657–62.
385. Sreeramareddy CT, Shidhaye RR, Sathiakumar N. Association between biomass fuel use and maternal report of child size at birth--an analysis of 2005-06 India Demographic Health Survey data. *BMC Public Health* 2011; **11**(Journal Article): 403.
386. Stankovic A, Nikolic M, Arandjelovic M. Effects of indoor air pollution on respiratory symptoms of non-smoking women in Nis, Serbia. *Multidiscip Respir Med* 2011; **6**(6): 351–5.
387. Stankovic A, Mitrovic V, Zivadinovic R. [Influence of air pollution on pregnant women's health and pregnancy outcomes]. *Medicinski pregled* 2011; **64**(5-6): 279–84.
388. Stein L, Urban MI, Weber M, et al. Effects of tobacco smoking on cancer and cardiovascular disease in urban black South Africans. *Br J Cancer* 2008; **98**(9): 1586–92.
389. Strachan DP, Carey IM. Home environment and severe asthma in adolescence: a population based case-control study. *BMJ* 1995; **311**(7012): 1053–6.
390. Sukhsohale ND, Narlawar UW, Phatak MS. Indoor air pollution from biomass combustion and its adverse health effects in central India: an exposure-response study. *Indian J Community Med* 2013; **38**(3): 162–7.
391. Sun XW. [Heating fuels and respiratory diseases in the risks of female lung cancer]. *Zhonghua Zhong Liu Za Zhi* 1992; **13**(6): 413–5.
392. Sun X, Dai X, Shi Y, Lin Y. A case-control study on the relationship among indoor air pollution, depression and oncogenesis of lung cancer. *Chinese Journal of Lung Cancer* 2002; **5**(2): 101–3.
393. Sunyer J. Nitrogen dioxide is not associated with respiratory infection during the first year of life. *International Journal of Epidemiology* 2004; **33**(1): 116–20.
394. Suryadhi MAH, Abudureyimu K, Kashima S, Yorifuji T. Effects of Household Air Pollution From Solid Fuel Use and Environmental Tobacco Smoke on Child Health Outcomes in Indonesia. *Journal of occupational and environmental medicine* 2019; **61**(4): 335-9.

395. Svendsen ER, Gonzales M, Commodore A. The role of the indoor environment: Residential determinants of allergy, asthma and pulmonary function in children from a US-Mexico border community. *The Science of the total environment* 2018; **616-617**(Journal Article): 1513–23.
396. Tamire M, Addissie A, Kumie A, et al. Respiratory Symptoms and Lung Function among Ethiopian Women in Relation to Household Fuel Use. *International journal of environmental research and public health* 2020; **17**(1).
397. Tan WC, Sin DD, Bourbeau J, et al. Characteristics of COPD in never-smokers and ever-smokers in the general population: results from the CanCOLD study. *Thorax* 2015; **70**(9): 822–9.
398. Tavernier G, Fletcher G, Gee I, et al. IPEADAM study: Indoor endotoxin exposure, family status, and some housing characteristics in English children. *Journal of Allergy and Clinical Immunology* 2006; **117**(3): 656–62.
399. Taylor ET, Nakai S. Prevalence of acute respiratory infections in women and children in Western Sierra Leone due to smoke from wood and charcoal stoves. *International journal of environmental research and public health* 2012; **9**(6): 2252–65.
400. Tazinya AA, Halle-Ekane GE, Mbuagbaw LT, Abanda M, Atashili J, Obama MT. Risk factors for acute respiratory infections in children under five years attending the Bamenda Regional Hospital in Cameroon. *BMC Pulm Med* 2018; **18**(1): 7.
401. Thacher JD, Emmelin A, Madaki AJ, Thacher TD. Biomass fuel use and the risk of asthma in Nigerian children. *Respir Med* 2013; **107**(12): 1845–51.
402. Thompson LM, Bruce N, Eskenazi B, Diaz A, Pope D, Smith KR. Impact of reduced maternal exposures to wood smoke from an introduced chimney stove on newborn birth weight in rural Guatemala. *Environ Health Perspect* 2011; **119**(10): 1489–94.
403. Tielsch JM, Katz J, Thulasiraj RD, et al. Exposure to indoor biomass fuel and tobacco smoke and risk of adverse reproductive outcomes, mortality, respiratory morbidity and growth among newborn infants in south India. *International Journal of Epidemiology* 2009; **38**(5): 1351–63.
404. Tin ST, Woodward A, Saraf R, et al. Internal living environment and respiratory disease in children: findings from the Growing Up in New Zealand longitudinal child cohort study. *Environmental Health* 2016; **15**(120).
405. Trang N, Lurie M, Gomez M, Reddy A, Pandya K, Medvesky M. The National Asthma Survey - New York State: association of the home environment with current asthma status. *Public Health Reports* 2010; **125**(6): 877–87.
406. Tripathy JP, Mishra S. Causes and Predictors of Neonatal, Post-neonatal and Maternal Deaths in India: Analysis of a Nationwide District-Level Household Survey-4 (DLHS-4), 2012-13. *J Trop Pediatr* 2017; **63**(6): 431–9.
407. Tse LA, Yu IT, Qiu H, Au JS, Wang XR. A case-referent study of lung cancer and incense smoke, smoking, and residential radon in Chinese men. *Environ Health Perspect* 2011; **119**(11): 1641–6.
408. Tumwesigire SG, Barton T. Environmental Risk-Factors for Acute Respiratory-Infections among Children of Military Personnel in Uganda. *East African Medical Journal* 1995; **72**(5): 290–4.
409. Tuthill RW. Woodstoves, formaldehyde, and respiratory disease. *Am J Epidemiol* 1984; **120**(6): 952–5.
410. Upadhyay AK, Singh A, Kumar K, Singh A. Impact of indoor air pollution from the use of solid fuels on the incidence of life threatening respiratory illnesses in children in India. *Bmc Public Health* 2015; **15**(300).
411. Uzun K, Ozbay B, Ceylan E, Gencer M, Zehir I. Prevalence of chronic bronchitis-asthma symptoms in biomass fuel exposed females. *Environ Health Prev Med* 2003; **8**(1): 13–7.
412. van Gemert F, Chavannes N, Kirenga B, et al. Socio-economic factors, gender and smoking as determinants of COPD in a low-income country of sub-Saharan Africa: FRESH AIR Uganda. *NPJ Prim Care Respir Med* 2016; **26**(101631999): 16050.
413. Van Miert E, Sardella A, Nickmilder M, Bernard A. Respiratory effects associated with wood fuel use: a cross-sectional biomarker study among adolescents. *Pediatr Pulmonol* 2012; **47**(4): 358–66.
414. van Strien RT, Gent JF, Belanger K, Triche E, Bracken MB, Leaderer BP. Exposure to NO<sub>2</sub> and nitrous acid and respiratory symptoms in the first year of life. *Epidemiology (Cambridge, Mass)* 2004; **15**(4): 471–8.
415. Van Vliet EDS, Kinney PL, Owusu-Agyei S, et al. Current respiratory symptoms and risk factors in pregnant women cooking with biomass fuels in rural Ghana. *Environment International* 2019; **124**: 533–40.
416. Guddattu V, Swathi A, Nair NS. Household and environment factors associated with asthma among Indian women: a multilevel approach. *J Asthma* 2010; **47**(4): 407–11.
417. Viegi G, Paoletti P, Carrozzi L, et al. Effects of home environment on respiratory symptoms and lung function in a general population sample in north Italy. *Eur Respir J* 1991; **4**(5): 580–6.
418. Venn AJ, Yemaneberhan H, Bekele Z, Lewis SA, Parry E, Britton J. Increased risk of allergy associated with the use of kerosene fuel in the home. *American Journal of Respiratory and Critical Care Medicine* 2001; **164**(9): 1660–4.
419. Victora CG, Fuchs SC, Flores JAC, Fonseca W, Kirkwood B. Risk-Factors for Pneumonia among Children in a Brazilian Metropolitan-Area. *Pediatrics* 1994; **93**(6): 977–85.
420. Viegi G, Carrozzi L, Paoletti P, et al. Effects of the home environment on respiratory symptoms of a general population sample in middle Italy. *Arch Environ Health* 1992; **47**(1): 64–70.

421. Volkmer RE, Ruffin RE, Wigg NR, Davies N. The prevalence of respiratory symptoms in South Australian preschool children. II. Factors associated with indoor air quality. *J Paediatr Child Health* 1995; **31**(2): 116–20.
422. von Maffei J, Beckett WS, Belanger K, et al. Risk Factors for Asthma Prevalence Among Urban and Nonurban African American Children. *Journal of Asthma* 2001; **38**(7): 555–64.
423. von Mutius E, Illi S, Nicolai T, Martinez FD. Relation of indoor heating with asthma, allergic sensitisation, and bronchial responsiveness: survey of children in south Bavaria. *BMJ* 1996; **312**(7044): 1448–50.
424. Wafula EM, Kinyanjui MM, Nyabola L, Tenambergen ED. Effect of improved stoves on prevalence of acute respiratory infection and conjunctivitis among children and women in a rural community in Kenya. *East African Medical Journal* 2000; **77**(1): 37–41.
425. Walker ES, Clark ML, Young BN, et al. Exposure to household air pollution from biomass cookstoves and self-reported symptoms among women in rural Honduras. *International Journal of Environmental Health Research* 2020; **30**(2): 160–73.
426. Wang GX. [Multivariate analyses of causal factors included cooking oil fume and others in matched case-control study of lung cancer]. *Zhonghua Yu Fang Yi Xue Za Zhi* 1992; **26**(2): 89–91.
427. Wang TJ, Zhou BS, Shi JP. Lung cancer in nonsmoking Chinese women: a case-control study. *Lung Cancer* 1996; **14 Suppl 1**(b3u, 8800805): S93–8.
428. Wang TT, Zhao ZH, Yao H, et al. Housing characteristics and indoor environment in relation to children's asthma, allergic diseases and pneumonia in Urumqi, China. *Chinese Science Bulletin* 2013; **58**(34): 4237–44.
429. Ware JH, Dockery DW, Spiro A, 3rd, Speizer FE, Ferris BG, Jr. Passive smoking, gas cooking, and respiratory health of children living in six cities. *Am Rev Respir Dis* 1984; **129**(3): 366–74.
430. Ware DN, Lewis J, Hopkins S, et al. Household reporting of childhood respiratory health and air pollution in rural Alaska Native communities. *Int J Circumpolar Health* 2014; **73**(Journal Article): 1–10.
431. Wayse V, Yousafzai A, Mogale K, Filteau S. Association of subclinical vitamin D deficiency with severe acute lower respiratory infection in Indian children under 5 y. *Eur J Clin Nutr* 2004; **58**(4): 563–7.
432. Weber E, Adu-Bonsaffoh K, Vermeulen R, et al. Household fuel use and adverse pregnancy outcomes in a Ghanaian cohort study. *Reproductive Health* 2020; **17**(1).
433. Wichmann J, Voyo KVV. Impact of cooking and heating fuel use on acute respiratory health of preschool children in South Africa. *Southern African Journal of Epidemiology & Infection* 2006; **21**(2): 48–54.
434. Wichmann J, Voyo KV. Influence of cooking and heating fuel use on 1–59 month old mortality in South Africa. *Matern Child Health J* 2006; **10**(6): 553–61.
435. Wichmann J, Wolvaardt JE, Maritz C, Voyo KVV. Household Conditions, Eczema Symptoms and Rhinitis Symptoms: Relationship with Wheeze and Severe Wheeze in Children Living in the Polokwane Area, South Africa. *Maternal and Child Health Journal* 2009; **13**(1): 107–18.
436. Willers SM, Brunekreef B, Oldenwening M, et al. Gas cooking, kitchen ventilation, and asthma, allergic symptoms and sensitization in young children--the PIAMA study. *Allergy* 2006; **61**(5): 563–8.
437. Withers NJ, Low L, Holgate ST, Clough JB. The natural history of respiratory symptoms in a cohort of adolescents. *Am J Respir Crit Care Med* 1998; **158**(2): 352–7.
438. Woldeamanuel GG, Mingude AB, Geta TG. Prevalence of chronic obstructive pulmonary disease (COPD) and its associated factors among adults in Abeshge District, Ethiopia: a cross sectional study. *BMC Pulm Med* 2019; **19**(1): 181.
439. Woldeamayem EM, Datiko DG, Lindtjorn B. Use of biomass fuel in households is not a risk factor for pulmonary tuberculosis in South Ethiopia. *Int J Tuberc Lung Dis* 2014; **18**(1): 67–72.
440. Wolff PT, Arison L, Rahajamiakatra A, Raserijaona F, Niggemann B. High asthma prevalence and associated factors in urban malagasy schoolchildren. *J Asthma* 2012; **49**(6): 575–80.
441. Wong GW, Ko FW, Hui DS, et al. Factors associated with difference in prevalence of asthma in children from three cities in China: multicentre epidemiological survey. *BMJ* 2004; **329**(7464): 486.
442. Wong GWK, Brunekreef B, Ellwood P, et al. Cooking fuels and prevalence of asthma: a global analysis of phase three of the International Study of Asthma and Allergies in Childhood (ISAAC). *Lancet Respiratory Medicine* 2013; **1**(5): 386–94.
443. Wong JYY, Downward GS, Hu W, et al. Lung cancer risk by geologic coal deposits: A case-control study of female never-smokers from Xuanwei and Fuyuan, China. *International journal of cancer* 2019; **144**(12): 2918–27.
444. Wu AH, Henderson BE, Pike MC, Yu MC. Smoking and other risk factors for lung cancer in women. *J Natl Cancer Inst* 1985; **74**(4): 747–51.
445. Wu J, Tang C, Zhuang Z. Effect of indoor air pollution related to traffic and fuel gas using for cooking on respiratory diseases in children and teenagers in urban area of Shanghai. *Journal of Environment and Health* 2010; **27**(3): 244–7.
446. Wu ZY, Zhang SJ, Tang YT, et al. Indoor environment in relation to recurrent childhood pneumonia in Southern China. *Building and Environment* 2020; **172**.
447. Wu-Williams AH, Dai XD, Blot W, et al. Lung cancer among women in north-east China. *British journal of cancer* 1990; **62**(6): 982–7.

448. Wylie BJ, Coull BA, Hamer DH, et al. Impact of biomass fuels on pregnancy outcomes in central East India. *Environ Health* 2014; **13**(1): 1.
449. Xu ZY, Blot WJ, Xiao HP, et al. Smoking, air pollution, and the high rates of lung cancer in Shenyang, China. *J Natl Cancer Inst* 1989; **81**(23): 1800–6.
450. Xu X, Wang L. Association of indoor and outdoor particulate level with chronic respiratory illness. *Am Rev Respir Dis* 1993; **148**(6 Pt 1): 1516–22.
451. Xu X, Niu T, Christiani DC, et al. Occupational and Environmental Risk Factors for Asthma in Rural Communities in China. *Int J Occup Environ Health* 1996; **2**(3): 172–6.
452. Yang CY, Chiu JF, Cheng MF, Lin MC. Effects of indoor environmental factors on respiratory health of children in a subtropical climate. *Environmental Research* 1997; **75**(1): 49–55.
453. Yang L, Lu X, Deng J, et al. Risk factors shared by COPD and lung cancer and mediation effect of COPD: two center case-control studies. *Cancer Causes Control* 2015; **26**(1): 11–24.
454. Yu IT, Li AM, Goggins W, et al. Association of wheeze during the first 18 months of life with indoor nitrogen dioxide, formaldehyde, and family history of asthma: a prospective cohort study. *Hong Kong medical journal = Xianggang yi xue za zhi* 2017; **23**(3 Supplement 2): 19–23.
455. Yu K, Lv J, Qiu GK, et al. Cooking fuels and risk of all-cause and cardiopulmonary mortality in urban China: a prospective cohort study. *Lancet Global Health* 2020; **8**(3): E430–E9.
456. Yucra S, Tapia V, Steenland K, Naeher LP, Gonzales GF. Association Between Biofuel Exposure and Adverse Birth Outcomes at High Altitudes in Peru: A Matched Case-control Study. *International Journal of Occupational and Environmental Health* 2011; **17**(4): 307–13.
457. Yusuf S, Joseph P, Rangarajan S, et al. Modifiable risk factors, cardiovascular disease, and mortality in 155 722 individuals from 21 high-income, middle-income, and low-income countries (PURE): a prospective cohort study. *Lancet* 2020; **395**(10226): 795–808.
458. Zacharasiewicz A, Zidek T, Haidinger G, Waldhor T, Suess G, Vutuc C. Indoor factors and their association to respiratory symptoms suggestive of asthma in Austrian children aged 6–9 years. *WIENER KLINISCHE WOCHENSCHRIFT* 1999; **111**(21): 882–6.
459. Zejda JE, Kowalska M. Risk factors for asthma in school children--results of a seven-year follow-up. *Cent Eur J Public Health* 2003; **11**(3): 149–54.
460. Zha ZQ, Leng RX, Xu W, et al. Prevalence and risk factors of chronic obstructive pulmonary disease in Anhui Province, China: a population-based survey. *BMC Pulm Med* 2019; **19**.
461. Zhang ZF, Yu SZ, Zhou GD. Indoor air pollution of coal fumes as a risk factor of stroke, Shanghai. *Am J Public Health* 1988; **78**(8): 975–7.
462. Zhang LX, Enarson DA, He GX, Li B, Chan-Yeung M. Occupational and environmental risk factors for respiratory symptoms in rural Beijing, China. *European Respiratory Journal* 2002; **20**(6): 1525–31.
463. Zhao X, Huang X, Huang P, et al. [Interaction between exposure to environmental smoke and the family history of chronic bronchitis (CB) on the risk of CB in rural females in Liuyang city, Hunan province]. *Zhonghua Liu Xing Bing Xue Za Zhi* 2009; **30**(12): 1258–60.
464. Zheng T, Niu S, Lu B, et al. Childhood asthma in Beijing, China: a population-based case-control study. *Am J Epidemiol* 2002; **156**(10): 977–83.
465. Zheng XH, Qian H, Zhao YL, et al. Home risk factors for childhood pneumonia in Nanjing, China. *Chinese Science Bulletin* 2013; **58**(34): 4230–6.
466. Zhong LJ, Goldberg MS, Gao YT, Jin F. Lung cancer and indoor air pollution arising from Chinese style cooking among nonsmoking women living in Shanghai, China. *Epidemiology (Cambridge, Mass)* 1999; **10**(5): 488–94.
467. Zhong N, Wang C, Yao W, et al. Prevalence of chronic obstructive pulmonary disease in China: a large, population-based survey. *Am J Respir Crit Care Med* 2007; **176**(8): 753–60.
468. Zhou H. The Health Effects of Using Coal for Cooking to Infants. *Journal of Environment and Health* 1994; **3**.
469. Zhou X, Jin Y, He X. [A study on the relationship between in-door air pollution and chronic obstructive pulmonary disease in Xuanwei County]. *Zhonghua yu fang yi xue za zhi [Chinese journal of preventive medicine]* 1995; **29**(1): 38–40.
470. Zhou Y, Wang C, Yao W, et al. COPD in Chinese nonsmokers. *Eur Respir J* 2009; **33**(3): 509–18.
471. Zhou C, Baiz N, Zhang T, Banerjee S, Annesi-Maesano I, Group EM-CCS. Modifiable exposures to air pollutants related to asthma phenotypes in the first year of life in children of the EDEN mother-child cohort study. *BMC Public Health* 2013; **13**(Journal Article): 506.
472. Zhou Y, Zou Y, Li X, et al. Lung function and incidence of chronic obstructive pulmonary disease after improved cooking fuels and kitchen ventilation: a 9-year prospective cohort study. *PLoS Med* 2014; **11**(3): e1001621.
